# Supplementary material for: Palladium-catalyzed regio- and stereoselective allylic alkylation of 5-vinyloxazolidine-2,4-diones with azlactones: synthesis of chiral (Z)-trisubstituted allylic amino acid derivatives
Source: Royal Society of Chemistry journal article supplement (doi:10.1039/d3qo01155k), 2023-01-01
Supplement: d3qo01155k1.pdf [file d3qo01155k1.pdf]

## Electronic Supplementary Information

### **Palladium-Catalyzed Regio- and Stereoselective Allylic Alkylation of 5-Vinyloxazolidine-2,4-diones with Azlactones: Synthesis of Chiral (Z)-Trisubstituted Allylic Amino Acid Derivatives**

Kuan Li,<sup>†</sup> Lan Wang,<sup>†</sup> Shuo Zhen,<sup>†</sup> Lihan Zhu,<sup>‡</sup> Songcheng Yu,<sup>§</sup> Yongjun Wu,<sup>§</sup> and Hongchao Guo<sup>†\*</sup>

<sup>†</sup> *Department of Chemistry and Innovation Center of Pesticide Research, China Agricultural University, Beijing 100193, China.*

<sup>‡</sup> *School of Chemistry, Dalian University of Technology, Dalian 116024, P. R. China*

<sup>§</sup> *College of Public Health, Zhengzhou University, Zhengzhou 450001, P. R. China*

*E-mail: hchguo@cau.edu.cn*

#### CONTENTS

|                                                                                 |      |
|---------------------------------------------------------------------------------|------|
| General Information                                                             | S2   |
| General Procedure for Palladium-Catalyzed Asymmetric Decarboxylative Allylation | S2   |
| General Procedure for Scaled-up Asymmetric Decarboxylative Allylation           | S3   |
| General Procedure for Further Transformation                                    | S3   |
| Characterization Data of Products                                               | S4   |
| NMR Spectra of Products                                                         | S23  |
| HPLC Chromatograms of All Products                                              | S61  |
| X-Ray Crystallographic Data of <b>3ak</b>                                       | S99  |
| Density functional calculations (DFT)                                           | S111 |

## General Information

All reactions were performed in Schlenk tubes under an atmosphere of argon using oven-dried glassware. Commercially obtained reagents were used without further purification, unless otherwise noted. Trichloromethane (CHCl<sub>3</sub>) was distilled over P<sub>2</sub>O<sub>5</sub> and stored over 3 Å type molecular sieves. Tetrahydrofuran (THF) and toluene were distilled freshly before use over sodium and benzophenone. *m*-Xylene, Ethyl acetate (EA), Dichloromethane (DCM) and 1,2-dichloroethane (DCE) were distilled from CaH<sub>2</sub>. Reactions were checked for completion by TLC analysis and plates were visualized with short-wave UV light (254 nm). The <sup>1</sup>H, <sup>13</sup>C and <sup>19</sup>F NMR spectra were obtained in CDCl<sub>3</sub> using a Bruker-BioSpin AVANCE III HD NMR spectrometer at 500, 125 and 470 MHz, respectively. Chemical shifts are reported in parts per million (δ value) calibrated against the residual solvent peak. Signal patterns are indicated as follows: s, singlet; d, doublet; t, triplet; q, quartet; m, multiplet. Coupling constants (*J*) are given in hertz (Hz). The infrared spectra were recorded on a Bruker VERTEX 70 IR spectrometer as KBr pellets, with absorption reported in cm<sup>-1</sup>. High-resolution mass spectra were recorded on a Bruker Impact II UHR TOF LC/MS Mass Spectrometry. Melting points were determined on a Stuard SMP3 melting point apparatus. X-ray crystallographic data were collected using a MM007HF Saturn724+. HPLC analysis was performed on Agilent 1220 series, UV detection monitored at 254 nm, using a Chiralpak AD-H column, Chiralcel OD-H column, Chiralcel OX-H column, Chiralpak IA column, Chiralpak IC column, Chiralpak ID column and Chiralpak IH column with hexane and <sup>t</sup>PrOH as the eluent.

## General Procedure A for Palladium-Catalyzed Asymmetric Decarboxylative Allylation

To an oven-dried 25 mL of Schlenk tube equipped with a stir bar, Pd<sub>2</sub>dba<sub>3</sub>·CHCl<sub>3</sub> (5 mol%) and (1*R*,4*S*,5*S*,6*S*)-5,6-dibenzhydrylbicyclo[2.2.1]hept-2-ene (20 mol%) was added along with γ-vinylaminobutyrolactones **1**<sup>1</sup> (0.15 mmol), 4-*tert*-butyl-2-phenyloxazol-5(4*H*)-ones **2**<sup>2-3</sup> (0.1 mmol) and DCM (1.0 mL). The reaction was stirred at 25 °C under argon atmosphere until complete consumption of 4-*tert*-butyl-2-phenyloxazol-5(4*H*)-ones **2** as monitored by thin layer chromatography. The reaction mixture was directly purified by silica gel column chromatography (Ethyl acetate/Petroleum ether = 1:10 or 1:5) to afford the desired products **3**.

---

<sup>1</sup> Li, K.; Zhen, S.; Wang, W.; Du, J.; Yu, S.; Wu, Y.; Guo, H. *Chem. Sci.* **2023**, *14*, 3024–3029.

<sup>2</sup> Wang, L.; Liu, M.; Lu, M.; Wang, B.; Han, Q.; Jin, J.; Yu, S.; Wu, Y.; Guo, H. *Org. Chem. Front.* **2023**, *10*, 813–818.

<sup>3</sup> Wakafuji, K.; Lwasa, S.; Ouchida, K. N.; Cho, H.; Dohi, H.; Yamamoto, E.; Kamachi, T.; Tokunaga, M. *ACS Catal.* **2021**, *11*, 14067–14075.

### General Procedure B for Scaled-up Asymmetric Decarboxylative Allylation

To an oven-dried 100 mL of Schlenk tube equipped with a stir bar, Pd<sub>2</sub>dba<sub>3</sub>·CHCl<sub>3</sub> (5 mol%) and (1*R*,4*S*,5*S*,6*S*)-5,6-dibenzhydrylbicyclo[2.2.1]hept-2-ene (20 mol%) was added along with  $\gamma$ -vinylaminobutyrolactone **1k** (1.5 mmol), 4-*tert*-butyl-2-phenyloxazol-5(4*H*)-one **2a** (1.0 mmol) and DCM (10.0 mL). The reaction was stirred at 25 °C under argon atmosphere until complete consumption of 4-*tert*-butyl-2-phenyloxazol-5(4*H*)-one **2a** as monitored by thin layer chromatography. The reaction mixture was directly purified by silica gel column chromatography (Ethyl acetate/Petroleum ether = 1:5) to afford the desired product **3ak**.

### General Procedure C for Further Transformation

To a sealed tube equipped with compound **3ak** (0.1 mmol) in MeOH (1.0 mL) were added K<sub>2</sub>CO<sub>3</sub> (2.5 equiv.). The reaction mixture stirred at room temperature for 20 h. After completion, the resulting mixture was concentrated and the residue was purified by flash chromatography on silica gel (Petroleum ether/Ethyl acetate = 3:1) to give the corresponding product **4a**.

### General Procedure D for Further Transformation

The NaBH<sub>4</sub> (1.0 mmol) was added to a solution of **3ak** (0.1 mmol) in MeOH (1.0 mL) at 0 °C. The reaction was stirring at 0 °C for 3 h, The reaction was quenched with saturated aq. NH<sub>4</sub>Cl (10.0 mL) and extracted with ethyl acetate (15.0 mL x 3). The combined organic layers were washed with brine (20.0 mL), dried over Na<sub>2</sub>SO<sub>4</sub>, filtered, concentrated under the reduced pressure. The residue purified by silica gel column chromatography (Petroleum ether/Ethyl acetate = 2:1) to afford desired adduct **4b**.

### General Procedure E for Further Transformation

The NaBH<sub>4</sub> (1.0 mmol) was added to a solution of **3ak** (0.1 mmol) in MeOH (1.0 mL) at 0 °C. The reaction was stirring at 0 °C for 3 h, The reaction was quenched with saturated aqueous NH<sub>4</sub>Cl (5.0 mL) and extracted with ethyl acetate (15.0 mL x 3). The combined organic layers were washed with brine (20.0 mL), dried over Na<sub>2</sub>SO<sub>4</sub>, filtered, concentrated under the reduced pressure. The residue was dissolved in dichloromethane (1.5 mL) at 0 °C, and Dess-Martin periodinane (DMP, 0.15 mmol) was added. The reaction mixture was stirred at room temperature for additional 0.5 h, the residue was purified by column chromatography on silica gel (Petroleum ether/Ethyl acetate = 2:1) to afford **4c**.

## Characterization Data of Substrates and Products

### (*S*, *Z*)-4-(4-(tert-butyl)-5-oxo-2-phenyl-4,5-dihydrooxazol-4-yl)-*N*,2-diphenylbut-2-enamide

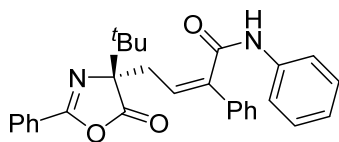

**3aa**

white solid, 41.3 mg, 91%, Mp: 138 – 140 °C, 94% *ee*,  $[\alpha]_D^{25} = +104.0$  (*c* 0.5, CH<sub>2</sub>Cl<sub>2</sub>). <sup>1</sup>H NMR (500 MHz, CDCl<sub>3</sub>): δ 9.14 (s, 1H), 7.97 – 7.89 (m, 2H), 7.82 – 7.73 (m, 2H), 7.54 – 7.48 (m, 1H), 7.44 – 7.38 (m, 2H), 7.34 – 7.29 (m, 2H), 7.22 – 7.17 (m, 2H), 7.16 – 7.11 (m, 3H), 7.11 – 7.06 (m, 1H), 5.68 – 5.62 (dd, *J* = 9.5, 7.0 Hz, 1H), 3.17 – 3.08 (dd, *J* = 13.5, 9.5 Hz, 1H), 2.97 – 2.90 (dd, *J* = 13.5, 7.0 Hz, 1H), 1.03 (s, 9H). <sup>13</sup>C NMR (CDCl<sub>3</sub>, 125 MHz): δ 179.1, 166.3, 161.5, 144.0, 138.4, 137.0, 133.4, 129.2, 129.2, 128.5, 128.3, 127.9, 126.9, 125.1, 124.4, 123.2, 119.6, 78.7, 37.8, 32.8, 25.0. IR (film)  $\nu_{\max}$  3060, 2968, 1819, 1678, 1648, 1598, 1441, 1296, 1018, 755. HRMS (ESI, *m/z*) calcd for C<sub>29</sub>H<sub>29</sub>N<sub>2</sub>O<sub>3</sub><sup>+</sup> [M+H]<sup>+</sup>: 453.2173, found: 453.2171. The *ee* value was determined by the chiral HPLC analysis (CHIRALCEL OX-H, *n*-hexane/2-propanol = 90 : 10,  $\nu$  = 1.0 mL/min,  $\lambda$  = 254.0 nm;  $t_{\text{major}}$  = 12.3 min,  $t_{\text{minor}}$  = 19.2 min).

### (*S*, *Z*)-4-(4-(tert-butyl)-5-oxo-2-phenyl-4,5-dihydrooxazol-4-yl)-*N*-(3-fluorophenyl)-2-phenylbut-2-enamide

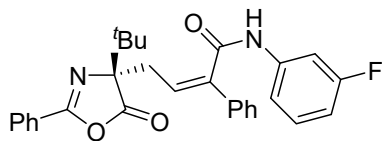

**3ab**

Colorless oil, 41.8 mg, 89%, 94% *ee*,  $[\alpha]_D^{25} = +96.0$  (*c* 0.5, CH<sub>2</sub>Cl<sub>2</sub>). <sup>1</sup>H NMR (500 MHz, CDCl<sub>3</sub>): δ 9.36 (s, 1H), 8.05 – 7.95 (m, 2H), 7.85 – 7.76 (m, 1H), 7.65 – 7.56 (m, 1H), 7.54 – 7.44 (m, 3H), 7.38 – 7.29 (m, 1H), 7.28 – 7.17 (m, 5H), 6.91 – 6.81 (m, 1H), 5.78 – 5.70 (dd, *J* = 10.0, 7.0 Hz, 1H), 3.22 – 3.12 (dd, *J* = 13.5, 10.0 Hz, 1H), 3.06 – 2.95 (dd, *J* = 13.5, 7.0 Hz, 1H), 1.11 (s, 9H). <sup>13</sup>C NMR (CDCl<sub>3</sub>, 125 MHz): δ 179.0, 166.4, 163.1 (d, *J* = 243.1 Hz), 161.6, 143.8, 139.8 (d, *J* = 10.6 Hz), 136.8, 133.5, 130.2 (d, *J* = 9.1 Hz), 129.2, 128.5, 128.4, 127.9, 126.9, 125.0, 123.6, 114.8 (d, *J* = 2.9 Hz), 111.2 (d, *J* = 21.3 Hz), 107.1 (d, *J* = 26.1 Hz), 78.7, 37.8, 32.7, 25.0. <sup>19</sup>F NMR (CDCl<sub>3</sub>, 470 MHz): δ –111.1. IR (film)  $\nu_{\max}$  3062, 2969, 1820, 1683, 1647, 1604, 1540, 1019, 889, 774. HRMS (ESI, *m/z*) calcd for C<sub>29</sub>H<sub>28</sub>FN<sub>2</sub>O<sub>3</sub><sup>+</sup> [M+H]<sup>+</sup>: 471.2078, found: 471.2076. The *ee* value was determined by the chiral HPLC analysis (CHIRALCEL OX-H, *n*-hexane/2-propanol = 90 : 10,  $\nu$  = 1.0 mL/min,  $\lambda$  = 254.0 nm;  $t_{\text{major}}$  = 8.1 min,  $t_{\text{minor}}$  = 10.7 min).

**(S, Z)-4-(4-(tert-butyl)-5-oxo-2-phenyl-4,5-dihydrooxazol-4-yl)-N-(4-fluorophenyl)-2-phenylbut-2-enamide**

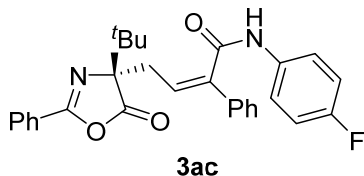

Colorless oil, 45.1 mg, 96%, 95% *ee*,  $[\alpha]_D^{25} = +88.0$  (*c* 0.5, CH<sub>2</sub>Cl<sub>2</sub>). <sup>1</sup>H NMR (500 MHz, CDCl<sub>3</sub>): δ 9.20 (s, 1H), 8.04 – 7.96 (m, 2H), 7.85 – 7.77 (m, 2H), 7.63 – 7.55 (m, 1H), 7.53 – 7.45 (t, *J* = 7.0 Hz, 2H), 7.28 – 7.19 (m, 5H), 7.13 – 7.05 (m, 2H), 5.79 – 5.68 (dd, *J* = 9.5, 7.0 Hz, 1H), 3.22 – 3.13 (dd, *J* = 13.5, 9.5 Hz, 1H), 3.07 – 2.96 (dd, *J* = 13.5, 7.0 Hz, 1H), 1.10 (s, 9H). <sup>13</sup>C NMR (CDCl<sub>3</sub>, 125 MHz): δ 179.1, 166.2, 161.5, 159.4 (d, *J* = 243.5 Hz), 143.9, 136.9, 134.4 (d, *J* = 2.8 Hz), 133.4, 129.2, 128.5, 128.3, 127.9, 126.9, 125.0, 123.4, 121.1 (d, *J* = 7.7 Hz), 115.8 (d, *J* = 22.3 Hz), 78.8, 37.8, 32.7, 25.0. <sup>19</sup>F NMR (CDCl<sub>3</sub>, 470 MHz): δ -117.8. IR (film)  $\nu_{\max}$  3059, 2970, 1820, 1677, 1652, 1540, 1508, 1295, 1214, 889, 692. HRMS (ESI, *m/z*) calcd for C<sub>29</sub>H<sub>28</sub>FN<sub>2</sub>O<sub>3</sub><sup>+</sup> [M+H]<sup>+</sup>: 471.2078, found: 471.2075. The *ee* value was determined by the chiral HPLC analysis (CHIRALCEL OX-H, *n*-hexane/2-propanol = 90 : 10,  $\nu$  = 1.0 mL/min,  $\lambda$  = 254.0 nm;  $t_{\text{major}}$  = 11.1 min,  $t_{\text{minor}}$  = 13.5 min).

**(S, Z)-4-(4-(tert-butyl)-5-oxo-2-phenyl-4,5-dihydrooxazol-4-yl)-N-(3-chlorophenyl)-2-phenylbut-2-enamide**

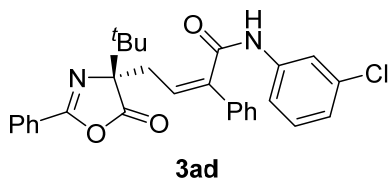

Colorless oil, 43.3 mg, 89%, 94% *ee*,  $[\alpha]_D^{25} = +112.0$  (*c* 0.5, CH<sub>2</sub>Cl<sub>2</sub>). <sup>1</sup>H NMR (500 MHz, CDCl<sub>3</sub>): δ 9.21 (s, 1H), 7.96 – 7.88 (m, 3H), 7.59 – 7.49 (m, 2H), 7.46 – 7.38 (t, *J* = 8.0 Hz, 2H), 7.26 – 7.20 (t, *J* = 8.0 Hz, 1H), 7.19 – 7.12 (m, 5H), 7.09 – 7.03 (dd, *J* = 8.5, 2.0 Hz, 1H), 5.70 – 5.63 (dd, *J* = 10.0, 7.5 Hz, 1H), 3.14 – 3.05 (dd, *J* = 14.0, 10.0 Hz, 1H), 2.97 – 2.89 (dd, *J* = 14.0, 7.5 Hz, 1H), 1.03 (s, 9H). <sup>13</sup>C NMR (CDCl<sub>3</sub>, 125 MHz): δ 179.0, 166.4, 161.6, 143.8, 139.5, 136.8, 134.9, 133.5, 130.1, 129.3, 128.5, 128.4, 127.9, 126.9, 125.0, 124.5, 123.6, 119.7, 117.4, 78.7, 37.8, 32.7, 25.0. IR (film)  $\nu_{\max}$  3060, 2969, 1820, 1677, 1598, 1018, 889, 692, 670. HRMS (ESI, *m/z*) calcd for C<sub>29</sub>H<sub>28</sub>ClN<sub>2</sub>O<sub>3</sub><sup>+</sup> [M+H]<sup>+</sup>: 487.1783, found: 487.1781. The *ee* value was determined by the chiral HPLC analysis (CHIRALCEL OX-H, *n*-hexane/2-propanol = 95 : 5,  $\nu$  = 1.0 mL/min,  $\lambda$  = 254.0 nm;  $t_{\text{major}}$  = 10.5 min,  $t_{\text{minor}}$  = 14.6 min).

**(S, Z)-4-(4-(tert-butyl)-5-oxo-2-phenyl-4,5-dihydrooxazol-4-yl)-N-(4-chlorophenyl)-2-phenylbut-2-enamide**

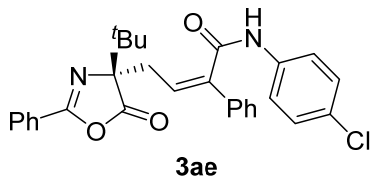

Colorless oil, 43.0 mg, 88%, 94% *ee*,  $[\alpha]_D^{25} = +128.0$  (*c* 0.5, CH<sub>2</sub>Cl<sub>2</sub>). <sup>1</sup>H NMR (500 MHz, CDCl<sub>3</sub>): δ 9.20 (s, 1H), 7.95 – 7.88 (m, 2H), 7.76 – 7.70 (d, *J* = 8.5 Hz, 2H), 7.56 – 7.49 (m, 1H), 7.47 – 7.37 (t, *J* = 7.0 Hz, 2H), 7.30 – 7.26 (d, *J* = 8.5 Hz, 2H), 7.19 – 7.12 (m, 5H), 5.72 – 5.59 (dd, *J* = 9.5, 7.0 Hz, 1H), 3.14 – 3.04 (dd, *J* = 14.0, 9.5 Hz, 1H), 2.97 – 2.89 (dd, *J* = 14.0, 7.0 Hz, 1H), 1.02 (s, 9H). <sup>13</sup>C NMR (CDCl<sub>3</sub>, 125 MHz): δ 179.1, 166.3, 161.6, 143.8, 137.0, 136.9, 133.5, 129.3, 129.2, 129.2, 128.5, 128.4, 127.9, 126.9, 125.0, 123.5, 120.7, 78.7, 37.8, 32.7, 25.0. IR (film)  $\nu_{\max}$  3034, 2970, 1820, 1681, 1648, 1595, 1527, 1492, 1298, 889, 692. HRMS (ESI, *m/z*) calcd for C<sub>29</sub>H<sub>28</sub>ClN<sub>2</sub>O<sub>3</sub><sup>+</sup> [M+H]<sup>+</sup>: 487.1783, found: 487.1781. The *ee* value was determined by the chiral HPLC analysis (CHIRALCEL OX-H, *n*-hexane/2-propanol = 90 : 10,  $\nu$  = 1.0 mL/min,  $\lambda$  = 254.0 nm;  $t_{\text{major}}$  = 9.5 min,  $t_{\text{minor}}$  = 12.2 min).

**(S, Z)-N-(4-bromophenyl)-4-(4-(tert-butyl)-5-oxo-2-phenyl-4,5-dihydrooxazol-4-yl)-2-phenylbut-2-enamide**

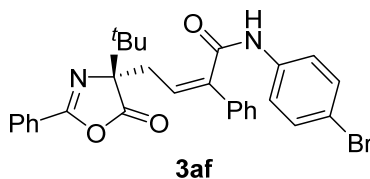

Colorless oil, 46.3 mg, 87%, 94% *ee*,  $[\alpha]_D^{25} = +104.0$  (*c* 0.5, CH<sub>2</sub>Cl<sub>2</sub>). <sup>1</sup>H NMR (500 MHz, CDCl<sub>3</sub>): δ 9.29 (s, 1H), 8.02 – 7.95 (m, 2H), 7.78 – 7.73 (dd, *J* = 8.5, 2.0 Hz, 2H), 7.63 – 7.58 (m, 1H), 7.53 – 7.47 (m, 4H), 7.27 – 7.19 (m, 5H), 5.78 – 5.68 (dd, *J* = 9.5, 7.5 Hz, 1H), 3.21 – 3.10 (dd, *J* = 13.5, 9.5 Hz, 1H), 3.04 – 2.97 (dd, *J* = 13.5, 7.5 Hz, 1H), 1.10 (s, 9H). <sup>13</sup>C NMR (CDCl<sub>3</sub>, 125 MHz): δ 179.0, 166.3, 161.6, 143.9, 137.5, 136.8, 133.5, 132.1, 129.2, 128.5, 128.4, 127.9, 126.9, 125.0, 123.5, 121.1, 117.0, 78.7, 37.8, 32.7, 25.0. IR (film)  $\nu_{\max}$  3033, 2970, 1820, 1681, 1648, 1526, 1488, 1298, 1019, 889. HRMS (ESI, *m/z*) calcd for C<sub>29</sub>H<sub>28</sub>BrN<sub>2</sub>O<sub>3</sub><sup>+</sup> [M+H]<sup>+</sup>: 531.1278, found: 531.1276. The *ee* value was determined by the chiral HPLC analysis (CHIRALCEL OX-H, *n*-hexane/2-propanol = 95 : 5,  $\nu$  = 1.0 mL/min,  $\lambda$  = 254.0 nm;  $t_{\text{major}}$  = 15.2 min,  $t_{\text{minor}}$  = 22.8 min).

**(S, Z)-4-(4-(tert-butyl)-5-oxo-2-phenyl-4,5-dihydrooxazol-4-yl)-2-phenyl-N-(4-(trifluoromethyl)phenyl)but-2-enamide**

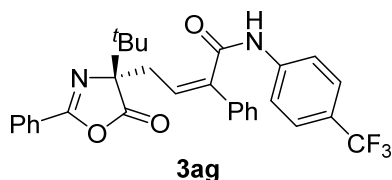

Colorless oil, 45.7 mg, 88%, 92% *ee*,  $[\alpha]_D^{25} = +104.0$  (*c* 0.5, CH<sub>2</sub>Cl<sub>2</sub>). <sup>1</sup>H NMR (500 MHz, CDCl<sub>3</sub>): δ 9.48 (s, 1H), 8.03 – 7.95 (m, 4H), 7.69 – 7.58 (m, 3H), 7.54 – 7.47 (t, *J* = 7.5 Hz, 2H), 7.27 – 7.20 (m, 5H), 5.80 – 5.72 (dd, *J* = 10.0, 7.5 Hz, 1H), 3.22 – 3.13 (dd, *J* = 13.5, 10.0 Hz, 1H), 3.07 – 2.98 (dd, *J* = 13.5, 7.5 Hz, 1H), 1.11 (s, 9H). <sup>13</sup>C NMR (CDCl<sub>3</sub>, 125 MHz): δ 179.0, 166.6, 161.7, 143.7, 141.4, 136.8, 133.5, 129.3, 128.6, 128.4, 127.9, 126.9, 126.4 (q, *J* = 3.6 Hz), 126.2 (q, *J* = 32.4 Hz), 125.0, 124.2 (q, *J* = 270.0 Hz), 123.8, 119.2, 78.7, 37.8, 32.7, 25.0. <sup>19</sup>F NMR (CDCl<sub>3</sub>, 470 MHz): δ –62.0. IR (film)  $\nu_{\max}$  2970, 1822, 1685, 1653, 1533, 1322, 1120, 1067, 1017, 692. HRMS (ESI, *m/z*) calcd for C<sub>30</sub>H<sub>28</sub>F<sub>3</sub>N<sub>2</sub>O<sub>3</sub><sup>+</sup> [M+H]<sup>+</sup>: 521.2047, found: 521.2044. The *ee* value was determined by the chiral HPLC analysis (CHIRALCEL OX-H, *n*-hexane/2-propanol = 95 : 5,  $\nu$  = 1.0 mL/min,  $\lambda$  = 254.0 nm;  $t_{\text{major}}$  = 8.7 min,  $t_{\text{minor}}$  = 10.9 min).

**(S, Z)-4-(4-(tert-butyl)-5-oxo-2-phenyl-4,5-dihydrooxazol-4-yl)-2-phenyl-N-(*m*-tolyl)but-2-enamide**

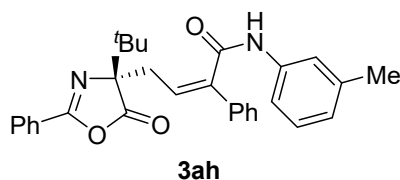

Colorless oil, 41.9 mg, 90%, 95% *ee*,  $[\alpha]_D^{25} = +88.0$  (*c* 0.5, CH<sub>2</sub>Cl<sub>2</sub>). <sup>1</sup>H NMR (500 MHz, CDCl<sub>3</sub>): δ 9.04 (s, 1H), 7.98 – 7.90 (m, 2H), 7.73 – 7.66 (t, *J* = 2.0 Hz, 1H), 7.55 – 7.45 (m, 2H), 7.45 – 7.38 (t, *J* = 7.0 Hz, 2H), 7.21 – 7.16 (m, 3H), 7.15 – 7.11 (m, 3H), 6.93 – 6.88 (d, *J* = 7.5 Hz, 1H), 5.68 – 5.60 (dd, *J* = 9.5, 7.0 Hz, 1H), 3.15 – 3.06 (dd, *J* = 13.5, 9.5 Hz, 1H), 2.98 – 2.89 (dd, *J* = 13.5, 7.0 Hz, 1H), 2.31 (s, 3H), 1.03 (s, 9H). <sup>13</sup>C NMR (CDCl<sub>3</sub>, 125 MHz): δ 179.1, 166.3, 161.4, 144.0, 139.1, 138.3, 137.0, 133.4, 129.2, 128.9, 128.5, 128.2, 127.9, 126.9, 125.2, 125.1, 123.2, 120.3, 116.6, 78.8, 37.8, 32.7, 25.0, 21.7. IR (film)  $\nu_{\max}$  2967, 1820, 1683, 1653, 1541, 1489, 1294, 1260, 1019, 888, 764, 750. HRMS (ESI, *m/z*) calcd for C<sub>30</sub>H<sub>31</sub>N<sub>2</sub>O<sub>3</sub><sup>+</sup> [M+H]<sup>+</sup>: 467.2329, found: 467.2326. The *ee* value was determined by the chiral HPLC analysis (CHIRALCEL OX-H, *n*-hexane/2-propanol = 90 : 10,  $\nu$  = 1.0 mL/min,  $\lambda$  = 254.0 nm;  $t_{\text{major}}$  = 10.4 min,  $t_{\text{minor}}$  = 15.4 min).

**(S, Z)-4-(4-(tert-butyl)-5-oxo-2-phenyl-4,5-dihydrooxazol-4-yl)-2-phenyl-N-(p-tolyl)but-2-enamide**

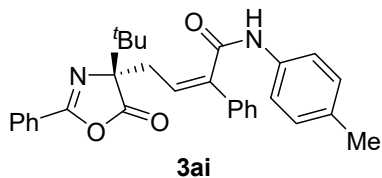

White solid, 41.4 mg, 89%, Mp: 150 – 152 °C, 94% *ee*,  $[\alpha]_D^{25} = +136.0$  (*c* 0.5, CH<sub>2</sub>Cl<sub>2</sub>). <sup>1</sup>H NMR (500 MHz, CDCl<sub>3</sub>): δ 9.14 (s, 1H), 8.05 – 7.95 (m, 2H), 7.77 – 7.69 (d, *J* = 8.5 Hz, 2H), 7.62 – 7.56 (m, 1H), 7.52 – 7.45 (t, *J* = 7.5 Hz, 2H), 7.29 – 7.25 (m, 2H), 7.23 – 7.17 (m, 5H), 5.75 – 5.67 (dd, *J* = 10.0, 7.5 Hz, 1H), 3.24 – 3.15 (dd, *J* = 14.0, 10.0 Hz, 1H), 3.04 – 2.96 (dd, *J* = 14.0, 7.5 Hz, 1H), 2.35 (s, 3H), 1.11 (s, 9H). <sup>13</sup>C NMR (CDCl<sub>3</sub>, 125 MHz): δ 179.1, 166.1, 161.4, 144.08, 137.1, 135.8, 134.0, 133.4, 129.6, 129.2, 128.5, 128.2, 127.9, 126.9, 125.1, 123.0, 119.5, 78.7, 37.8, 32.7, 25.0, 21.0. IR (film)  $\nu_{\max}$  2972, 1820, 1772, 1676, 1653, 1540, 1521, 1295, 1276, 1260, 764. HRMS (ESI, *m/z*) calcd for C<sub>30</sub>H<sub>31</sub>N<sub>2</sub>O<sub>3</sub><sup>+</sup> [M+H]<sup>+</sup>: 467.2329, found: 467.2327. The *ee* value was determined by the chiral HPLC analysis (CHIRALCEL OX-H, *n*-hexane/2-propanol = 80 : 20,  $\nu$  = 1.0 mL/min,  $\lambda$  = 254.0 nm;  $t_{\text{major}}$  = 8.3 min,  $t_{\text{minor}}$  = 14.3 min).

**(S, Z)-4-(4-(tert-butyl)-5-oxo-2-phenyl-4,5-dihydrooxazol-4-yl)-N-(3-methoxyphenyl)-2-phenylbut-2-enamide**

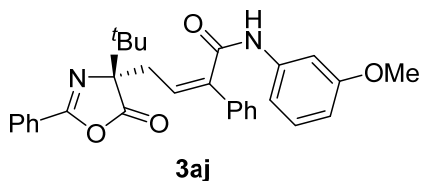

Colorless oil, 42.3 mg, 88%, 94% *ee*,  $[\alpha]_D^{25} = +96.0$  (*c* 0.5, CH<sub>2</sub>Cl<sub>2</sub>). <sup>1</sup>H NMR (500 MHz, CDCl<sub>3</sub>): δ 9.18 (s, 1H), 7.97 – 7.87 (m, 2H), 7.62 – 7.56 (t, *J* = 2.5 Hz, 1H), 7.54 – 7.49 (m, 1H), 7.44 – 7.38 (m, 2H), 7.25 – 7.11 (m, 7H), 6.69 – 6.61 (m, 1H), 5.70 – 5.60 (dd, *J* = 10.0, 7.5 Hz, 1H), 3.76 (s, 3H), 3.18 – 3.07 (dd, *J* = 13.5, 10.0 Hz, 1H), 2.97 – 2.88 (dd, *J* = 13.5, 7.5 Hz, 1H), 1.04 (s, 9H). <sup>13</sup>C NMR (CDCl<sub>3</sub>, 125 MHz): δ 179.0, 166.3, 161.5, 160.3, 144.1, 139.6, 137.1, 133.4, 129.8, 129.2, 128.5, 128.3, 127.9, 126.9, 125.0, 123.3, 111.7, 110.5, 105.2, 78.7, 55.4, 37.8, 32.7, 25.0. IR (film)  $\nu_{\max}$  2967, 1820, 1672, 1600, 1244, 1064, 965, 752, 693. HRMS (ESI, *m/z*) calcd for C<sub>30</sub>H<sub>31</sub>N<sub>2</sub>O<sub>4</sub><sup>+</sup> [M+H]<sup>+</sup>: 483.2278, found: 483.2277. The *ee* value was determined by the chiral HPLC analysis (CHIRALCEL OX-H, *n*-hexane/2-propanol = 85 : 15,  $\nu$  = 1.0 mL/min,  $\lambda$  = 254.0 nm;  $t_{\text{major}}$  = 10.2 min,  $t_{\text{minor}}$  = 15.5 min).



**(S, Z)-4-(4-(tert-butyl)-5-oxo-2-phenyl-4,5-dihydrooxazol-4-yl)-N-(4-methoxyphenyl)-2-phenylbut-2-enamide**

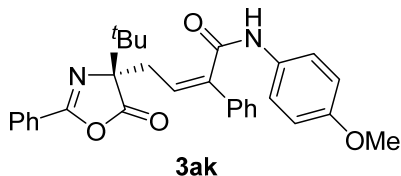

White solid, 44.2 mg, 92%, Mp: 106 – 108 °C, 95% *ee*,  $[\alpha]_D^{25} = +112.0$  (*c* 0.5, CH<sub>2</sub>Cl<sub>2</sub>). <sup>1</sup>H NMR (500 MHz, CDCl<sub>3</sub>): δ 9.01 (s, 1H), 7.97 – 7.88 (d, *J* = 7.0 Hz, 2H), 7.73 – 7.64 (m, 2H), 7.56 – 7.48 (m, 1H), 7.45 – 7.38 (m, 2H), 7.22 – 7.18 (m, 2H), 7.16 – 7.11 (m, 3H), 6.88 – 6.84 (m, 2H), 5.69 – 5.59 (dd, *J* = 10.0, 7.5 Hz, 1H), 3.75 (s, 3H), 3.16 – 3.06 (dd, *J* = 14.0, 10.0 Hz, 1H), 2.99 – 2.87 (dd, *J* = 14.0, 7.5 Hz, 1H), 1.03 (s, 9H). <sup>13</sup>C NMR (CDCl<sub>3</sub>, 125 MHz): δ 179.1, 165.9, 161.4, 156.4, 144.1, 137.1, 133.4, 131.6, 129.2, 128.5, 128.2, 127.9, 125.1, 123.1, 121.1, 114.3, 78.8, 55.5, 37.8, 32.7, 25.0. IR (film)  $\nu_{\max}$  2966, 1819, 1671, 1652, 1510, 1465, 1245, 1178, 889, 830. HRMS (ESI, *m/z*) calcd for C<sub>30</sub>H<sub>31</sub>N<sub>2</sub>O<sub>4</sub><sup>+</sup> [M+H]<sup>+</sup>: 483.2278, found: 483.2279. The *ee* value was determined by the chiral HPLC analysis (CHIRALCEL OX-H, *n*-hexane/2-propanol = 80 : 20,  $\nu$  = 1.0 mL/min,  $\lambda$  = 254.0 nm;  $t_{\text{major}}$  = 12.2 min,  $t_{\text{minor}}$  = 23.2 min).

**(S, Z)-4-(4-(tert-butyl)-5-oxo-2-phenyl-4,5-dihydrooxazol-4-yl)-2-phenyl-N-(4-(trifluoromethoxy)phenyl)but-2-enamide**

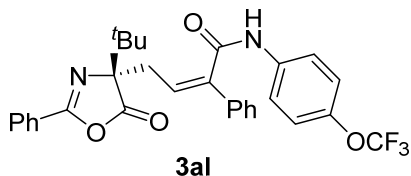

Colorless oil, 48.9 mg, 91%, 95% *ee*,  $[\alpha]_D^{25} = +96.0$  (*c* 0.5, CH<sub>2</sub>Cl<sub>2</sub>). <sup>1</sup>H NMR (500 MHz, CDCl<sub>3</sub>): δ 9.32 (s, 1H), 8.03 – 7.95 (dd, *J* = 8.0, 1.0 Hz, 2H), 7.93 – 7.85 (d, *J* = 9.0 Hz, 2H), 7.63 – 7.57 (m, 1H), 7.53 – 7.46 (m, 2H), 7.28 – 7.20 (m, 7H), 5.79 – 5.72 (dd, *J* = 9.5, 7.0 Hz, 1H), 3.22 – 3.13 (dd, *J* = 13.5, 9.5 Hz, 1H), 3.07 – 2.98 (dd, *J* = 13.5, 7.0 Hz, 1H), 1.11 (s, 9H). <sup>13</sup>C NMR (CDCl<sub>3</sub>, 125 MHz): δ 179.1, 166.4, 161.6, 145.4, 143.8, 137.0, 136.8, 133.5, 129.2, 128.5, 128.4, 127.9, 126.9, 125.0, 123.6, 121.9, 120.6, 120.5 (q, *J* = 256.0 Hz), 78.8, 37.8, 32.7, 25.0. <sup>19</sup>F NMR (CDCl<sub>3</sub>, 470 MHz): δ –58.0. IR (film)  $\nu_{\max}$  3060, 2970, 1821, 1683, 1653, 1539, 1508, 1263, 1202, 1019, 889, 692. HRMS (ESI, *m/z*) calcd for C<sub>30</sub>H<sub>28</sub>F<sub>3</sub>N<sub>2</sub>O<sub>4</sub><sup>+</sup> [M+H]<sup>+</sup>: 537.1996, found: 537.1996. The *ee* value was determined by the chiral HPLC analysis (CHIRALCEL OX-H, *n*-hexane/2-propanol = 95 : 5,  $\nu$  = 1.0 mL/min,  $\lambda$  = 254.0 nm;  $t_{\text{major}}$  = 9.4 min,  $t_{\text{minor}}$  = 11.9 min).

**(S, Z)-4-(4-(tert-butyl)-5-oxo-2-phenyl-4,5-dihydrooxazol-4-yl)-2-(2-fluorophenyl)-N-(4-methoxyphenyl)but-2-enamide**

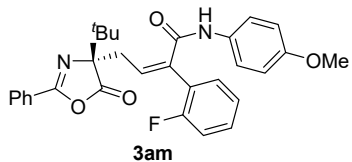

Colorless oil, 44.2 mg, 88%, 96% *ee*,  $[\alpha]_D^{25} = +192.0$  (*c* 0.5, CH<sub>2</sub>Cl<sub>2</sub>). <sup>1</sup>H NMR (500 MHz, CDCl<sub>3</sub>): δ 9.39 (s, 1H), 7.95 – 7.88 (dd, *J* = 8.0, 1.0 Hz, 2H), 7.72 – 7.66 (m, 2H), 7.55 – 7.49 (m, 1H), 7.45 – 7.38 (m, 2H), 7.27 – 7.21 (m, 1H), 7.14 – 7.07 (m, 1H), 6.98 – 6.93 (m, 1H), 6.88 – 6.83 (m, 2H), 6.81 – 6.76 (m, 1H), 5.71 – 5.62 (dd, *J* = 10.5, 7.0 Hz, 1H), 3.74 (s, 3H), 3.29 – 3.17 (dd, *J* = 13.5, 10.5 Hz, 1H), 2.98 – 2.87 (dd, *J* = 13.5, 7.0 Hz, 1H), 1.04 (s, 9H). <sup>13</sup>C NMR (CDCl<sub>3</sub>, 125 MHz): δ 178.8, 165.0, 161.9, 159.6 (d, *J* = 247.1 Hz), 156.3, 138.8, 133.4, 131.8, 130.6 (d, *J* = 2.9 Hz), 129.8 (d, *J* = 8.4 Hz), 129.1, 128.0, 127.2 (d, *J* = 2.5 Hz), 126.0 (d, *J* = 13.5 Hz), 125.1, 124.1 (d, *J* = 3.5 Hz), 121.0, 115.6 (d, *J* = 21.9 Hz), 114.3, 78.4, 55.5, 37.8, 32.7, 25.0. <sup>19</sup>F NMR (CDCl<sub>3</sub>, 470 MHz): δ –114.3. IR (film)  $\nu_{\max}$  3062, 2961, 1820, 1671, 1652, 1540, 1510, 1297, 1245, 1020, 964. HRMS (ESI, *m/z*) calcd for C<sub>30</sub>H<sub>30</sub>FN<sub>2</sub>O<sub>4</sub><sup>+</sup> [M+H]<sup>+</sup>: 501.2184, found: 501.2184. The *ee* value was determined by the chiral HPLC analysis (CHIRALCEL OX-H, *n*-hexane/2-propanol = 70 : 30,  $\nu$  = 1.0 mL/min,  $\lambda$  = 254.0 nm; *t*<sub>major</sub> = 8.9 min, *t*<sub>minor</sub> = 17.1 min).

**(S, Z)-4-(4-(tert-butyl)-5-oxo-2-phenyl-4,5-dihydrooxazol-4-yl)-2-(4-fluorophenyl)-N-(4-methoxyphenyl)but-2-enamide**

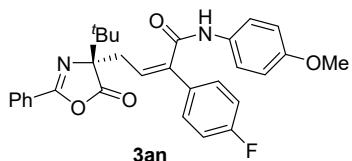

Colorless oil, 45.7 mg, 91%, 96% *ee*,  $[\alpha]_D^{25} = +128.0$  (*c* 0.5, CH<sub>2</sub>Cl<sub>2</sub>). <sup>1</sup>H NMR (500 MHz, CDCl<sub>3</sub>): δ 9.20 (s, 1H), 8.03 – 7.97 (dd, *J* = 8.0, 1.0 Hz, 2H), 7.79 – 7.73 (m, 2H), 7.64 – 7.57 (m, 1H), 7.53 – 7.46 (m, 2H), 7.28 – 7.21 (m, 2H), 6.97 – 6.85 (m, 4H), 5.71 – 5.61 (dd, *J* = 10.0, 7.0 Hz, 1H), 3.83 (s, 3H), 3.24 – 3.14 (dd, *J* = 13.5, 10.0 Hz, 1H), 3.04 – 2.94 (dd, *J* = 13.5, 7.0 Hz, 1H), 1.11 (s, 9H). <sup>13</sup>C NMR (CDCl<sub>3</sub>, 125 MHz): δ 179.0, 165.7, 162.7 (d, *J* = 246.5 Hz), 161.5, 156.5, 143.1, 133.5, 133.2 (d, *J* = 3.4 Hz), 131.5, 129.2, 128.7 (d, *J* = 8.0 Hz), 127.9, 125.0, 122.9, 121.1, 115.4 (d, *J* = 21.6 Hz), 114.3, 78.7, 55.5, 37.8, 32.7, 25.0. <sup>19</sup>F NMR (CDCl<sub>3</sub>, 470 MHz): δ –113.6. IR (film)  $\nu_{\max}$  2961, 1820, 1671, 1653, 1601, 1508, 1296, 1235, 1019, 833, 765. HRMS (ESI, *m/z*) calcd for C<sub>30</sub>H<sub>30</sub>FN<sub>2</sub>O<sub>4</sub><sup>+</sup> [M+H]<sup>+</sup>: 501.2184, found: 501.2184. The *ee* value was determined by the chiral HPLC analysis (CHIRALCEL OX-H, *n*-hexane/2-propanol = 80 : 20,  $\nu$  = 1.0 mL/min,  $\lambda$  = 254.0 nm; *t*<sub>major</sub> = 8.4 min, *t*<sub>minor</sub> = 11.4 min).

**(S, Z)-4-(4-(tert-butyl)-5-oxo-2-phenyl-4,5-dihydrooxazol-4-yl)-2-(4-chlorophenyl)-N-(4-methoxyphenyl)but-2-enamide**

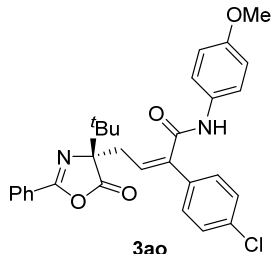

Colorless oil, 46.9 mg, 91%, 97% *ee*,  $[\alpha]_D^{25} = +88.0$  (*c* 0.5, CH<sub>2</sub>Cl<sub>2</sub>). <sup>1</sup>H NMR (500 MHz, CDCl<sub>3</sub>): δ 9.21 (s, 1H), 8.03 – 7.96 (m, 2H), 7.80 – 7.71 (m, 2H), 7.64 – 7.55 (m, 1H), 7.54 – 7.46 (m, 2H), 7.21 – 7.13 (m, 4H), 6.97 – 6.90 (m, 2H), 5.74 – 5.66 (dd, *J* = 10.0, 7.0 Hz, 1H), 3.82 (s, 3H), 3.23 – 3.13 (dd, *J* = 13.5, 10.0 Hz, 1H), 3.04 – 2.94 (dd, *J* = 13.5, 7.0 Hz, 1H), 1.10 (s, 9H). <sup>13</sup>C NMR (CDCl<sub>3</sub>, 125 MHz): δ 179.0, 165.4, 161.5, 156.5, 143.0, 135.6, 134.2, 133.5, 131.5, 129.3, 128.6, 128.2, 127.8, 125.0, 123.5, 121.1, 114.3, 78.7, 55.5, 37.8, 32.8, 25.0. IR (film)  $\nu_{\max}$  2966, 1820, 1670, 1653, 1540, 1510, 1492, 1246, 1018, 830, 765. HRMS (ESI, *m/z*) calcd for C<sub>30</sub>H<sub>30</sub>ClN<sub>2</sub>O<sub>4</sub><sup>+</sup> [M+H]<sup>+</sup>: 517.1889, found: 517.1889. The *ee* value was determined by the chiral HPLC analysis (CHIRALCEL OX-H, *n*-hexane/2-propanol = 85 : 15,  $\nu$  = 1.0 mL/min,  $\lambda$  = 254.0 nm;  $t_{\text{major}}$  = 11.9 min,  $t_{\text{minor}}$  = 15.9 min).

**(S, Z)-2-(3-bromophenyl)-4-(4-(tert-butyl)-5-oxo-2-phenyl-4,5-dihydrooxazol-4-yl)-N-(4-methoxyphenyl)but-2-enamide**

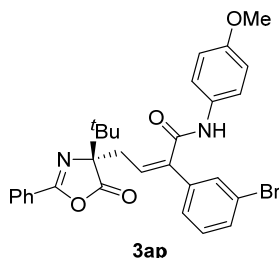

Colorless oil, 54.5 mg, 97%, 97% *ee*,  $[\alpha]_D^{25} = +80.0$  (*c* 0.5, CH<sub>2</sub>Cl<sub>2</sub>). <sup>1</sup>H NMR (500 MHz, CDCl<sub>3</sub>): δ 9.23 (s, 1H), 8.04 – 7.98 (dd, *J* = 8.0, 1.5 Hz, 2H), 7.79 – 7.73 (d, *J* = 9.0 Hz, 2H), 7.64 – 7.58 (m, 1H), 7.54 – 7.48 (m, 2H), 7.40 – 7.36 (t, *J* = 1.5 Hz, 1H), 7.35 – 7.30 (m, 1H), 7.22 – 7.17 (m, 1H), 7.09 – 7.04 (t, *J* = 8.0 Hz, 1H), 6.97 – 6.91 (m, 2H), 5.73 – 5.67 (dd, *J* = 10.0, 7.0 Hz, 1H), 3.83 (s, 3H), 3.23 – 3.14 (dd, *J* = 13.5, 10.0 Hz, 1H), 3.03 – 2.95 (dd, *J* = 13.5, 7.0 Hz, 1H), 1.11 (s, 9H). <sup>13</sup>C NMR (CDCl<sub>3</sub>, 125 MHz): δ 178.9, 165.2, 161.6, 156.5, 142.9, 139.2, 133.5, 131.4, 131.2, 130.0, 129.9, 129.3, 127.9, 125.6, 124.9, 124.3, 122.5, 121.1, 114.3, 78.6, 55.5, 37.8, 32.8, 25.0. IR (film)  $\nu_{\max}$  3061, 2960, 1820, 1671, 1653, 1539, 1510, 1245, 1019, 830, 692. HRMS (ESI, *m/z*) calcd for C<sub>30</sub>H<sub>30</sub>BrN<sub>2</sub>O<sub>4</sub><sup>+</sup> [M+H]<sup>+</sup>: 561.1383, found: 561.1381. The *ee* value was determined by the chiral HPLC analysis (CHIRALCEL OX-H, *n*-hexane/2-propanol = 70 : 30,  $\nu$  = 1.0 mL/min,  $\lambda$  = 254.0 nm;  $t_{\text{major}}$  = 7.7 min,  $t_{\text{minor}}$  = 16.0 min).

**(S, Z)-2-(4-bromophenyl)-4-(4-(tert-butyl)-5-oxo-2-phenyl-4,5-dihydrooxazol-4-yl)-N-(4-methoxyphenyl)but-2-enamide**

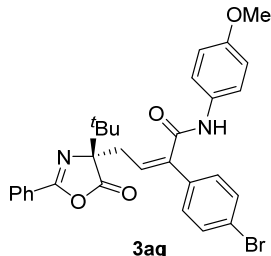

Colorless oil, 53.8 mg, 96%, 97% *ee*,  $[\alpha]_D^{25} = +80.0$  (*c* 0.5, CH<sub>2</sub>Cl<sub>2</sub>). <sup>1</sup>H NMR (500 MHz, CDCl<sub>3</sub>): δ 9.13 (s, 1H), 7.94 – 7.88 (m, 2H), 7.71 – 7.64 (d, *J* = 9.0 Hz, 2H), 7.55 – 7.49 (m, 1H), 7.45 – 7.38 (t, *J* = 7.0 Hz, 2H), 7.26 – 7.21 (m, 2H), 7.07 – 7.03 (m, 2H), 6.88 – 6.83 (m, 2H), 5.67 – 5.58 (dd, *J* = 10.0, 7.0 Hz, 1H), 3.74 (s, 3H), 3.16 – 3.05 (dd, *J* = 13.5, 10.0 Hz, 1H), 2.96 – 2.84 (dd, *J* = 13.5, 7.0 Hz, 1H), 1.02 (s, 9H). <sup>13</sup>C NMR (CDCl<sub>3</sub>, 125 MHz): δ 179.0, 165.4, 161.5, 156.5, 143.1, 136.0, 133.5, 131.5, 129.3, 128.5, 127.8, 124.9, 123.5, 122.4, 121.1, 114.3, 78.6, 55.5, 37.8, 32.8, 25.0. IR (film)  $\nu_{\max}$  2961, 1820, 1671, 1652, 1539, 1510, 1489, 1296, 1245, 1010, 829. HRMS (ESI, *m/z*) calcd for C<sub>30</sub>H<sub>30</sub>BrN<sub>2</sub>O<sub>4</sub><sup>+</sup> [M+H]<sup>+</sup>: 561.1383, found: 561.1381. The *ee* value was determined by the chiral HPLC analysis (CHIRALCEL OX-H, *n*-hexane/2-propanol = 85 : 15,  $\nu$  = 1.0 mL/min,  $\lambda$  = 254.0 nm;  $t_{\text{major}}$  = 12.7 min,  $t_{\text{minor}}$  = 17.1 min).

**(S, Z)-4-(4-(tert-butyl)-5-oxo-2-phenyl-4,5-dihydrooxazol-4-yl)-N-(4-methoxyphenyl)-2-(p-tolyl)but-2-enamide**

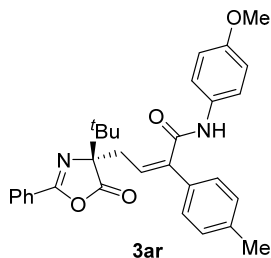

Colorless oil, 45.8 mg, 92%, 95% *ee*,  $[\alpha]_D^{25} = +120.0$  (*c* 0.5, CH<sub>2</sub>Cl<sub>2</sub>). <sup>1</sup>H NMR (500 MHz, CDCl<sub>3</sub>): δ 9.04 (s, 1H), 8.04 – 7.95 (dd, *J* = 8.0, 1.0 Hz, 2H), 7.79 – 7.72 (m, 2H), 7.62 – 7.55 (m, 1H), 7.51 – 7.45 (t, *J* = 7.5 Hz, 2H), 7.19 – 7.15 (m, 2H), 7.04 – 6.99 (d, *J* = 8.0 Hz, 2H), 6.96 – 6.90 (m, 2H), 5.73 – 5.63 (dd, *J* = 9.5, 7.0 Hz, 1H), 3.82 (s, 3H), 3.24 – 3.13 (dd, *J* = 13.5, 9.5 Hz, 1H), 3.04 – 2.94 (dd, *J* = 13.5, 7.0 Hz, 1H), 2.26 (s, 3H), 1.10 (s, 9H). <sup>13</sup>C NMR (CDCl<sub>3</sub>, 125 MHz): δ 179.2, 166.1, 161.3, 156.4, 143.9, 138.2, 134.2, 133.3, 131.6, 129.2, 127.9, 126.8, 125.1, 122.2, 121.1, 114.3, 78.8, 55.5, 37.8, 32.7, 25.0, 21.1. IR (film)  $\nu_{\max}$  2960, 1820, 1671, 1653, 1510, 1246, 1035, 1019, 889, 829. HRMS (ESI, *m/z*) calcd for C<sub>31</sub>H<sub>33</sub>N<sub>2</sub>O<sub>4</sub><sup>+</sup> [M+H]<sup>+</sup>: 497.2435, found: 497.2434. The *ee* value was determined by the chiral HPLC analysis (CHIRALCEL OX-H, *n*-hexane/2-propanol = 70 : 30,  $\nu$  = 1.0 mL/min,  $\lambda$  = 254.0 nm;  $t_{\text{major}}$  = 8.5 min,  $t_{\text{minor}}$  = 14.6 min).

**(S, Z)-4-(4-(tert-butyl)-5-oxo-2-phenyl-4,5-dihydrooxazol-4-yl)-N,2-bis(4-methoxyphenyl)but-2-enamide**

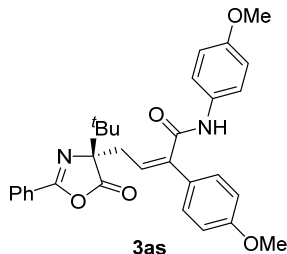

Colorless oil, 43.4 mg, 85%, 96% *ee*,  $[\alpha]_D^{25} = +72.0$  (*c* 0.5, CH<sub>2</sub>Cl<sub>2</sub>). <sup>1</sup>H NMR (500 MHz, CDCl<sub>3</sub>): δ 9.04 (s, 1H), 8.04 – 7.96 (m, 2H), 7.80 – 7.71 (m, 2H), 7.64 – 7.54 (m, 1H), 7.52 – 7.45 (m, 2H), 7.23 – 7.19 (m, 2H), 6.96 – 6.91 (m, 2H), 6.76 – 6.71 (m, 2H), 5.69 – 5.58 (dd, *J* = 9.5, 7.0 Hz, 1H), 3.82 (s, 3H), 3.73 (s, 3H), 3.21 – 3.12 (dd, *J* = 14.0, 9.5 Hz, 1H), 3.04 – 2.94 (dd, *J* = 14.0, 7.0 Hz, 1H), 1.10 (s, 9H). <sup>13</sup>C NMR (CDCl<sub>3</sub>, 125 MHz): δ 179.2, 166.2, 161.3, 159.7, 156.4, 143.5, 133.3, 131.6, 129.5, 129.2, 128.1, 127.9, 125.1, 121.2, 121.1, 114.3, 113.8, 78.8, 55.5, 55.3, 37.8, 32.7, 25.0. IR (film)  $\nu_{\max}$  2959, 1819, 1653, 1603, 1508, 1294, 1246, 1176, 1034, 965, 830. HRMS (ESI, *m/z*) calcd for C<sub>31</sub>H<sub>33</sub>N<sub>2</sub>O<sub>5</sub><sup>+</sup> [M+H]<sup>+</sup>: 513.2384, found: 513.2385. The *ee* value was determined by the chiral HPLC analysis (CHIRALCEL OD-H, *n*-hexane/2-propanol = 93 : 7,  $\nu$  = 1.0 mL/min,  $\lambda$  = 254.0 nm;  $t_{\text{major}}$  = 21.3 min,  $t_{\text{minor}}$  = 27.1 min).

**(S, Z)-4-(4-(tert-butyl)-5-oxo-2-phenyl-4,5-dihydrooxazol-4-yl)-N-(4-methoxyphenyl)-2-(naphthalen-2-yl)but-2-enamide**

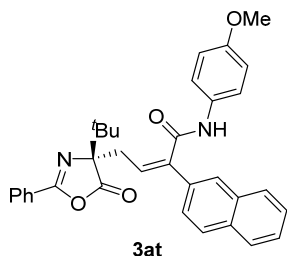

White solid, 47.5 mg, 89%, Mp: 151 – 153 °C, 96% *ee*,  $[\alpha]_D^{25} = +80.0$  (*c* 0.5, CH<sub>2</sub>Cl<sub>2</sub>). <sup>1</sup>H NMR (500 MHz, CDCl<sub>3</sub>): δ 9.14 (s, 1H), 8.04 – 7.98 (m, 2H), 7.82 – 7.78 (m, 2H), 7.75 – 7.69 (m, 2H), 7.69 – 7.64 (m, 2H), 7.59 – 7.54 (m, 1H), 7.50 – 7.45 (t, *J* = 7.5 Hz, 2H), 7.42 – 7.35 (m, 3H), 6.99 – 6.91 (m, 2H), 5.89 – 5.82 (dd, *J* = 9.5, 7.0 Hz, 1H), 3.83 (s, 3H), 3.29 – 3.20 (dd, *J* = 13.5, 9.5 Hz, 1H), 3.11 – 3.02 (dd, *J* = 13.5, 7.0 Hz, 1H), 1.12 (s, 9H). <sup>13</sup>C NMR (CDCl<sub>3</sub>, 125 MHz): δ 179.2, 166.0, 161.4, 156.5, 144.0, 134.3, 133.4, 133.2, 133.0, 131.6, 129.2, 128.3, 128.1, 127.9, 127.5, 126.3, 126.3, 125.1, 124.5, 123.4, 114.3, 78.8, 55.5, 37.8, 32.9, 25.1. IR (film)  $\nu_{\max}$  2971, 1820, 1670, 1653, 1540, 1510, 1275, 1246, 1171, 1035, 963, 888. HRMS (ESI, *m/z*) calcd for C<sub>34</sub>H<sub>33</sub>N<sub>2</sub>O<sub>4</sub><sup>+</sup> [M+H]<sup>+</sup>: 533.2435, found: 533.2433. The *ee* value was determined by the chiral HPLC analysis (CHIRALCEL OX-H, *n*-hexane/2-propanol = 50 : 50,  $\nu$  = 1.0 mL/min,  $\lambda$  = 254.0 nm;  $t_{\text{major}}$  = 10.4 min,  $t_{\text{minor}}$  = 18.7 min).

**(S, Z)-4-(4-(tert-butyl)-5-oxo-2-phenyl-4,5-dihydrooxazol-4-yl)-N-(4-methoxyphenyl)-2-(thiophen-3-yl)but-2-enamide**

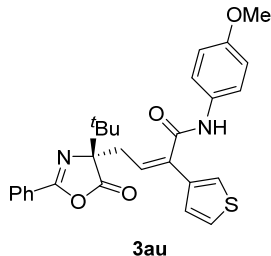

Colorless oil, 45.6 mg, 93%, 93% *ee*,  $[\alpha]_D^{25} = +72.0$  (*c* 0.5, CH<sub>2</sub>Cl<sub>2</sub>). <sup>1</sup>H NMR (500 MHz, CDCl<sub>3</sub>): δ 9.07(s, 1H), 8.02 – 7.96 (m, 2H), 7.78 – 7.72 (m, 2H), 7.62 – 7.56 (m, 1H), 7.52 – 7.47 (m, 2H), 7.31 – 7.28 (dd, *J* = 3.0, 1.5 Hz, 1H), 7.17 – 7.13 (dd, *J* = 5.0, 3.0 Hz, 1H), 7.02 – 6.99 (dd, *J* = 5.0, 1.0 Hz, 1H), 6.96 – 6.92 (m, 2H), 5.79 – 5.71 (dd, *J* = 10.0, 7.5 Hz, 1H), 3.82 (s, 3H), 3.22 – 3.11 (dd, *J* = 13.5, 10.0 Hz, 1H), 3.03 – 2.94 (dd, *J* = 13.5, 7.5 Hz, 1H), 1.10 (s, 9H). <sup>13</sup>C NMR (CDCl<sub>3</sub>, 125 MHz): δ 179.2, 165.5, 161.4, 156.4, 138.9, 137.6, 133.4, 131.5, 129.2, 127.9, 125.8, 125.7, 125.0, 123.0, 121.4, 121.2, 114.3, 78.8, 55.5, 37.8, 32.5, 25.0. IR (film)  $\nu_{\max}$  2965, 1819, 1670, 1653, 1510, 1295, 1246, 1019, 830, 764, 750. HRMS (ESI, *m/z*) calcd for C<sub>28</sub>H<sub>29</sub>N<sub>2</sub>O<sub>4</sub>S<sup>+</sup> [M+H]<sup>+</sup>: 489.1843, found: 489.1842. The *ee* value was determined by the chiral HPLC analysis (CHIRALCEL OX-H, *n*-hexane/2-propanol = 70 : 30,  $\nu$  = 1.0 mL/min,  $\lambda$  = 254.0 nm;  $t_{\text{major}}$  = 13.9 min,  $t_{\text{minor}}$  = 18.3 min).

**(S, Z)-4-(4-(tert-butyl)-5-oxo-2-phenyl-4,5-dihydrooxazol-4-yl)-N-(4-methoxyphenyl)-2-methylbut-2-enamide**

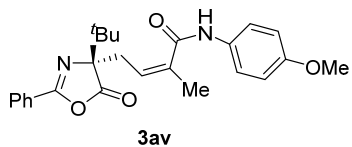

Colorless oil, 26.7 mg, 64%, 90% *ee*,  $[\alpha]_D^{25} = +304.0$  (*c* 0.5, CH<sub>2</sub>Cl<sub>2</sub>). <sup>1</sup>H NMR (500 MHz, CDCl<sub>3</sub>): δ 9.31(s, 1H), 8.04 – 7.96 (m, 2H), 7.79 – 7.71 (m, 2H), 7.65 – 7.59 (m, 1H), 7.55 – 7.47 (t, *J* = 7.0 Hz, 2H), 6.95 – 6.89 (m, 2H), 5.35 – 5.23 (dd, *J* = 10.5, 7.0 Hz, 1H), 3.82 (s, 3H), 3.13 – 3.03 (dd, *J* = 13.5, 10.5 Hz, 1H), 2.82 – 2.74 (dd, *J* = 13.5, 7.0 Hz, 1H), 1.84 (s, 3H), 1.09 (s, 9H). <sup>13</sup>C NMR (CDCl<sub>3</sub>, 125 MHz): δ 178.9, 166.8, 161.5, 156.2, 140.0, 133.4, 131.9, 129.2, 127.9, 125.1, 122.0, 120.8, 114.2, 78.5, 55.5, 37.6, 32.2, 25.0, 21.1. IR (film)  $\nu_{\max}$  2959, 1820, 1671, 1648, 1540, 1510, 1298, 1245, 884, 750. HRMS (ESI, *m/z*) calcd for C<sub>25</sub>H<sub>29</sub>N<sub>2</sub>O<sub>4</sub><sup>+</sup> [M+H]<sup>+</sup>: 421.2122, found: 421.2120. The *ee* value was determined by the chiral HPLC analysis (CHIRALCEL OX-H, *n*-hexane/2-propanol = 80 : 20,  $\nu$  = 1.0 mL/min,  $\lambda$  = 254.0 nm;  $t_{\text{major}}$  = 9.4 min,  $t_{\text{minor}}$  = 15.1 min).

**(S, Z)-4-(4-(tert-butyl)-2-(2-fluorophenyl)-5-oxo-4,5-dihydrooxazol-4-yl)-N-(4-methoxyphenyl)-2-phenylbut-2-enamide**

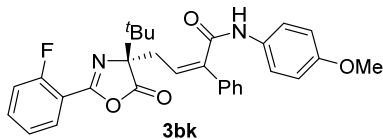

White solid, 39.2 mg, 78%, Mp: 90 – 92 °C, 92% *ee*,  $[\alpha]_D^{25} = +136.0$  (*c* 0.5, CH<sub>2</sub>Cl<sub>2</sub>). <sup>1</sup>H NMR (500 MHz, CDCl<sub>3</sub>): δ 9.24 (s, 1H), 7.88 – 7.81 (m, 1H), 7.80 – 7.74 (m, 2H), 7.56 – 7.51 (m, 1H), 7.34 – 7.20 (m, 7H), 6.94 – 6.88 (m, 2H), 5.77 – 5.66 (dd, *J* = 11.0, 6.0 Hz, 1H), 3.81 (s, 3H), 3.31 – 3.20 (dd, *J* = 13.5, 11.0 Hz, 1H), 2.98 – 2.89 (dd, *J* = 13.5, 6.0 Hz, 1H), 1.09 (s, 9H). <sup>13</sup>C NMR (CDCl<sub>3</sub>, 125 MHz): δ 178.3, 166.0, 161.5 (d, *J* = 260.1 Hz), 157.5 (d, *J* = 6.2 Hz), 156.3, 144.5, 137.1, 134.8 (d, *J* = 9.1 Hz), 131.7, 130.7, 128.5, 128.2, 126.8, 124.8 (d, *J* = 3.8 Hz), 122.2, 121.1 (d, *J* = 2.1 Hz), 117.3 (d, *J* = 21.3 Hz), 114.1, 113.6 (d, *J* = 9.5 Hz), 78.0, 55.5, 37.8, 33.1, 24.9. <sup>19</sup>F NMR (CDCl<sub>3</sub>, 470 MHz): δ –108.7. IR (film)  $\nu_{\max}$  2965, 1820, 1670, 1653, 1540, 1511, 1496, 1246, 1021, 964, 890. HRMS (ESI, *m/z*) calcd for C<sub>30</sub>H<sub>30</sub>FN<sub>2</sub>O<sub>4</sub><sup>+</sup> [M+H]<sup>+</sup>: 501.2184, found: 501.2181. The *ee* value was determined by the chiral HPLC analysis (CHIRALCEL OX-H, *n*-hexane/2-propanol = 70 : 30,  $\nu$  = 1.0 mL/min,  $\lambda$  = 254.0 nm;  $t_{\text{major}}$  = 10.8 min,  $t_{\text{minor}}$  = 22.5 min).

**(S, Z)-4-(4-(tert-butyl)-2-(4-fluorophenyl)-5-oxo-4,5-dihydrooxazol-4-yl)-N-(4-methoxyphenyl)-2-phenylbut-2-enamide**

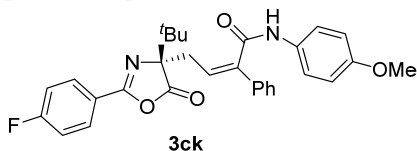

Colorless oil, 41.7 mg, 83%, 95% *ee*,  $[\alpha]_D^{25} = +112.0$  (*c* 0.5, CH<sub>2</sub>Cl<sub>2</sub>). <sup>1</sup>H NMR (500 MHz, CDCl<sub>3</sub>): δ 8.95 (s, 1H), 8.07 – 7.96 (m, 2H), 7.77 – 7.70 (m, 2H), 7.31 – 7.13 (m, 7H), 6.97 – 6.89 (m, 2H), 5.76 – 5.65 (dd, *J* = 9.5, 7.5 Hz, 1H), 3.82 (s, 3H), 3.22 – 3.12 (dd, *J* = 14.0, 9.5 Hz, 1H), 3.07 – 2.98 (dd, *J* = 14.0, 7.5 Hz, 1H), 1.10 (s, 9H). <sup>13</sup>C NMR (CDCl<sub>3</sub>, 125 MHz): δ 179.0, 165.9, 165.8 (d, *J* = 254.0 Hz), 160.4, 156.5, 144.0, 137.0, 131.5, 130.3 (d, *J* = 9.3 Hz), 128.5, 128.3, 126.9, 123.1, 121.3 (d, *J* = 3.1 Hz), 121.1, 116.6 (d, *J* = 22.5 Hz), 114.3, 78.9, 55.5, 37.8, 32.7, 25.0. <sup>19</sup>F NMR (CDCl<sub>3</sub>, 470 MHz): δ –104.0. IR (film)  $\nu_{\max}$  2966, 1820, 1653, 1602, 1509, 1296, 1276, 1238, 1033, 847, 764, 750. HRMS (ESI, *m/z*) calcd for C<sub>30</sub>H<sub>30</sub>FN<sub>2</sub>O<sub>4</sub><sup>+</sup> [M+H]<sup>+</sup>: 501.2184, found: 501.2181. The *ee* value was determined by the chiral HPLC analysis (CHIRALCEL OX-H, *n*-hexane/2-propanol = 70 : 30,  $\nu$  = 1.0 mL/min,  $\lambda$  = 254.0 nm;  $t_{\text{major}}$  = 8.2 min,  $t_{\text{minor}}$  = 13.4 min).

**(S, Z)-4-(4-(tert-butyl)-2-(4-chlorophenyl)-5-oxo-4,5-dihydrooxazol-4-yl)-N-(4-methoxyphenyl)-2-phenylbut-2-enamide**

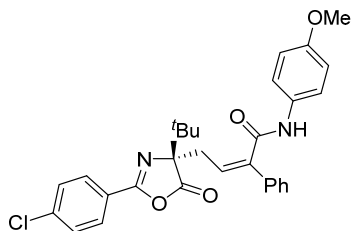

**3dk**

White solid, 43.9 mg, 85%, Mp: 58 – 60 °C, 93% *ee*,  $[\alpha]_D^{25} = +104.0$  (*c* 0.5, CH<sub>2</sub>Cl<sub>2</sub>). <sup>1</sup>H NMR (500 MHz, CDCl<sub>3</sub>): δ 8.89 (s, 1H), 7.97 – 7.90 (d, *J* = 7.5 Hz, 2H), 7.76 – 7.69 (d, *J* = 9.0 Hz, 2H), 7.51 – 7.44 (d, *J* = 9.0 Hz, 2H), 7.31 – 7.19 (m, 5H), 6.97 – 6.89 (d, *J* = 8.5 Hz, 2H), 5.75 – 5.66 (dd, *J* = 9.5, 7.5 Hz, 1H), 3.82 (s, 3H), 3.23 – 3.13 (dd, *J* = 14.0, 9.5 Hz, 1H), 3.08 – 2.99 (dd, *J* = 14.0, 7.5 Hz, 1H), 1.10 (s, 9H). <sup>13</sup>C NMR (CDCl<sub>3</sub>, 125 MHz): δ 178.9, 165.9, 160.5, 156.5, 144.0, 139.8, 137.0, 131.4, 129.6, 129.2, 128.5, 128.3, 126.9, 123.5, 123.0, 121.1, 114.3, 79.0, 55.5, 37.9, 32.7, 25.0. IR (film)  $\nu_{\max}$  2966, 1820, 1650, 1598, 1312, 1244, 1174, 1091, 1021, 964, 888. HRMS (ESI, *m/z*) calcd for C<sub>30</sub>H<sub>30</sub>ClN<sub>2</sub>O<sub>4</sub><sup>+</sup> [M+H]<sup>+</sup>: 517.1889, found: 517.1889. The *ee* value was determined by the chiral HPLC analysis (CHIRALCEL OX-H, *n*-hexane/2-propanol = 80 : 20,  $\nu$  = 1.0 mL/min,  $\lambda$  = 254.0 nm;  $t_{\text{major}}$  = 11.0 min,  $t_{\text{minor}}$  = 20.3 min).

**(S, Z)-4-(2-(3-bromophenyl)-4-(tert-butyl)-5-oxo-4,5-dihydrooxazol-4-yl)-N-(4-methoxyphenyl)-2-phenylbut-2-enamide**

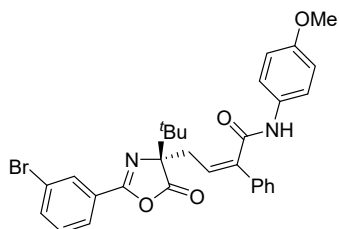

**3ek**

Colorless oil, 41.6 mg, 74%, 92% *ee*,  $[\alpha]_D^{25} = +72.0$  (*c* 0.5, CH<sub>2</sub>Cl<sub>2</sub>). <sup>1</sup>H NMR (500 MHz, CDCl<sub>3</sub>): δ 8.74 (s, 1H), 8.19 – 8.14 (t, *J* = 2.0 Hz, 1H), 7.97 – 7.88 (m, 1H), 7.75 – 7.68 (m, 3H), 7.40 – 7.35 (t, *J* = 8.0 Hz, 1H), 7.31 – 7.22 (m, 5H), 6.96 – 6.91 (m, 2H), 5.75 – 5.65 (dd, *J* = 9.5, 8.0 Hz, 1H), 3.82 (s, 3H), 3.22 – 3.12 (dd, *J* = 14.0, 9.5 Hz, 1H), 3.10 – 3.01 (dd, *J* = 14.0, 8.0 Hz, 1H), 1.10 (s, 9H). <sup>13</sup>C NMR (CDCl<sub>3</sub>, 125 MHz): δ 178.9, 165.9, 156.0, 156.5, 144.0, 136.9, 136.3, 131.3, 130.9, 130.7, 128.6, 128.4, 127.0, 126.9, 126.3, 123.2, 122.9, 121.3, 114.3, 79.1, 55.5, 37.9, 32.6, 25.0. IR (film)  $\nu_{\max}$  2965, 1824, 1670, 1653, 1559, 1509, 1300, 1275, 1261, 1035, 892. HRMS (ESI, *m/z*) calcd for C<sub>30</sub>H<sub>30</sub>BrN<sub>2</sub>O<sub>4</sub><sup>+</sup> [M+H]<sup>+</sup>: 561.1383, found: 561.1380. The *ee* value was determined by the chiral HPLC analysis (CHIRALCEL OX-H, *n*-hexane/2-propanol = 80 : 20,  $\nu$  = 1.0 mL/min,  $\lambda$  = 254.0 nm;  $t_{\text{major}}$  = 10.7 min,  $t_{\text{minor}}$  = 19.8 min).



**(S, Z)-4-(2-(4-bromophenyl)-4-(tert-butyl)-5-oxo-4,5-dihydrooxazol-4-yl)-N-(4-methoxyphenyl)-2-phenylbut-2-enamide**

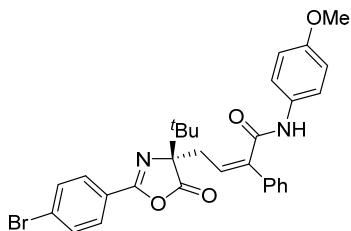

**3fk**

White solid, 41.6 mg, 74%, Mp: 64 – 66 °C, 94% *ee*,  $[\alpha]_D^{25} = +96.0$  (*c* 0.5, CH<sub>2</sub>Cl<sub>2</sub>). <sup>1</sup>H NMR (500 MHz, CDCl<sub>3</sub>): δ 8.87 (s, 1H), 7.89 – 7.82 (d, *J* = 8.5 Hz, 2H), 7.75 – 7.68 (d, *J* = 9.0 Hz, 2H), 7.66 – 7.61 (d, *J* = 9.0 Hz, 2H), 7.30 – 7.19 (m, 5H), 6.96 – 6.89 (d, *J* = 9.0 Hz, 2H), 5.73 – 5.67 (dd, *J* = 9.5, 7.5 Hz, 1H), 3.82 (s, 3H), 3.22 – 3.13 (dd, *J* = 13.5, 9.5 Hz, 1H), 3.07 – 2.99 (dd, *J* = 13.5, 7.5 Hz, 1H), 1.10 (s, 9H). <sup>13</sup>C NMR (CDCl<sub>3</sub>, 125 MHz): δ 178.9, 165.9, 160.6, 156.5, 144.0, 137.0, 132.6, 131.4, 129.3, 128.5, 128.4, 128.3, 126.9, 124.0, 123.0, 121.1, 114.3, 79.0, 55.5, 37.9, 32.6, 25.0. IR (film)  $\nu_{\max}$  2963, 1820, 1671, 1648, 1593, 1510, 1399, 1245, 1068, 1009, 831. HRMS (ESI, *m/z*) calcd for C<sub>30</sub>H<sub>30</sub>BrN<sub>2</sub>O<sub>4</sub><sup>+</sup> [M+H]<sup>+</sup>: 561.1383, found: 561.1379. The *ee* value was determined by the chiral HPLC analysis (CHIRALCEL OX-H, *n*-hexane/2-propanol = 70 : 30,  $\nu$  = 1.0 mL/min,  $\lambda$  = 254.0 nm; *t*<sub>major</sub> = 8.5 min, *t*<sub>minor</sub> = 14.6 min).

**(S, Z)-4-(4-(tert-butyl)-5-oxo-2-(*m*-tolyl)-4,5-dihydrooxazol-4-yl)-N-(4-methoxyphenyl)-2-phenylbut-2-enamide**

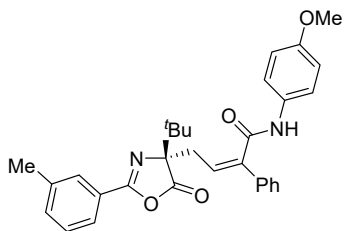

**3gk**

Colorless oil, 44.5 mg, 90%, 91% *ee*,  $[\alpha]_D^{25} = +96.0$  (*c* 0.5, CH<sub>2</sub>Cl<sub>2</sub>). <sup>1</sup>H NMR (500 MHz, CDCl<sub>3</sub>): δ 9.08 (s, 1H), 7.85 – 7.71 (m, 4H), 7.43 – 7.32 (m, 2H), 7.32 – 7.17 (m, 5H), 6.98 – 6.88 (m, 2H), 5.76 – 5.67 (dd, *J* = 9.5, 7.5 Hz, 1H), 3.82 (s, 3H), 3.24 – 3.13 (dd, *J* = 13.5, 9.5 Hz, 1H), 3.06 – 2.97 (dd, *J* = 13.5, 7.5 Hz, 1H), 2.38 (s, 3H), 1.10 (s, 9H). <sup>13</sup>C NMR (CDCl<sub>3</sub>, 125 MHz): δ 179.2, 166.0, 161.5, 156.4, 144.0, 139.1, 137.1, 134.2, 131.6, 129.1, 128.5, 128.4, 128.2, 126.9, 125.0, 125.0, 123.1, 121.1, 114.3, 78.7, 55.5, 37.8, 32.7, 25.0, 21.4. IR (film)  $\nu_{\max}$  2962, 1824, 1699, 1684, 1653, 1509, 1473, 1457, 1275, 906, 764. HRMS (ESI, *m/z*) calcd for C<sub>31</sub>H<sub>33</sub>N<sub>2</sub>O<sub>4</sub><sup>+</sup> [M+H]<sup>+</sup>: 497.2435, found: 497.2433. The *ee* value was determined by the chiral HPLC analysis (CHIRALCEL OX-H, *n*-hexane/2-propanol = 80 : 20,  $\nu$  = 1.0 mL/min,  $\lambda$  = 254.0 nm; *t*<sub>major</sub> = 11.6 min, *t*<sub>minor</sub> = 22.4 min).

**(S, Z)-4-(4-(tert-butyl)-5-oxo-2-(p-tolyl)-4,5-dihydrooxazol-4-yl)-N-(4-methoxyphenyl)-2-phenylbut-2-enamide**

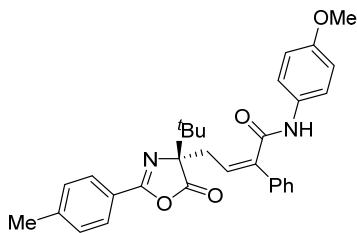

**3hk**

Colorless oil, 43.0 mg, 87%, 95% *ee*,  $[\alpha]_D^{25} = +136.0$  (*c* 0.5, CH<sub>2</sub>Cl<sub>2</sub>). <sup>1</sup>H NMR (500 MHz, CDCl<sub>3</sub>): δ 9.18 (s, 1H), 7.91 – 7.85 (d, *J* = 8.5 Hz, 2H), 7.79 – 7.73 (m, 2H), 7.32 – 7.26 (m, 4H), 7.23 – 7.18 (m, 3H), 6.96 – 6.90 (m, 2H), 5.75 – 5.67 (dd, *J* = 10.0, 7.0 Hz, 1H), 3.82 (s, 3H), 3.22 – 3.13 (dd, *J* = 13.5, 10.0 Hz, 1H), 3.03 – 2.95 (dd, *J* = 13.5, 7.0 Hz, 1H), 2.41 (s, 3H), 1.10 (s, 9H). <sup>13</sup>C NMR (CDCl<sub>3</sub>, 125 MHz): δ 179.2, 166.0, 161.5, 156.4, 144.3, 144.0, 137.2, 131.7, 129.9, 128.4, 128.2, 127.9, 126.9, 123.1, 122.3, 121.1, 114.3, 78.6, 55.5, 37.8, 32.7, 25.0, 21.8. IR (film)  $\nu_{\max}$  2961, 1820, 1670, 1653, 1540, 1533, 1260, 968, 830, 724. HRMS (ESI, *m/z*) calcd for C<sub>31</sub>H<sub>33</sub>N<sub>2</sub>O<sub>4</sub><sup>+</sup> [M+H]<sup>+</sup>: 497.2435, found: 497.2433. The *ee* value was determined by the chiral HPLC analysis (CHIRALCEL OX-H, *n*-hexane/2-propanol = 70 : 30,  $\nu$  = 1.0 mL/min,  $\lambda$  = 254.0 nm;  $t_{\text{major}}$  = 9.3 min,  $t_{\text{minor}}$  = 17.0 min).

**(S, Z)-4-(4-(tert-butyl)-2-(4-ethylphenyl)-5-oxo-4,5-dihydrooxazol-4-yl)-N-(4-methoxyphenyl)-2-phenylbut-2-enamide**

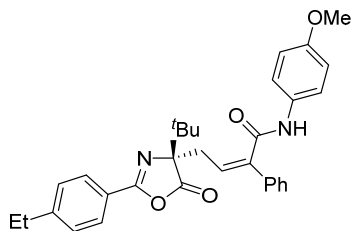

**3ik**

Colorless oil, 38.9 mg, 76%, 93% *ee*,  $[\alpha]_D^{25} = +128.0$  (*c* 0.5, CH<sub>2</sub>Cl<sub>2</sub>). <sup>1</sup>H NMR (500 MHz, CDCl<sub>3</sub>): δ 9.21 (s, 1H), 7.94 – 7.88 (d, *J* = 8.5 Hz, 2H), 7.81 – 7.74 (m, 2H), 7.35 – 7.18 (m, 7H), 6.96 – 6.90 (m, 2H), 5.75 – 5.68 (dd, *J* = 10.0, 7.0 Hz, 1H), 3.83 (s, 3H), 3.23 – 3.13 (dd, *J* = 13.5, 10.0 Hz, 1H), 3.03 – 2.95 (dd, *J* = 13.5, 7.0 Hz, 1H), 2.75 – 2.66 (q, *J* = 7.5 Hz, 2H), 1.28 – 1.22 (t, *J* = 7.5 Hz, 3H), 1.10 (s, 9H). <sup>13</sup>C NMR (CDCl<sub>3</sub>, 125 MHz): δ 179.2, 166.0, 161.5, 156.4, 150.4, 144.0, 137.2, 131.7, 128.7, 128.4, 128.2, 128.0, 126.9, 123.1, 122.4, 121.1, 114.3, 78.6, 55.5, 37.8, 32.8, 29.0, 25.0, 15.2. IR (film)  $\nu_{\max}$  2965, 1820, 1699, 1652, 1540, 1473, 966, 830, 735. HRMS (ESI, *m/z*) calcd for C<sub>32</sub>H<sub>35</sub>N<sub>2</sub>O<sub>4</sub><sup>+</sup> [M+H]<sup>+</sup>: 511.2591, found: 511.2590. The *ee* value was determined by the chiral HPLC analysis (CHIRALCEL OX-H, *n*-hexane/2-propanol = 70 : 30,  $\nu$  = 1.0 mL/min,  $\lambda$  = 254.0 nm;  $t_{\text{major}}$  = 8.2 min,  $t_{\text{minor}}$  = 14.5 min).

**(S, Z)-4-(4-(tert-butyl)-2-(naphthalen-2-yl)-5-oxo-4,5-dihydrooxazol-4-yl)-N-(4-methoxyphenyl)-2-phenylbut-2-enamide**

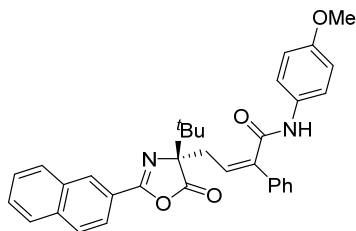

**3jk**

Colorless oil, 44.2 mg, 83%, 92% *ee*,  $[\alpha]_D^{25} = +104.0$  (*c* 0.5, CH<sub>2</sub>Cl<sub>2</sub>). <sup>1</sup>H NMR (500 MHz, CDCl<sub>3</sub>): δ 9.13 (s, 1H), 8.52 – 8.47 (d, *J* = 1.5 Hz, 1H), 8.09 – 8.04 (dd, *J* = 8.5, 2.0 Hz, 1H), 7.95 – 7.85 (m, 3H), 7.83 – 7.77 (m, 2H), 7.64 – 7.54 (m, 2H), 7.30 – 7.25 (m, 2H), 7.19 – 7.13 (m, 3H), 6.99 – 6.93 (m, 2H), 5.82 – 5.70 (dd, *J* = 9.5, 7.5 Hz, 1H), 3.83 (s, 3H), 3.29 – 3.18 (dd, *J* = 13.5, 9.5 Hz, 1H), 3.10 – 3.01 (dd, *J* = 13.5, 7.5 Hz, 1H), 1.14 (s, 9H). <sup>13</sup>C NMR (CDCl<sub>3</sub>, 125 MHz): δ 179.2, 166.0, 161.5, 156.5, 144.1, 137.1, 135.5, 132.6, 131.6, 129.9, 129.3, 129.2, 128.8, 128.5, 128.2, 128.0, 127.4, 126.9, 123.1, 122.9, 122.1, 121.2, 114.3, 78.9, 55.5, 37.9, 32.8, 25.1. IR (film)  $\nu_{\max}$  2967, 1824, 1717, 1688, 1652, 1034, 1014, 888, 831. HRMS (ESI, *m/z*) calcd for C<sub>34</sub>H<sub>33</sub>N<sub>2</sub>O<sub>4</sub><sup>+</sup> [M+H]<sup>+</sup>: 533.2435, found: 533.2435. The *ee* value was determined by the chiral HPLC analysis (CHIRALCEL OX-H, *n*-hexane/2-propanol = 70 : 30,  $\nu$  = 1.0 mL/min,  $\lambda$  = 254.0 nm; *t*<sub>major</sub> = 9.7 min, *t*<sub>minor</sub> = 19.1 min).

**(S, Z)-4-(4-(tert-butyl)-2-(furan-2-yl)-5-oxo-4,5-dihydrooxazol-4-yl)-N-(4-methoxyphenyl)-2-phenylbut-2-enamide**

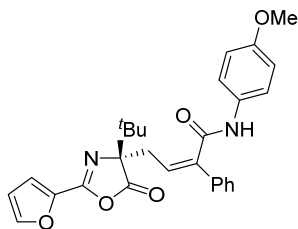

**3kk**

Colorless oil, 37.8 mg, 80%, 92% *ee*,  $[\alpha]_D^{25} = +184.0$  (*c* 0.5, CH<sub>2</sub>Cl<sub>2</sub>). <sup>1</sup>H NMR (500 MHz, CDCl<sub>3</sub>): δ 9.30 (s, 1H), 7.85 – 7.79 (d, *J* = 9.0 Hz, 2H), 7.68 – 7.64 (d, *J* = 1.5 Hz, 1H), 7.33 – 7.21 (m, 5H), 7.14 – 7.10 (d, *J* = 3.5 Hz, 1H), 6.96 – 6.89 (m, 2H), 6.61 – 6.56 (dd, *J* = 3.5, 1.5 Hz, 1H), 5.74 – 5.66 (dd, *J* = 10.5, 7.0 Hz, 1H), 3.82 (s, 3H), 3.20 – 3.12 (dd, *J* = 13.5, 10.5 Hz, 1H), 3.00 – 2.93 (dd, *J* = 13.5, 7.0 Hz, 1H), 1.08 (s, 9H). <sup>13</sup>C NMR (CDCl<sub>3</sub>, 125 MHz): δ 178.0, 165.8, 156.3, 153.2, 147.6, 144.6, 140.1, 137.1, 131.9, 128.5, 128.2, 126.9, 122.3, 120.9, 117.9, 114.2, 112.4, 78.1, 55.5, 37.8, 32.9, 24.9. IR (film)  $\nu_{\max}$  3127, 2967, 1823, 1666, 1601, 1540, 1510, 1245, 1175, 1034. HRMS (ESI, *m/z*) calcd for C<sub>28</sub>H<sub>29</sub>N<sub>2</sub>O<sub>5</sub><sup>+</sup> [M+H]<sup>+</sup>: 473.2071, found: 473.2072. The *ee* value was determined by the chiral HPLC analysis (CHIRALCEL OX-H, *n*-hexane/2-propanol = 70 : 30,  $\nu$  = 1.0 mL/min,  $\lambda$  = 254.0 nm; *t*<sub>major</sub> = 9.9 min, *t*<sub>minor</sub> = 15.9 min).

**(S, Z)-4-(4-(tert-butyl)-5-oxo-2-(thiophen-2-yl)-4,5-dihydrooxazol-4-yl)-N-(4-methoxyphenyl)-2-phenylbut-2-enamide**

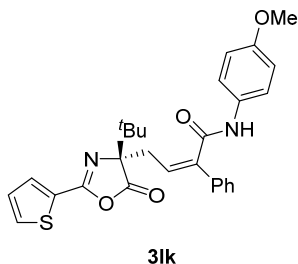

Colorless oil, 43.9 mg, 90%, 93% *ee*,  $[\alpha]_D^{25} = +152.0$  (*c* 0.5, CH<sub>2</sub>Cl<sub>2</sub>). <sup>1</sup>H NMR (500 MHz, CDCl<sub>3</sub>): δ 9.28 (s, 1H), 7.83 – 7.77 (m, 2H), 7.72 – 7.68 (dd, *J* = 4.0, 1.5 Hz, 1H), 7.61 – 7.57 (m, 1H), 7.32 – 7.26 (m, 2H), 7.24 – 7.19 (m, 3H), 7.16 – 7.13 (dd, *J* = 5.0, 3.5 Hz, 1H), 6.96 – 6.90 (m, 2H), 5.75 – 5.67 (dd, *J* = 10.5, 6.5 Hz, 1H), 3.82 (s, 3H), 3.23 – 3.14 (dd, *J* = 14.0, 10.5 Hz, 1H), 2.99 – 2.91 (dd, *J* = 14.0, 6.5 Hz, 1H), 1.09 (s, 9H). <sup>13</sup>C NMR (CDCl<sub>3</sub>, 125 MHz): δ 178.3, 165.9, 157.3, 156.3, 144.5, 137.2, 132.7, 132.4, 131.8, 128.6, 128.4, 128.2, 127.5, 126.9, 122.6, 121.0, 114.2, 78.5, 55.5, 37.9, 33.0, 25.0. IR (film)  $\nu_{\max}$  2960, 1819, 1670, 1646, 1539, 1244, 1034, 956, 830, 750. HRMS (ESI, *m/z*) calcd for C<sub>28</sub>H<sub>29</sub>N<sub>2</sub>O<sub>4</sub>S<sup>+</sup> [M+H]<sup>+</sup>: 489.1843, found: 489.1845. The *ee* value was determined by the chiral HPLC analysis (CHIRALCEL OX-H, *n*-hexane/2-propanol = 80 : 20,  $\nu$  = 1.0 mL/min,  $\lambda$  = 254.0 nm;  $t_{\text{major}}$  = 15.9 min,  $t_{\text{minor}}$  = 31.0 min).

**(R, Z)-4-(4-ethyl-5-oxo-2-phenyl-4,5-dihydrooxazol-4-yl)-N-(4-methoxyphenyl)-2-phenylbut-2-enamide**

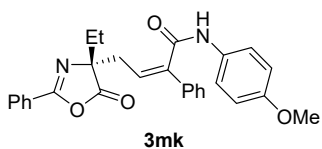

Colorless oil, 28.3 mg, 62%, 89% *ee*,  $[\alpha]_D^{25} = +136$  (*c* 0.5, CH<sub>2</sub>Cl<sub>2</sub>). <sup>1</sup>H NMR (500 MHz, CDCl<sub>3</sub>): δ 8.78 (s, 1H), 8.03 – 7.96 (m, 2H), 7.71 – 7.64 (m, 2H), 7.62 – 7.56 (m, 1H), 7.52 – 7.46 (m, 2H), 7.36 – 7.29 (m, 2H), 7.28 – 7.22 (m, 3H), 6.95 – 6.87 (m, 2H), 5.87 – 5.80 (dd, *J* = 9.5, 7.5 Hz, 1H), 3.82 (s, 3H), 3.18 – 3.08 (dd, *J* = 14.0, 9.5 Hz, 1H), 3.00 – 2.91 (dd, *J* = 14.0, 7.5 Hz, 1H), 2.07 – 1.98 (m, 2H), 0.98 – 0.88 (t, *J* = 7.5 Hz, 3H). <sup>13</sup>C NMR (CDCl<sub>3</sub>, 125 MHz): δ 179.7, 165.9, 161.5, 156.5, 143.6, 136.9, 133.4, 131.4, 129.1, 128.6, 128.4, 128.0, 127.0, 125.1, 123.3, 121.3, 114.3, 74.0, 55.6, 37.3, 31.1, 8.2. IR (film)  $\nu_{\max}$  2925, 1818, 1652, 1510, 1451, 1244, 1036, 1019, 830, 696. HRMS (ESI, *m/z*) calcd for C<sub>28</sub>H<sub>27</sub>N<sub>2</sub>O<sub>4</sub><sup>+</sup> [M+H]<sup>+</sup>: 455.1965, found: 455.1968. The *ee* value was determined by the chiral HPLC analysis (CHIRALPAK IC, *n*-hexane/2-propanol = 80 : 20,  $\nu$  = 1.0 mL/min,  $\lambda$  = 254.0 nm;  $t_{\text{major}}$  = 18.6 min,  $t_{\text{minor}}$  = 21.6 min).

**(S, Z)-4-(4-isopropyl-5-oxo-2-phenyl-4,5-dihydrooxazol-4-yl)-N-(4-methoxyphenyl)-2-phenylbut-2-enamide**

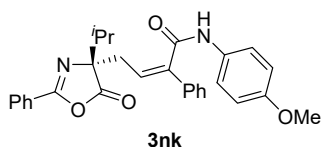

Colorless oil, 35.5 mg, 76%, 91% *ee*,  $[\alpha]_D^{25} = +128$  (*c* 0.5, CH<sub>2</sub>Cl<sub>2</sub>). <sup>1</sup>H NMR (500 MHz, CDCl<sub>3</sub>): δ 8.91 (s, 1H), 8.05 – 7.94 (m, 2H), 7.78 – 7.67 (m, 2H), 7.63 – 7.54 (m, 1H), 7.52 – 7.44 (m, 2H), 7.33 – 7.28 (m, 2H), 7.26 – 7.21 (m, 3H), 6.96 – 6.90 (m, 2H), 5.82 – 5.75 (dd, *J* = 9.5, 7.5 Hz, 1H), 3.82 (s, 3H), 3.25 – 3.17 (dd, *J* = 14.0, 9.5 Hz, 1H), 2.96 – 2.89 (dd, *J* = 14.0, 7.5 Hz, 1H), 2.29 – 2.19 (m, 1H), 1.13 – 1.07 (d, *J* = 7.0 Hz, 3H), 1.03 – 0.96 (d, *J* = 7.0 Hz, 3H). <sup>13</sup>C NMR (CDCl<sub>3</sub>, 125 MHz): δ 179.8, 165.9, 161.6, 156.5, 143.8, 137.0, 133.4, 131.5, 129.1, 128.5, 128.3, 128.0, 126.9, 125.1, 123.1, 121.2, 114.3, 55.5, 35.5, 17.2, 17.0. IR (film)  $\nu_{\max}$  2924, 1819, 1650, 1511, 1294, 1245, 1037, 738, 698. HRMS (ESI, *m/z*) calcd for C<sub>28</sub>H<sub>29</sub>N<sub>2</sub>O<sub>4</sub><sup>+</sup> [M+H]<sup>+</sup>: 469.2122, found: 469.2123. The *ee* value was determined by the chiral HPLC analysis (CHIRALCEL OX-H, *n*-hexane/2-propanol = 80 : 20,  $\nu$  = 1.0 mL/min,  $\lambda$  = 254.0 nm;  $t_{\text{major}}$  = 14.6 min,  $t_{\text{minor}}$  = 19.0 min).

**methyl (S, Z)-2-benzamido-2-(tert-butyl)-6-((4-methoxyphenyl)amino)-6-oxo-5-phenylhex-4-enoate**

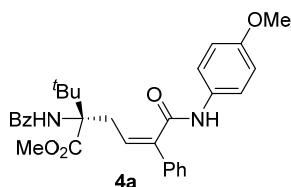

Colorless oil, 46.5 mg, 90%, 95% *ee*,  $[\alpha]_D^{25} = +56.0$  (*c* 0.5, CH<sub>2</sub>Cl<sub>2</sub>). <sup>1</sup>H NMR (500 MHz, CDCl<sub>3</sub>): δ 9.66 (s, 1H), 7.83 – 7.77 (m, 4H), 7.61 (s, 1H), 7.55 – 7.49 (m, 1H), 7.47 – 7.42 (m, 2H), 7.38 – 7.34 (m, 2H), 7.26 – 7.18 (m, 3H), 6.94 – 6.89 (m, 2H), 5.64 – 5.58 (dd, *J* = 9.5, 3.5 Hz, 1H), 4.09 – 3.99 (dd, *J* = 16.5, 9.5 Hz, 1H), 3.88 (s, 3H), 3.80 (s, 3H), 3.27 – 3.18 (dd, *J* = 16.5, 3.5 Hz, 1H), 1.10 (s, 9H). <sup>13</sup>C NMR (CDCl<sub>3</sub>, 125 MHz): δ 174.0, 167.3, 166.6, 156.2, 141.2, 137.8, 135.2, 132.2, 131.9, 128.8, 128.4, 127.8, 126.9, 126.6, 125.9, 121.4, 114.2, 71.3, 55.5, 53.3, 40.4, 30.2, 26.8. IR (film)  $\nu_{\max}$  2957, 1724, 1655, 1602, 1511, 1275, 1235, 1179, 829, 764, 750. HRMS (ESI, *m/z*) calcd for C<sub>31</sub>H<sub>35</sub>N<sub>2</sub>O<sub>5</sub><sup>+</sup> [M+H]<sup>+</sup>: 515.2540, found: 515.2538. The *ee* value was determined by the chiral HPLC analysis (CHIRALCEL OX-H, *n*-hexane/2-propanol = 80 : 20,  $\nu$  = 1.0 mL/min,  $\lambda$  = 254.0 nm;  $t_{\text{major}}$  = 9.2 min,  $t_{\text{minor}}$  = 13.0 min).

**(S, Z)-N-(3-(hydroxymethyl)-7-((4-methoxyphenyl)amino)-2,2-dimethyl-7-oxo-6-phenylhept-5-en-3-yl)benzamide**

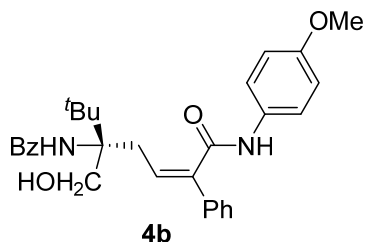

Colorless oil, 45.4 mg, 93%, 95% *ee*,  $[\alpha]_D^{25} = +96.0$  (*c* 0.5, CH<sub>2</sub>Cl<sub>2</sub>). <sup>1</sup>H NMR (500 MHz, CDCl<sub>3</sub>): δ 7.92 (s, 1H), 7.84 – 7.78 (m, 2H), 7.74 (s, 1H), 7.43 – 7.28 (m, 5H), 7.24 – 7.15 (m, 5H), 6.81 – 6.74 (m, 2H), 6.36 – 6.29 (dd, *J* = 10.0, 7.5 Hz, 1H), 4.94 (s, 1H), 4.41 – 4.32 (d, *J* = 12.5 Hz, 1H), 3.93 – 3.83 (d, *J* = 12.5 Hz, 1H), 3.71 (s, 3H), 3.26 – 3.16 (dd, *J* = 14.0, 10.0 Hz, 1H), 2.43 – 2.34 (dd, *J* = 14.0, 7.5 Hz, 1H), 1.05 (s, 9H). <sup>13</sup>C NMR (CDCl<sub>3</sub>, 125 MHz): δ 169.1, 167.1, 156.7, 139.1, 137.8, 135.4, 135.3, 131.4, 130.8, 128.8, 128.5, 128.2, 127.5, 127.3, 121.7, 114.2, 67.6, 66.5, 55.5, 39.8, 35.5, 26.5. IR (film)  $\nu_{\max}$  2960, 1734, 1700, 1653, 1647, 1533, 1521, 1457, 1275, 1261, 764, 750. HRMS (ESI, *m/z*) calcd for C<sub>30</sub>H<sub>35</sub>N<sub>2</sub>O<sub>4</sub><sup>+</sup> [M+H]<sup>+</sup>: 487.2591, found: 487.2590. The *ee* value was determined by the chiral HPLC analysis (CHIRALCEL OX-H, *n*-hexane/2-propanol = 80 : 20,  $\nu$  = 1.0 mL/min,  $\lambda$  = 254.0 nm;  $t_{\text{major}}$  = 8.6 min,  $t_{\text{minor}}$  = 13.9 min).

**(S, Z)-N-(3-formyl-7-((4-methoxyphenyl)amino)-2,2-dimethyl-7-oxo-6-phenylhept-5-en-3-yl)benzamide**

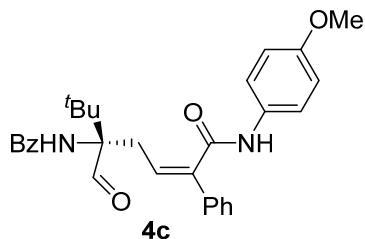

Colorless oil, 36.3 mg, 75%, 95% *ee*,  $[\alpha]_D^{25} = +72.0$  (*c* 0.5, CH<sub>2</sub>Cl<sub>2</sub>). <sup>1</sup>H NMR (500 MHz, CDCl<sub>3</sub>): δ 9.88 (s, 1H), 8.37 (s, 1H), 7.83 – 7.76 (m, 2H), 7.59 – 7.46 (m, 4H), 7.44 – 7.38 (t, *J* = 7.0 Hz, 2H), 7.25 – 7.20 (m, 5H), 6.90 – 6.85 (m, 2H), 5.90 – 5.81 (dd, *J* = 10.0, 5.5 Hz, 1H), 3.80 (s, 3H), 3.60 – 3.49 (dd, *J* = 14.5, 10.0 Hz, 1H), 3.17 – 3.07 (dd, *J* = 14.5, 5.5 Hz, 1H), 1.16 (s, 9H). <sup>13</sup>C NMR (CDCl<sub>3</sub>, 125 MHz): δ 200.3, 168.0, 166.7, 156.5, 140.7, 137.4, 134.0, 131.9, 131.2, 129.2, 128.7, 128.6, 128.1, 127.2, 127.0, 121.7, 114.2, 70.9, 55.5, 39.4, 29.8, 26.3. IR (film)  $\nu_{\max}$  2967, 1717, 1653, 1602, 1577, 1511, 1489, 1245, 1178, 1033, 830, 764, 750. HRMS (ESI, *m/z*) calcd for C<sub>30</sub>H<sub>33</sub>N<sub>2</sub>O<sub>4</sub><sup>+</sup> [M+H]<sup>+</sup>: 485.2435, found: 485.2433. The *ee* value was determined by the chiral HPLC analysis (CHIRALCEL OX-H, *n*-hexane/2-propanol = 80 : 20,  $\nu$  = 1.0 mL/min,  $\lambda$  = 254.0 nm;  $t_{\text{major}}$  = 12.8 min,  $t_{\text{minor}}$  = 25.3 min).

## NMR Spectra of Products

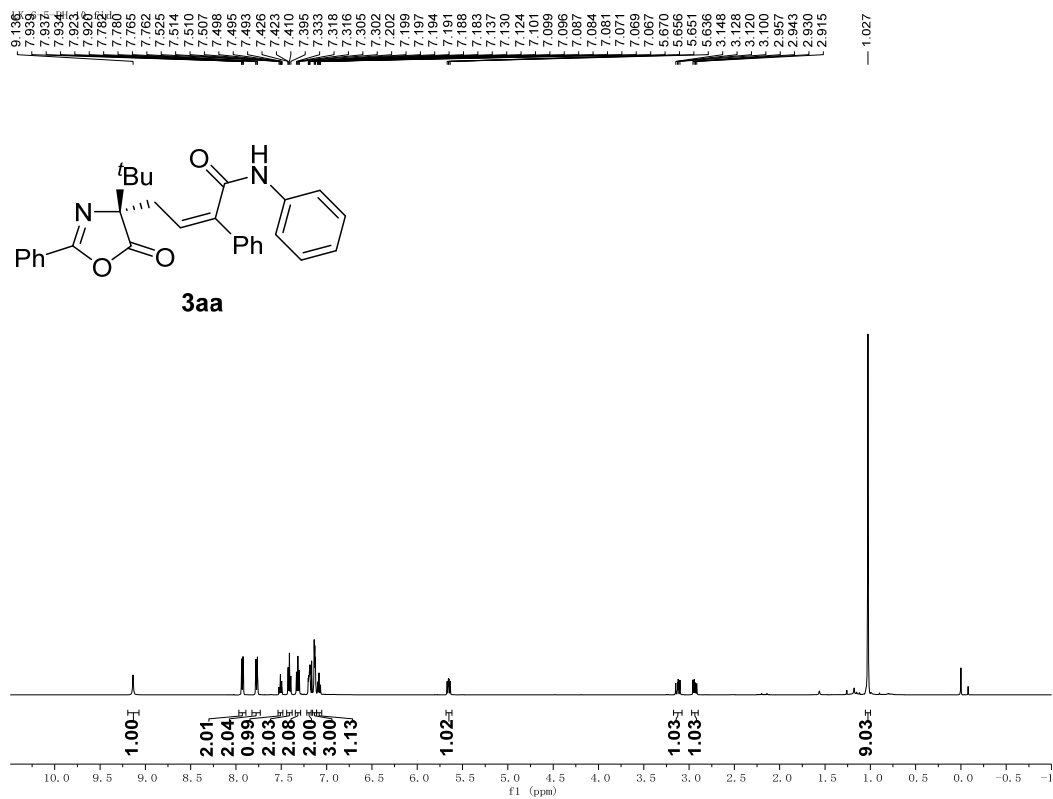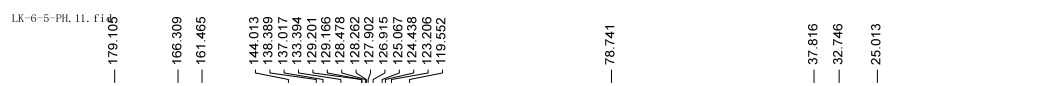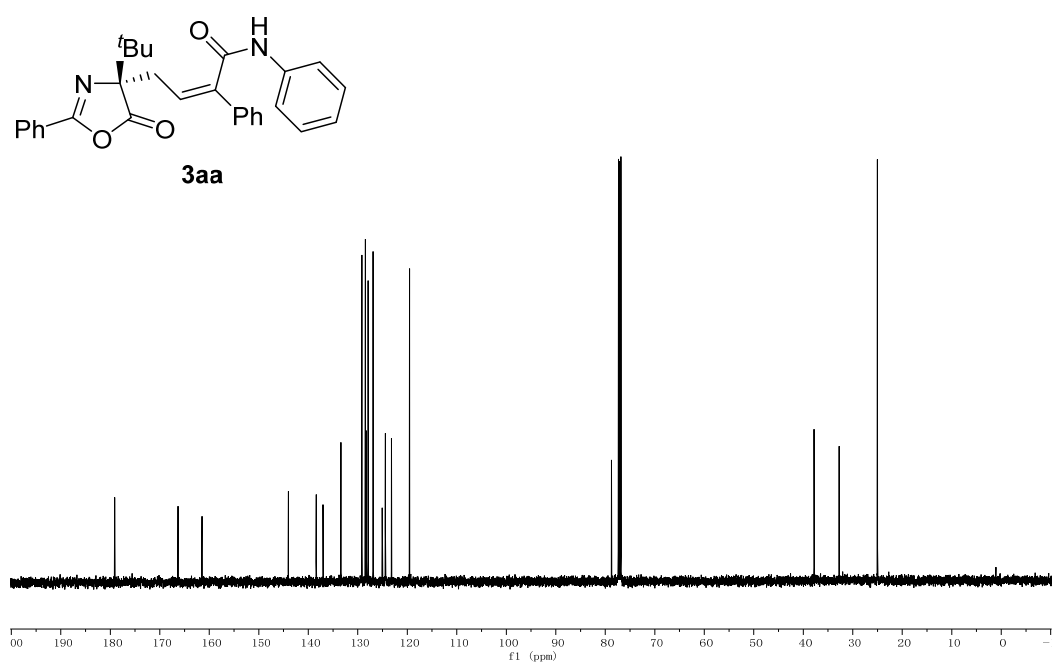

<sup>1</sup>H NMR (500 MHz) and <sup>13</sup>C NMR (125 MHz) spectra of **3aa**

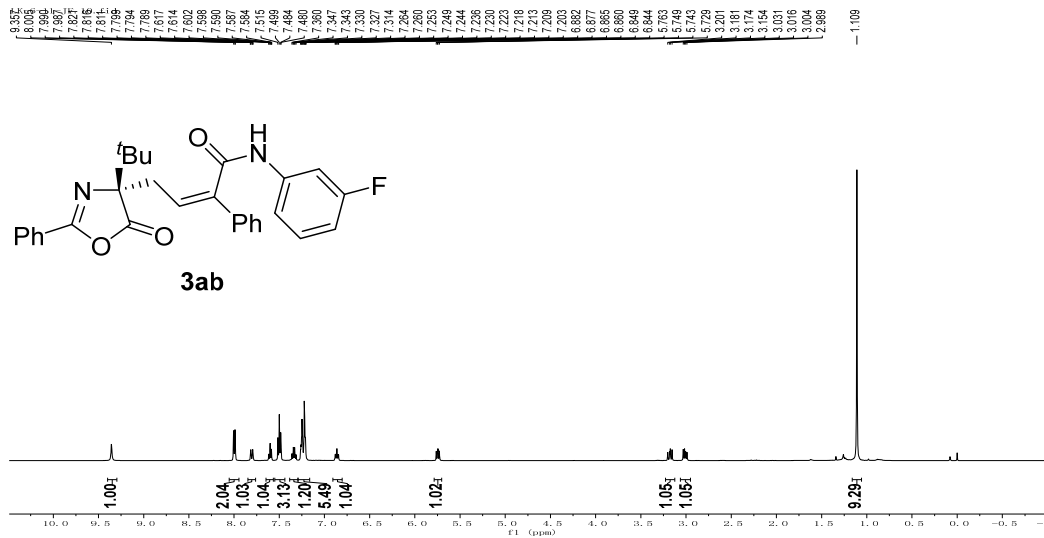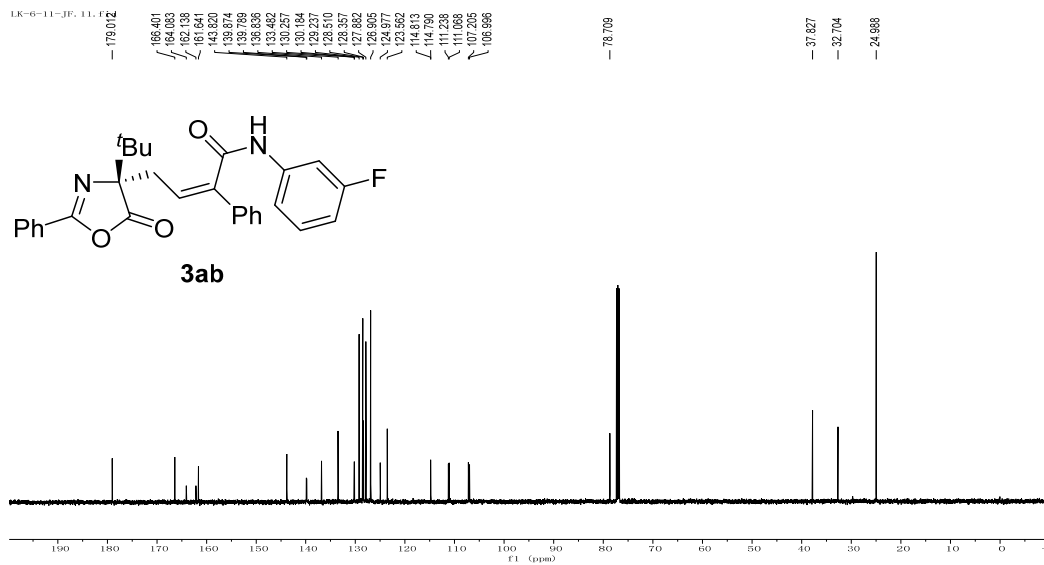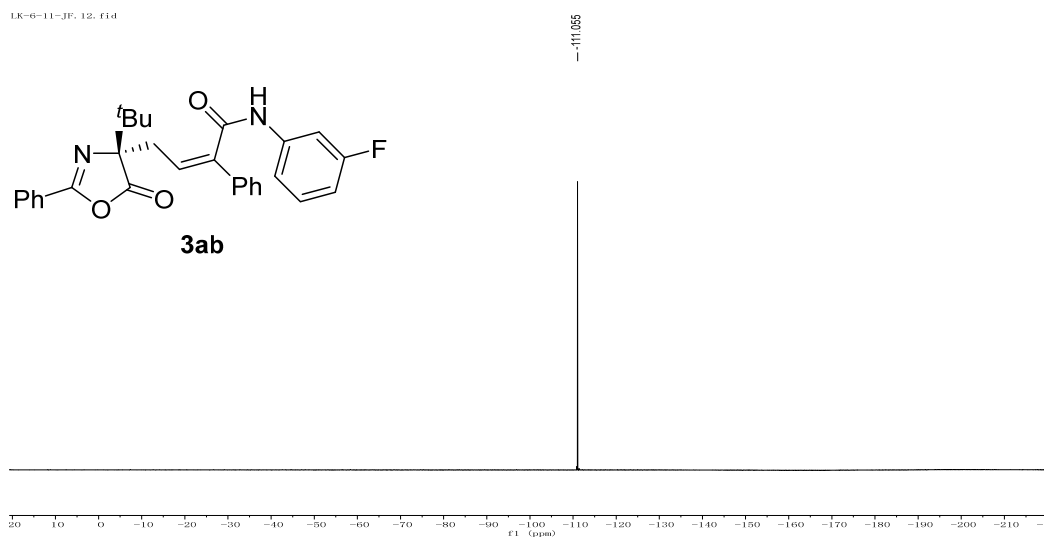

$^1\text{H}$  NMR (500 MHz),  $^{13}\text{C}$  NMR (125 MHz) and  $^{19}\text{F}$  NMR (470 MHz) spectra of **3ab**



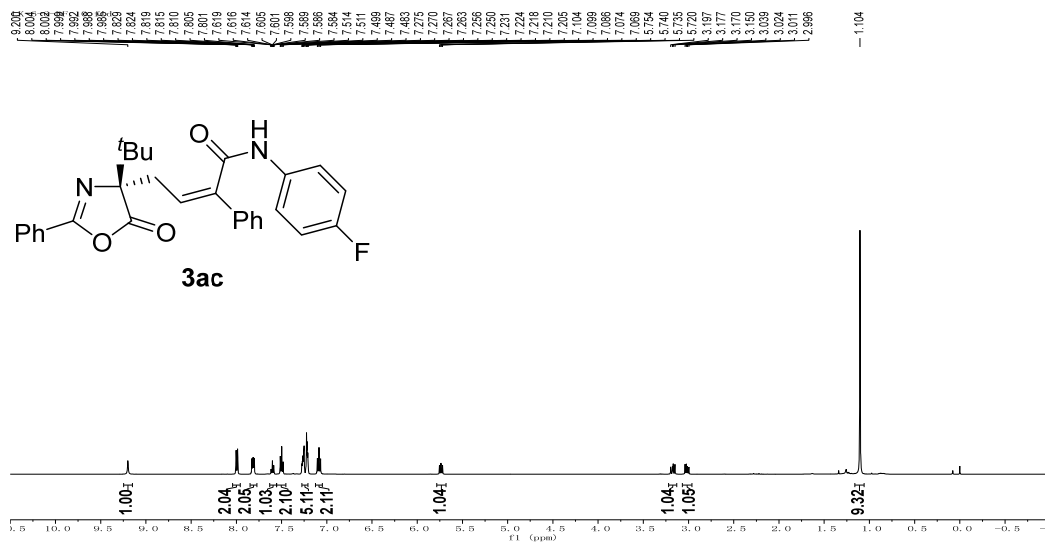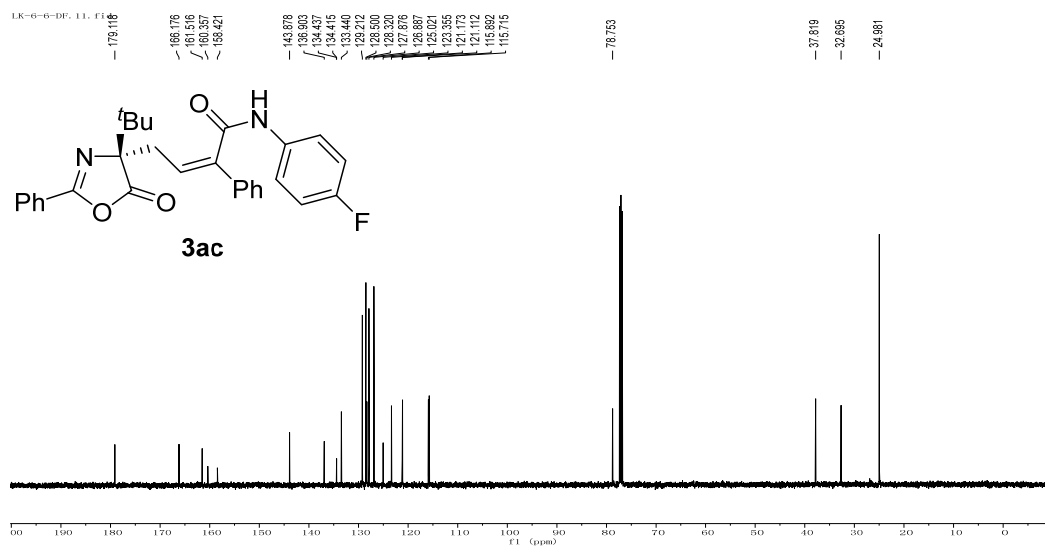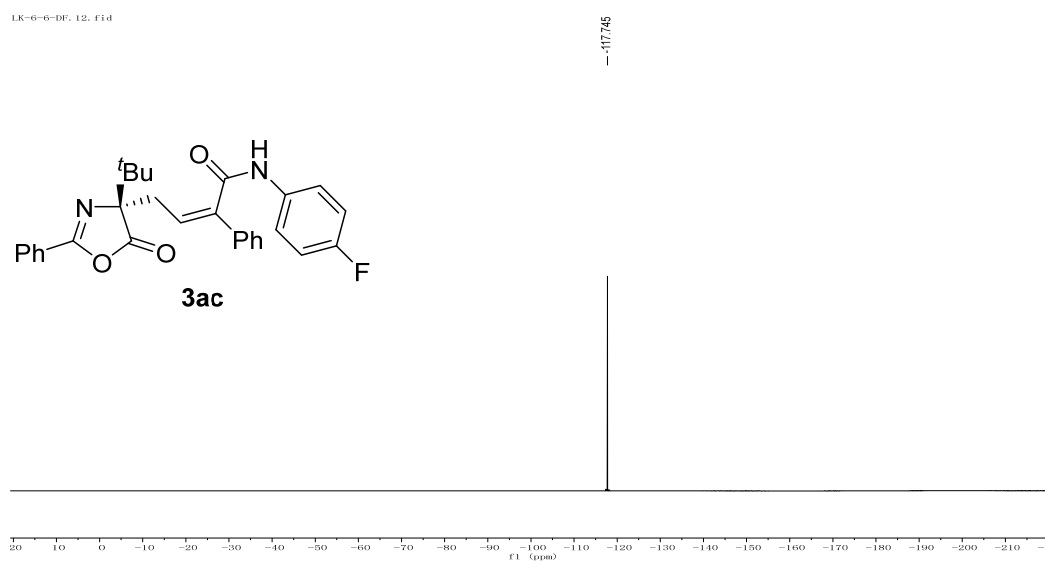

<sup>1</sup>H NMR (500 MHz), <sup>13</sup>C NMR (125 MHz) and <sup>19</sup>F NMR (470 MHz) spectra of **3ac**

LK-6-12-JCL.10.f1  
9.206

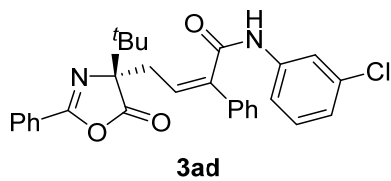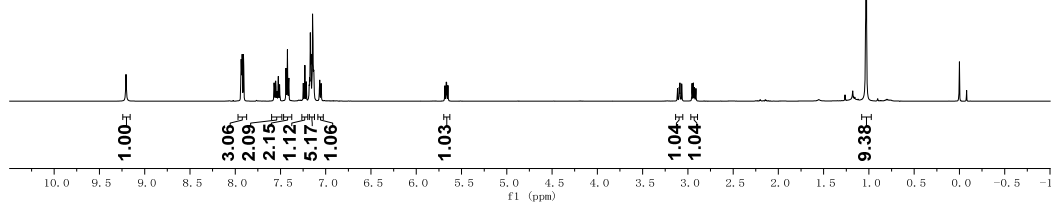

LK-6-12-JCL.11

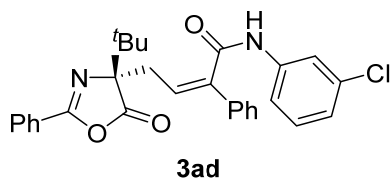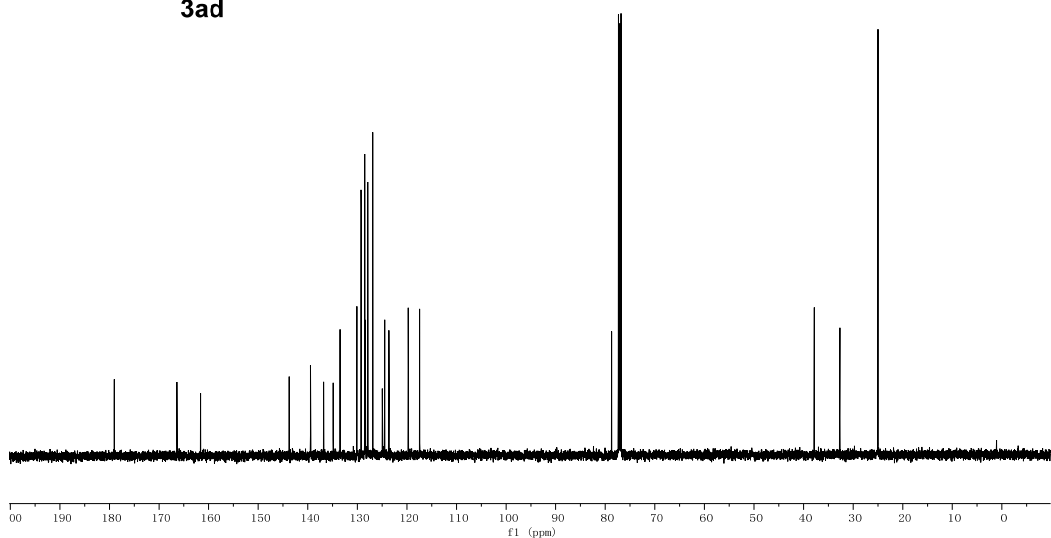

<sup>1</sup>H NMR (500 MHz) and <sup>13</sup>C NMR (125 MHz) spectra of **3ad**

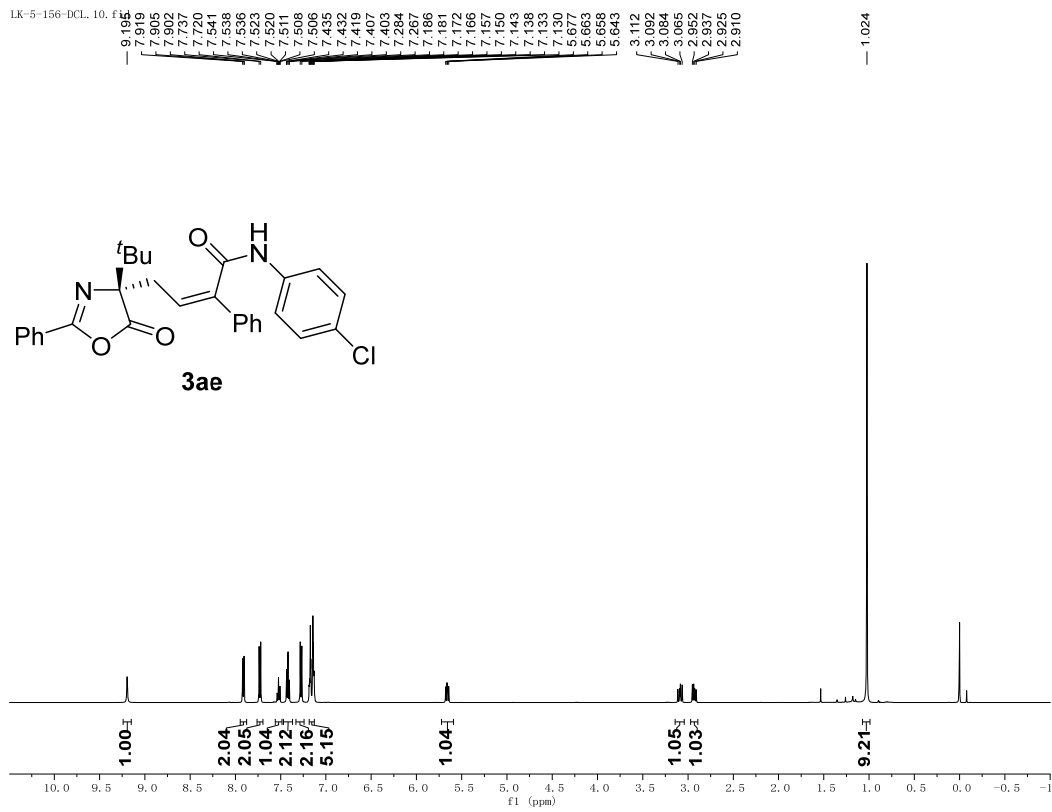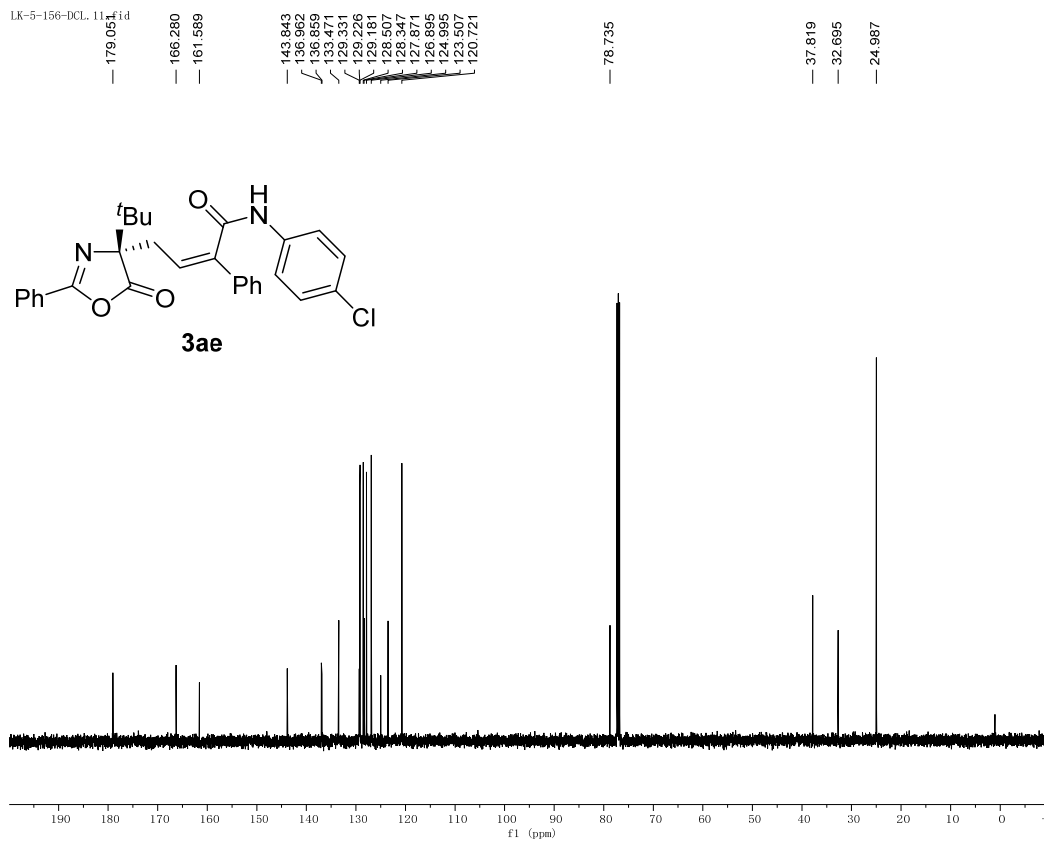

<sup>1</sup>H NMR (500 MHz) and <sup>13</sup>C NMR (125 MHz) spectra of **3ae**

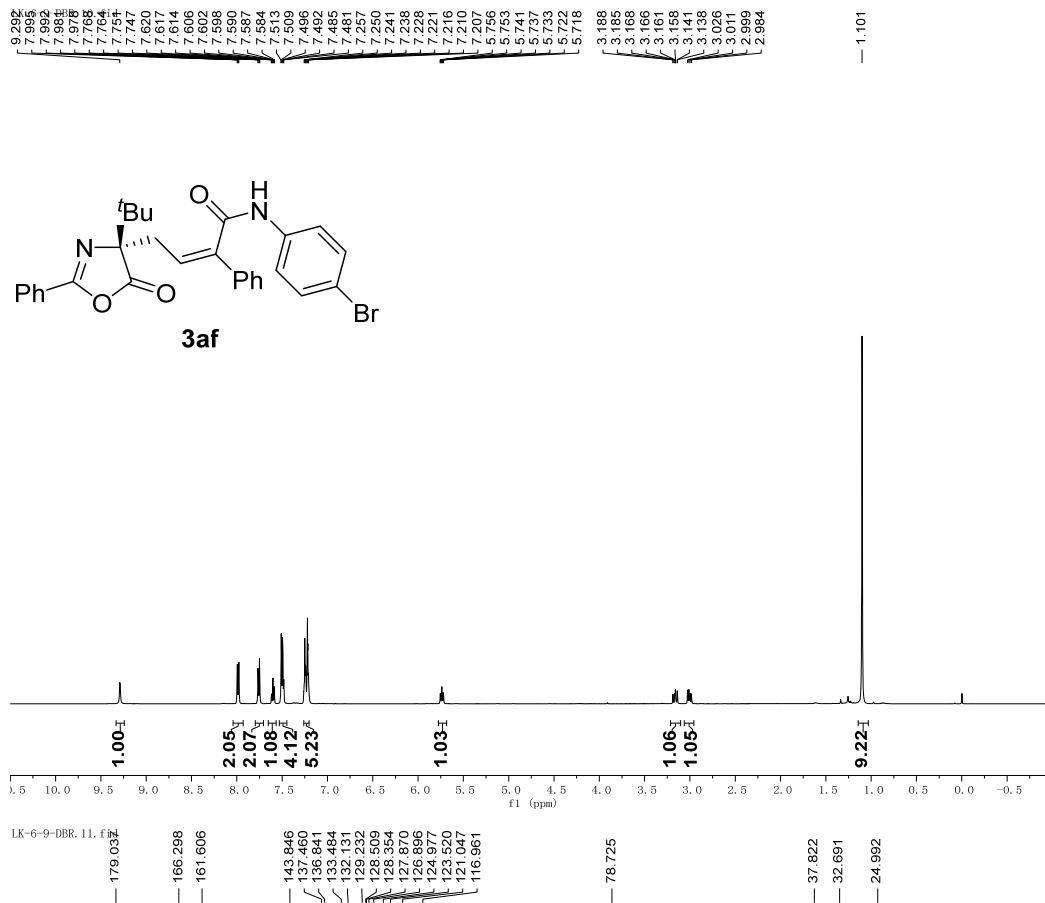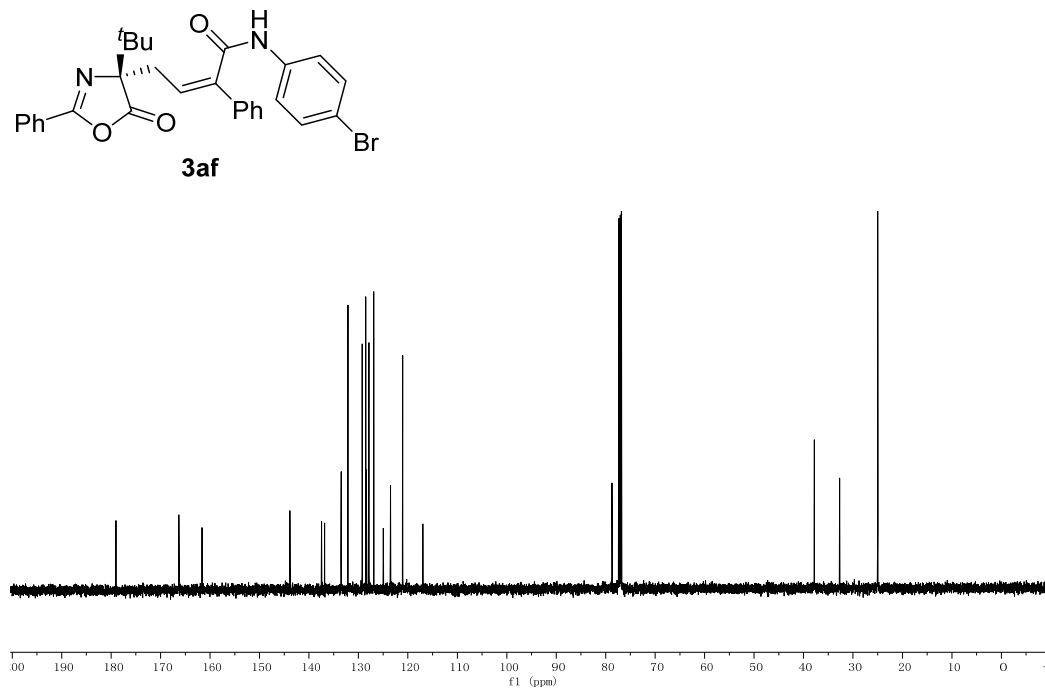

$^1\text{H}$  NMR (500 MHz) and  $^{13}\text{C}$  NMR (125 MHz) spectra of **3af**

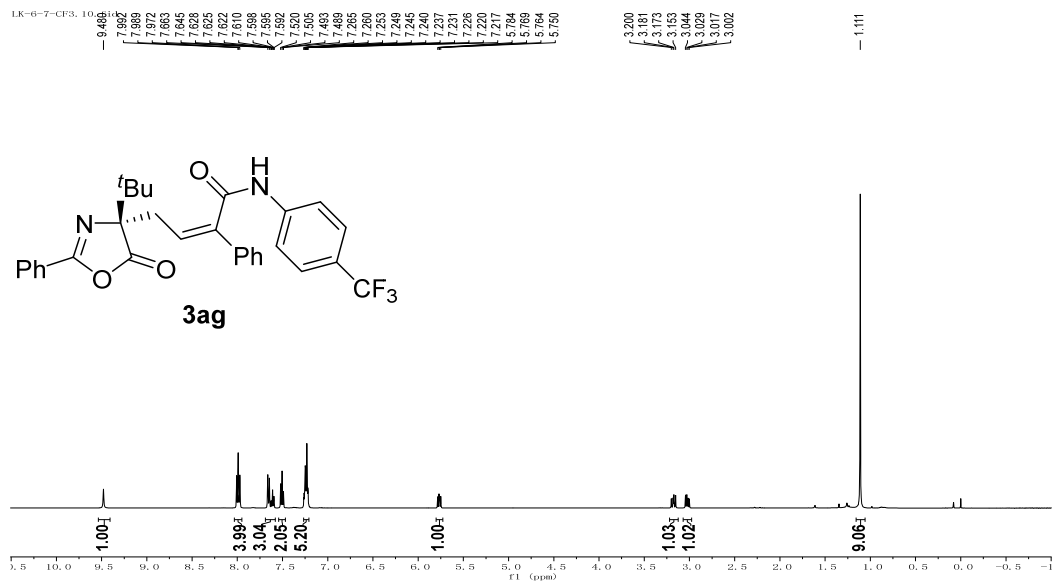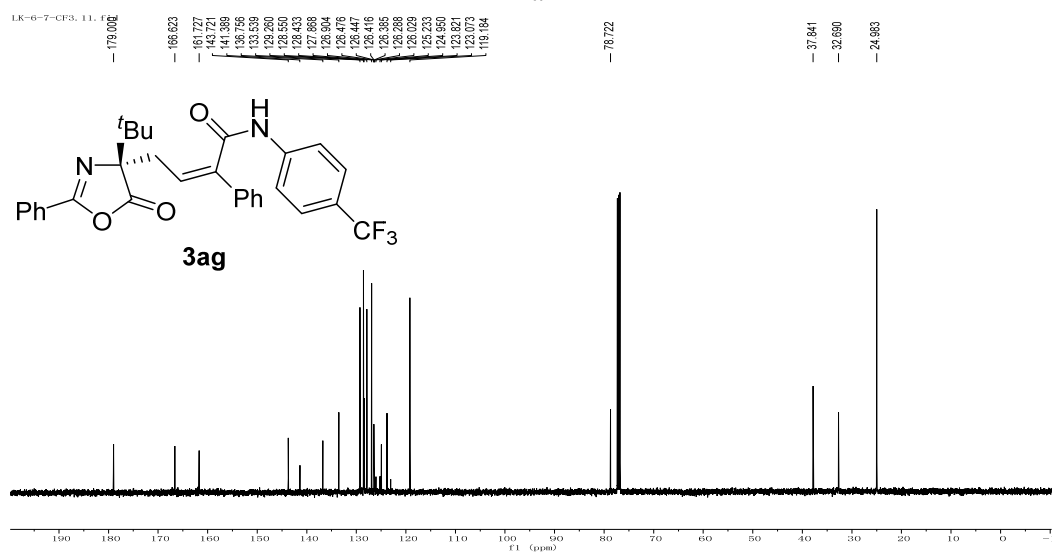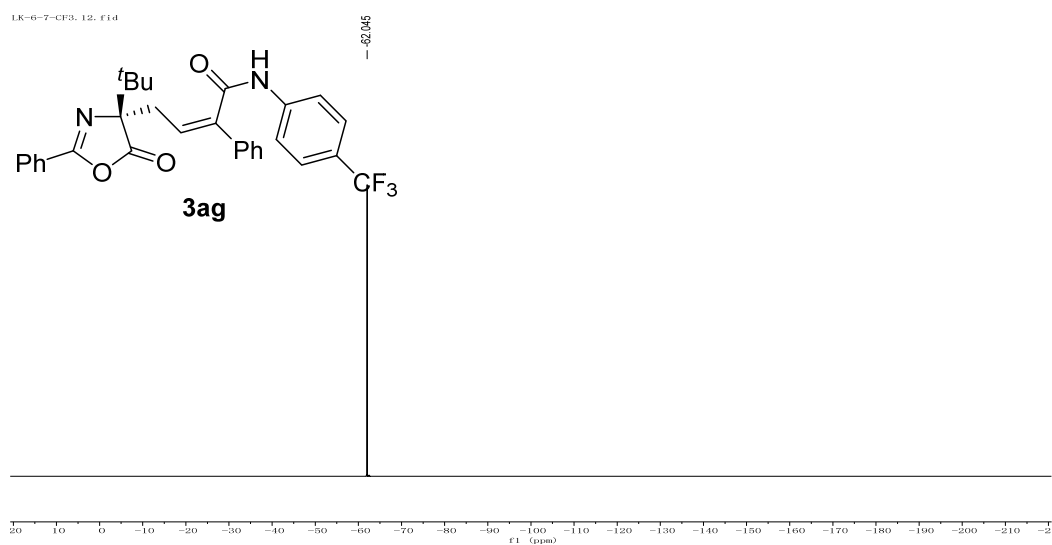

<sup>1</sup>H NMR (500 MHz), <sup>13</sup>C NMR (125 MHz) and <sup>19</sup>F NMR (470 MHz) spectra of **3ag**

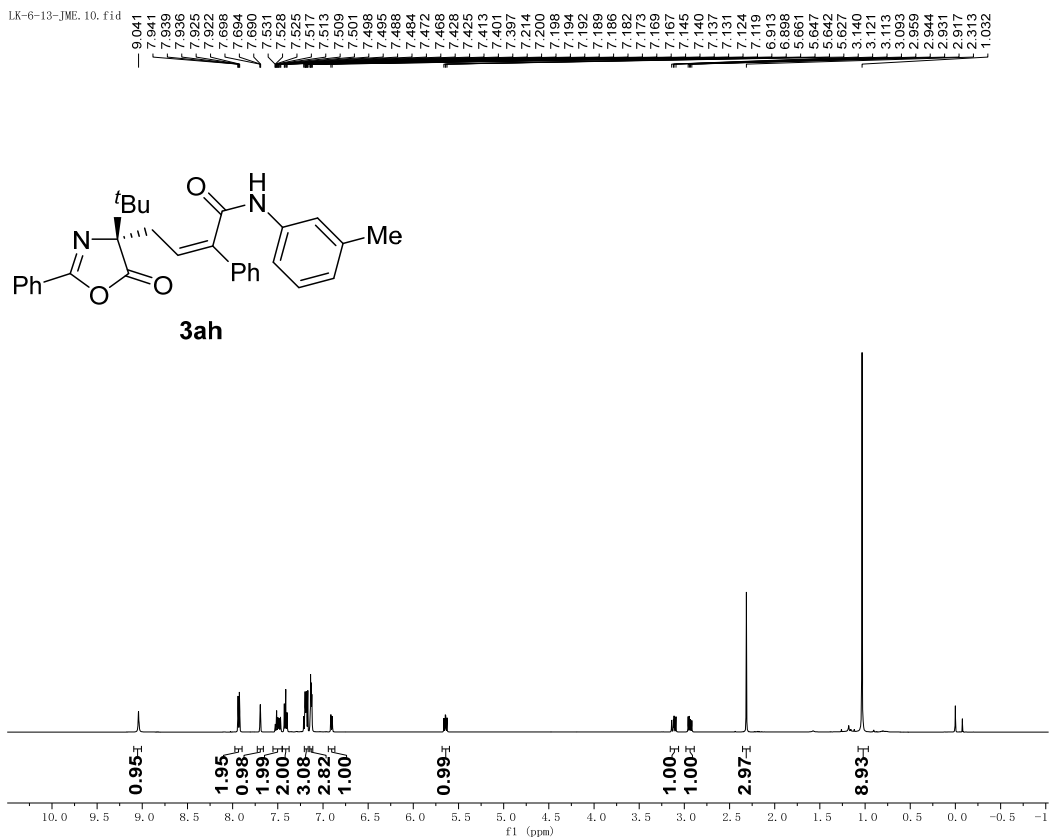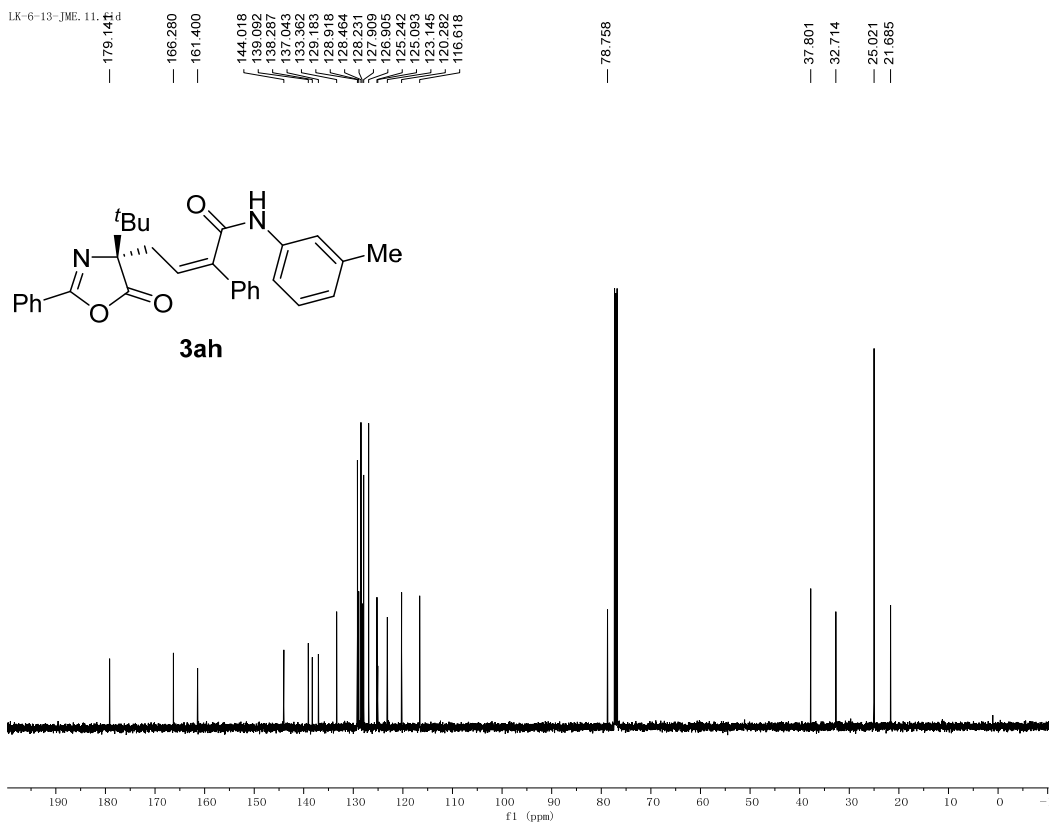

<sup>1</sup>H NMR (500 MHz) and <sup>13</sup>C NMR (125 MHz) spectra of **3ah**

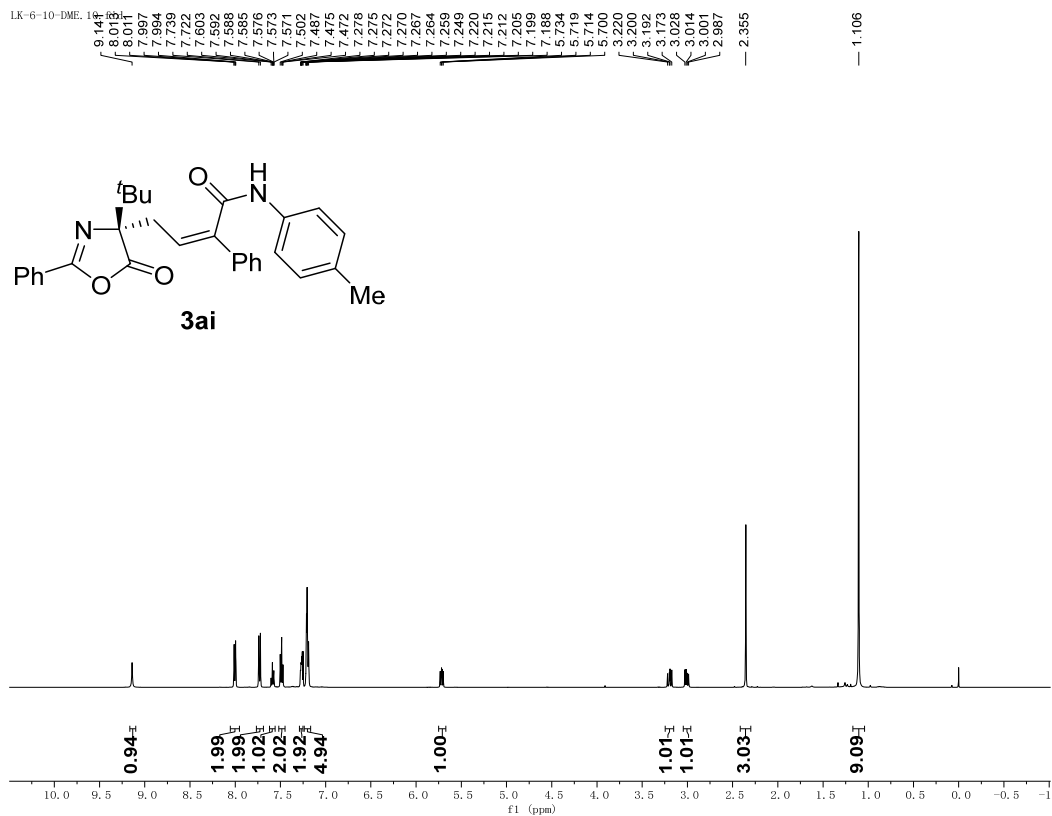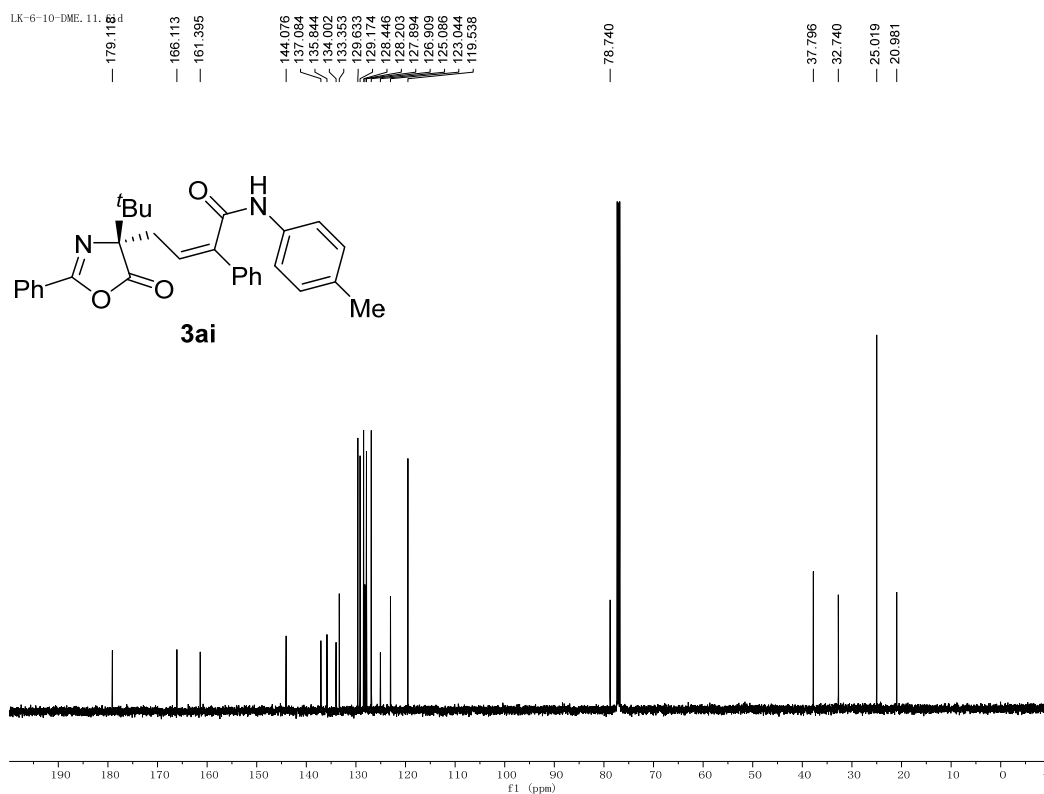

$^1\text{H}$  NMR (500 MHz) and  $^{13}\text{C}$  NMR (125 MHz) spectra of **3ai**

LK-5-154-JOME.10.f

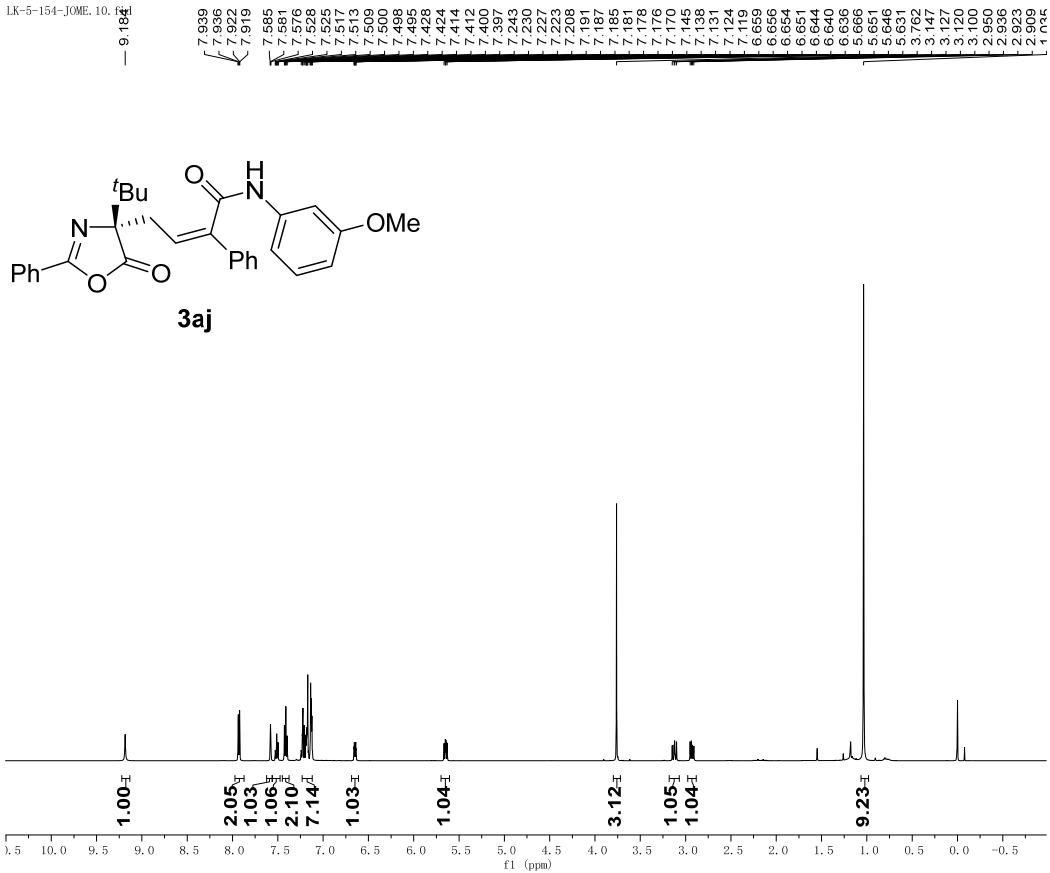

LK-5-154-JOME.10.fid

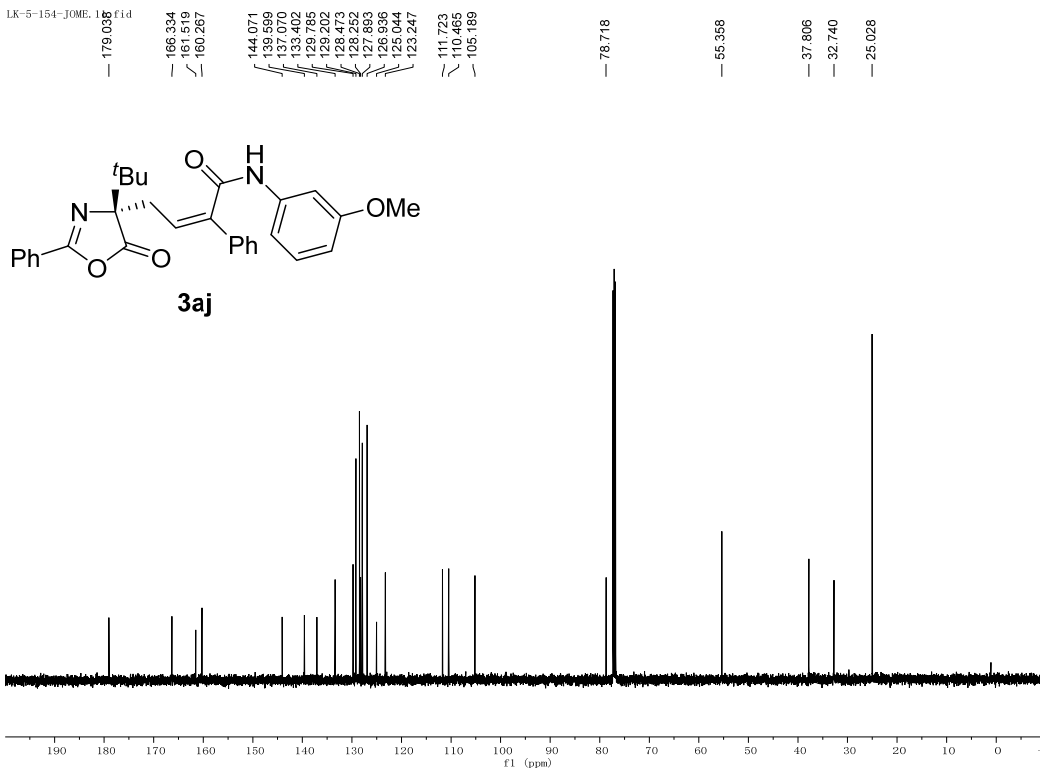

<sup>1</sup>H NMR (500 MHz) and <sup>13</sup>C NMR (125 MHz) spectra of **3aj**



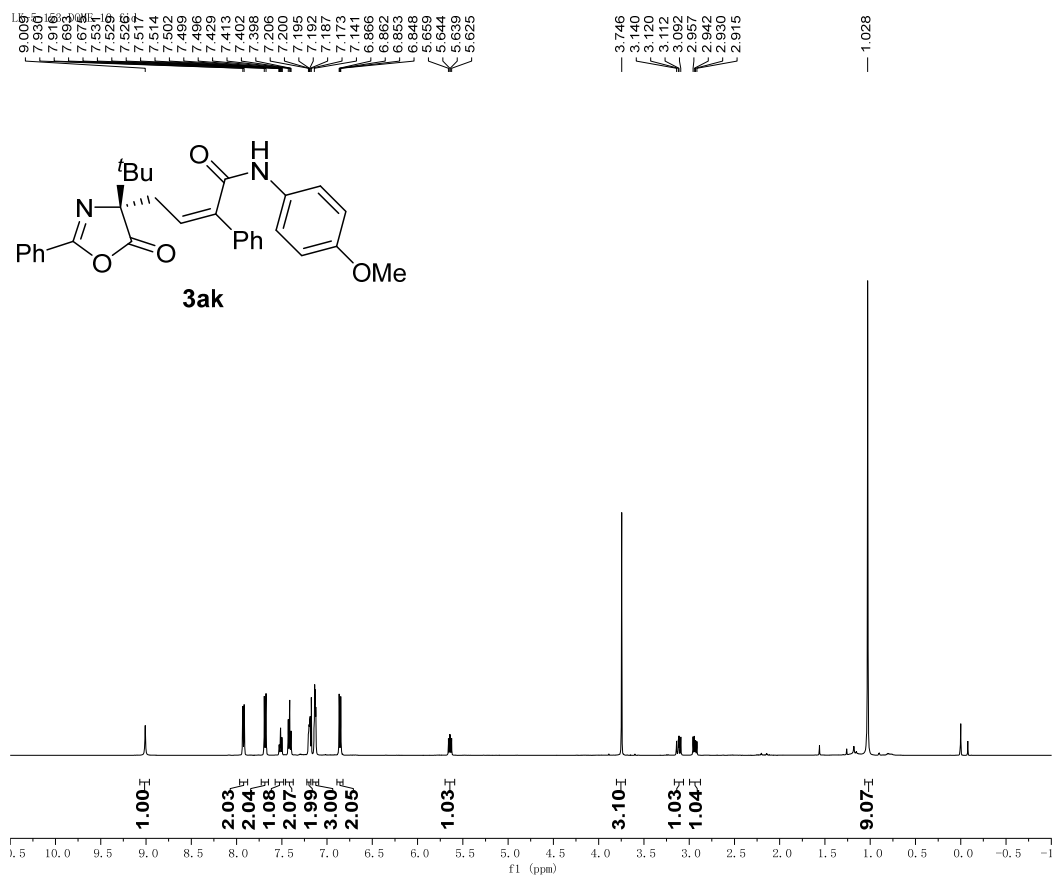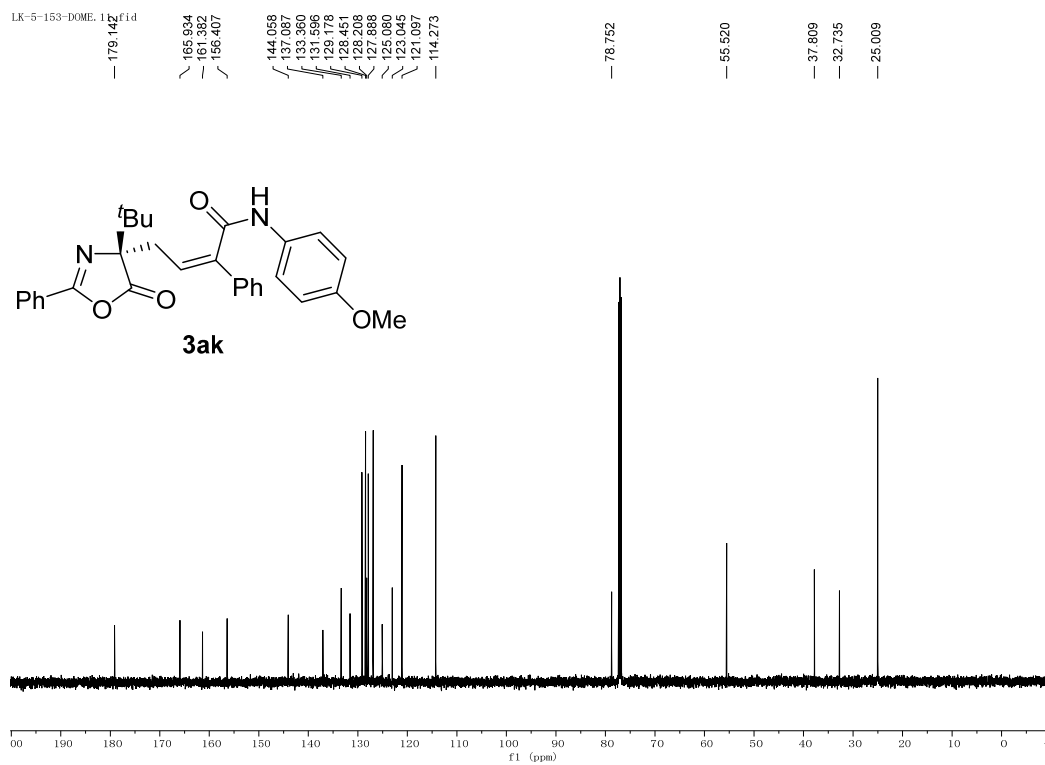

<sup>1</sup>H NMR (500 MHz) and <sup>13</sup>C NMR (125 MHz) spectra of **3ak**

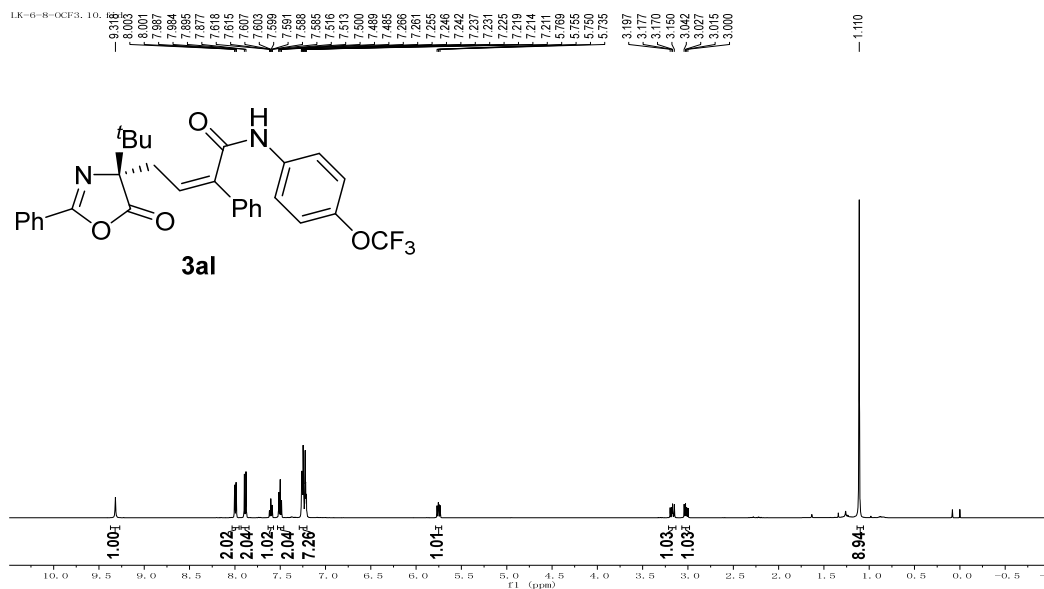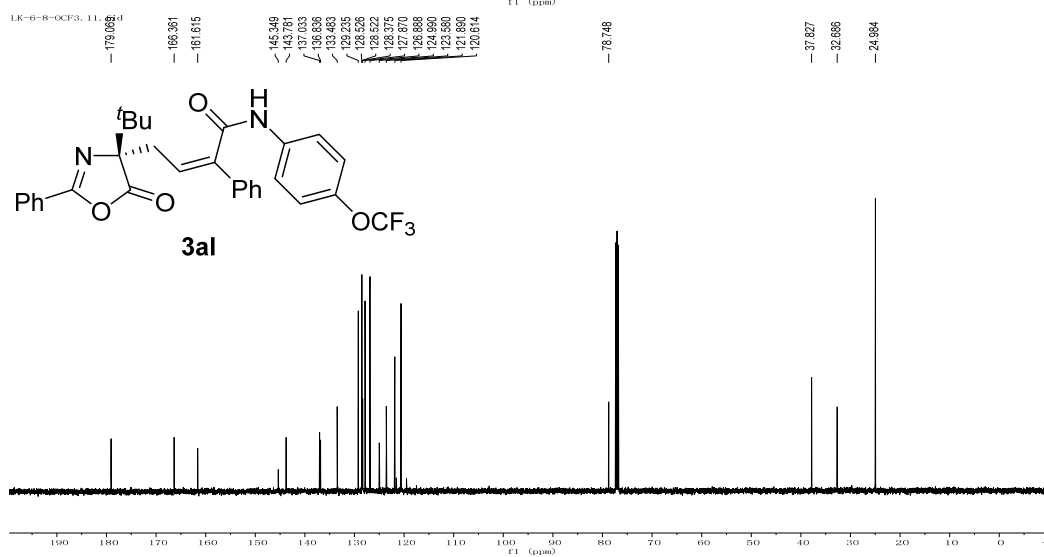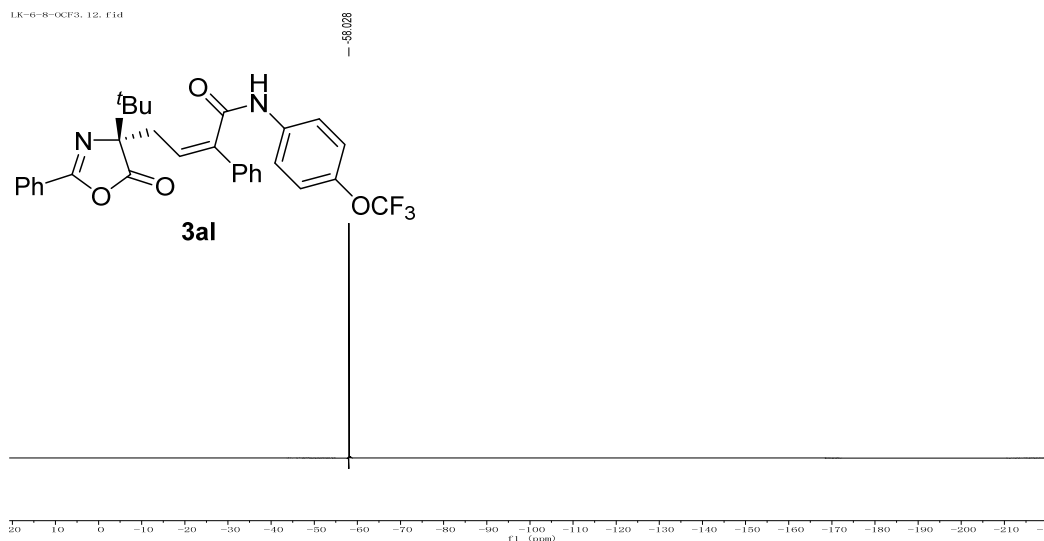

<sup>1</sup>H NMR (500 MHz), <sup>13</sup>C NMR (125 MHz) and <sup>19</sup>F NMR (470 MHz) spectra of **3al**



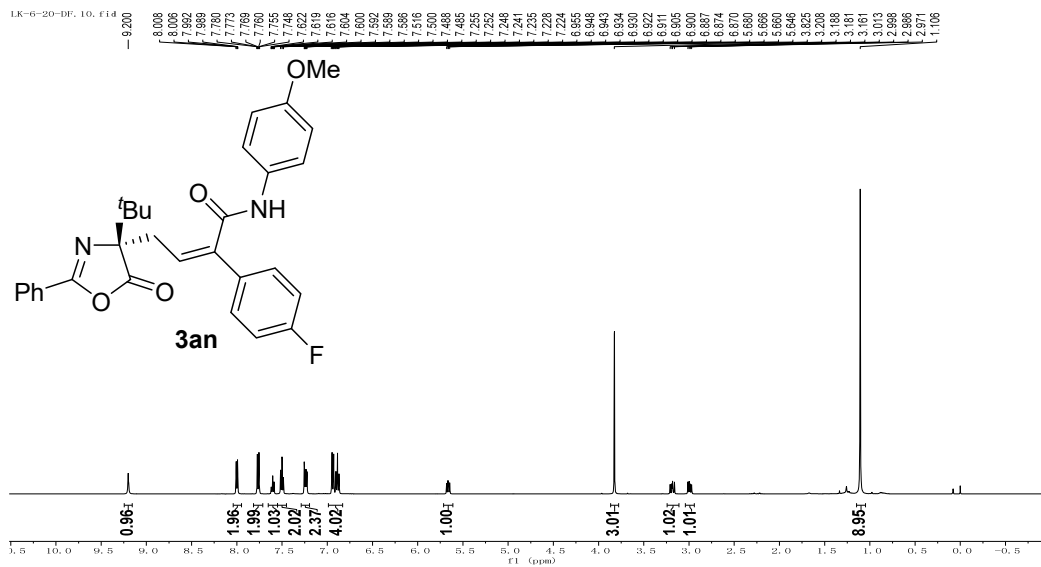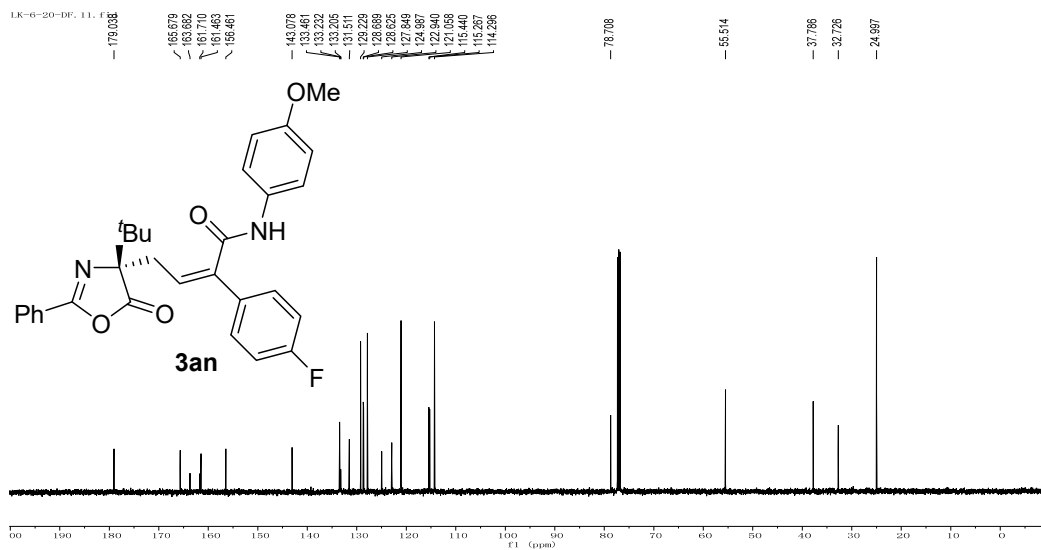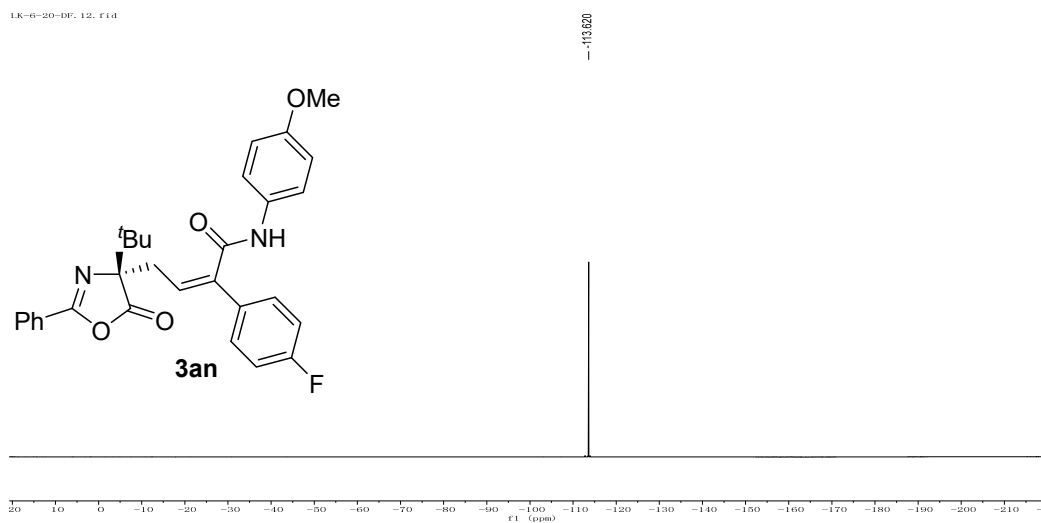

<sup>1</sup>H NMR (500 MHz), <sup>13</sup>C NMR (125 MHz) and <sup>19</sup>F NMR (470 MHz) spectra of **3an**

LK-6-27-DCL.10.f1

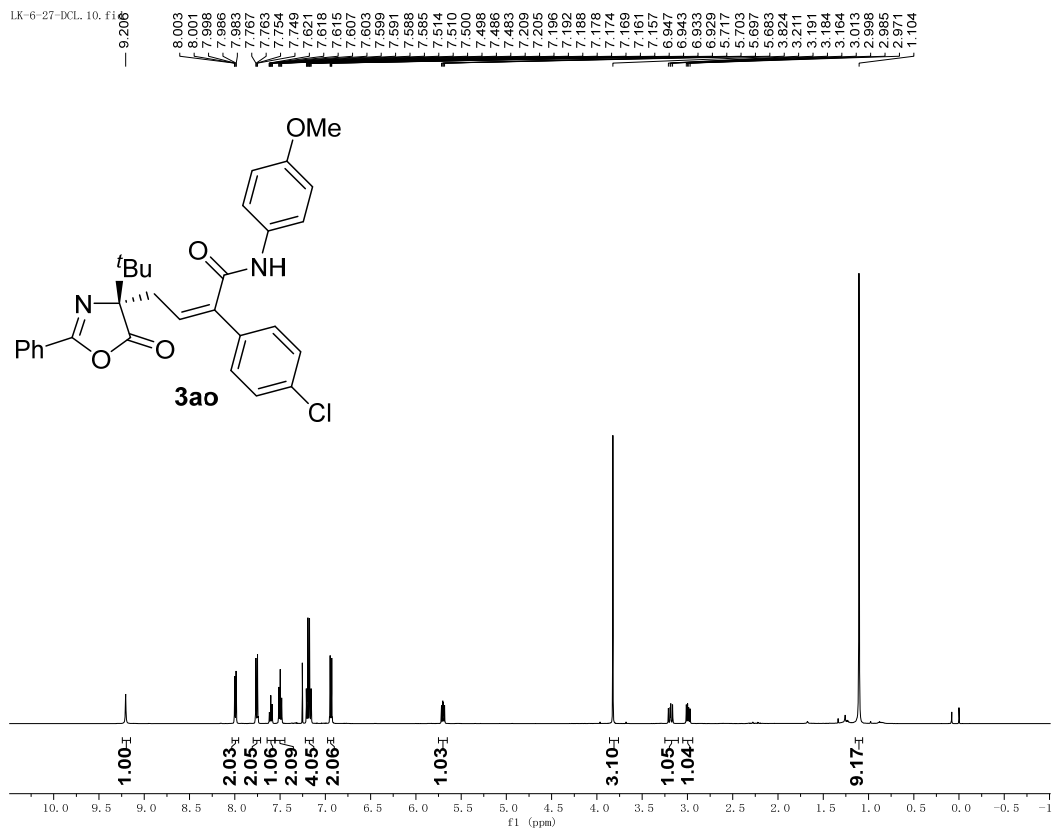

LK-6-27-DCL.11.f1

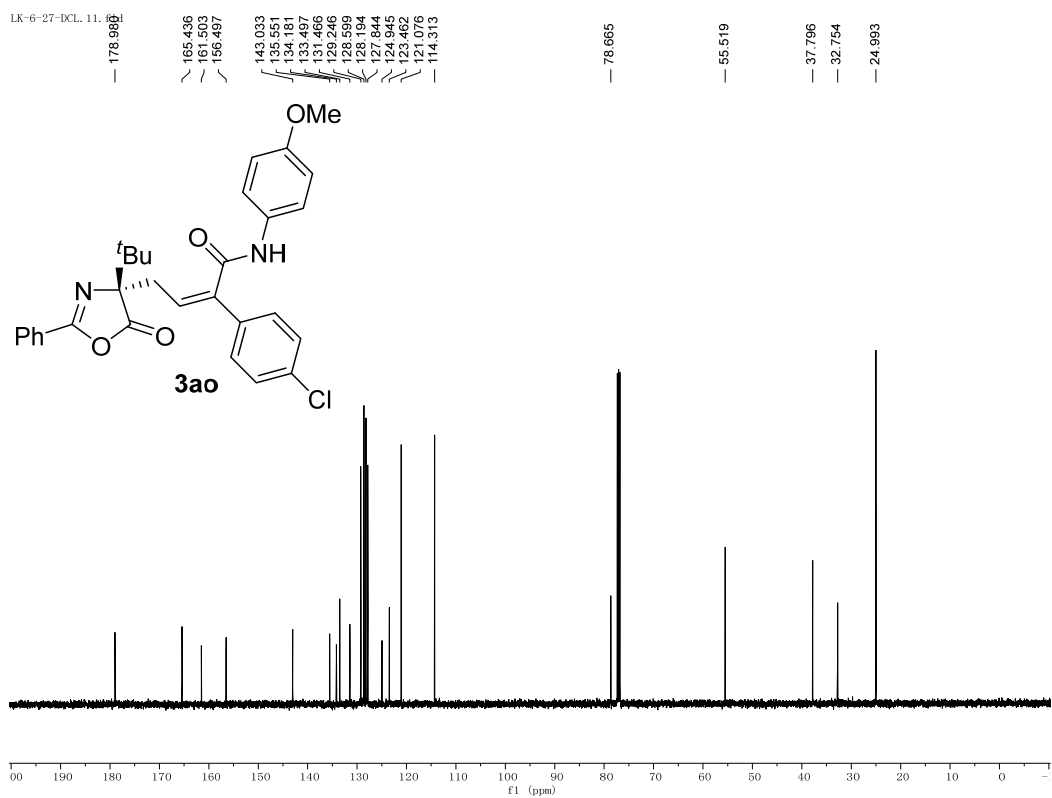

<sup>1</sup>H NMR (500 MHz) and <sup>13</sup>C NMR (125 MHz) spectra of **3ao**

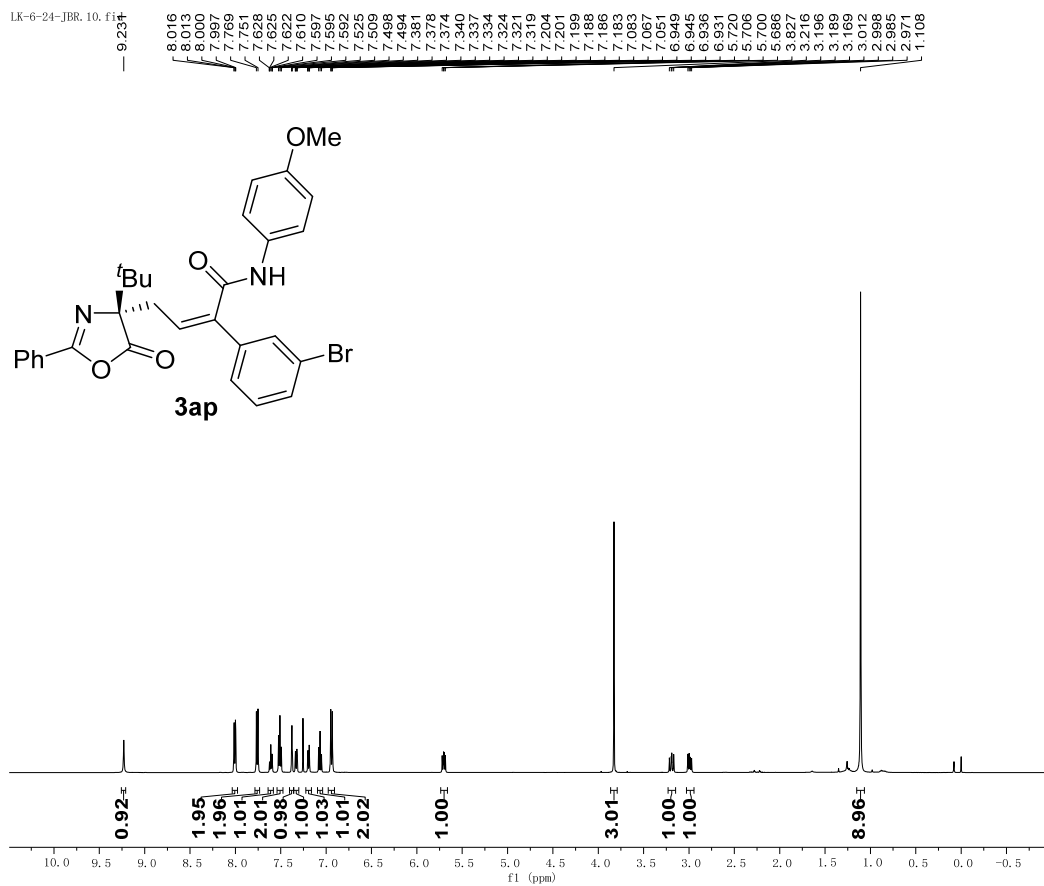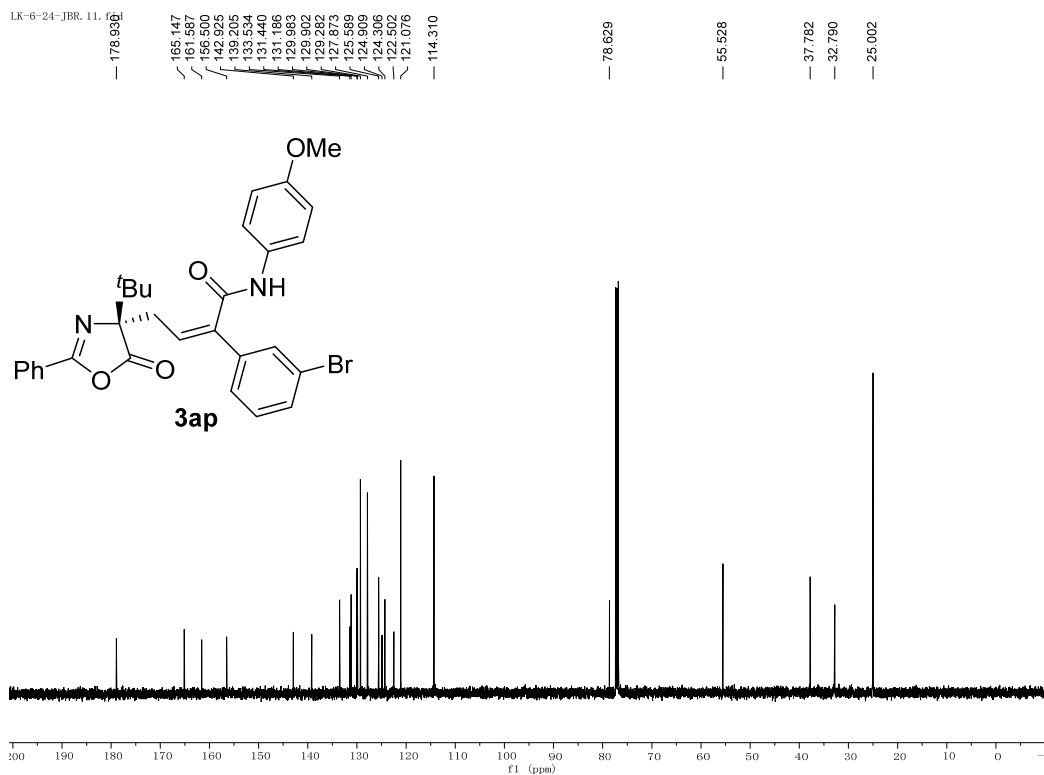

<sup>1</sup>H NMR (500 MHz) and <sup>13</sup>C NMR (125 MHz) spectra of **3ap**

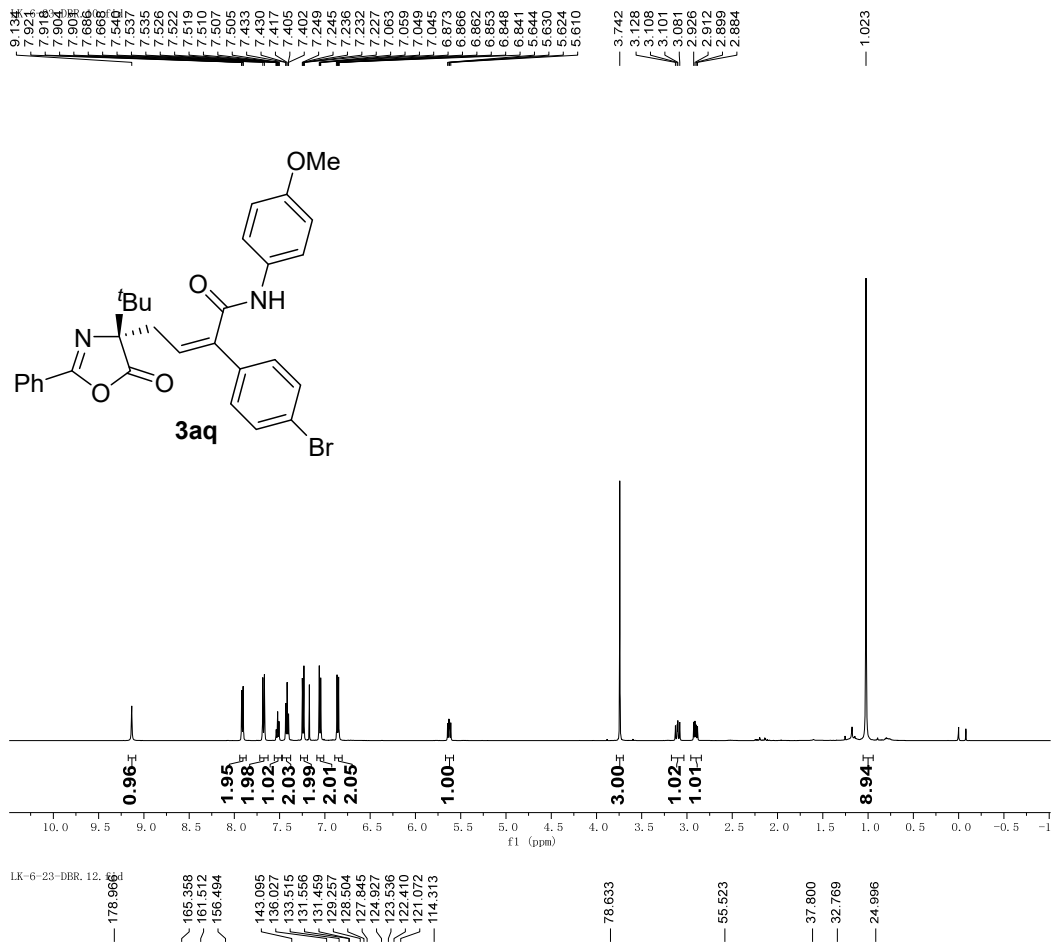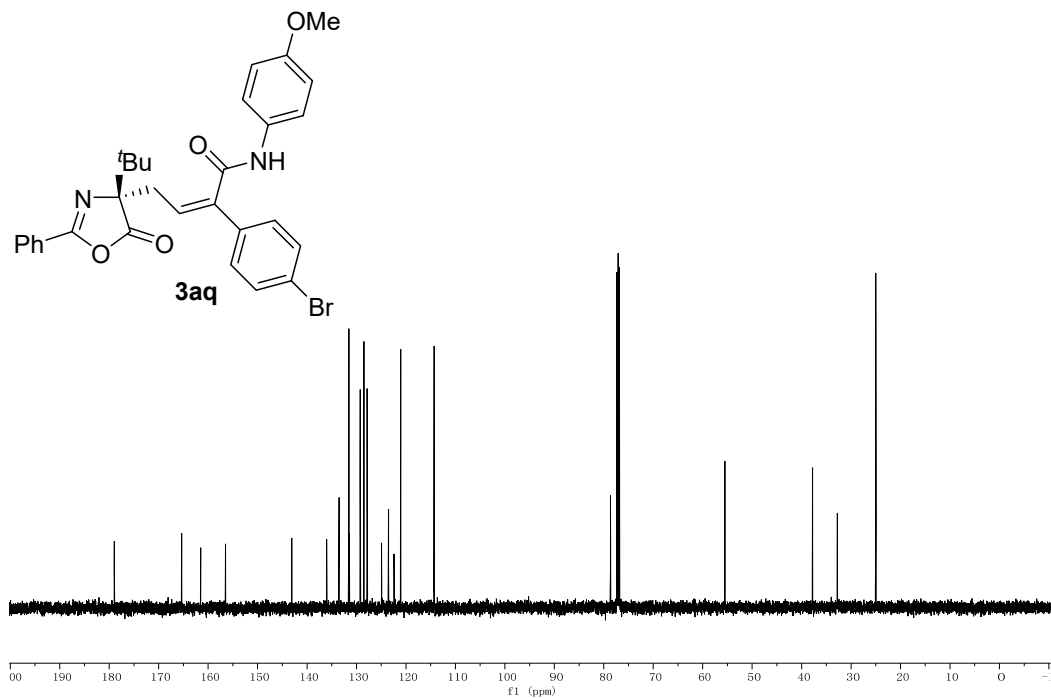

<sup>1</sup>H NMR (500 MHz) and <sup>13</sup>C NMR (125 MHz) spectra of **3aq**

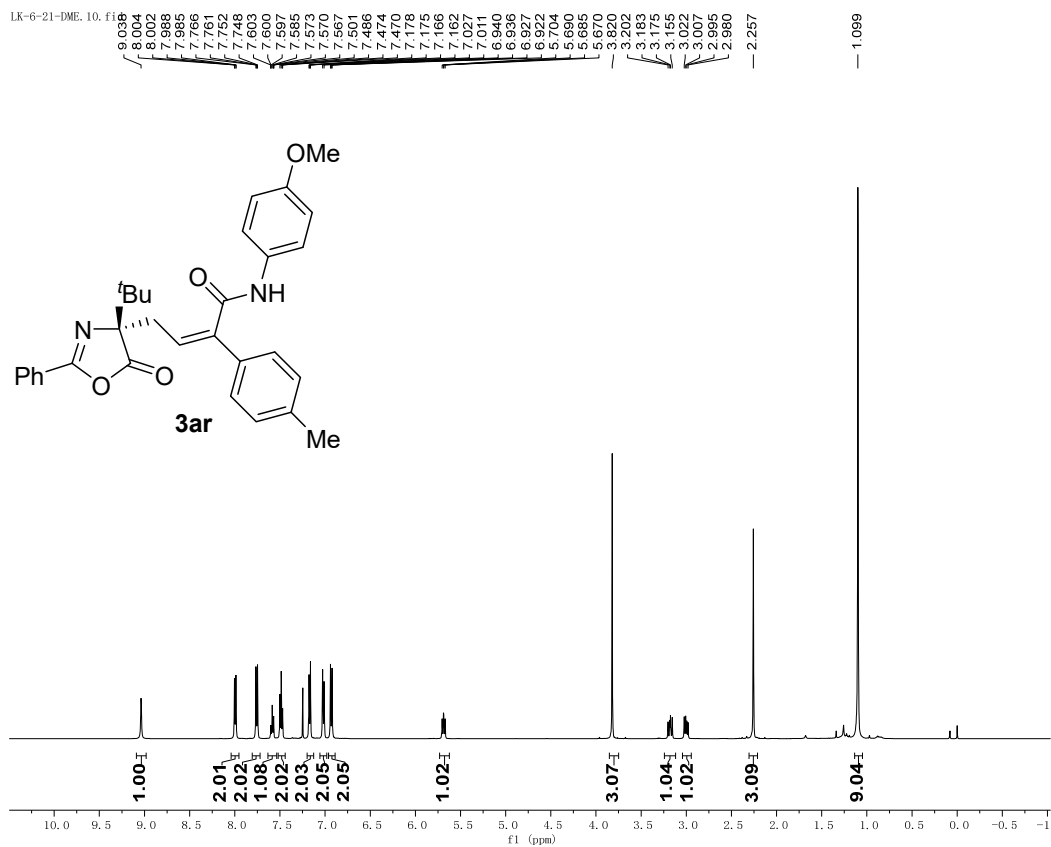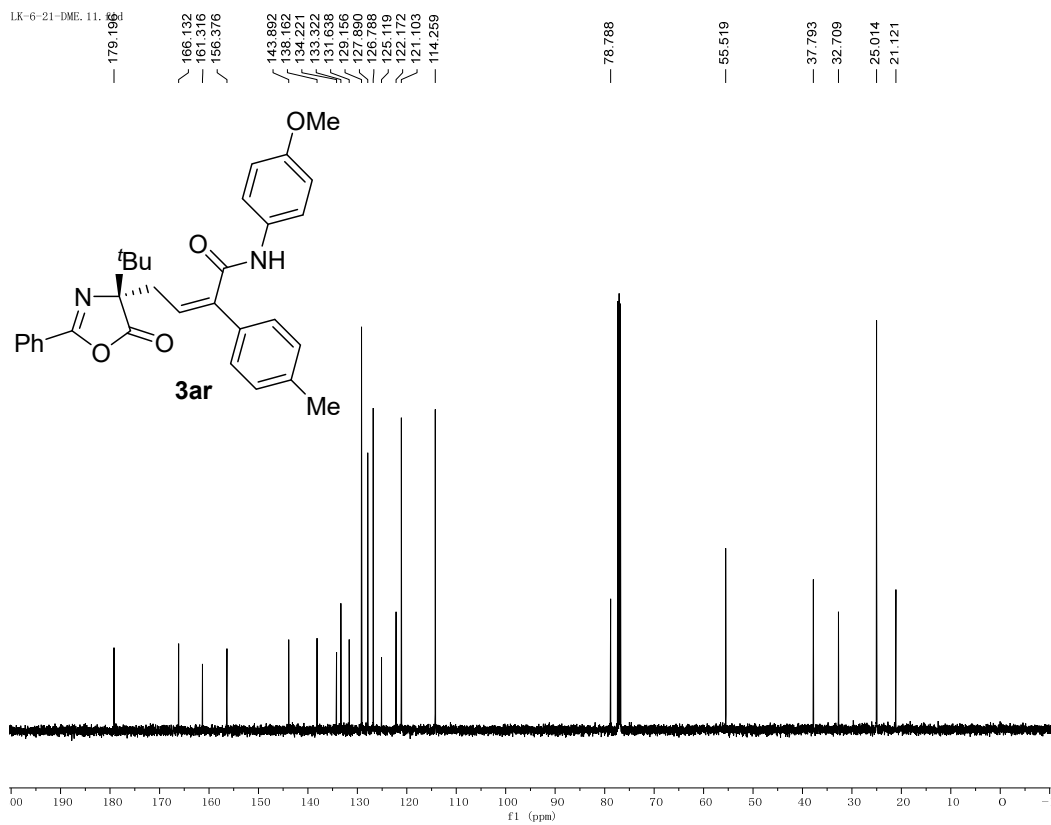

<sup>1</sup>H NMR (500 MHz) and <sup>13</sup>C NMR (125 MHz) spectra of **3ar**



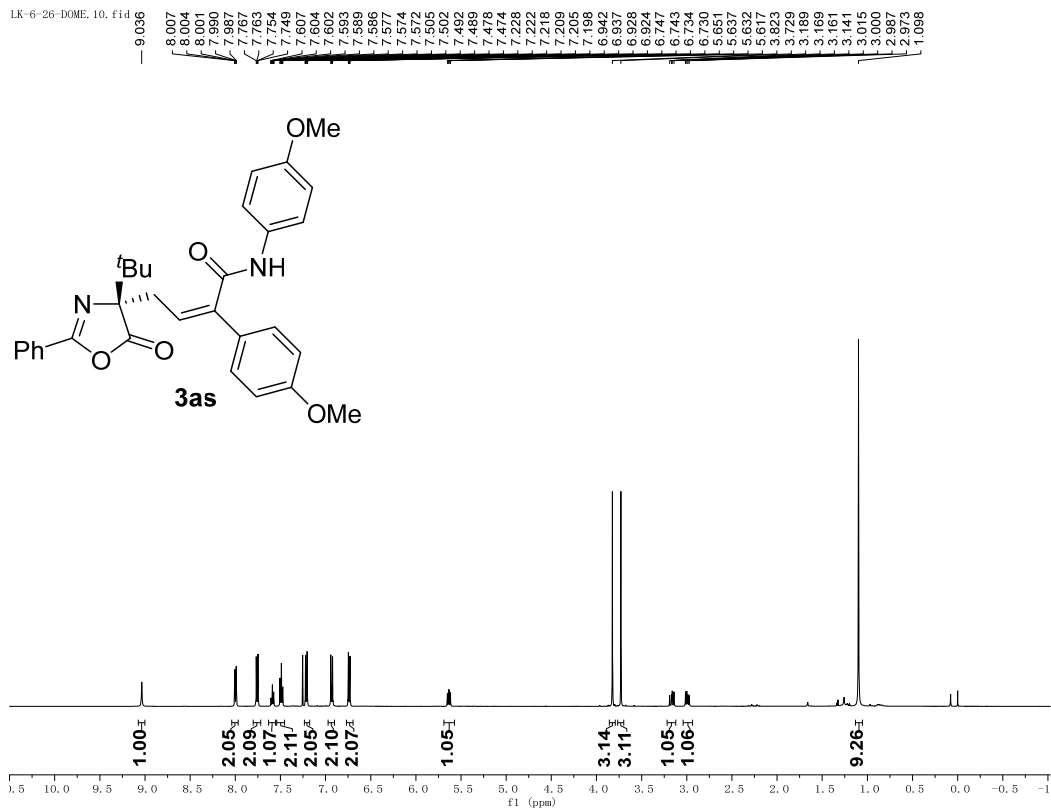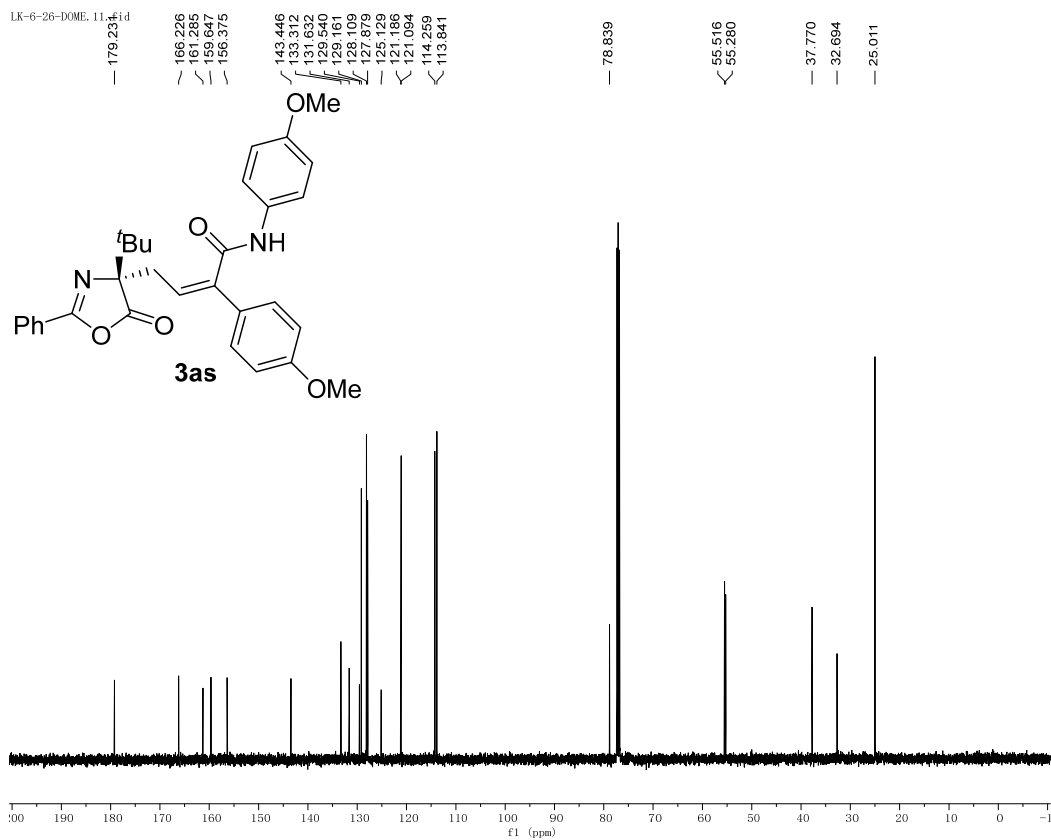

$^1\text{H}$  NMR (500 MHz) and  $^{13}\text{C}$  NMR (125 MHz) spectra of **3as**

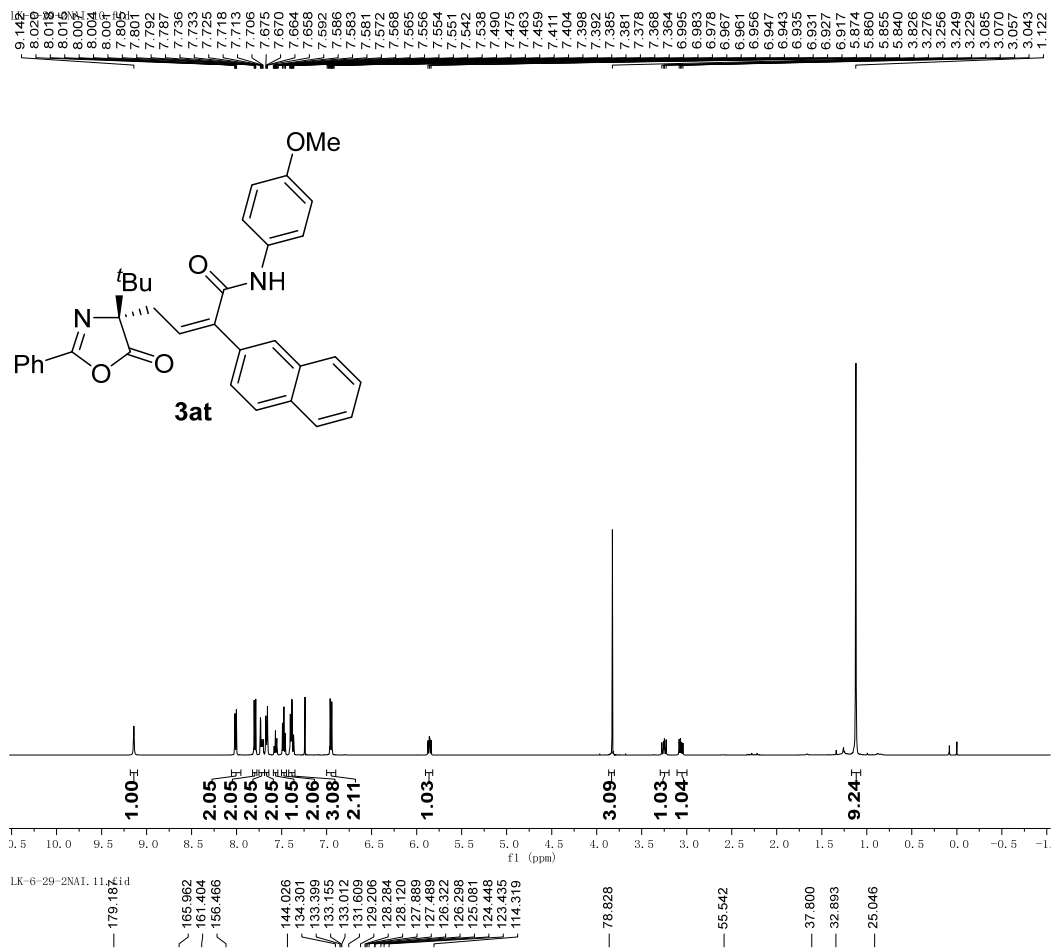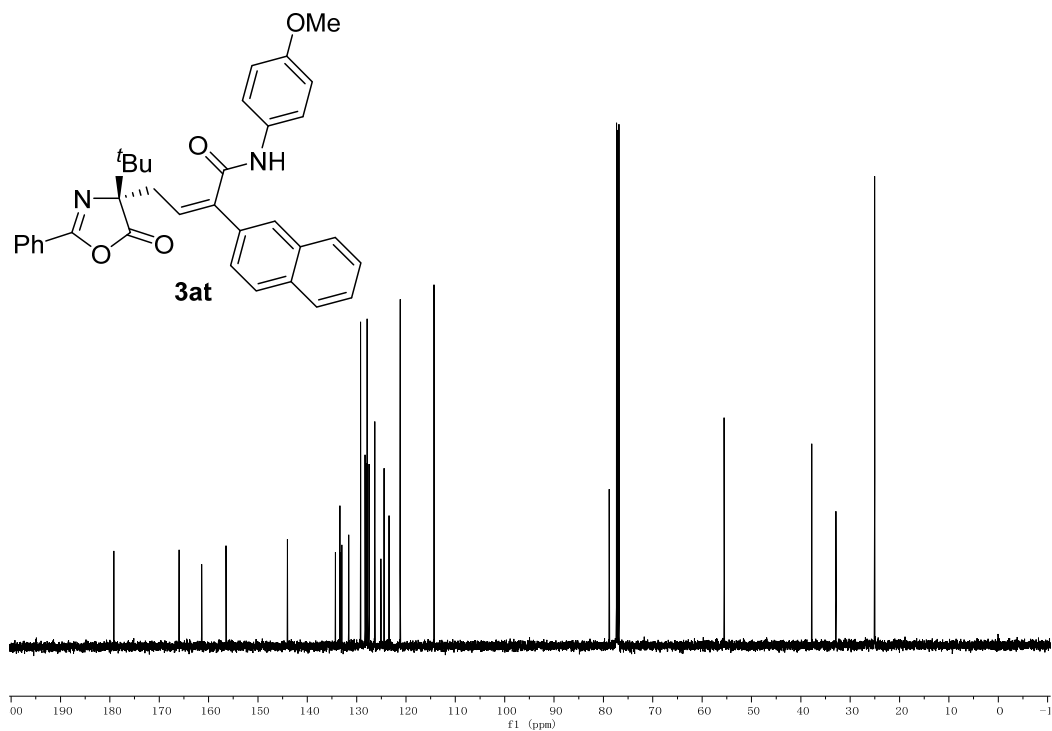

<sup>1</sup>H NMR (500 MHz) and <sup>13</sup>C NMR (125 MHz) spectra of 3at

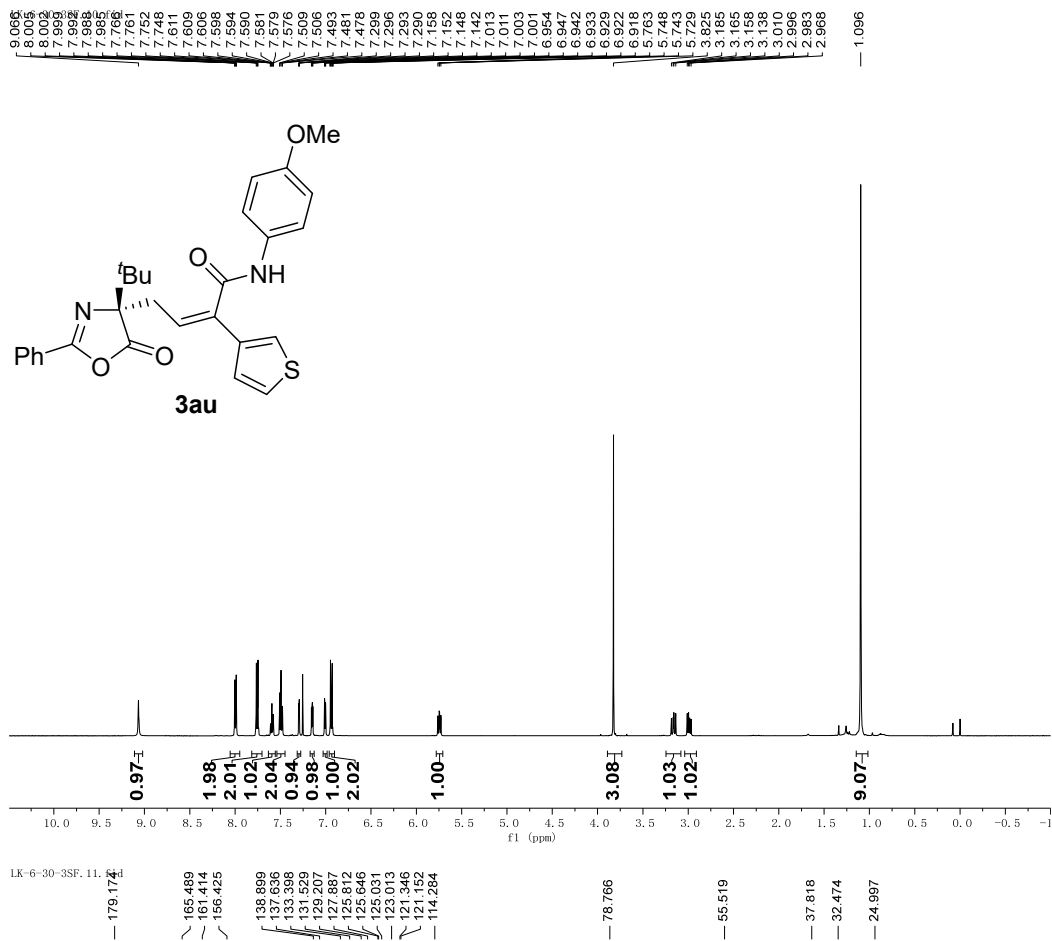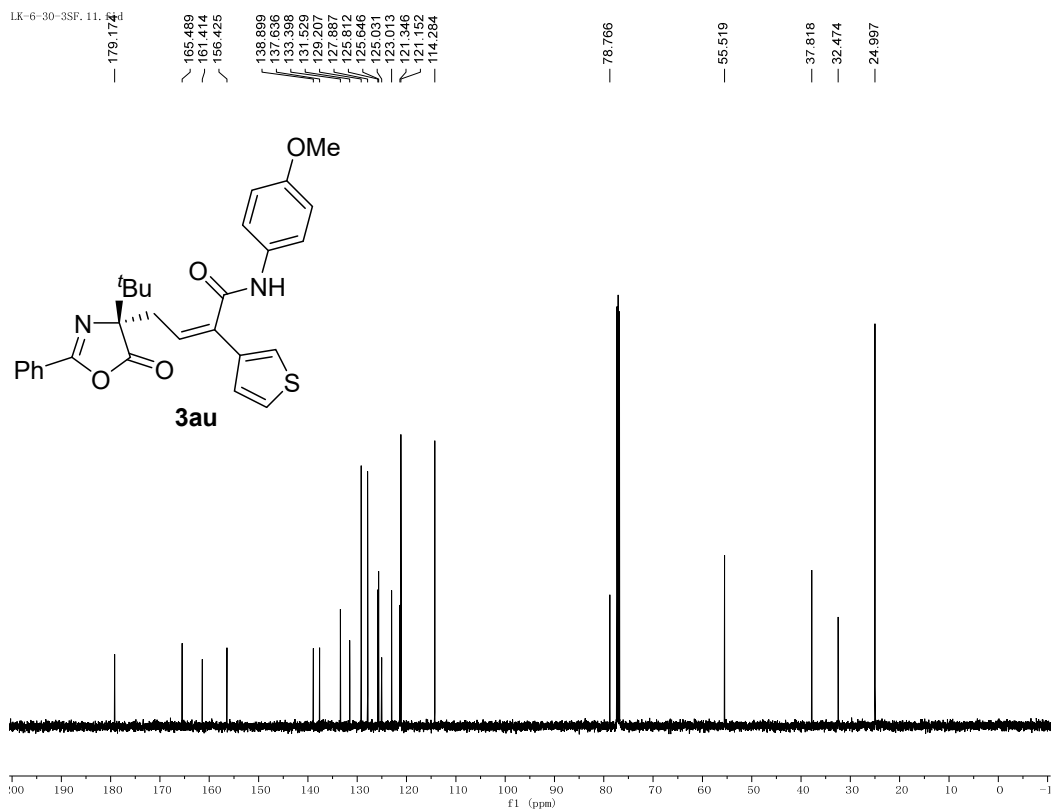

<sup>1</sup>H NMR (500 MHz) and <sup>13</sup>C NMR (125 MHz) spectra of **3au**

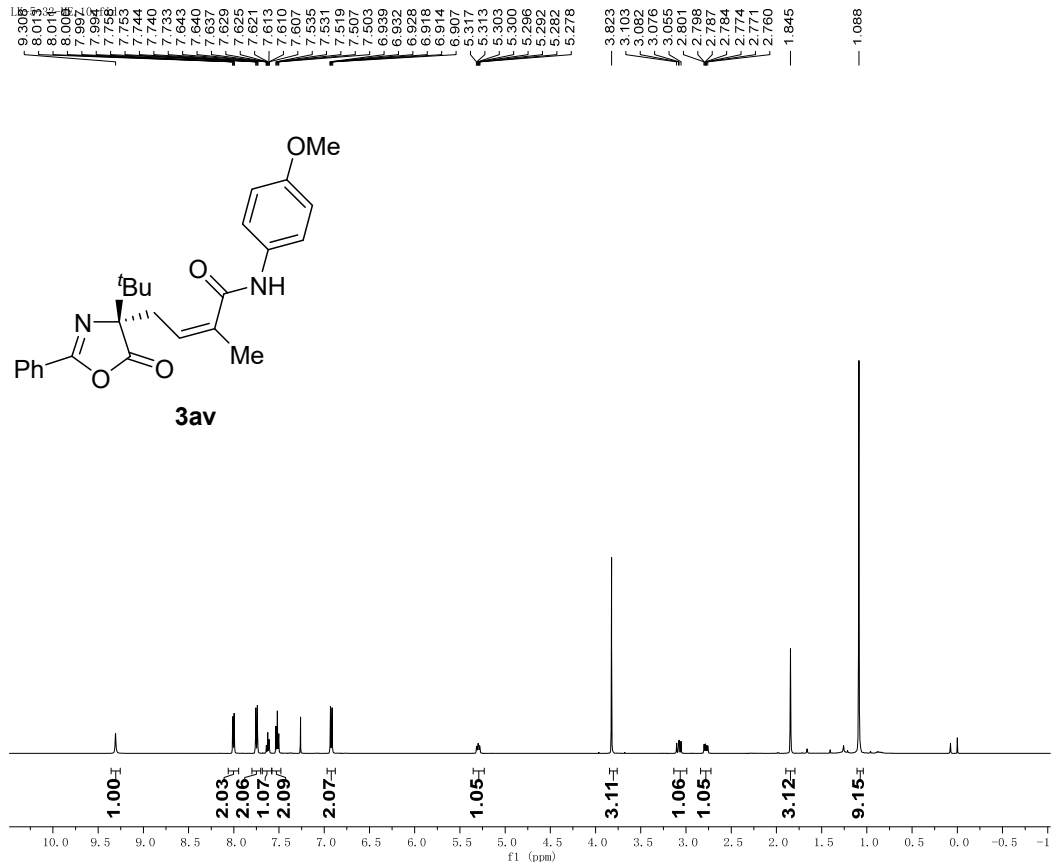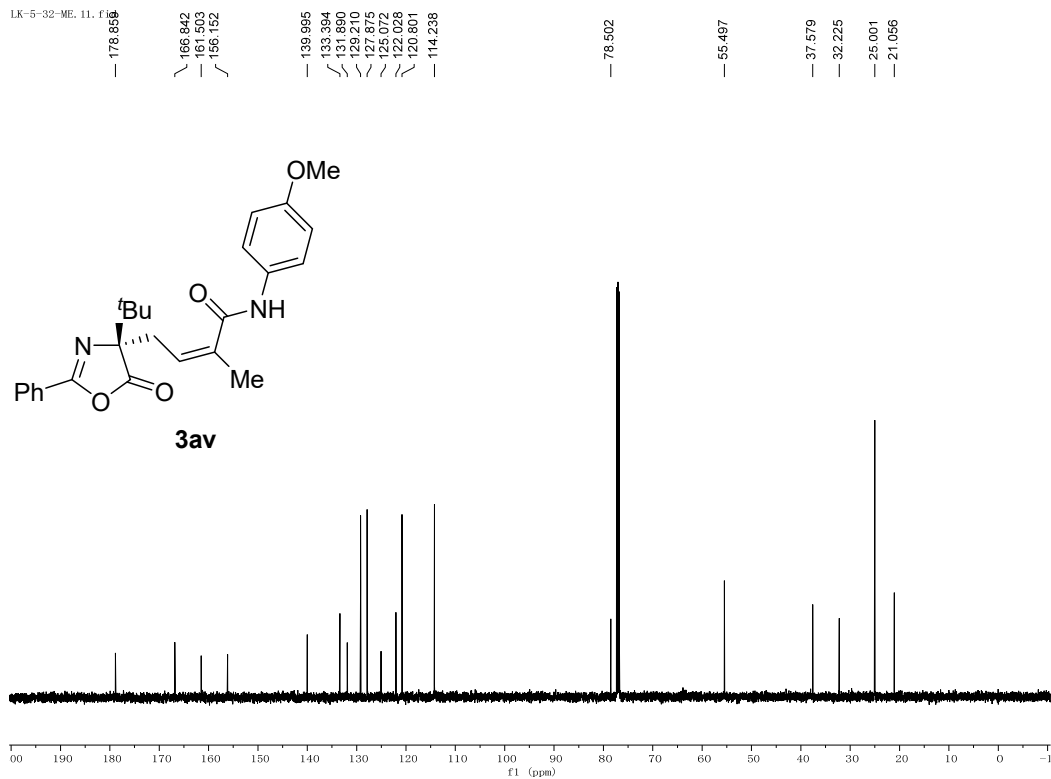

<sup>1</sup>H NMR (500 MHz) and <sup>13</sup>C NMR (125 MHz) spectra of **3av**

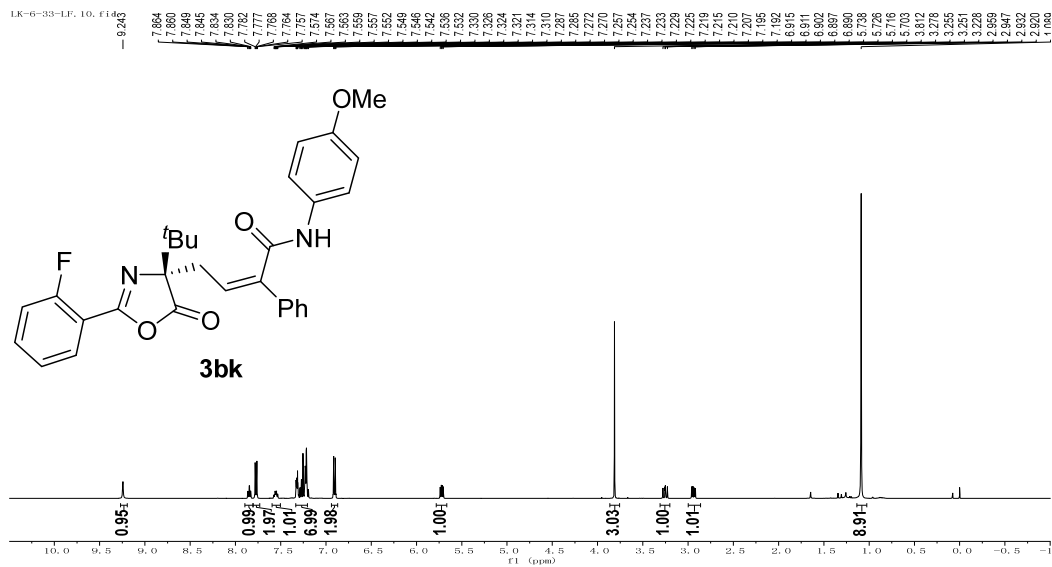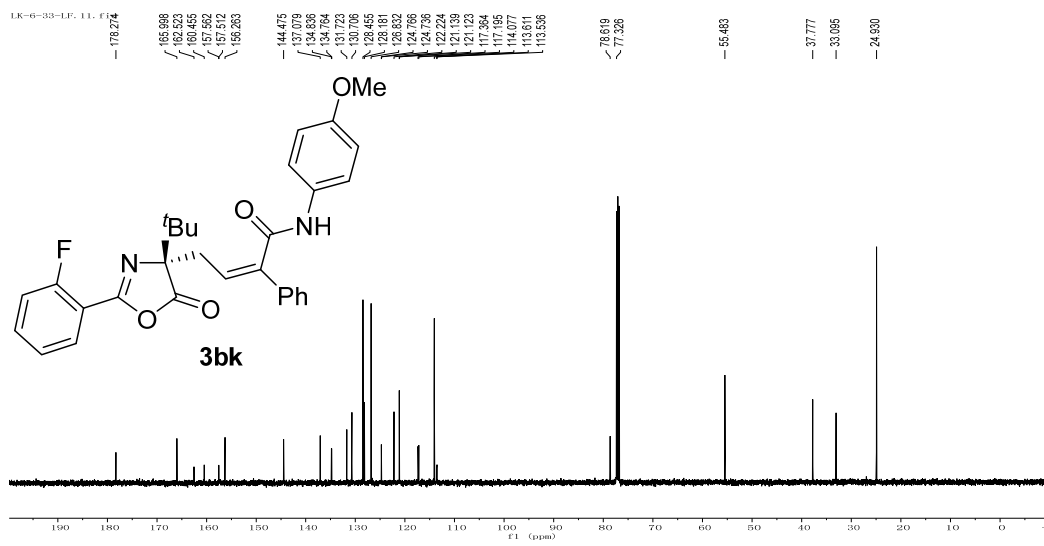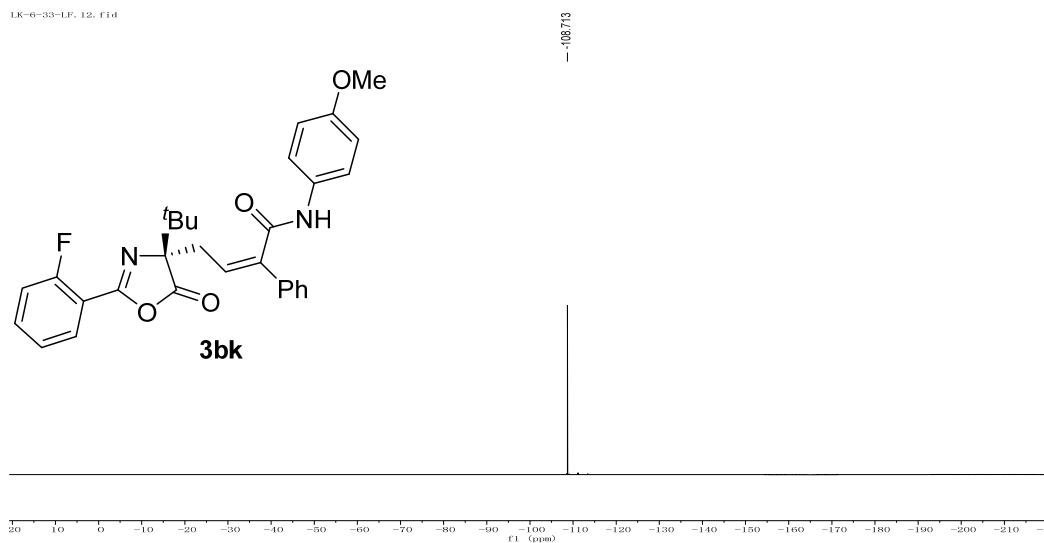

<sup>1</sup>H NMR (500 MHz), <sup>13</sup>C NMR (125 MHz) and <sup>19</sup>F NMR (125 MHz) spectra of **3bk**

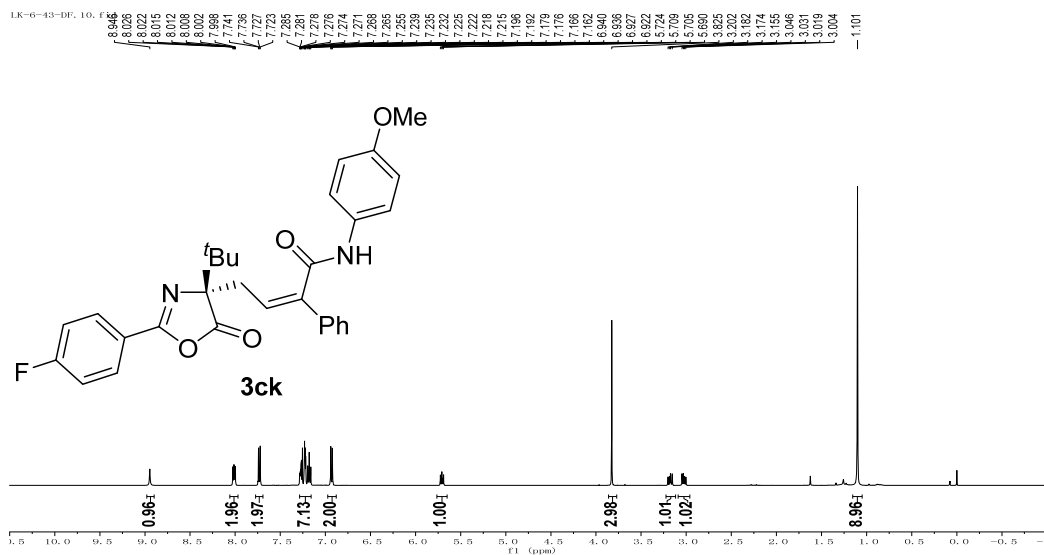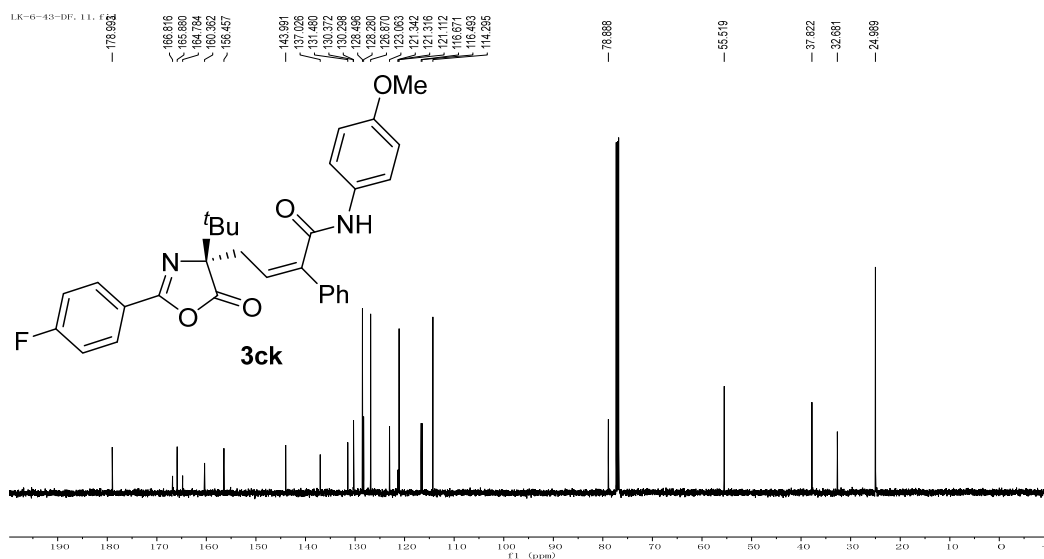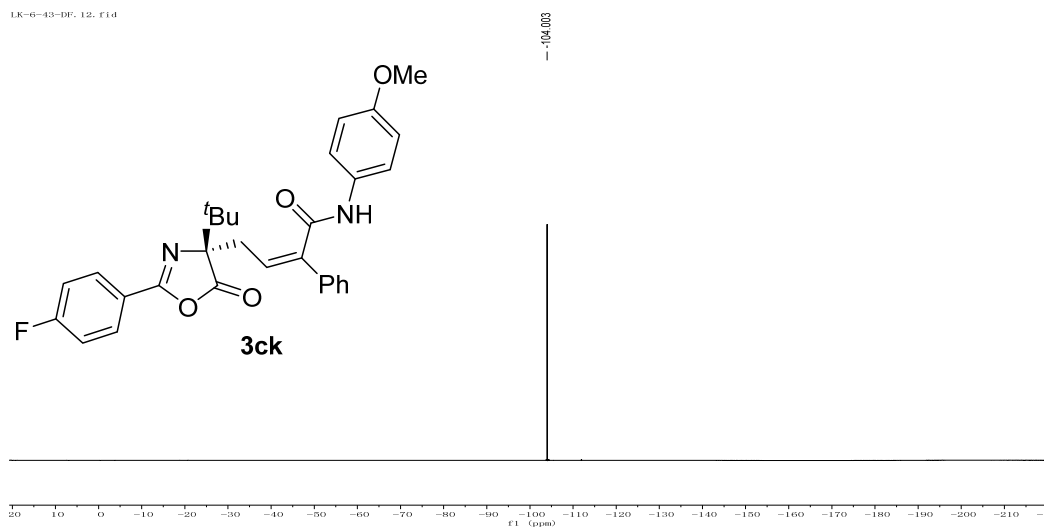

$^1\text{H}$  NMR (500 MHz),  $^{13}\text{C}$  NMR (125 MHz) and  $^{19}\text{F}$  NMR (125 MHz) spectra of **3ck**

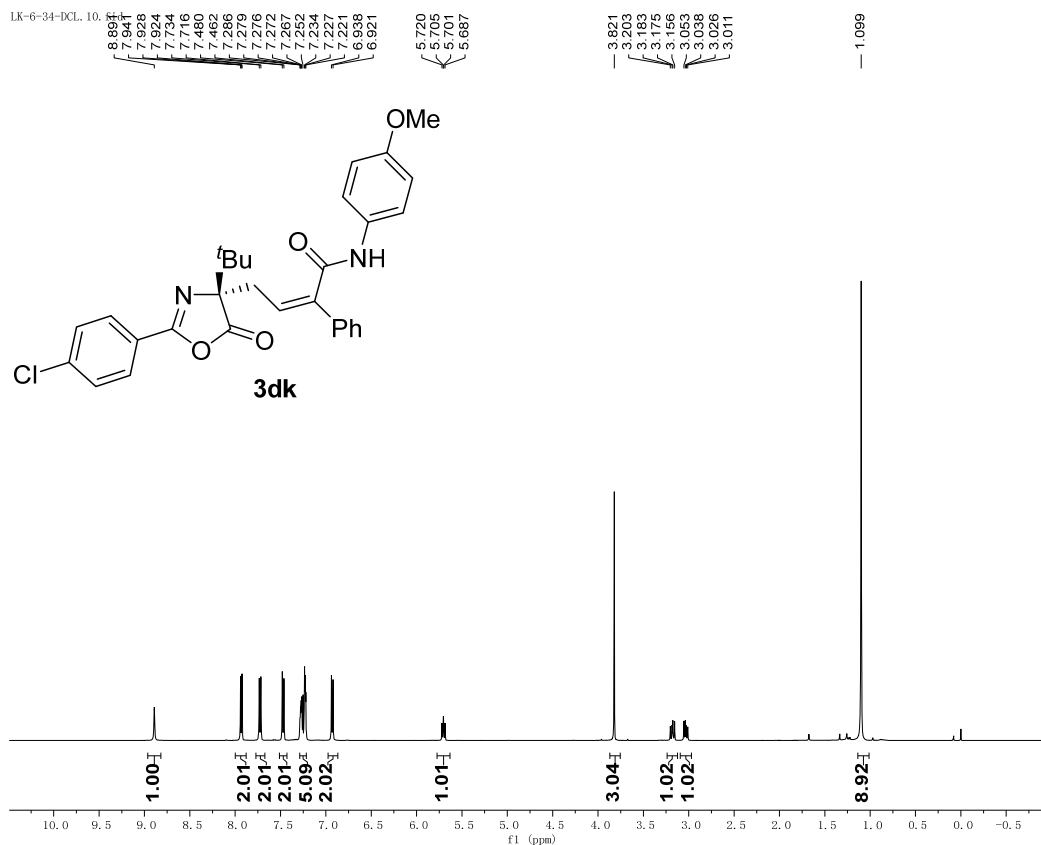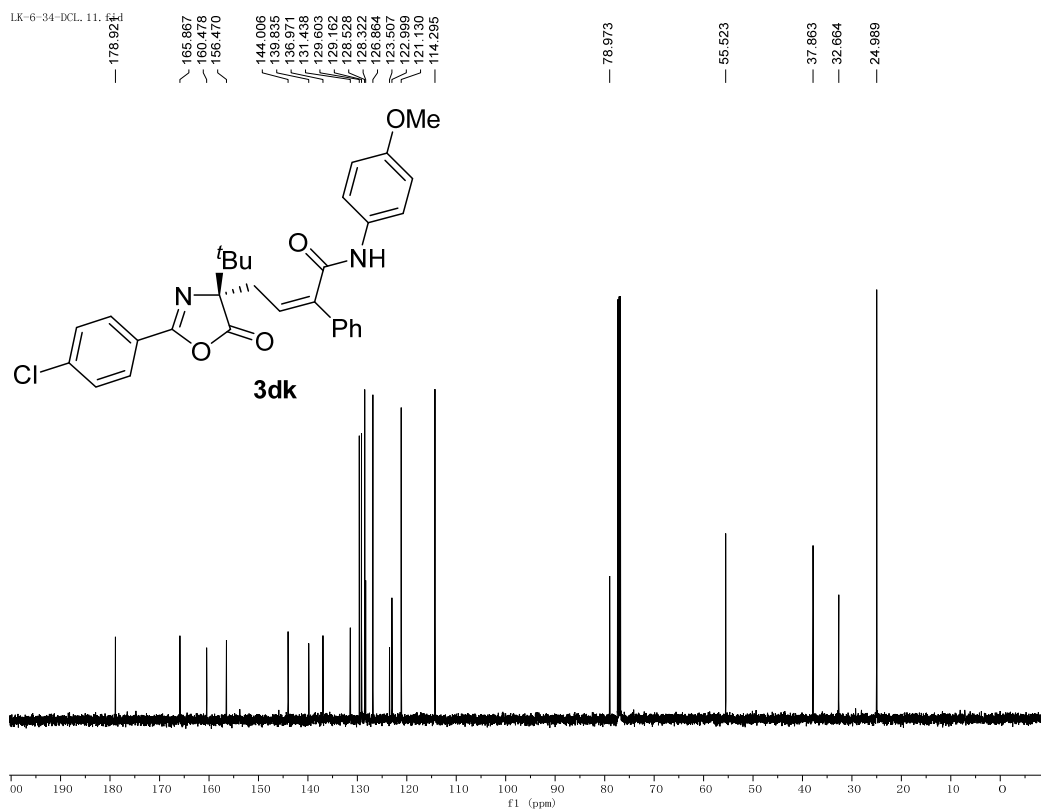

$^1\text{H}$  NMR (500 MHz) and  $^{13}\text{C}$  NMR (125 MHz) spectra of **3dk**

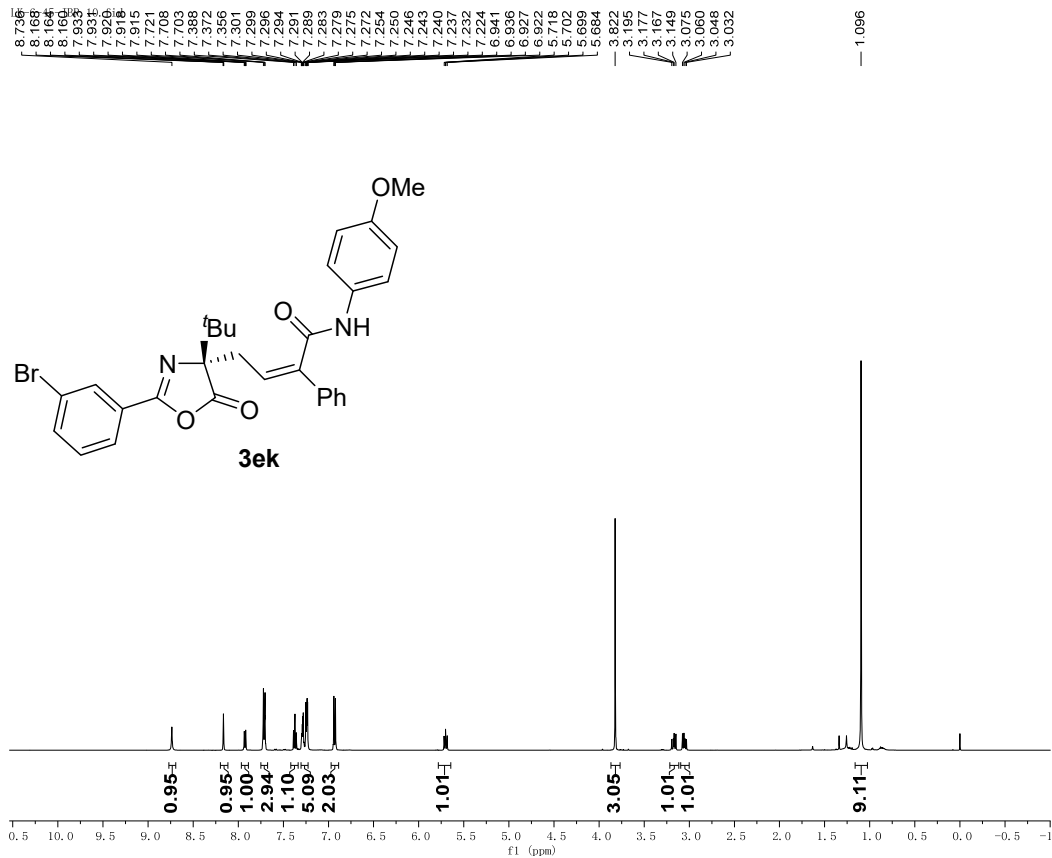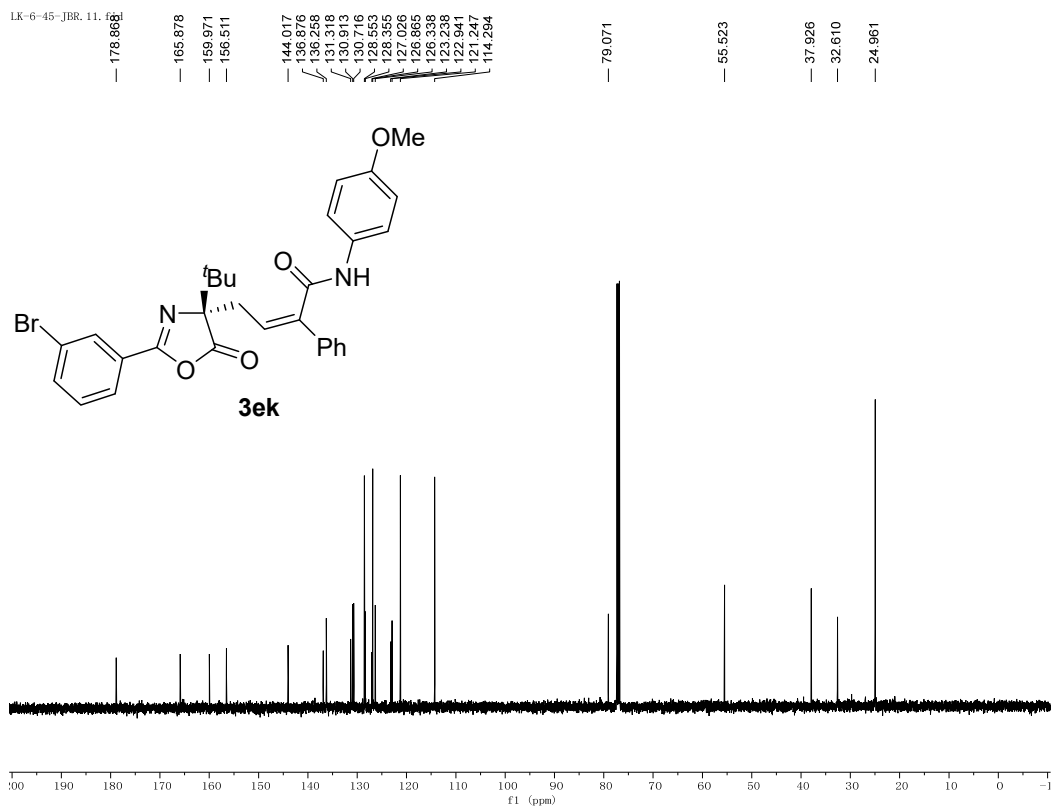

<sup>1</sup>H NMR (500 MHz) and <sup>13</sup>C NMR (125 MHz) spectra of **3ek**



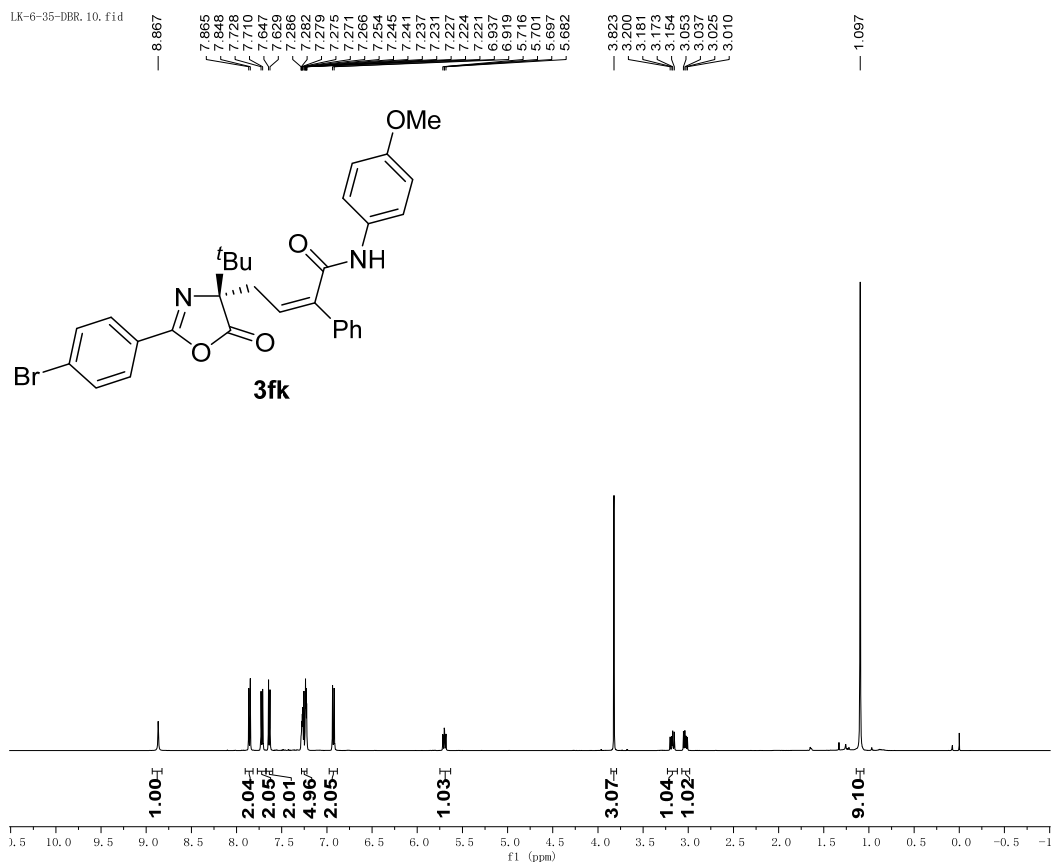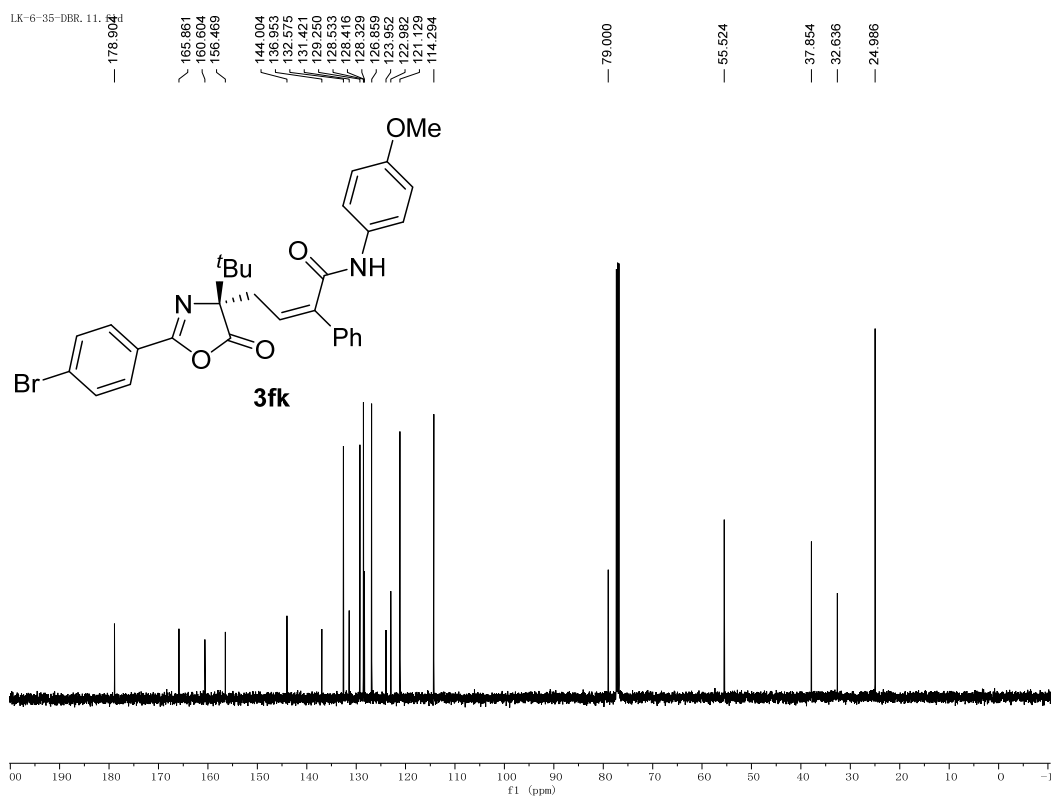

<sup>1</sup>H NMR (500 MHz) and <sup>13</sup>C NMR (125 MHz) spectra of **3fk**

LK-6-49-JME.10.fid

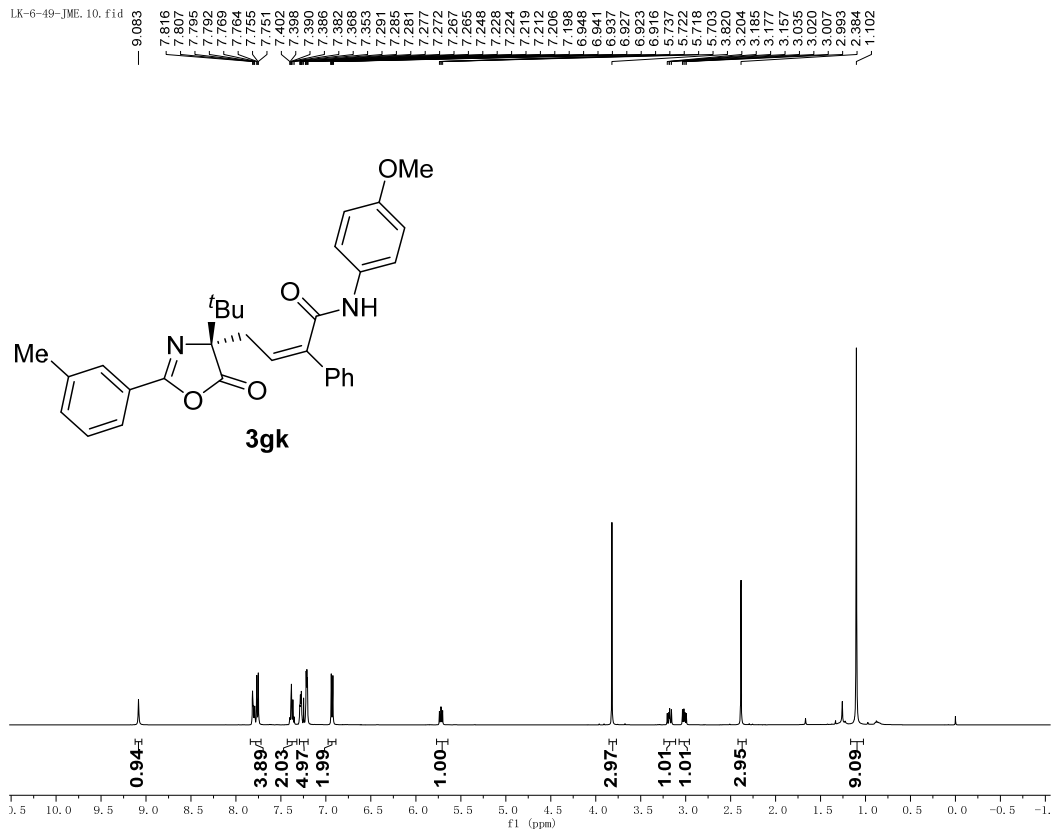

LK-6-49-JME.11.2.d

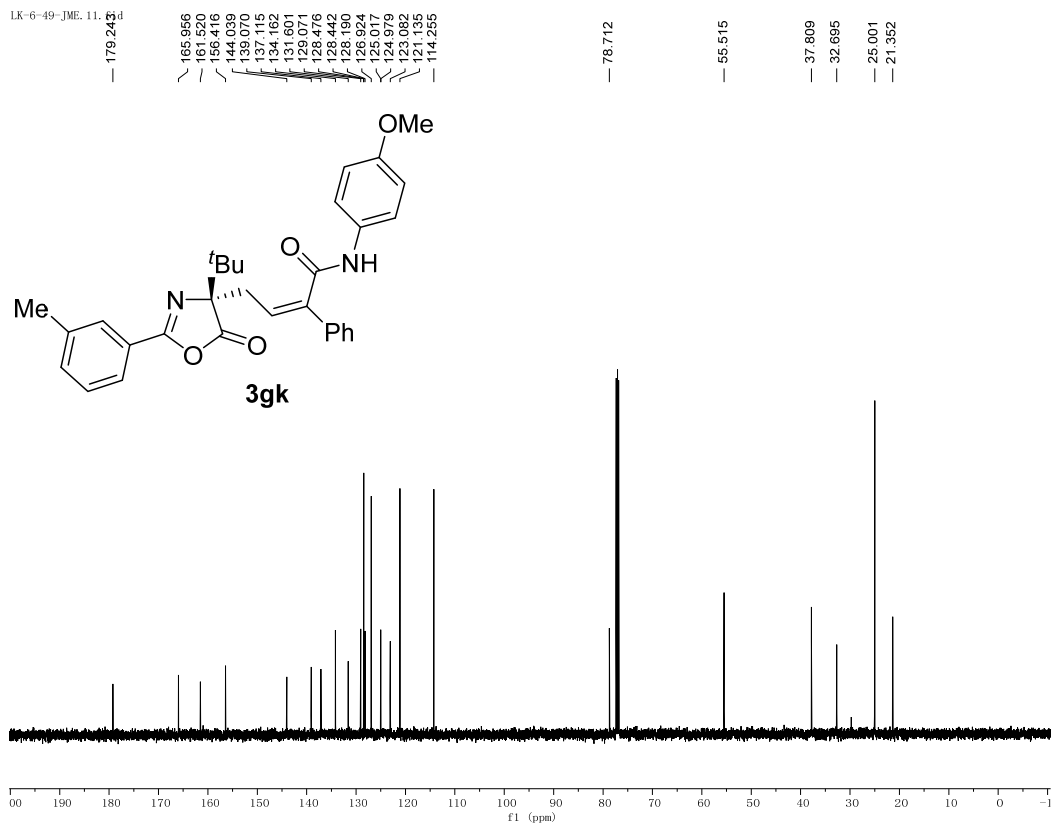

<sup>1</sup>H NMR (500 MHz) and <sup>13</sup>C NMR (125 MHz) spectra of **3gk**

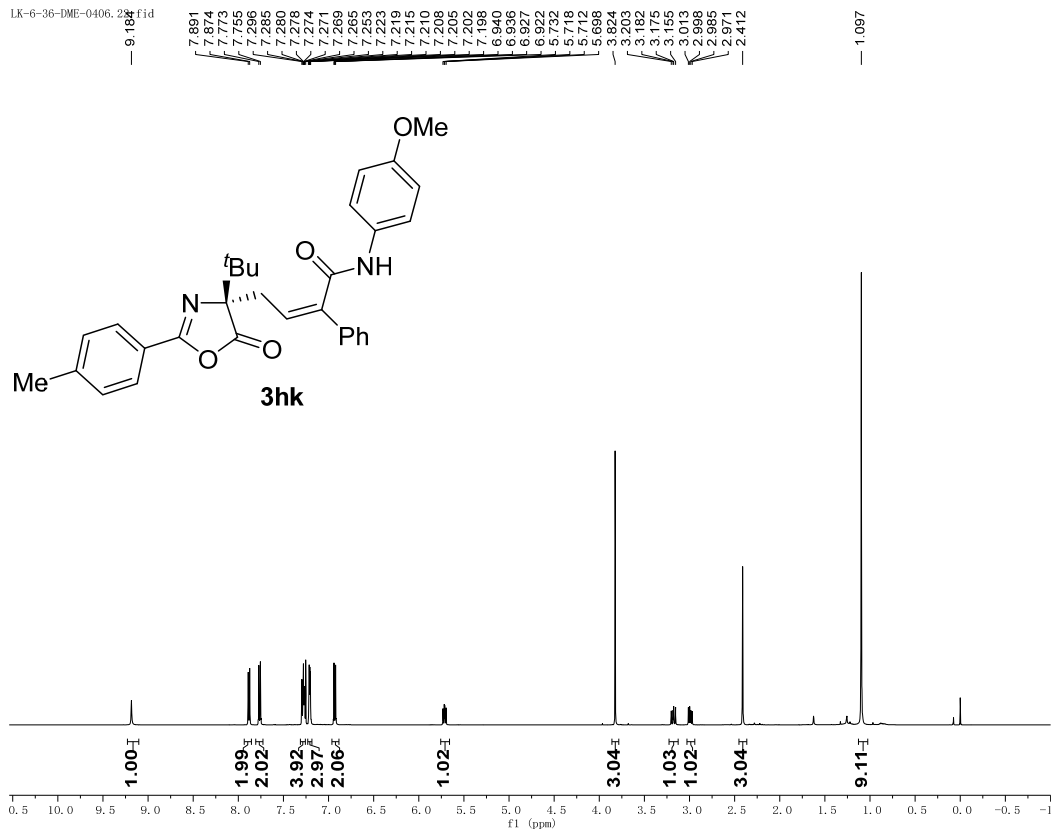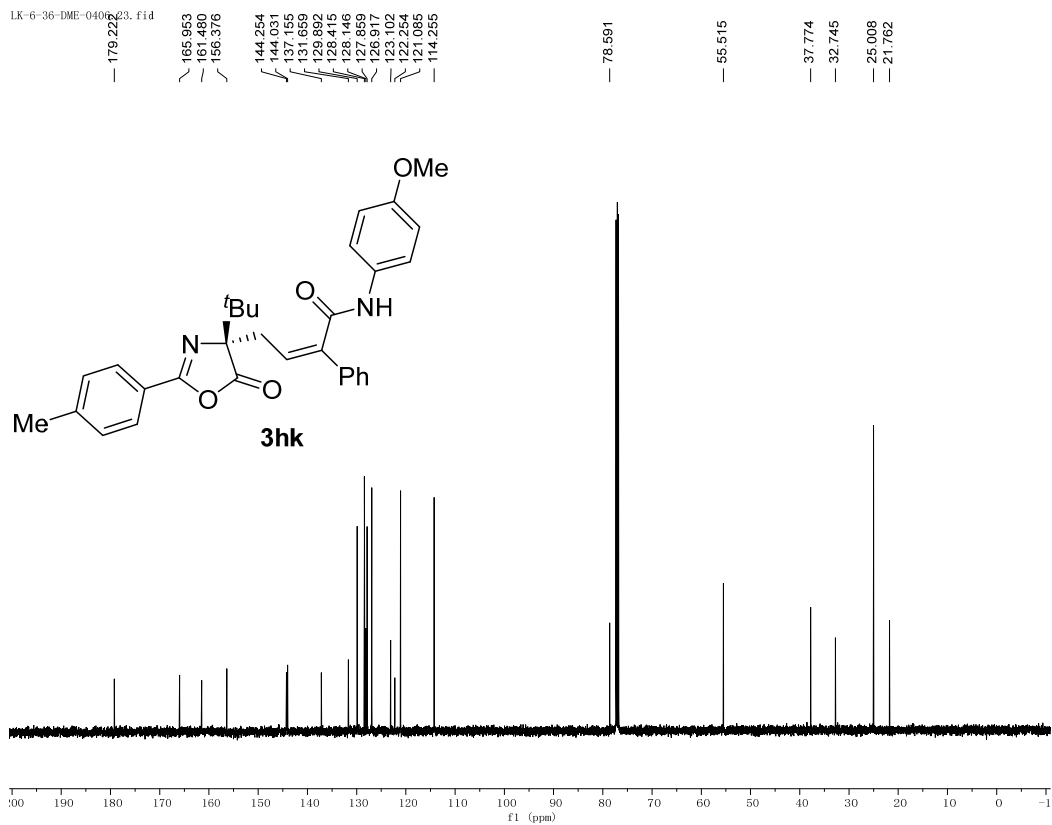

<sup>1</sup>H NMR (500 MHz) and <sup>13</sup>C NMR (125 MHz) spectra of **3hk**

LK-6-37-DET.10.f1

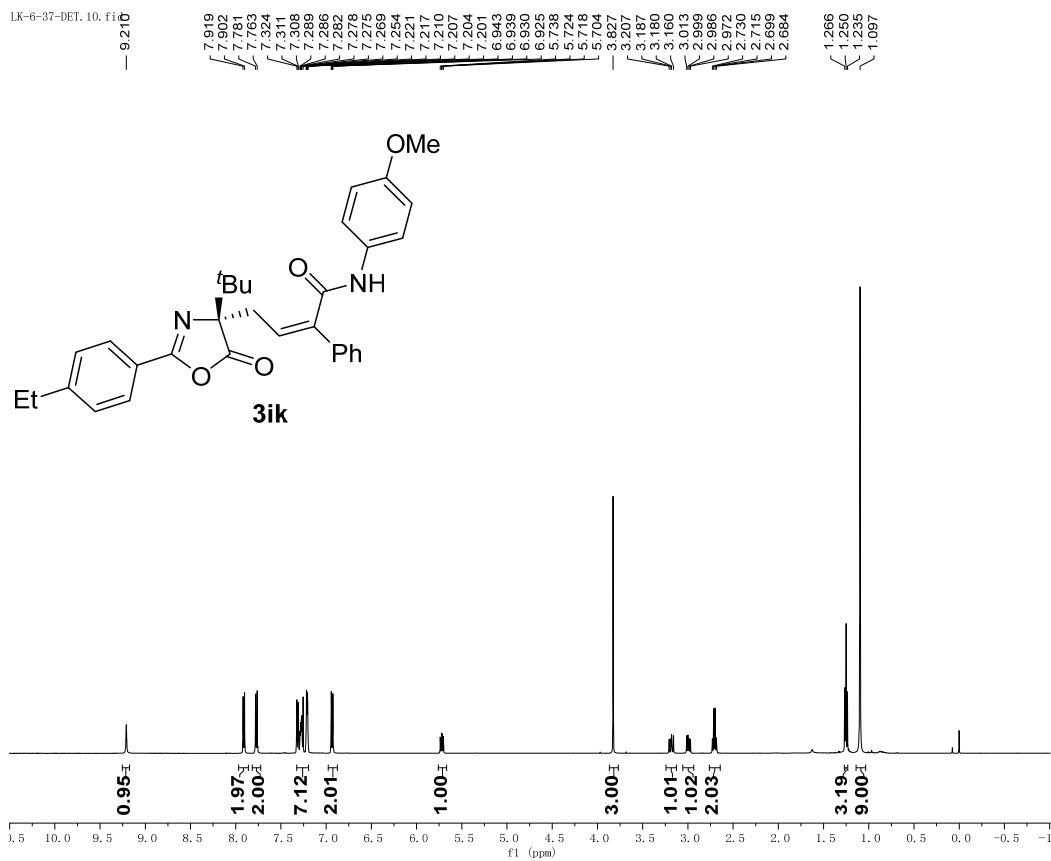

LK-6-37-DET.11.f1

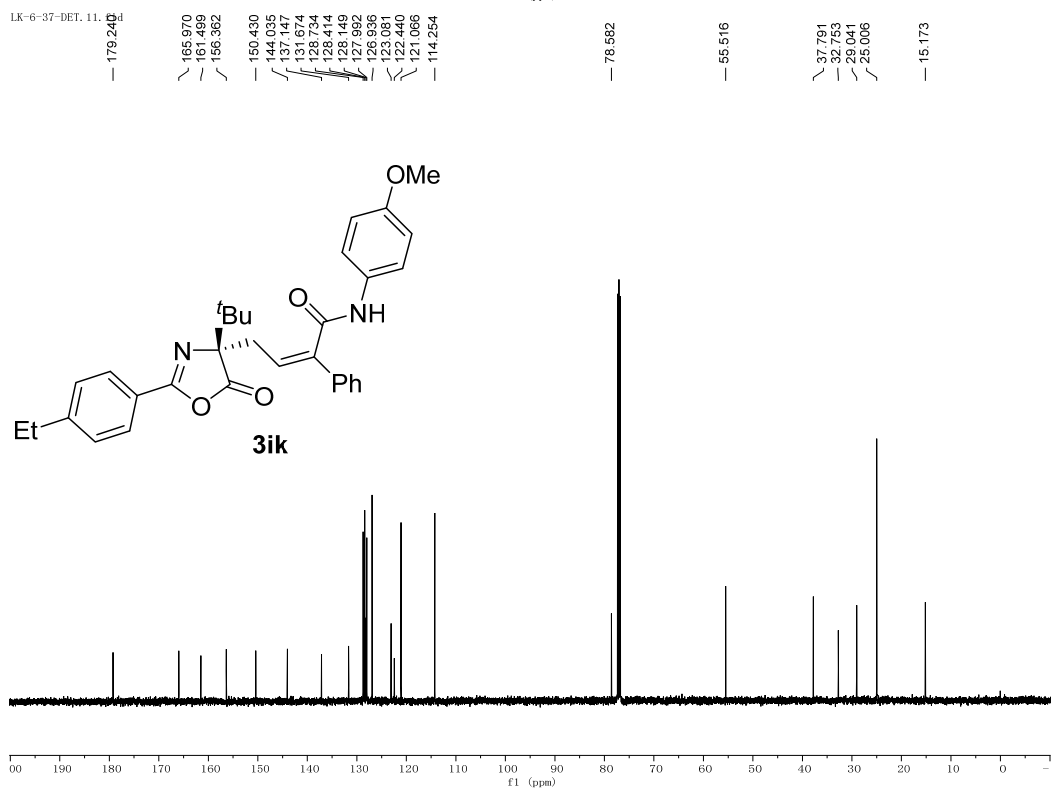

<sup>1</sup>H NMR (500 MHz) and <sup>13</sup>C NMR (125 MHz) spectra of **3ik**

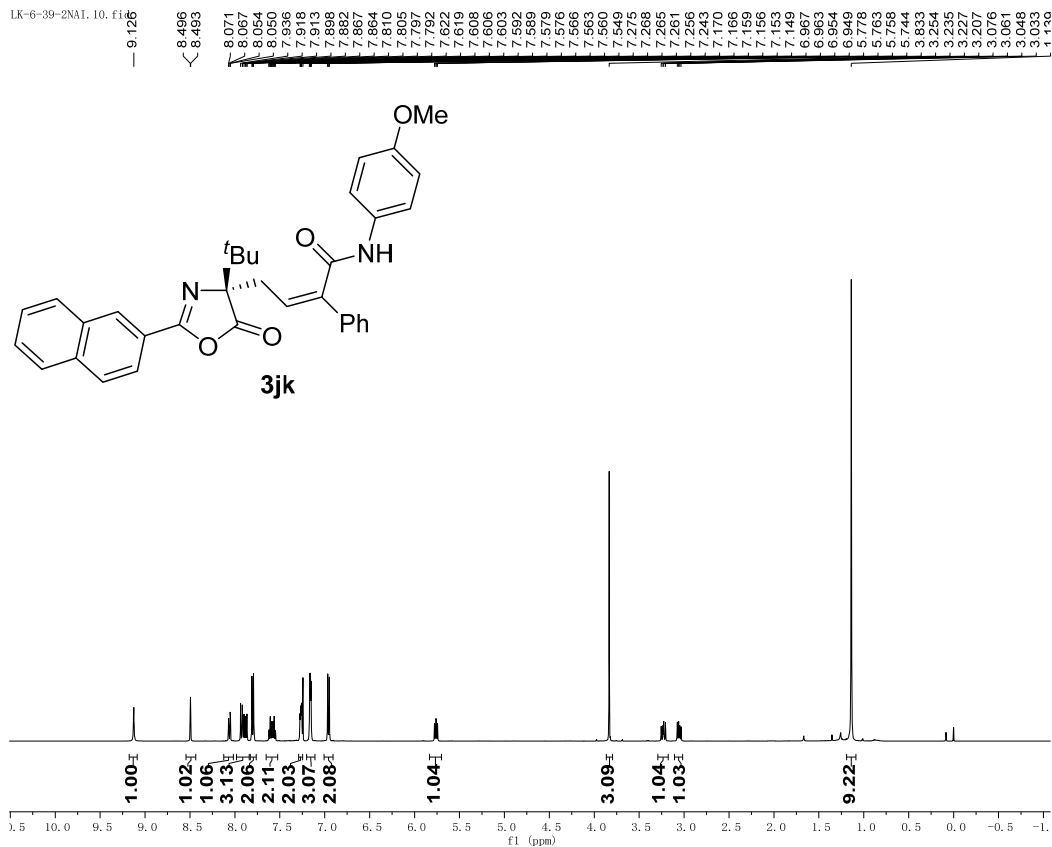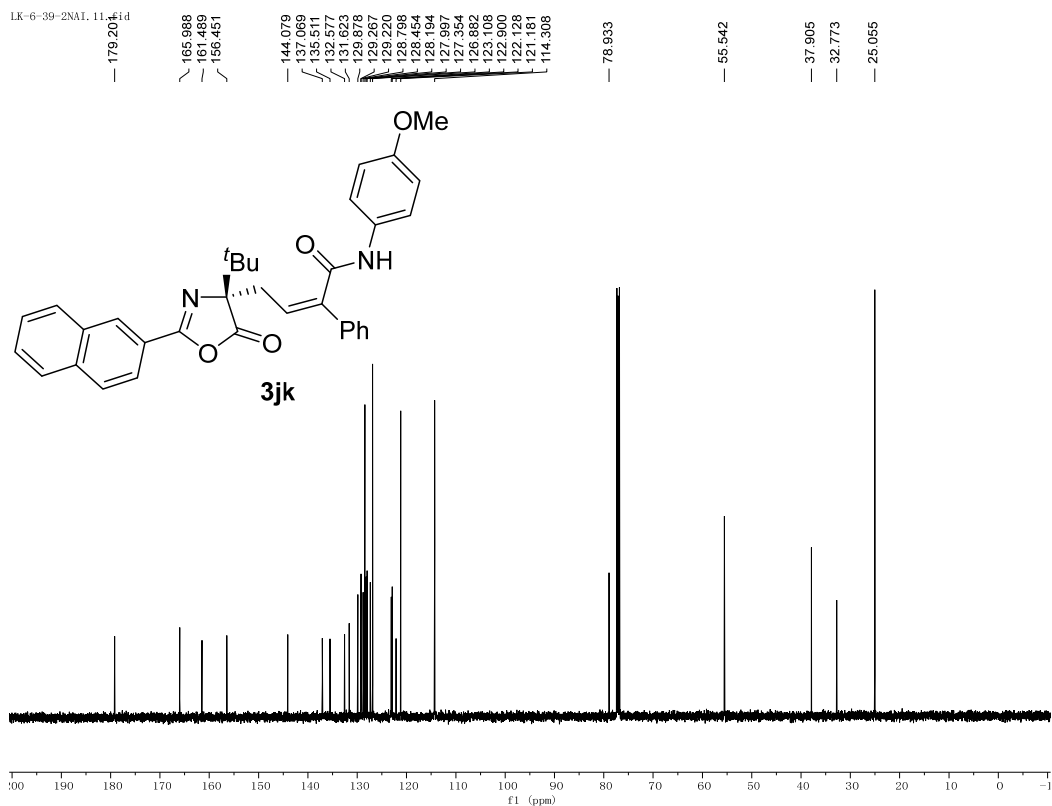

<sup>1</sup>H NMR (500 MHz) and <sup>13</sup>C NMR (125 MHz) spectra of **3jk**

LK-6-40-2FN, 10. f

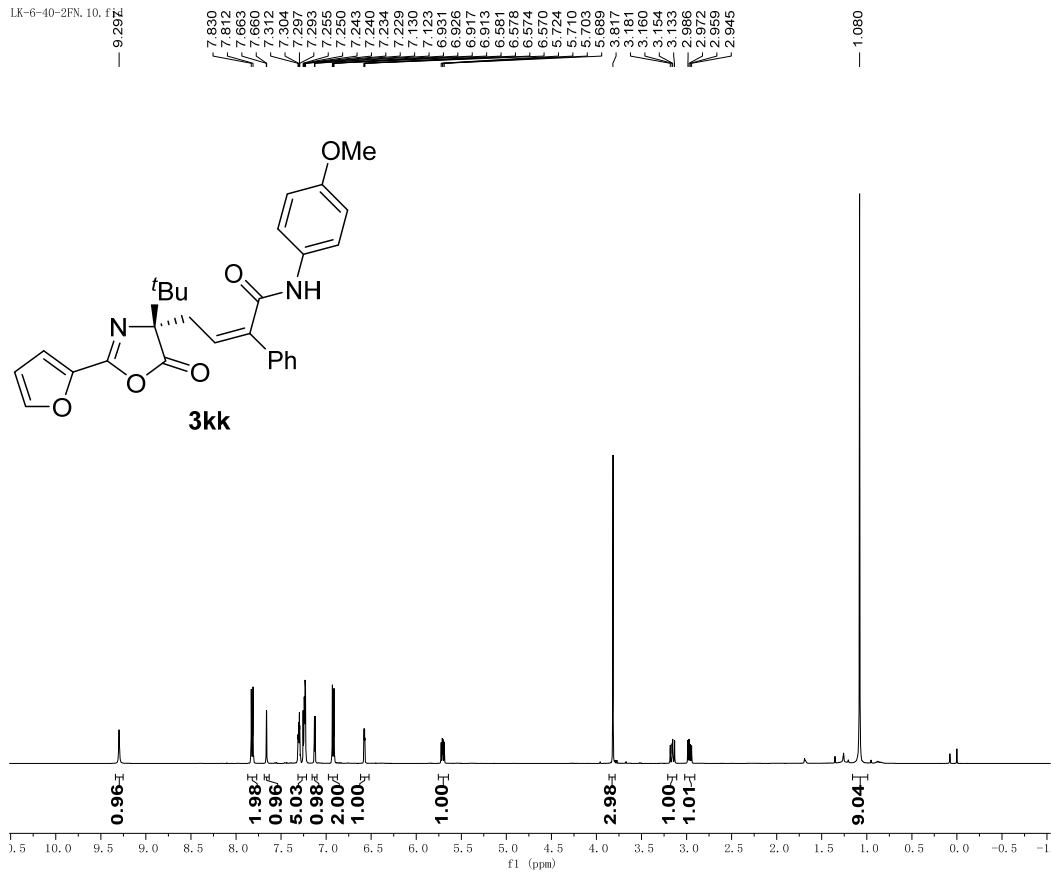

LK-6-40-2FN, 11. f

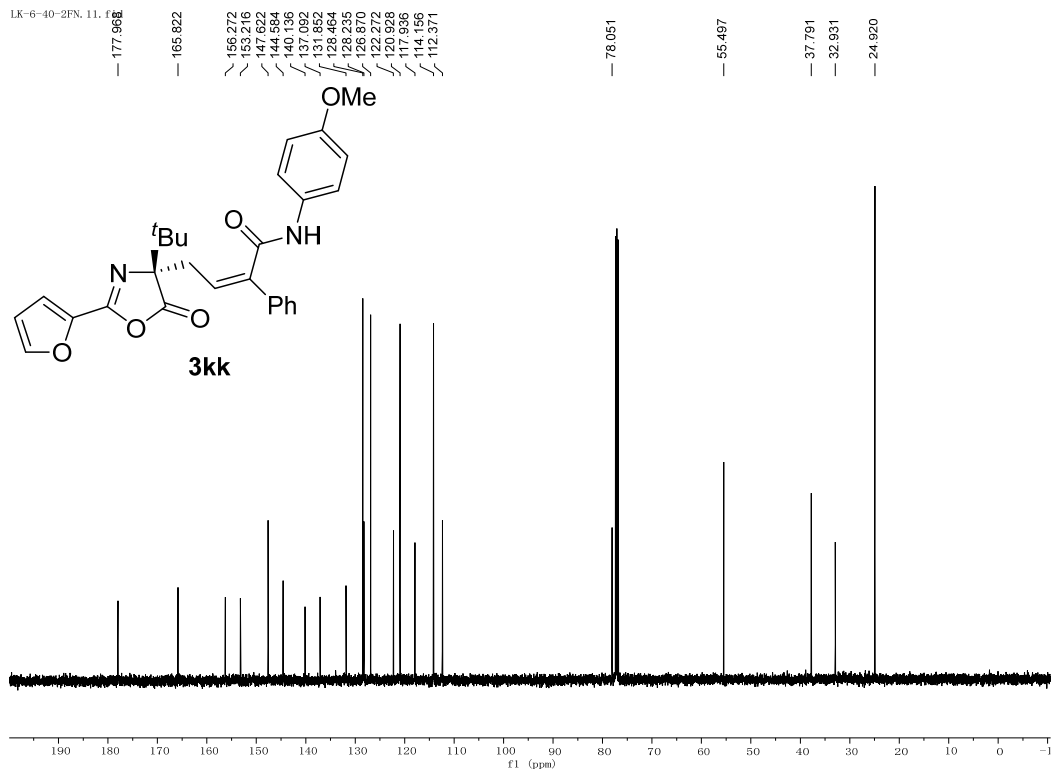

<sup>1</sup>H NMR (500 MHz) and <sup>13</sup>C NMR (125 MHz) spectra of **3kk**

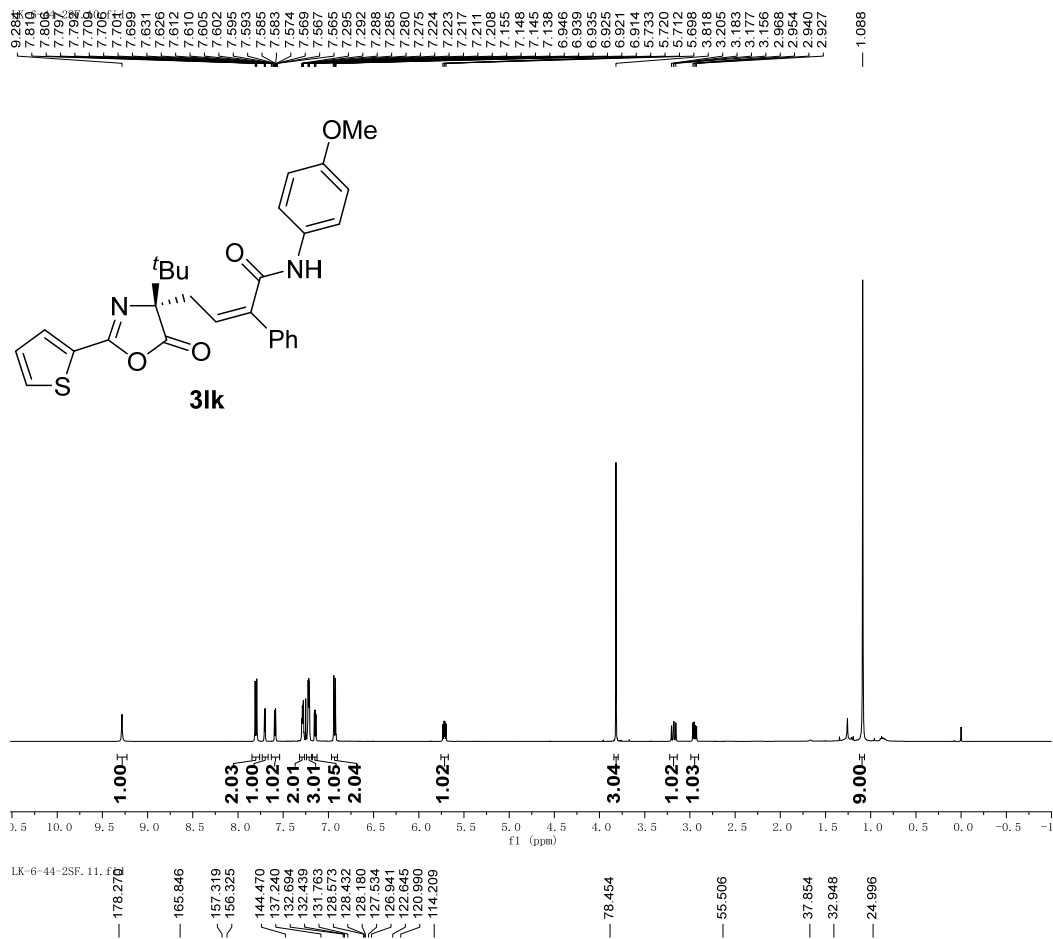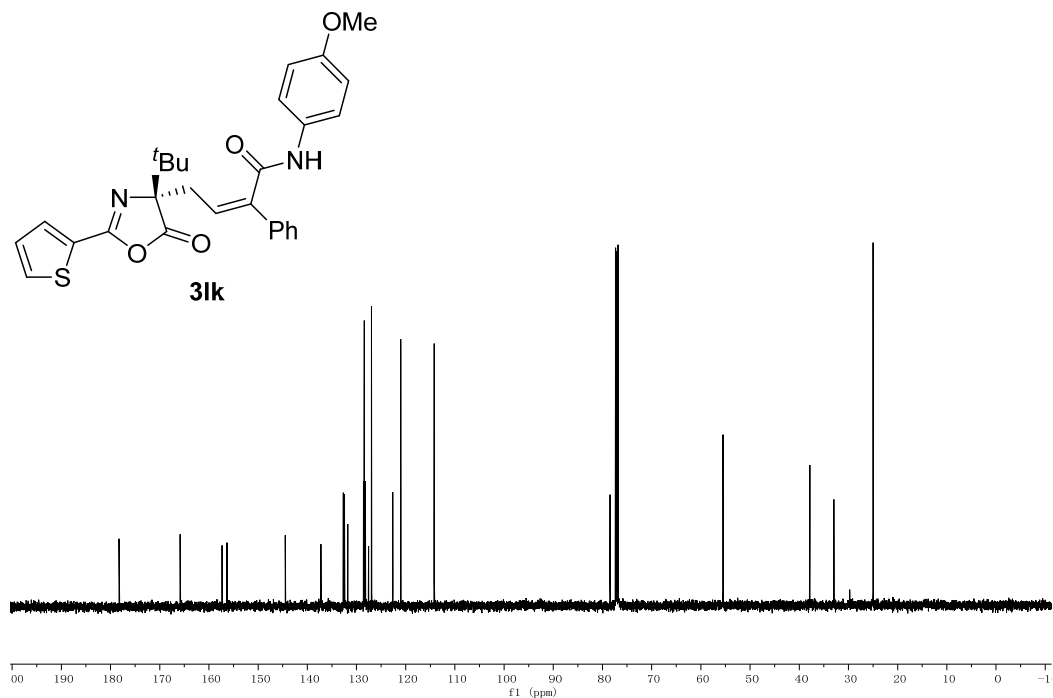

<sup>1</sup>H NMR (500 MHz) and <sup>13</sup>C NMR (125 MHz) spectra of **3lk**

8.764  
8.005  
8.004  
7.994  
7.987  
7.703  
7.696  
7.691  
7.682  
7.675  
7.671  
7.606  
7.598  
7.594  
7.590  
7.582  
7.579  
7.576  
7.565  
7.502  
7.492  
7.489  
7.478  
7.474  
7.334  
7.332  
7.330  
7.328  
7.325  
7.318  
7.314  
7.263  
7.259  
7.255  
7.252  
7.245  
7.241  
7.237  
7.235  
6.935  
6.928  
6.924  
6.914  
6.910  
6.903  
5.854  
5.839  
5.836  
3.871  
3.818  
3.158  
3.139  
3.130  
3.111  
2.978  
2.963  
2.950  
2.935  
2.876  
2.854  
2.041  
2.039  
2.026  
2.024  
2.011  
2.010  
1.946  
1.931  
0.916

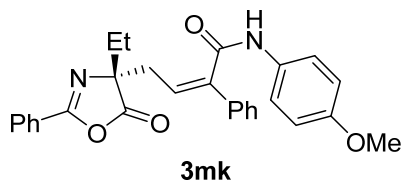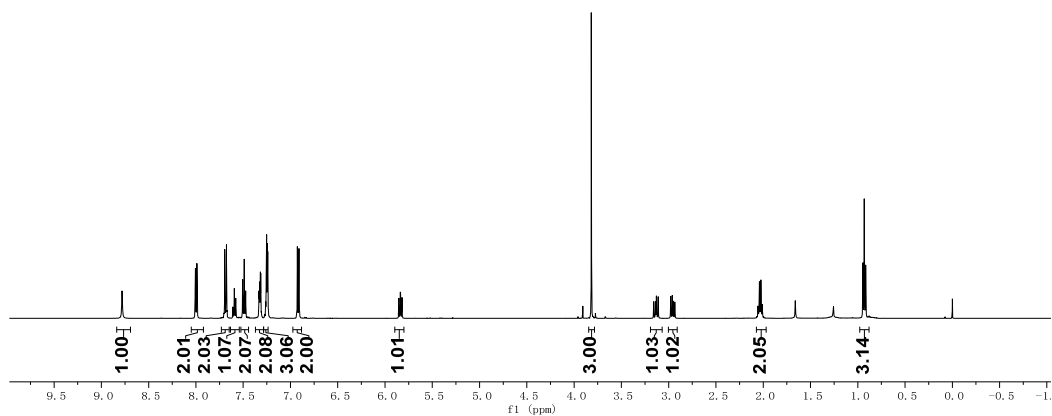

LK-6-61-ET. 11.

179.717  
165.858  
161.502  
156.538  
143.642  
133.365  
133.355  
131.388  
129.115  
128.559  
128.347  
127.985  
126.964  
125.129  
123.289  
121.296  
114.317  
74.026  
55.550  
37.296  
31.109  
8.195

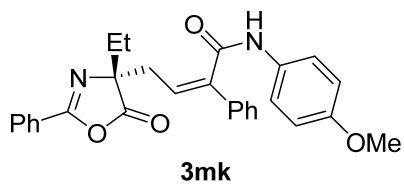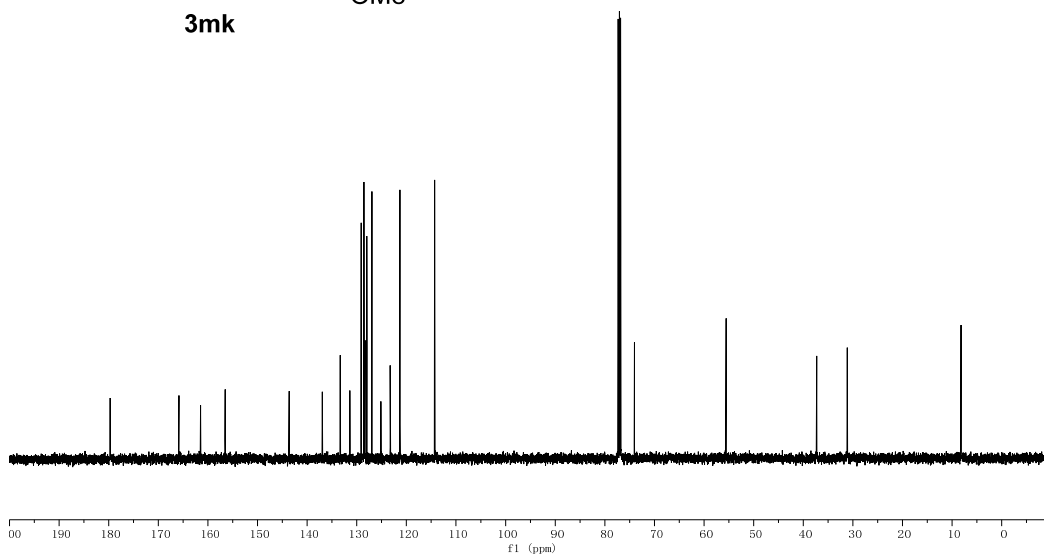

<sup>1</sup>H NMR (500 MHz) and <sup>13</sup>C NMR (125 MHz) spectra of **3mk**



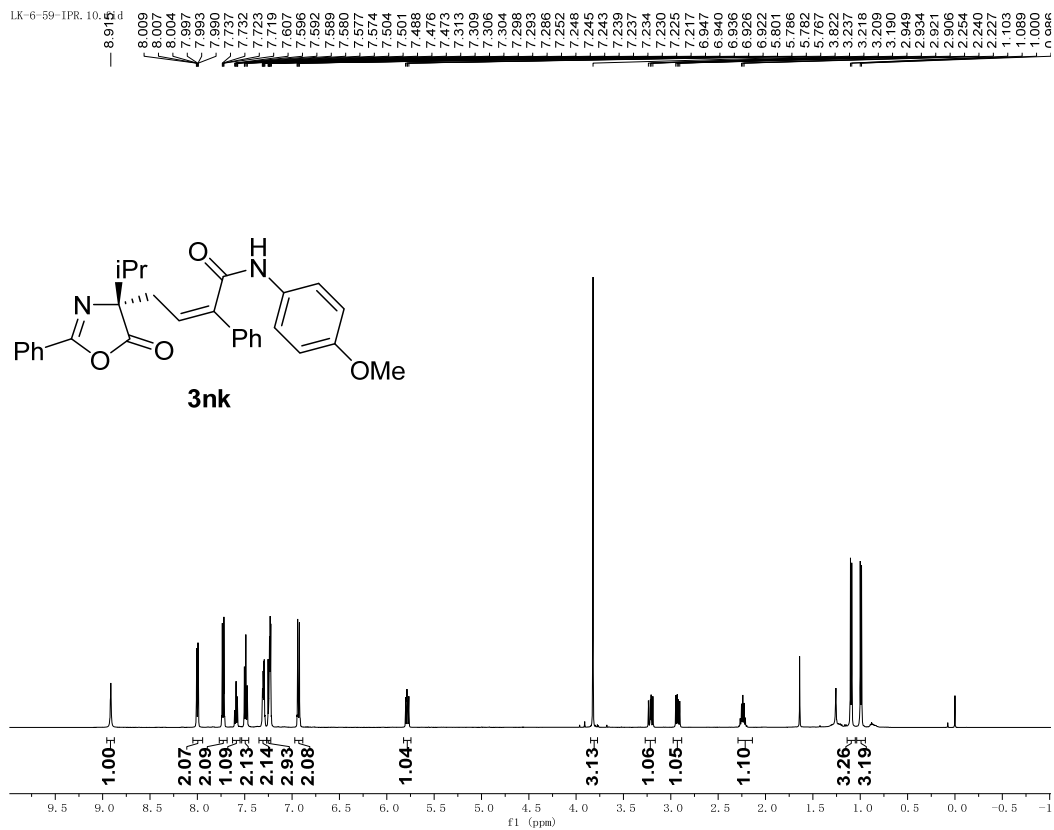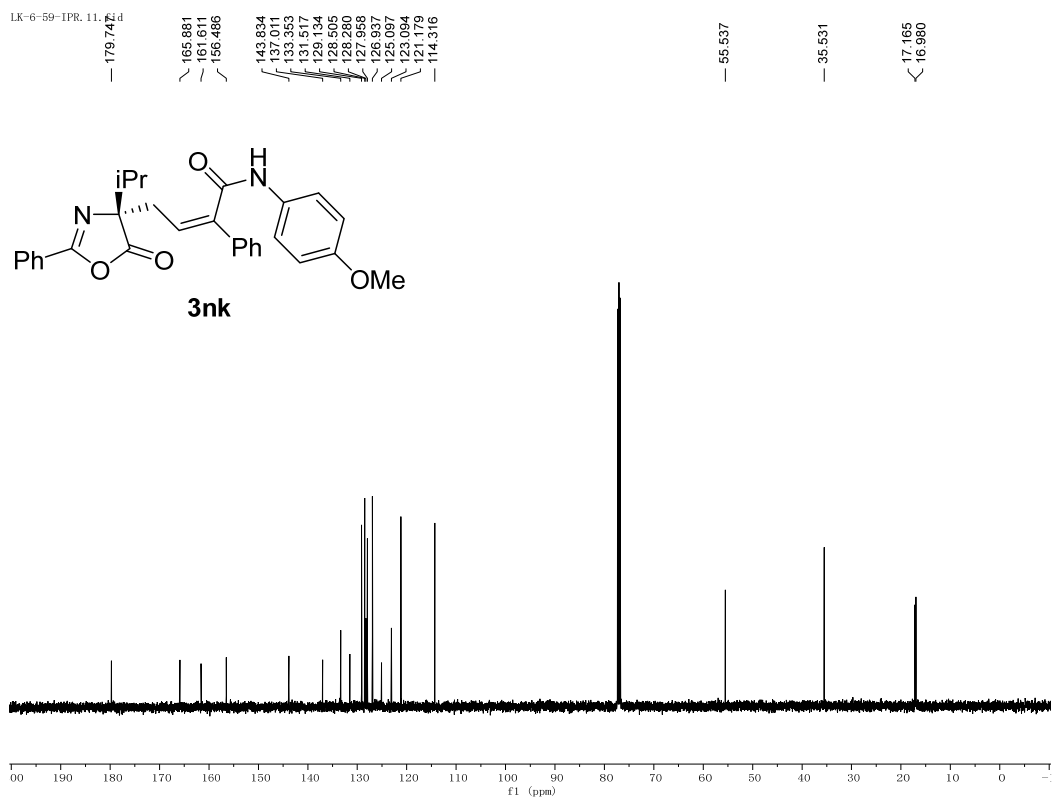

<sup>1</sup>H NMR (500 MHz) and <sup>13</sup>C NMR (125 MHz) spectra of **3nk**

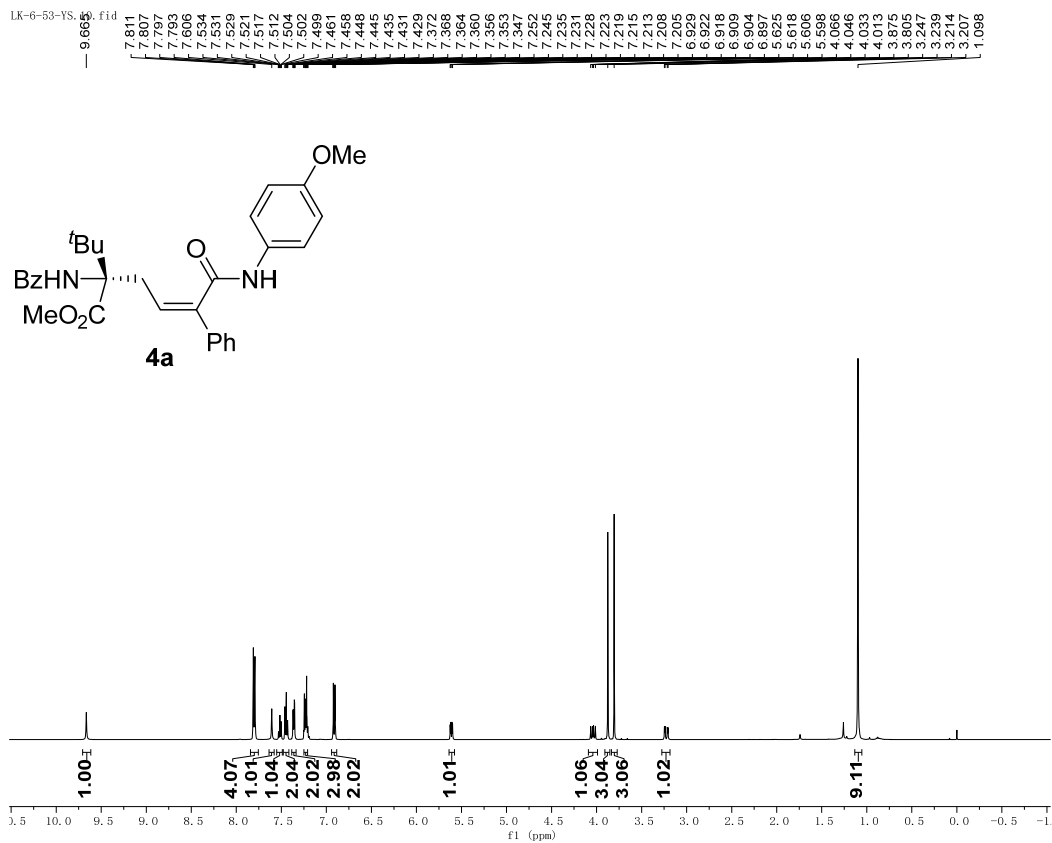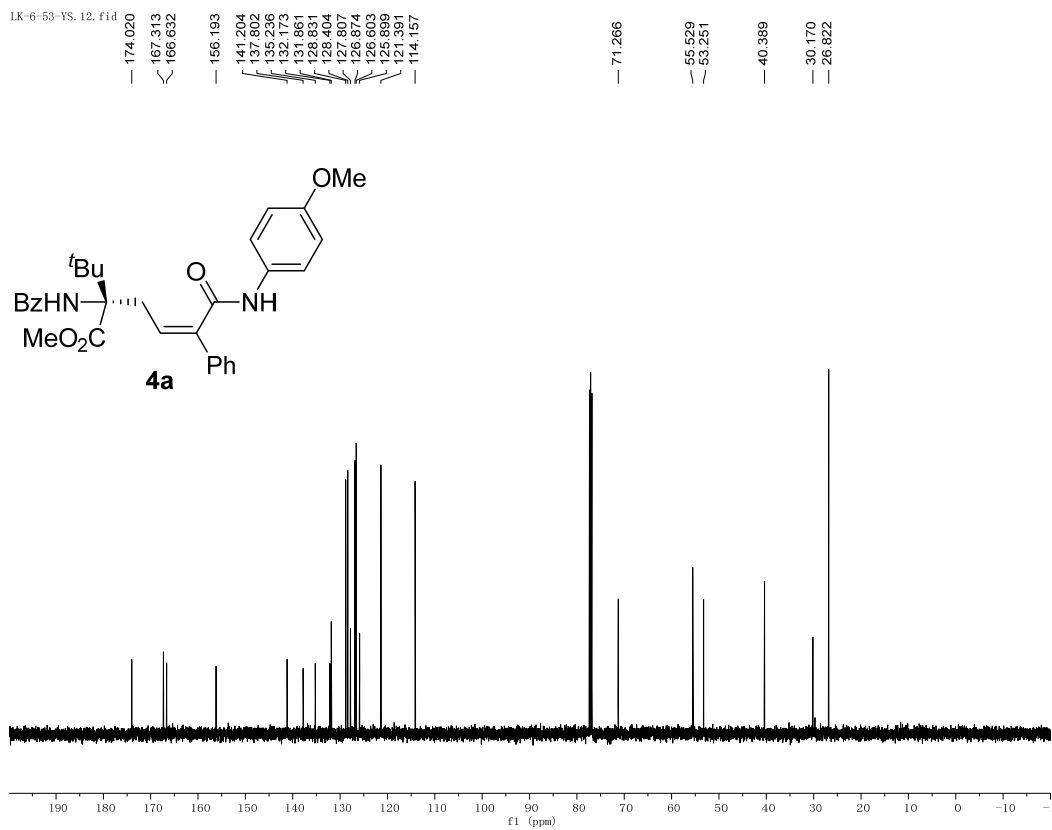

**<sup>1</sup>H NMR (500 MHz) and <sup>13</sup>C NMR (125 MHz) spectra of 4a**

LK-6-58-NABH4.10.fid

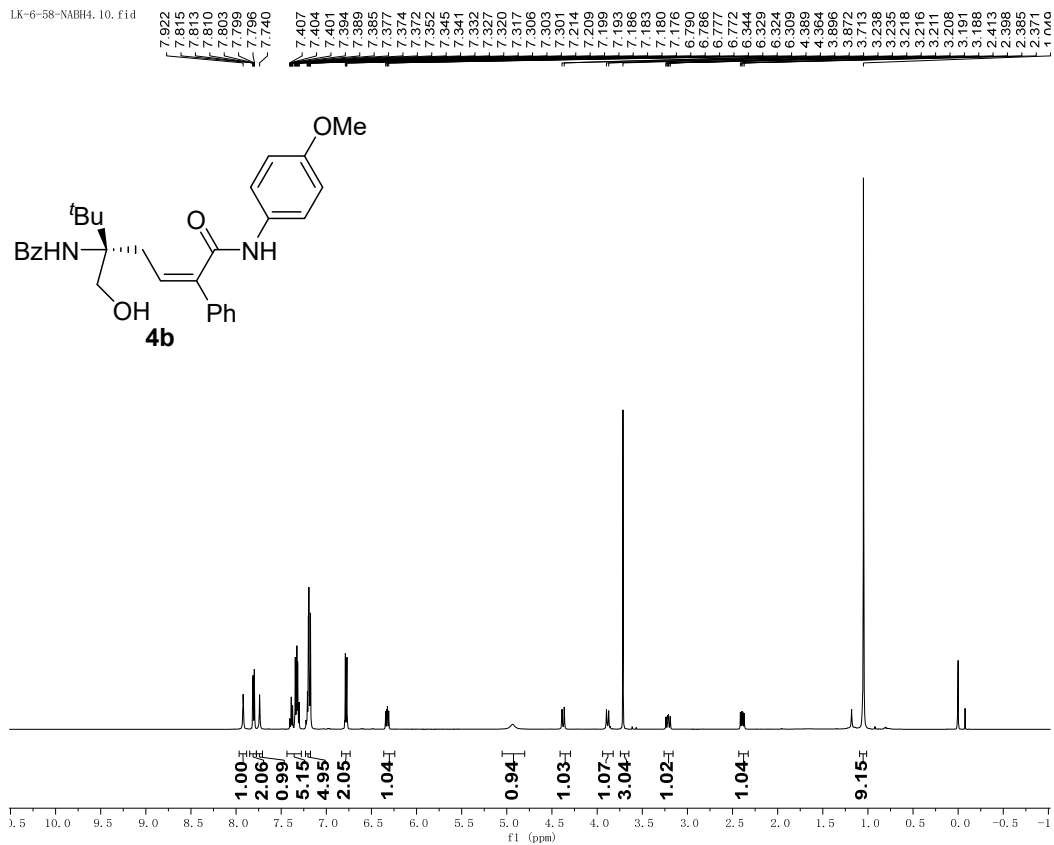

LK-6-58-NABH4.11.fid

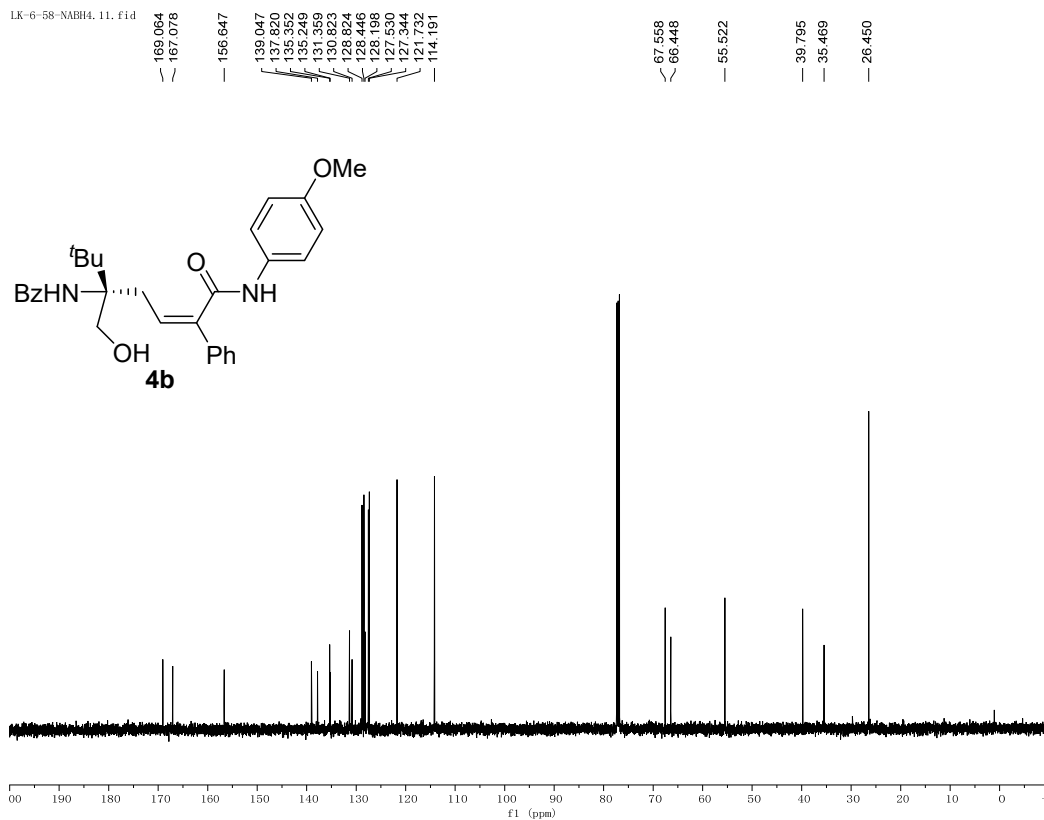

<sup>1</sup>H NMR (500 MHz) and <sup>13</sup>C NMR (125 MHz) spectra of **4b**

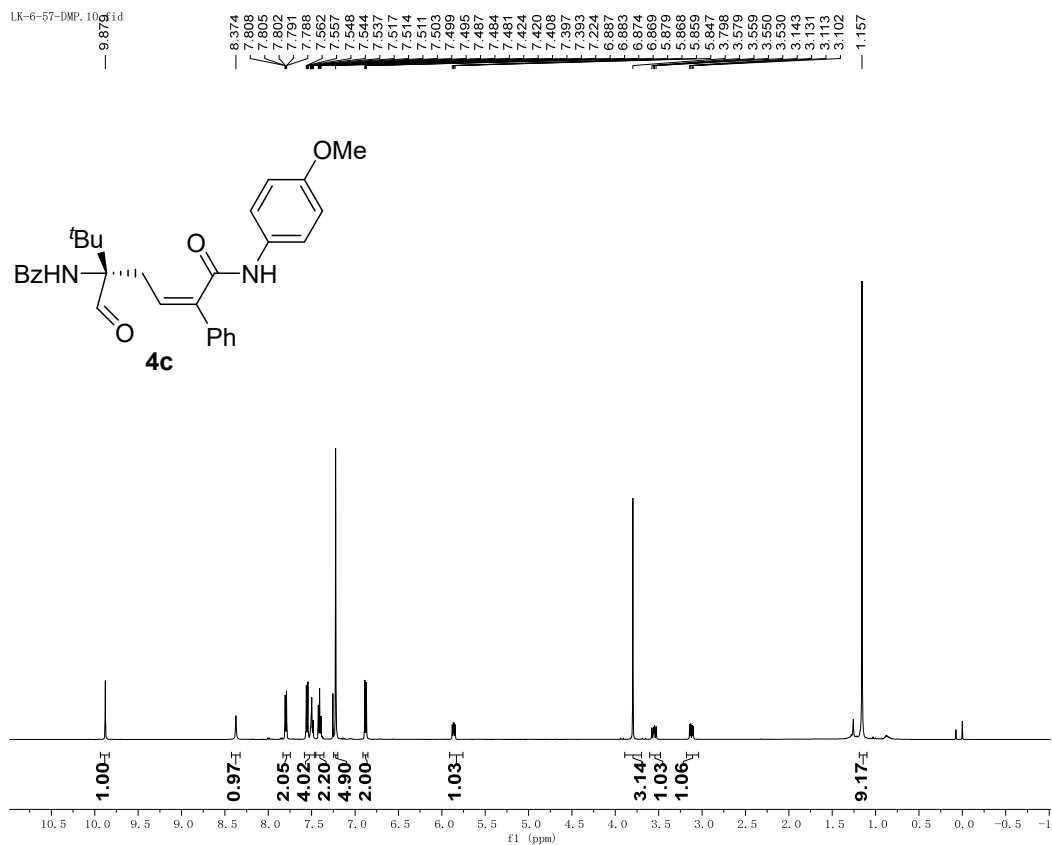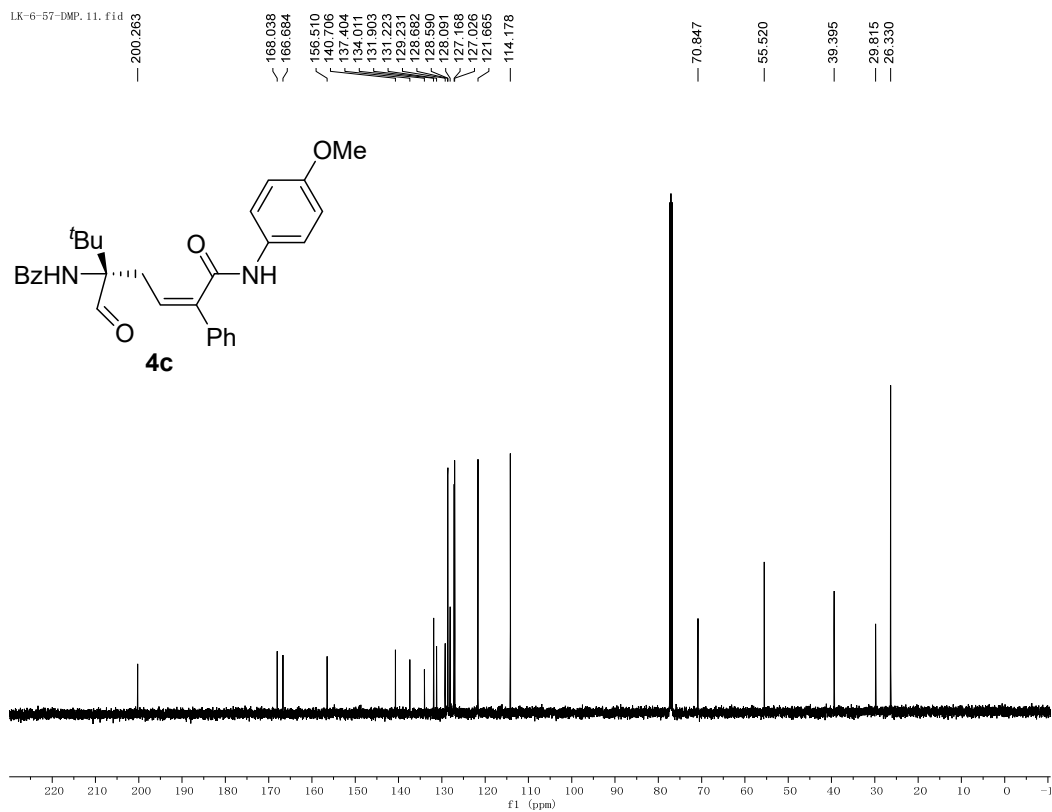

<sup>1</sup>H NMR (500 MHz) and <sup>13</sup>C NMR (125 MHz) spectra of **4c**

## HPLC Chromatograms of All Products

### HPLC chromatogram of racemic 3aa

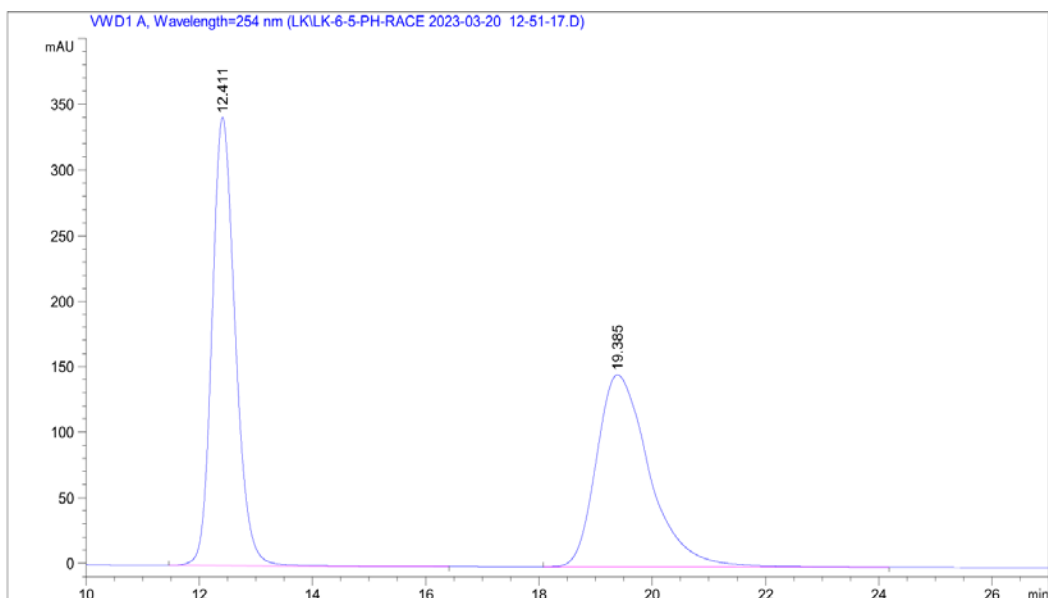

# [min] [min] [mAU\*s] [mAU] %

-----|-----|-----|-----|-----|-----|

1 12.411 BB 0.4397 9746.51172 341.81125 50.6016

2 19.385 BB 1.0161 9514.75391 146.23349 49.3984

### HPLC chromatogram of chiral 3aa

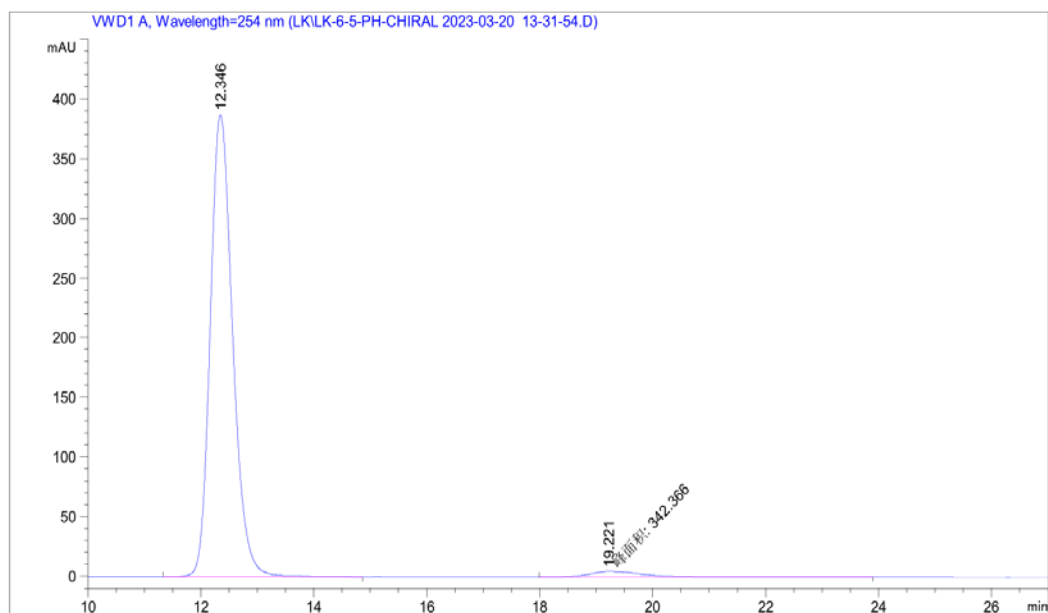

# [min] [min] [mAU\*s] [mAU] %

-----|-----|-----|-----|-----|-----|

1 12.346 BB 0.4247 1.06724e4 387.08429 96.8918

2 19.221 MM 1.1784 342.36591 4.84214 3.1082

### HPLC chromatogram of racemic 3ab

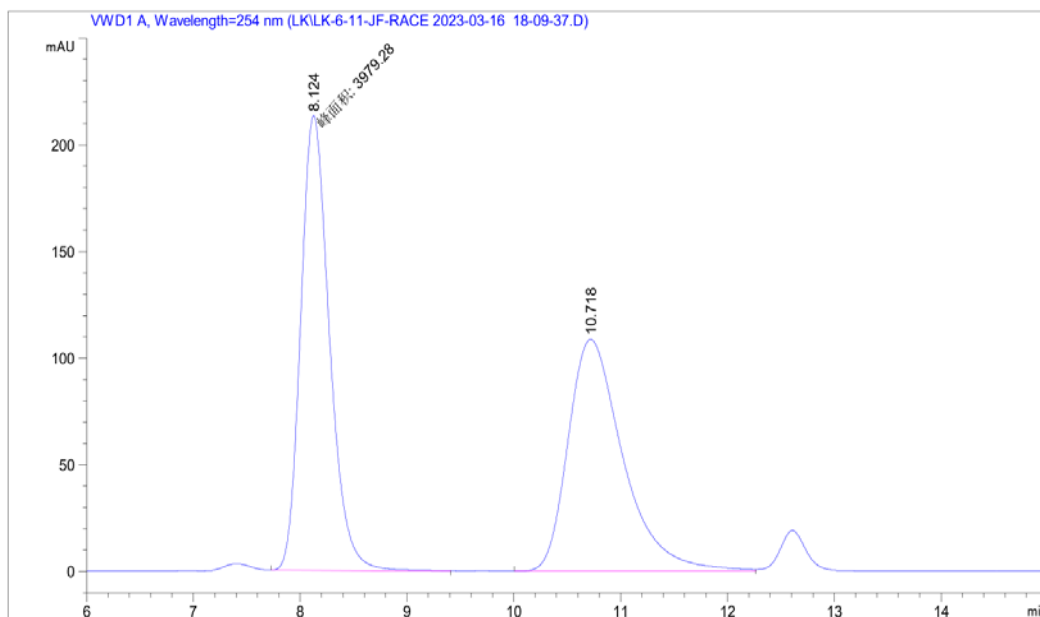

# [min] [min] [mAU\*s] [mAU] %

-----|-----|-----|-----|-----|-----|

1 8.124 MM 0.3111 3979.28247 213.18013 50.6601

2 10.718 BV 0.5413 3875.57886 108.60440 49.3399

### HPLC chromatogram of chiral 3ab

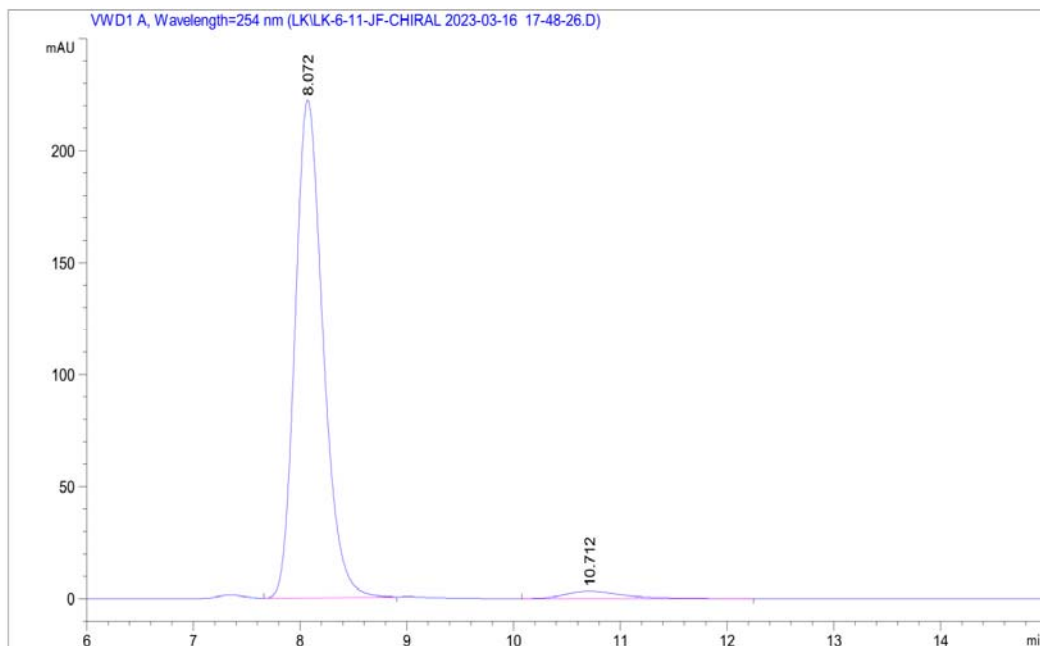

# [min] [min] [mAU\*s] [mAU] %

-----|-----|-----|-----|-----|-----|

1 8.072 BB 0.2799 4035.49023 222.22003 97.1276

2 10.712 BB 0.5406 119.34270 3.31068 2.8724

### HPLC chromatogram of racemic 3ac

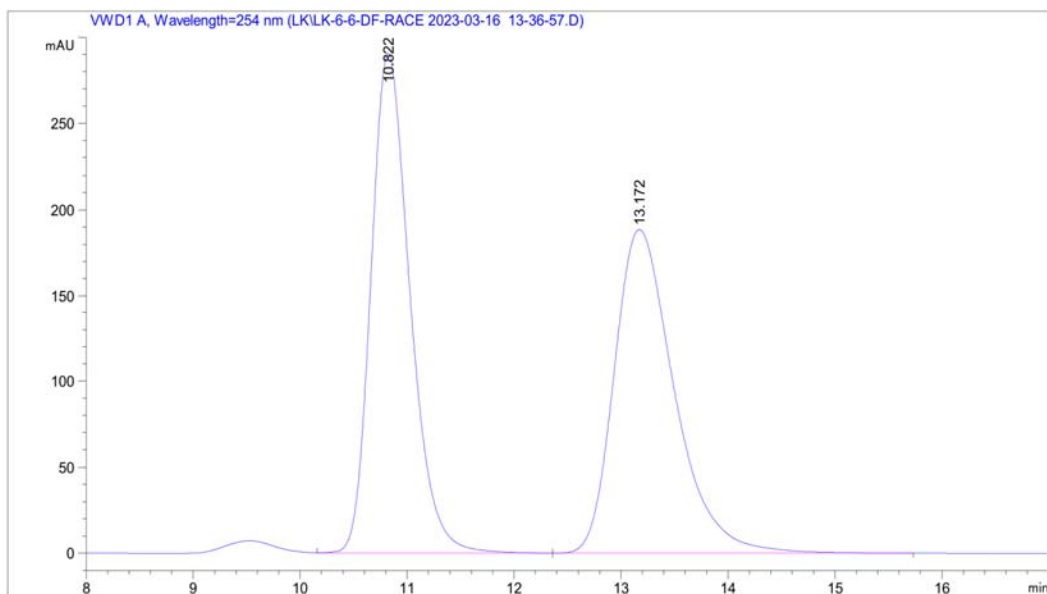

| # | [min]  | [min] | [mAU*s] | [mAU]      | %         |         |
|---|--------|-------|---------|------------|-----------|---------|
| 1 | 10.822 | VB    | 0.3895  | 7363.75391 | 290.68613 | 50.0828 |
| 2 | 13.172 | BB    | 0.5941  | 7339.40381 | 188.54808 | 49.9172 |

### HPLC chromatogram of chiral 3ac

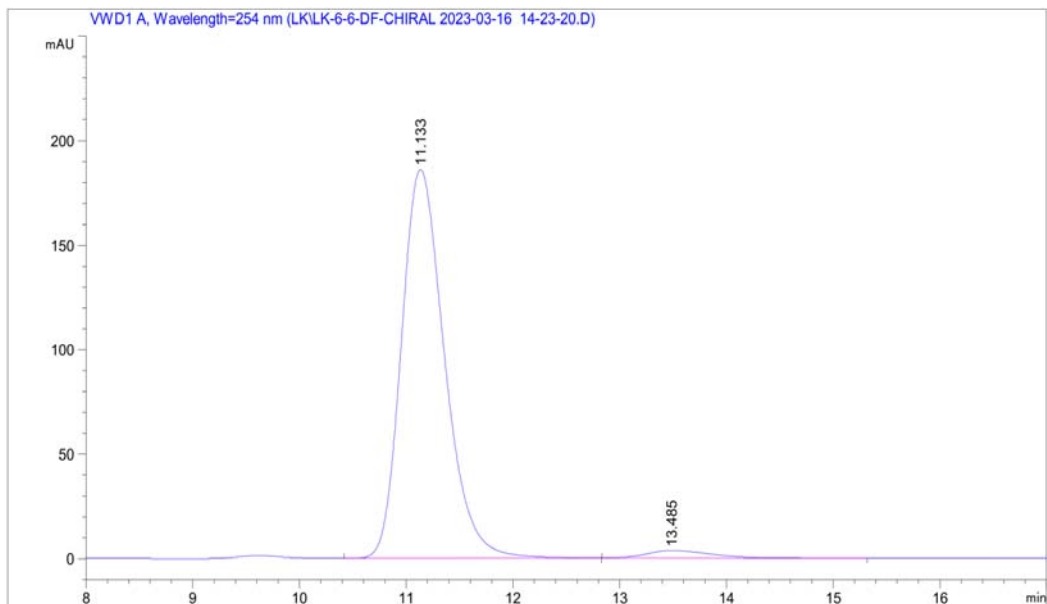

| # | [min]  | [min] | [mAU*s] | [mAU]      | %         |         |
|---|--------|-------|---------|------------|-----------|---------|
| 1 | 11.133 | BB    | 0.4329  | 5213.42139 | 186.03273 | 97.3326 |
| 2 | 13.485 | BB    | 0.6005  | 142.87244  | 3.49845   | 2.6674  |

### HPLC chromatogram of racemic 3ad

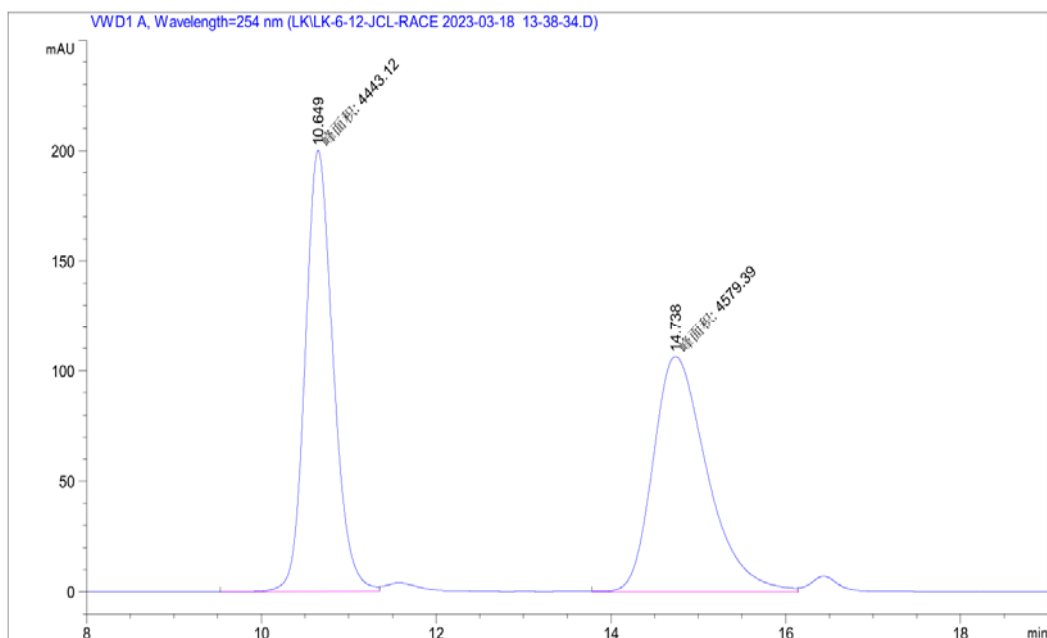

| # | [min]  | [min] | [mAU*s] | [mAU]      | %                 |
|---|--------|-------|---------|------------|-------------------|
| 1 | 10.649 | MM    | 0.3702  | 4443.11670 | 200.05740 49.2448 |
| 2 | 14.738 | MM    | 0.7169  | 4579.39209 | 106.46825 50.7552 |

### HPLC chromatogram of chiral 3ad

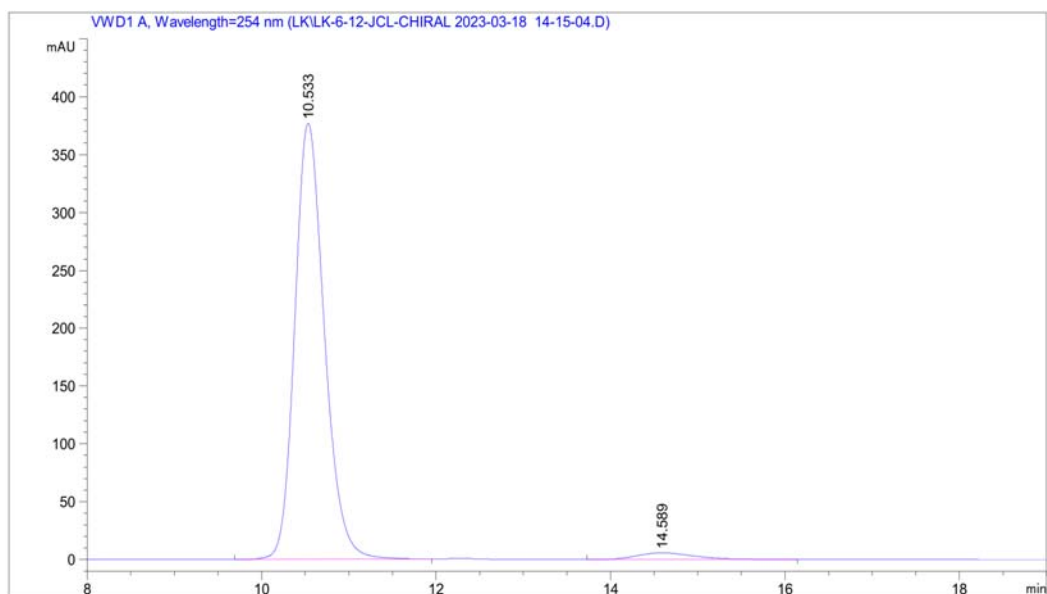

| # | [min]  | [min] | [mAU*s] | [mAU]      | %                 |
|---|--------|-------|---------|------------|-------------------|
| 1 | 10.533 | BB    | 0.3633  | 8889.61035 | 376.77554 97.2114 |
| 2 | 14.589 | BB    | 0.6829  | 255.00665  | 5.65725 2.7886    |



### HPLC chromatogram of racemic 3ae

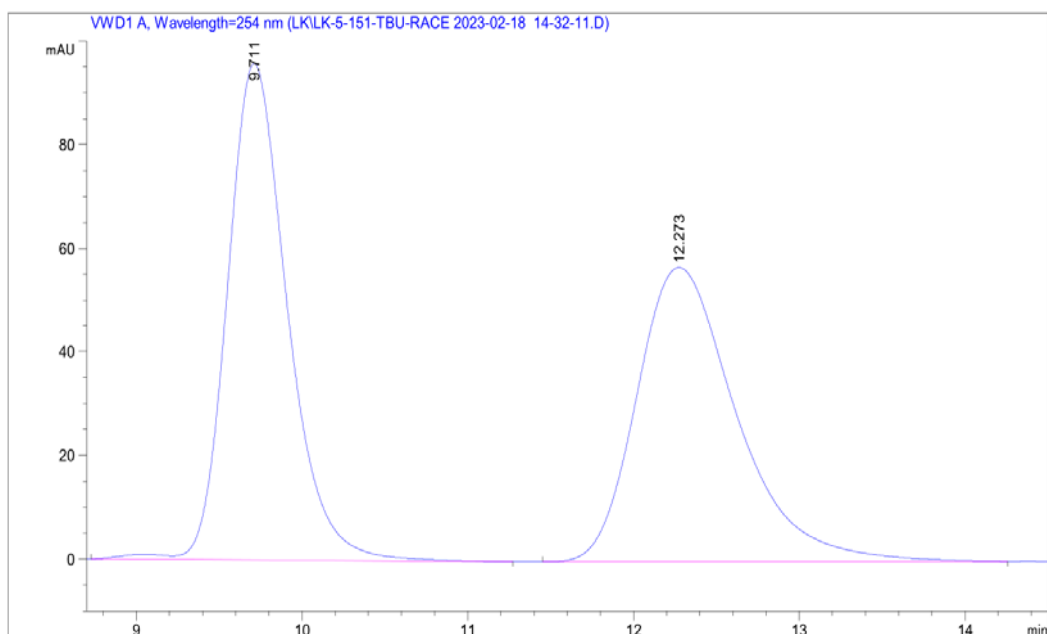

| # | [min]  | [min] | [mAU*s]             | [mAU]    | %       |
|---|--------|-------|---------------------|----------|---------|
| 1 | 9.711  | VB    | R 0.3845 2410.96289 | 95.82862 | 50.4034 |
| 2 | 12.273 | BB    | 0.6301 2372.37231   | 56.82626 | 49.5966 |

### HPLC chromatogram of chiral 3ae

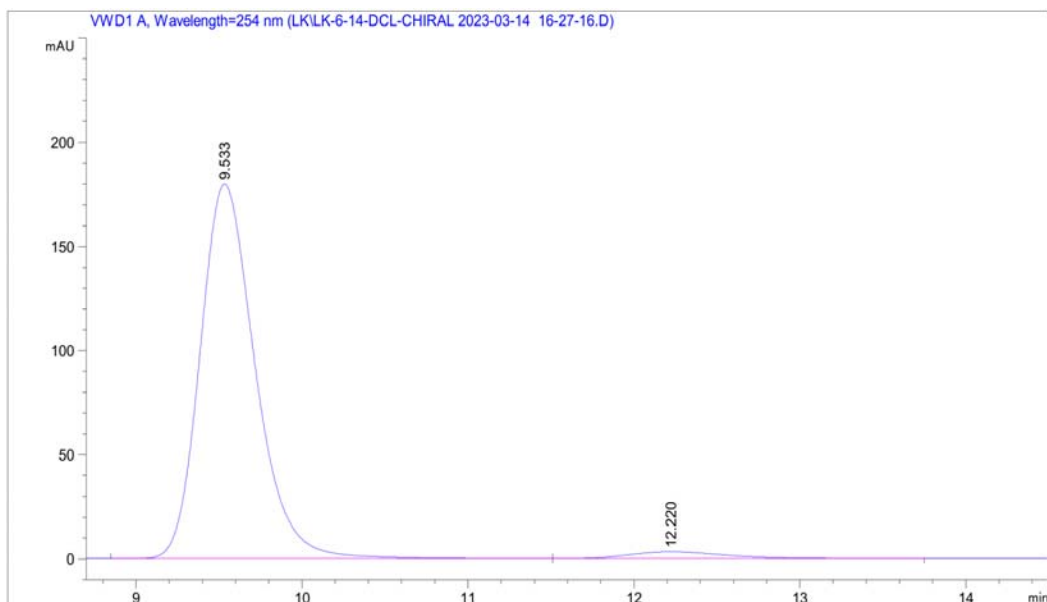

| # | [min]  | [min] | [mAU*s]           | [mAU]     | %       |
|---|--------|-------|-------------------|-----------|---------|
| 1 | 9.533  | BB    | 0.3534 4136.37500 | 179.76462 | 97.0808 |
| 2 | 12.220 | BB    | 0.5826 124.38047  | 3.14363   | 2.9192  |

### HPLC chromatogram of racemic 3af

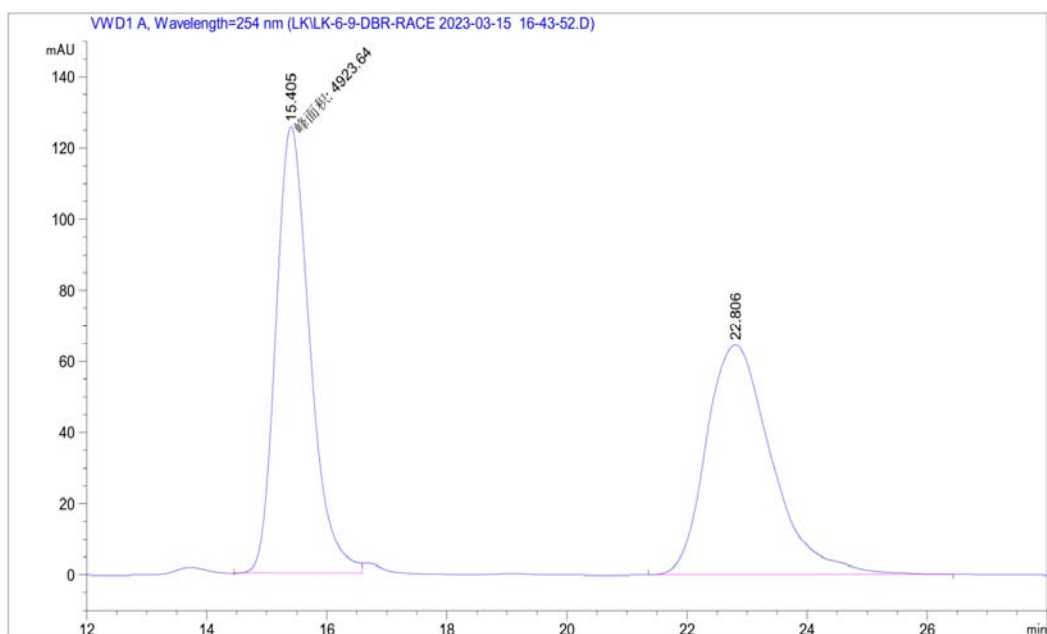

| # | [min]  | [min] | [mAU*s] | [mAU]      | %                 |
|---|--------|-------|---------|------------|-------------------|
| 1 | 15.405 | MM    | 0.6535  | 4923.63916 | 125.57277 50.1582 |
| 2 | 22.806 | BB    | 1.1660  | 4892.58838 | 64.57186 49.8418  |

### HPLC chromatogram of chiral 3af

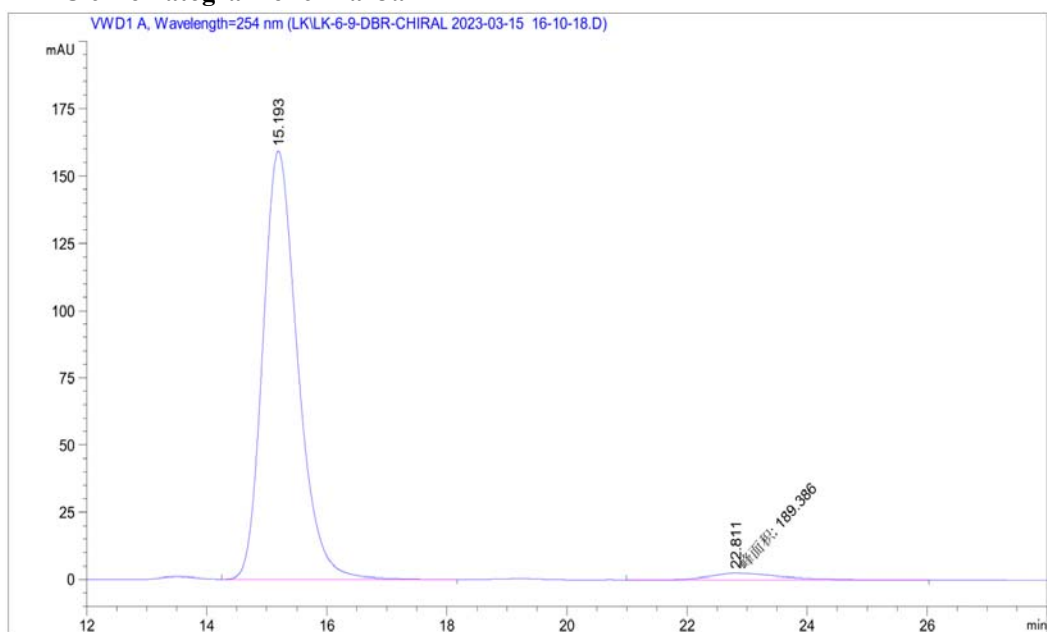

| # | [min]  | [min] | [mAU*s] | [mAU]      | %                 |
|---|--------|-------|---------|------------|-------------------|
| 1 | 15.193 | BB    | 0.6186  | 6391.42480 | 159.12971 97.1222 |
| 2 | 22.811 | MM    | 1.2965  | 189.38553  | 2.43456 2.8778    |

### HPLC chromatogram of racemic 3ag

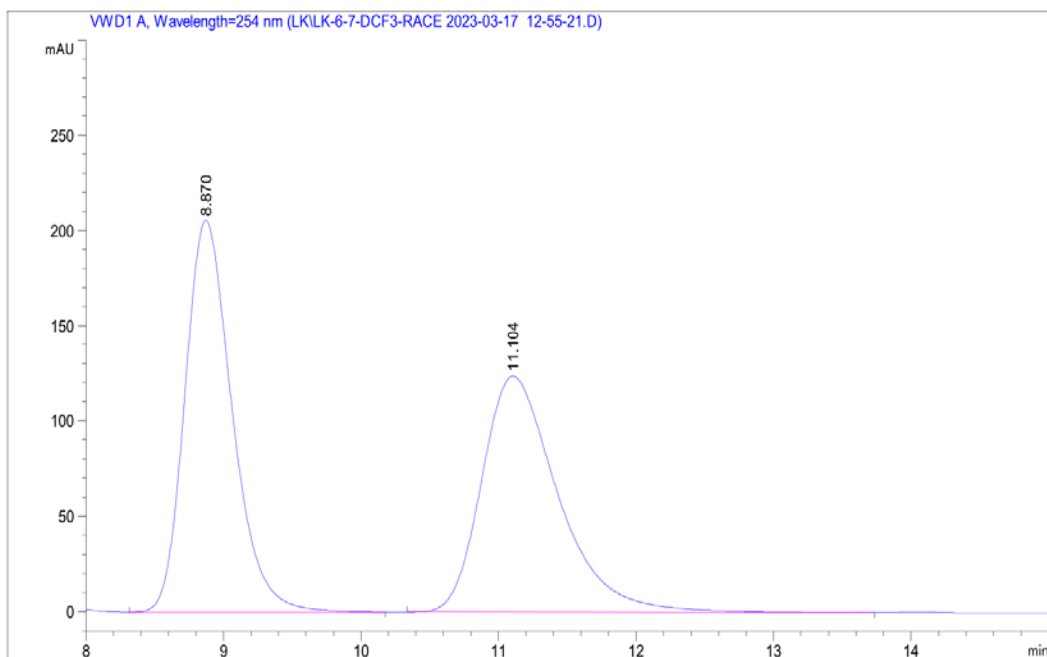

| # | [min]  | [min] | [mAU*s] | [mAU]      | %                 |
|---|--------|-------|---------|------------|-------------------|
| 1 | 8.870  | BB    | 0.3646  | 4890.48291 | 205.54852 50.5890 |
| 2 | 11.104 | BB    | 0.5872  | 4765.24268 | 123.48866 49.2934 |

### HPLC chromatogram of chiral 3ag

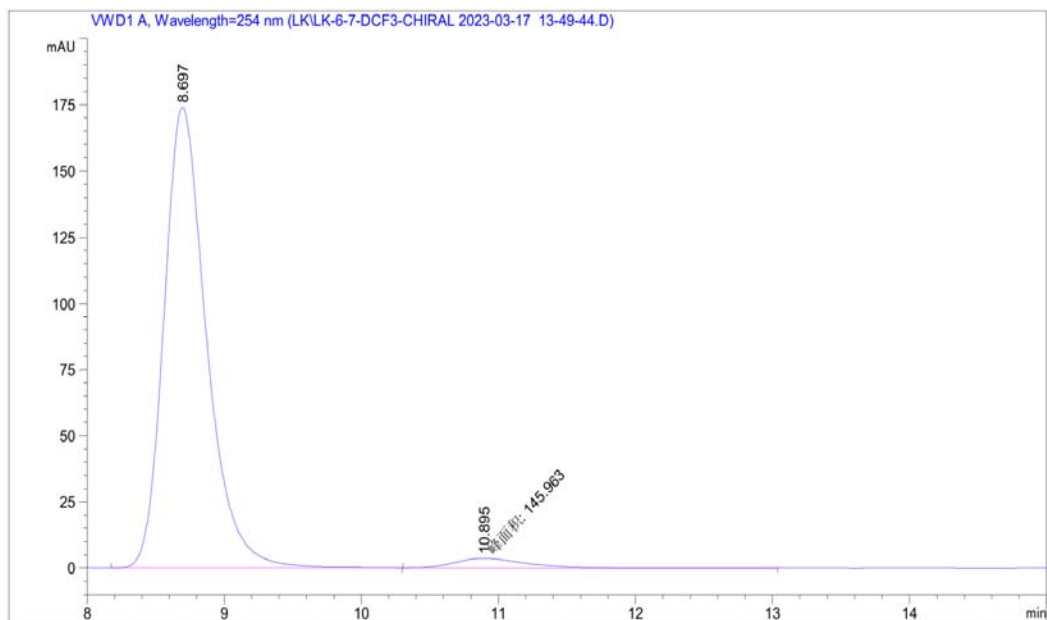

| # | [min]  | [min] | [mAU*s] | [mAU]      | %                 |
|---|--------|-------|---------|------------|-------------------|
| 1 | 8.697  | BB    | 0.3261  | 3745.42212 | 174.03154 96.2491 |
| 2 | 10.895 | MM    | 0.6603  | 145.96313  | 3.68409 3.7509    |

### HPLC chromatogram of racemic 3ah

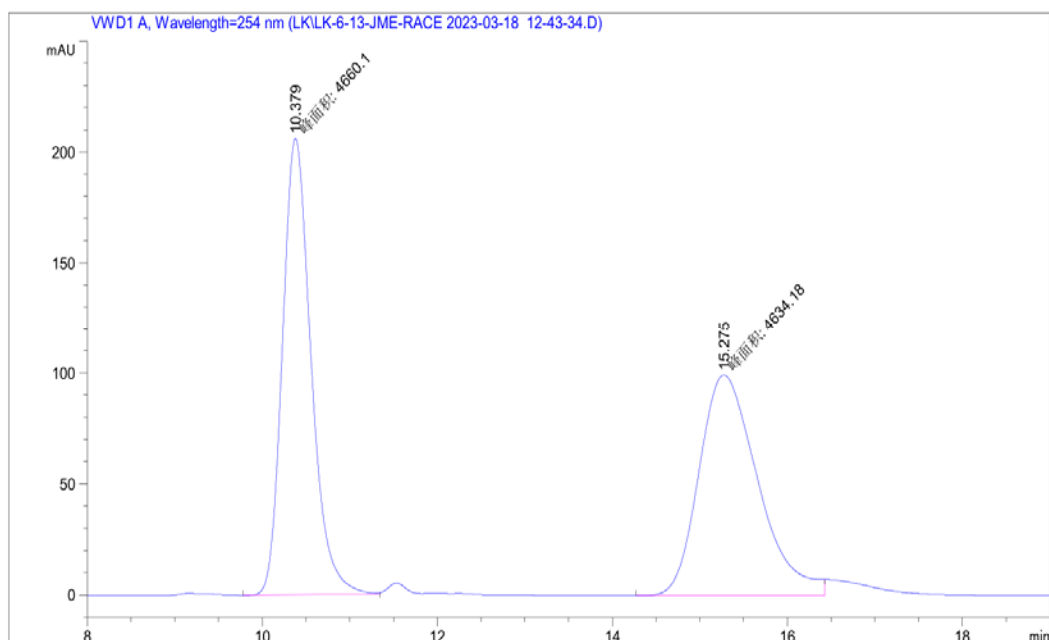

| # | [min]  | [min] | [mAU*s] | [mAU]      | %         |         |
|---|--------|-------|---------|------------|-----------|---------|
| 1 | 10.379 | MM    | 0.3772  | 4660.09619 | 205.93436 | 50.1394 |
| 2 | 15.275 | MM    | 0.7773  | 4634.18311 | 99.36477  | 49.8606 |

### HPLC chromatogram of chiral 3ah

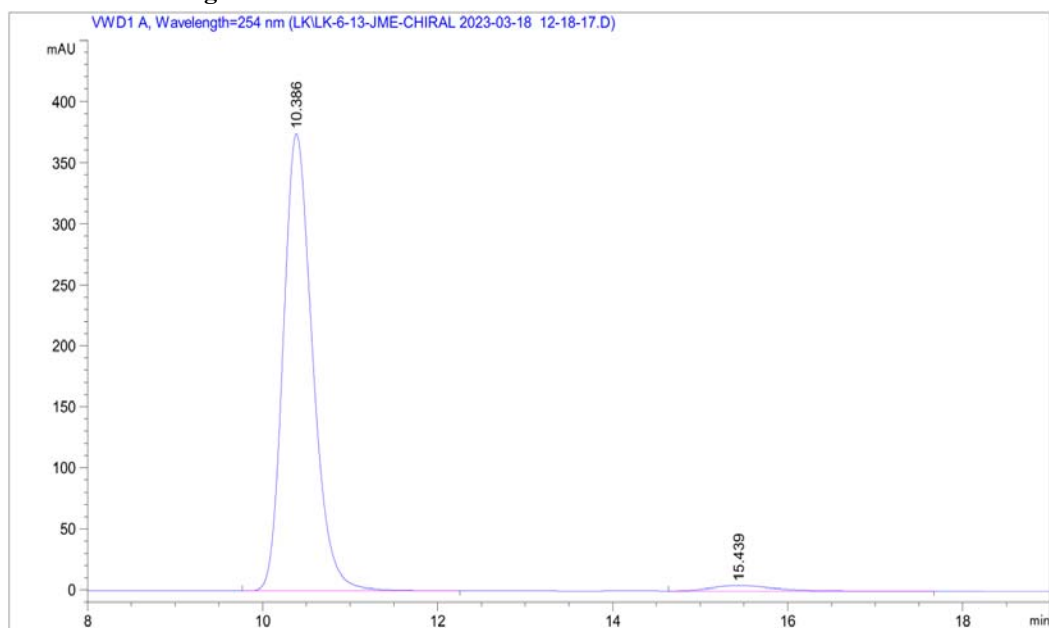

| # | [min]  | [min] | [mAU*s] | [mAU]      | %         |         |
|---|--------|-------|---------|------------|-----------|---------|
| 1 | 10.386 | BB    | 0.3574  | 8676.68262 | 374.31039 | 97.5986 |
| 2 | 15.439 | BB    | 0.7222  | 213.48985  | 4.43024   | 2.4014  |

### HPLC chromatogram of racemic 3ai

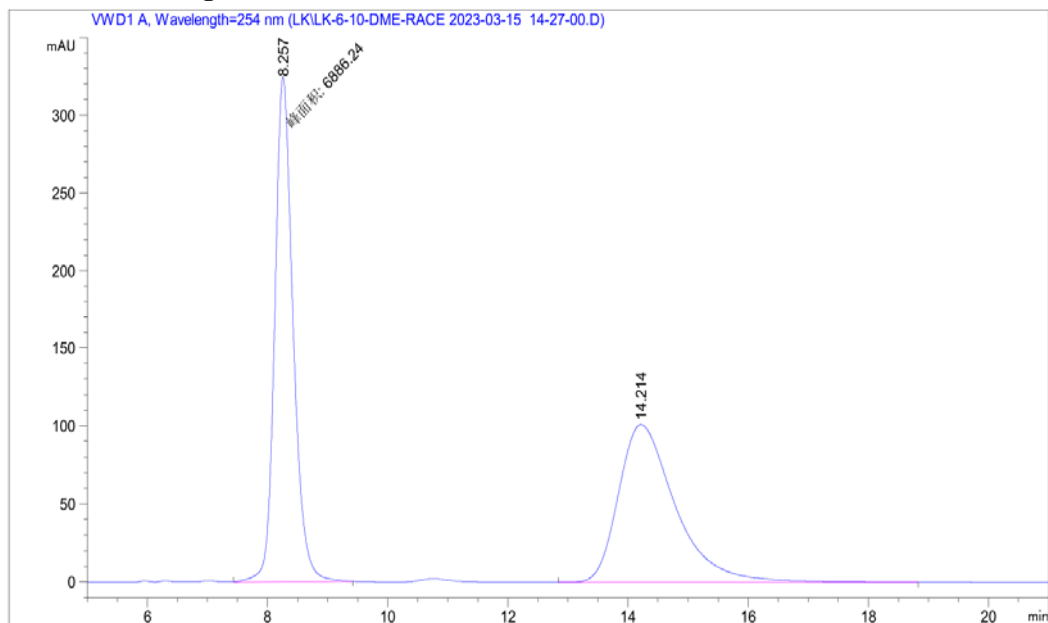

| # | [min]  | [min] | [mAU*s] | [mAU]      | %         |         |
|---|--------|-------|---------|------------|-----------|---------|
| 1 | 8.257  | MM    | 0.3537  | 6886.24463 | 324.51385 | 50.7771 |
| 2 | 14.214 | BB    | 1.0010  | 6675.47949 | 101.14153 | 49.2229 |

### HPLC chromatogram of chiral 3ai

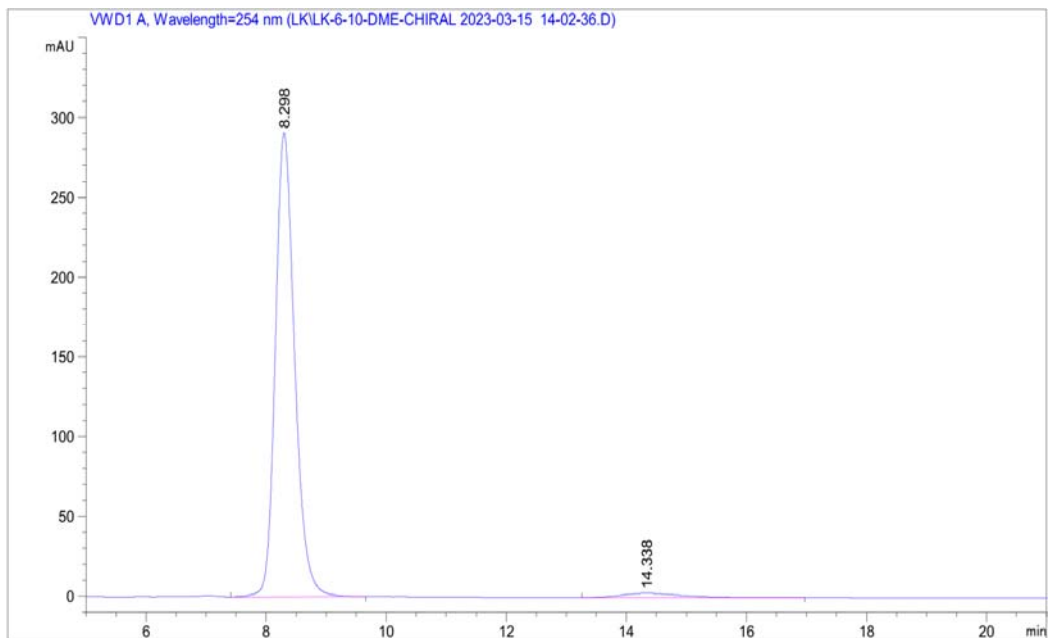

| # | [min]  | [min] | [mAU*s] | [mAU]      | %         |         |
|---|--------|-------|---------|------------|-----------|---------|
| 1 | 8.298  | BB    | 0.3428  | 6494.64502 | 290.53421 | 97.2380 |
| 2 | 14.338 | BB    | 0.9233  | 184.47995  | 2.69597   | 2.7620  |

### HPLC chromatogram of racemic 3aj

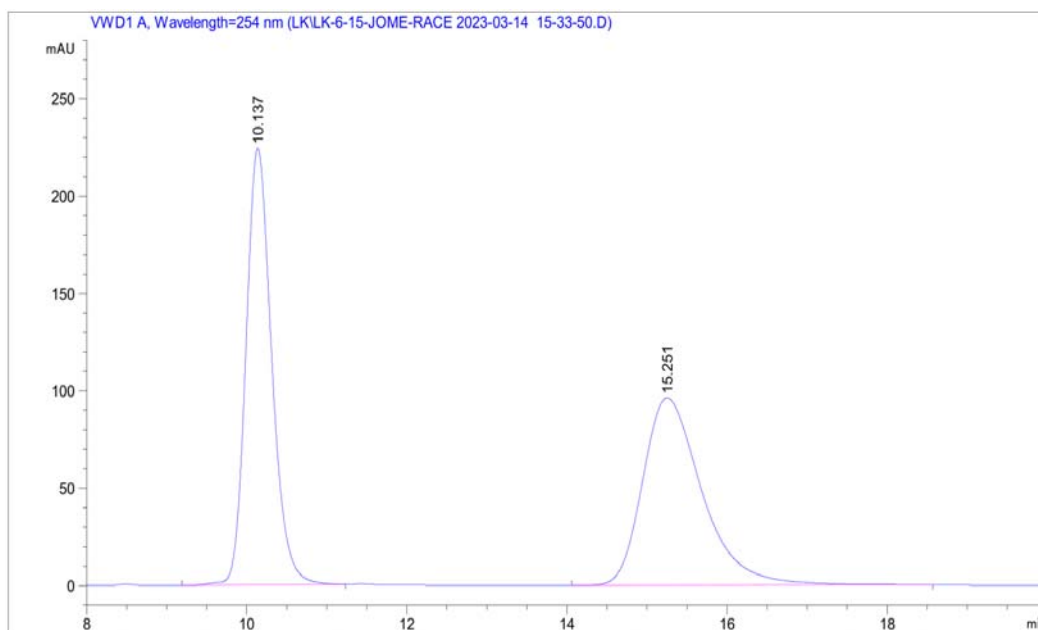

# [min] [min] [mAU\*s] [mAU] %

-----|-----|-----|-----|-----|-----|  
**1 10.137 BB 0.3432 4997.22559 224.04471 50.2172**  
**2 15.251 BB 0.7989 4954.00635 96.02008 49.7828**

### HPLC chromatogram of chiral 3aj

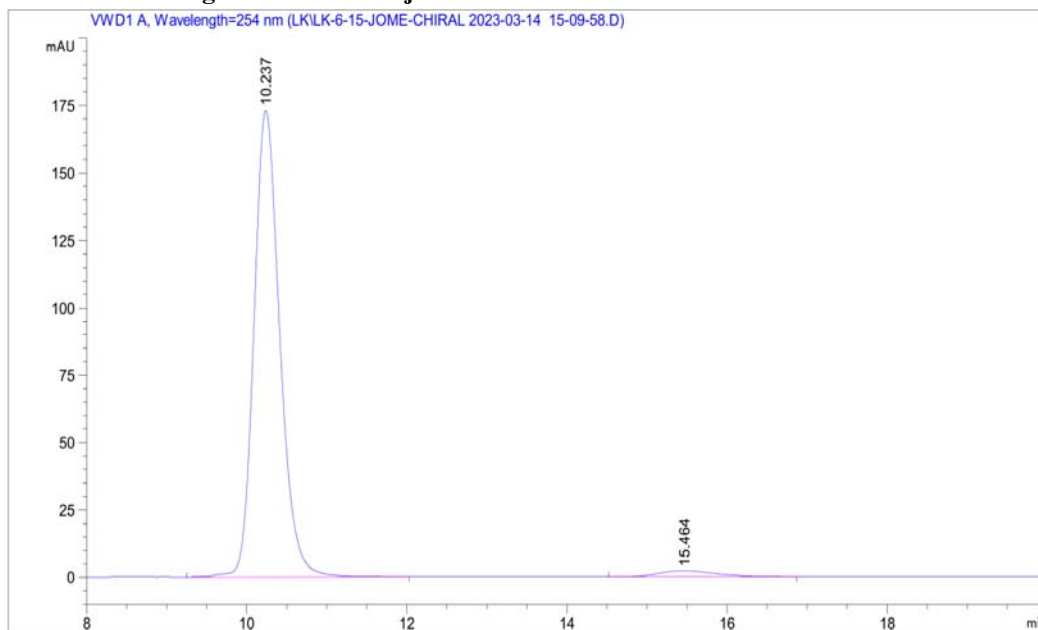

# [min] [min] [mAU\*s] [mAU] %

-----|-----|-----|-----|-----|-----|  
**1 10.237 BB 0.3444 3876.92432 173.04712 97.2453**  
**2 15.464 BB 0.6792 109.82150 2.25879 2.7547**

### HPLC chromatogram of racemic 3ak

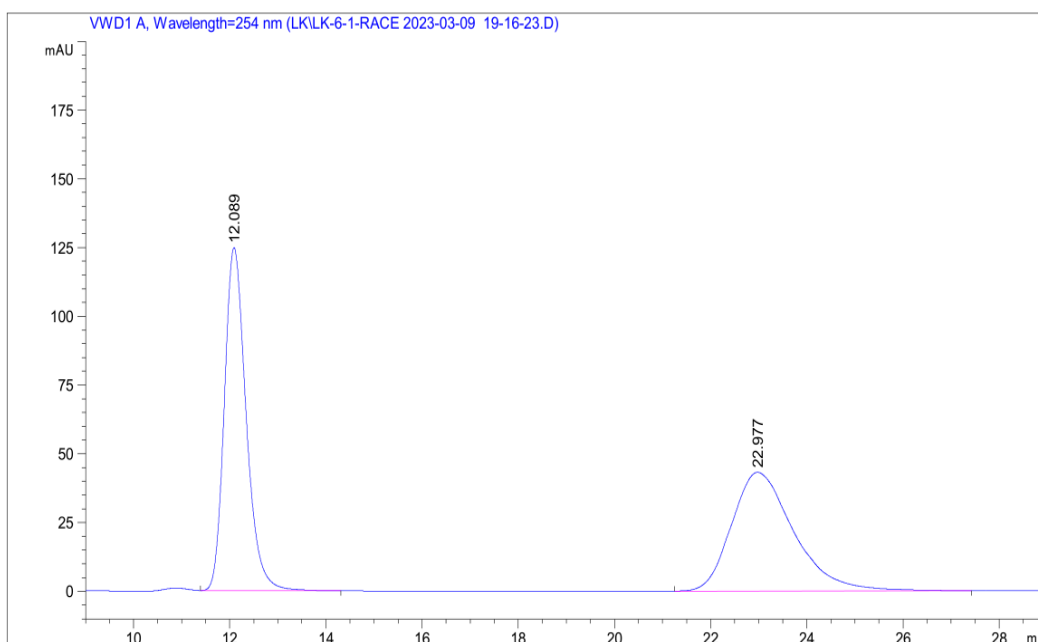

| # | [min]  | [min] | [mAU*s] | [mAU]      | %         |         |
|---|--------|-------|---------|------------|-----------|---------|
| 1 | 12.089 | BB    | 0.4815  | 3915.87061 | 124.65032 | 50.4042 |
| 2 | 22.977 | BB    | 1.3103  | 3853.07227 | 43.12831  | 49.5958 |

### HPLC chromatogram of chiral 3ak

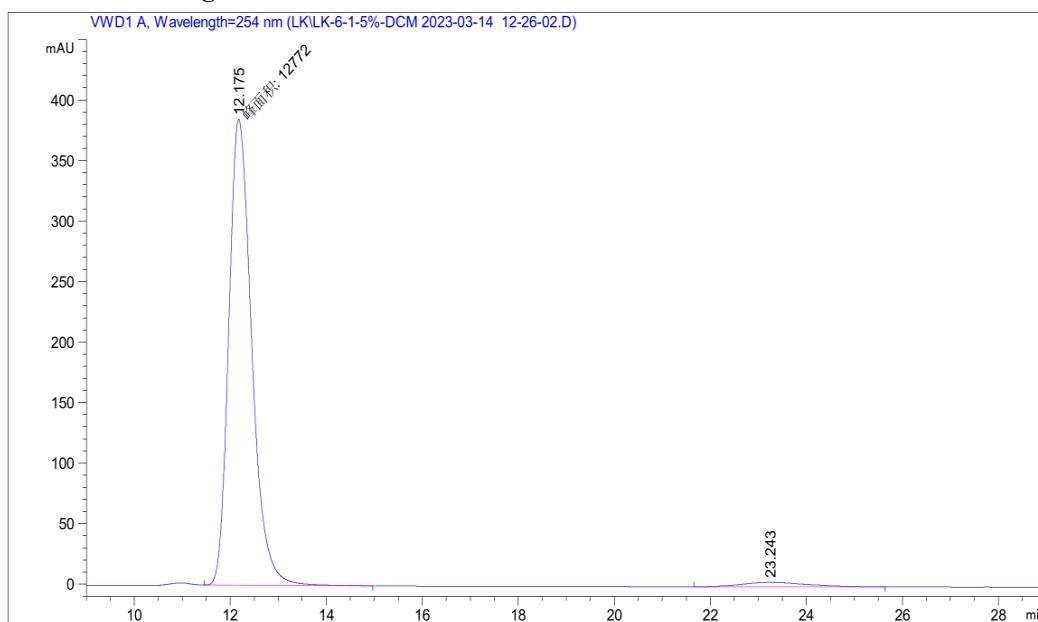

| # | [min]  | [min] | [mAU*s] | [mAU]     | %         |         |
|---|--------|-------|---------|-----------|-----------|---------|
| 1 | 12.175 | MM    | 0.5527  | 1.27720e4 | 385.14749 | 97.3463 |
| 2 | 23.243 | BB    | 1.1427  | 348.16599 | 3.75874   | 2.6537  |

### HPLC chromatogram of racemic 3aI

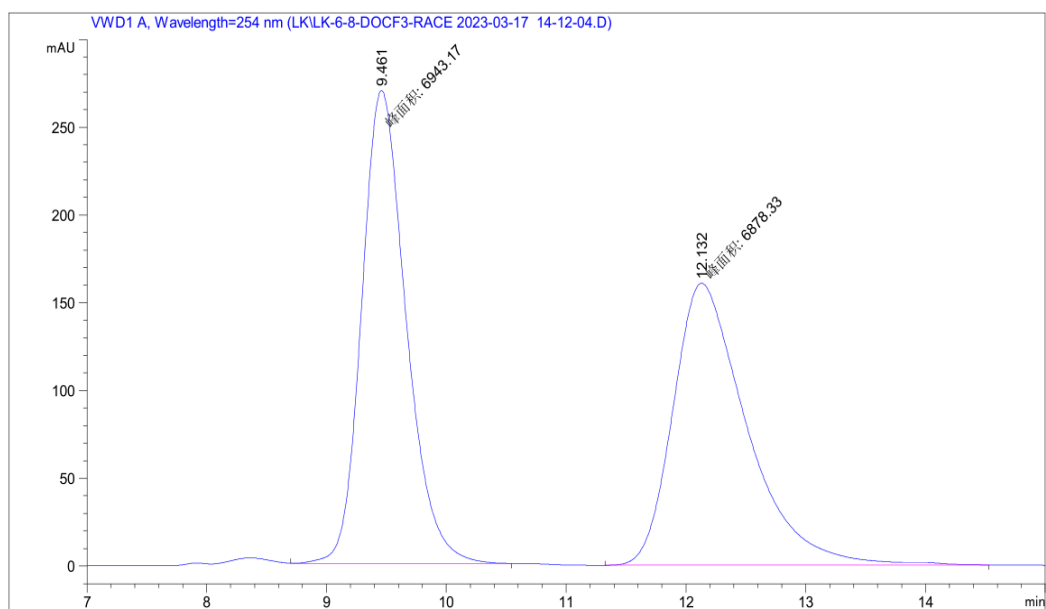

| # | [min]  | [min] | [mAU*s]           | [mAU]     | %       |
|---|--------|-------|-------------------|-----------|---------|
| 1 | 9.461  | MM    | 0.4294 6943.16943 | 269.47696 | 50.2346 |
| 2 | 12.132 | MM    | 0.7135 6878.32861 | 160.67171 | 49.7654 |

### HPLC chromatogram of chiral 3aI

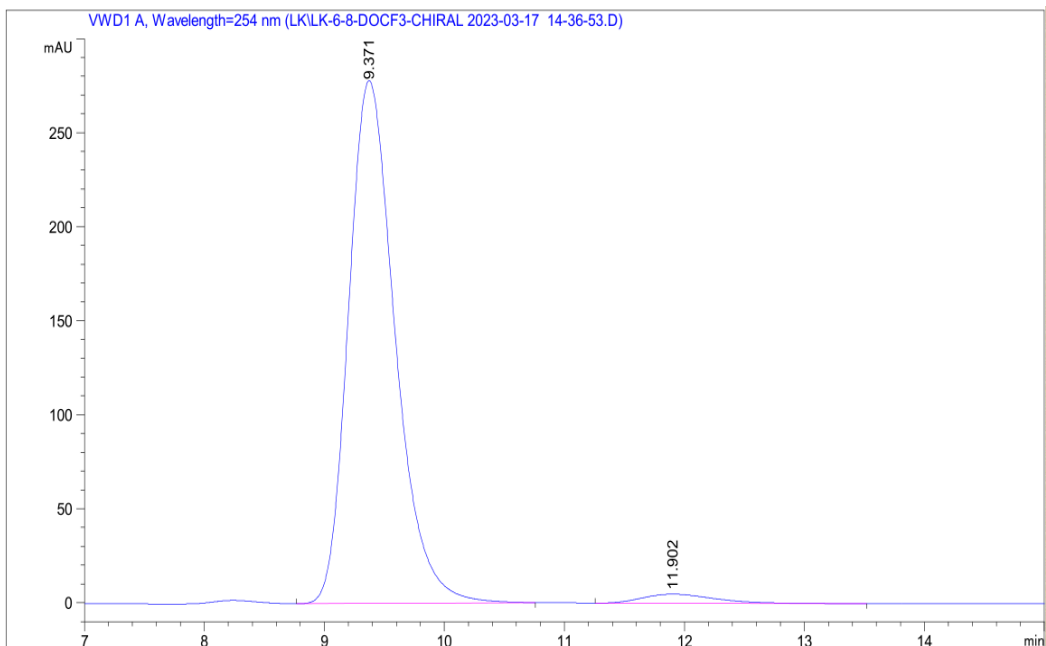

| # | [min]  | [min] | [mAU*s]           | [mAU]     | %       |
|---|--------|-------|-------------------|-----------|---------|
| 1 | 9.371  | BB    | 0.4156 7494.07959 | 277.94095 | 97.3069 |
| 2 | 11.902 | BB    | 0.6323 207.40701  | 4.86603   | 2.6931  |



### HPLC chromatogram of racemic 3am

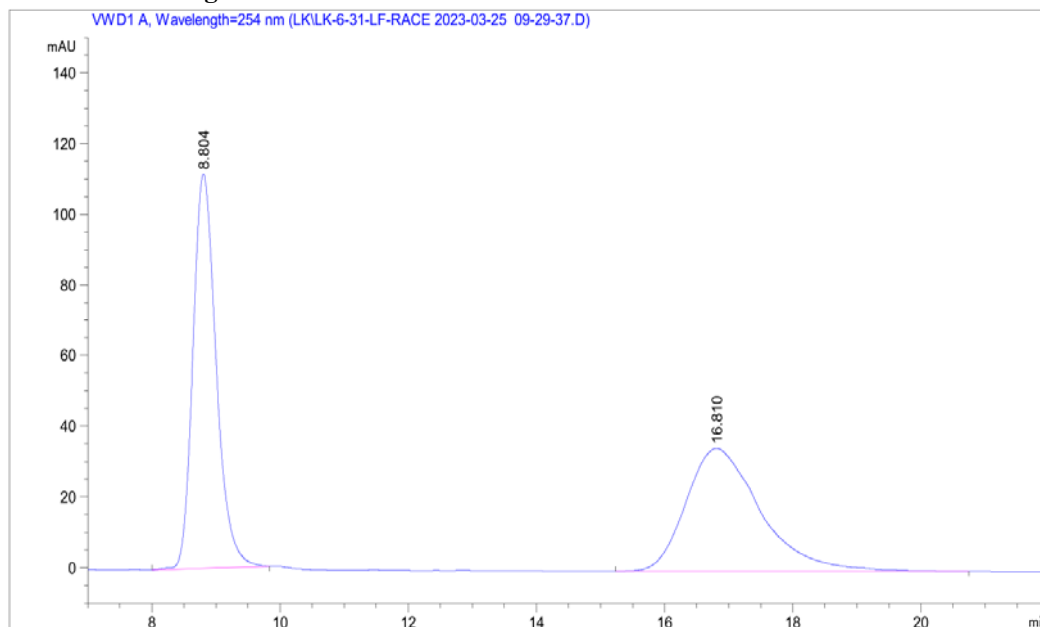

| # | [min]  | [min] | [mAU*s] | [mAU]      | %         |         |
|---|--------|-------|---------|------------|-----------|---------|
| 1 | 8.804  | BB    | 0.3889  | 2798.58862 | 111.47934 | 50.1383 |
| 2 | 16.810 | BB    | 1.1751  | 2783.14746 | 34.61430  | 49.8617 |

### HPLC chromatogram of chiral 3am

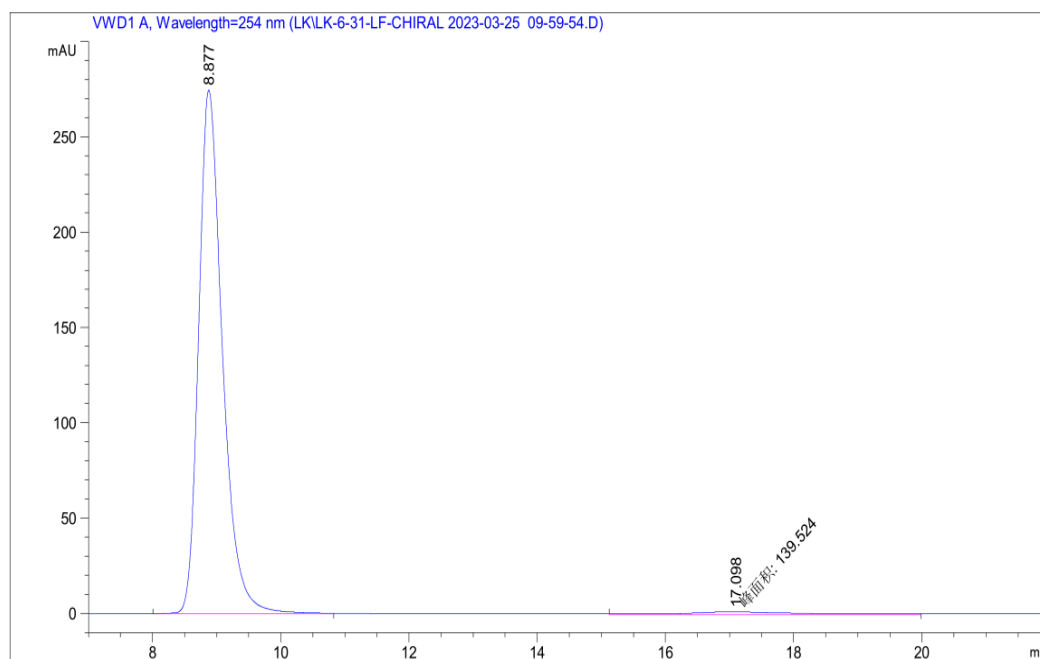

| # | [min]  | [min] | [mAU*s] | [mAU]      | %         |         |
|---|--------|-------|---------|------------|-----------|---------|
| 1 | 8.877  | BB    | 0.3893  | 7067.05469 | 274.51691 | 98.0639 |
| 2 | 17.098 | MM    | 1.8127  | 139.52391  | 1.28282   | 1.9361  |

### HPLC chromatogram of racemic 3an

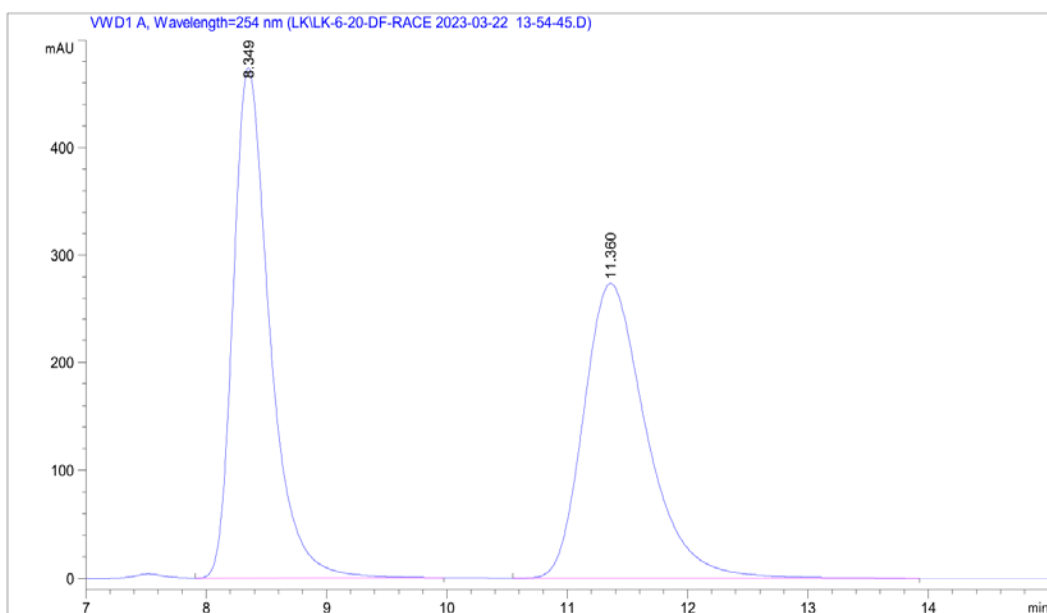

# [min] [min] [mAU\*s] [mAU] %

-----|-----|-----|-----|-----|-----|

1 8.349 VB 0.3194 9961.03223 473.59622 50.2937

2 11.360 BB 0.5470 9844.69141 273.48209 49.7063

### HPLC chromatogram of chiral 3an

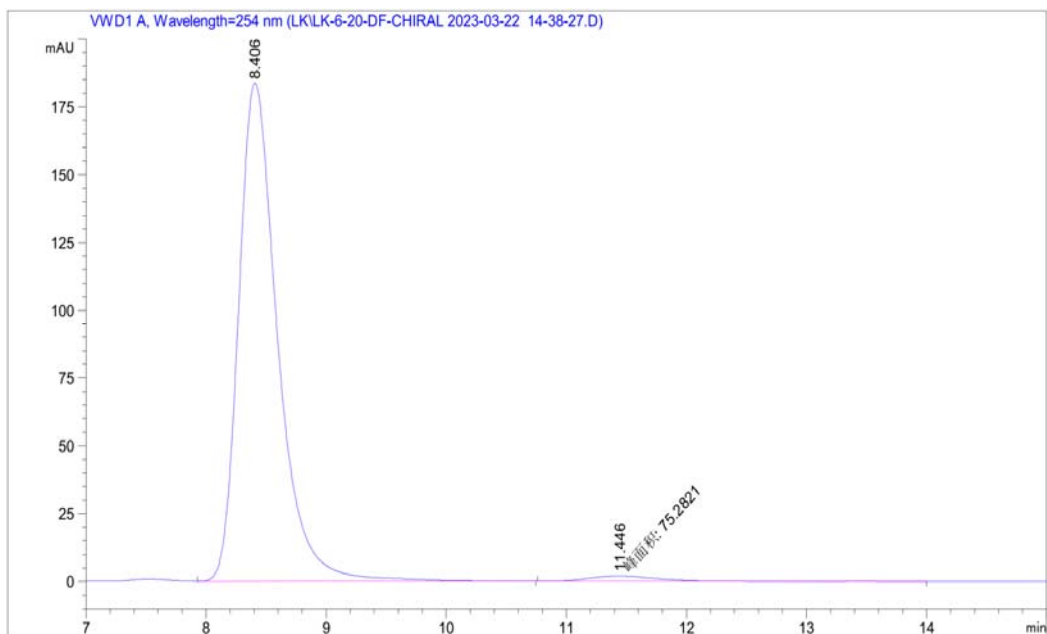

# [min] [min] [mAU\*s] [mAU] %

-----|-----|-----|-----|-----|-----|

1 8.406 BB 0.3416 4132.44189 183.61232 98.2109

2 11.446 MM 0.6703 75.28205 1.87183 1.7891

### HPLC chromatogram of racemic 3ao

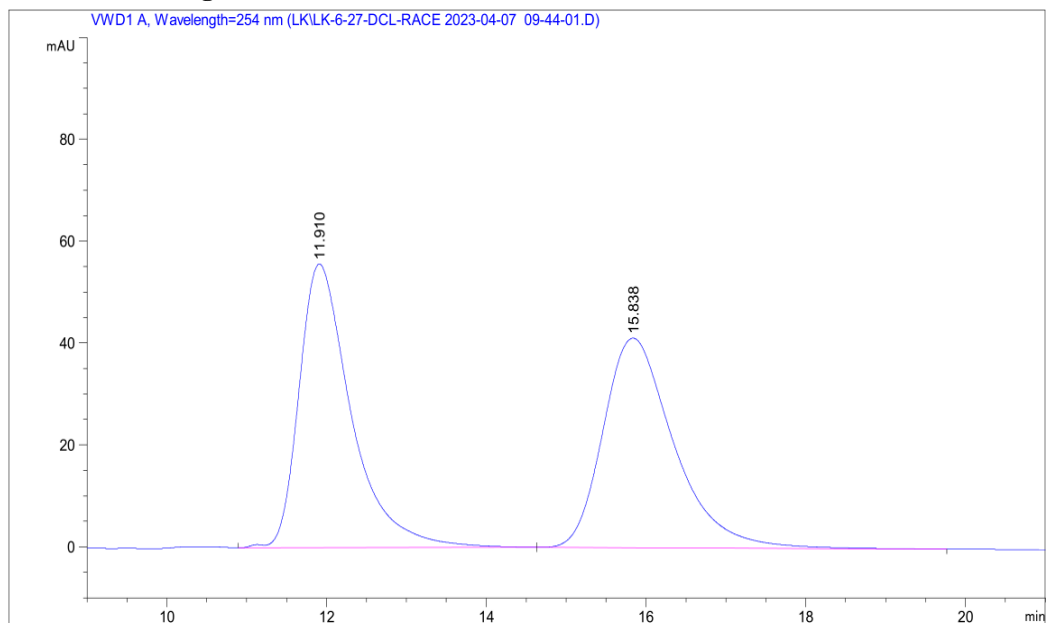

| # | [min]  | [min] | [mAU*s]  | [mAU]      | %        |         |
|---|--------|-------|----------|------------|----------|---------|
| 1 | 11.910 | VB    | R 0.6896 | 2528.25977 | 55.69974 | 49.9118 |
| 2 | 15.838 | BB    | 0.9312   | 2537.19312 | 41.15700 | 50.0882 |

### HPLC chromatogram of chiral 3ao

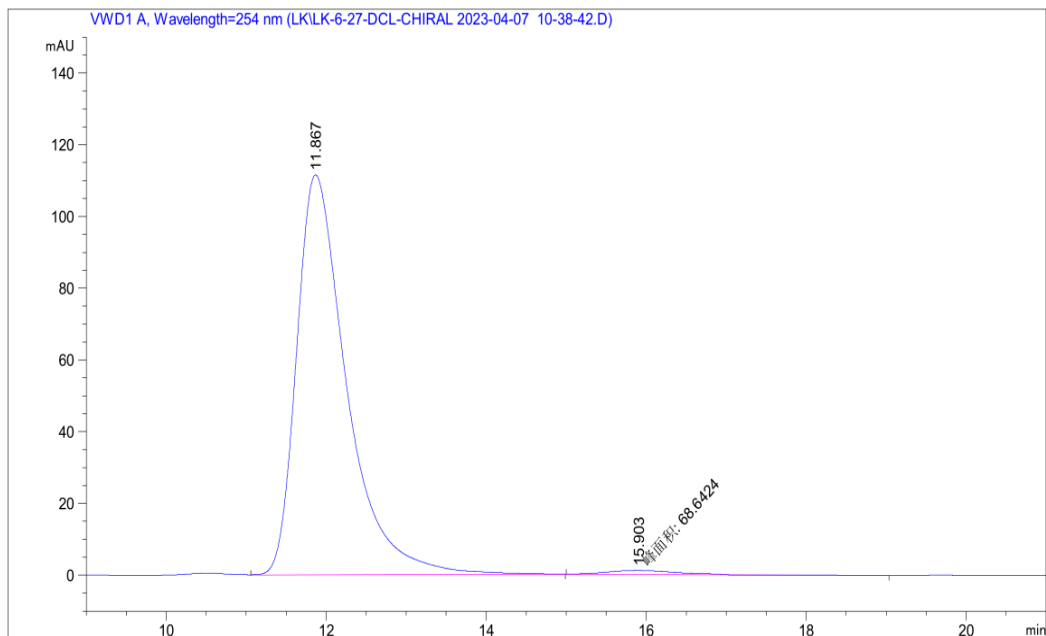

| # | [min]  | [min] | [mAU*s] | [mAU]      | %         |         |
|---|--------|-------|---------|------------|-----------|---------|
| 1 | 11.867 | BB    | 0.6498  | 4832.34521 | 111.46315 | 98.5994 |
| 2 | 15.903 | MM    | 0.9999  | 68.64243   | 1.14418   | 1.4006  |

### HPLC chromatogram of racemic 3ap

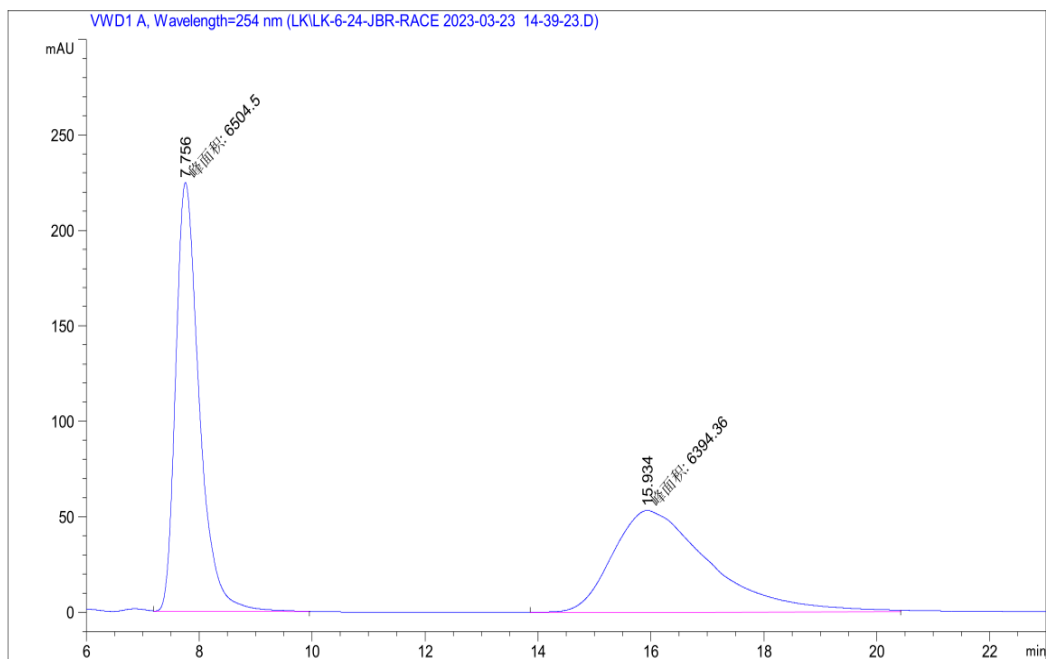

| # | [min]  | [min] | [mAU*s] | [mAU]      | %                 |
|---|--------|-------|---------|------------|-------------------|
| 1 | 7.756  | MM    | 0.4831  | 6504.49805 | 224.40334 50.4269 |
| 2 | 15.934 | MM    | 1.9966  | 6394.36084 | 53.37725 49.5731  |

### HPLC chromatogram of chiral 3ap

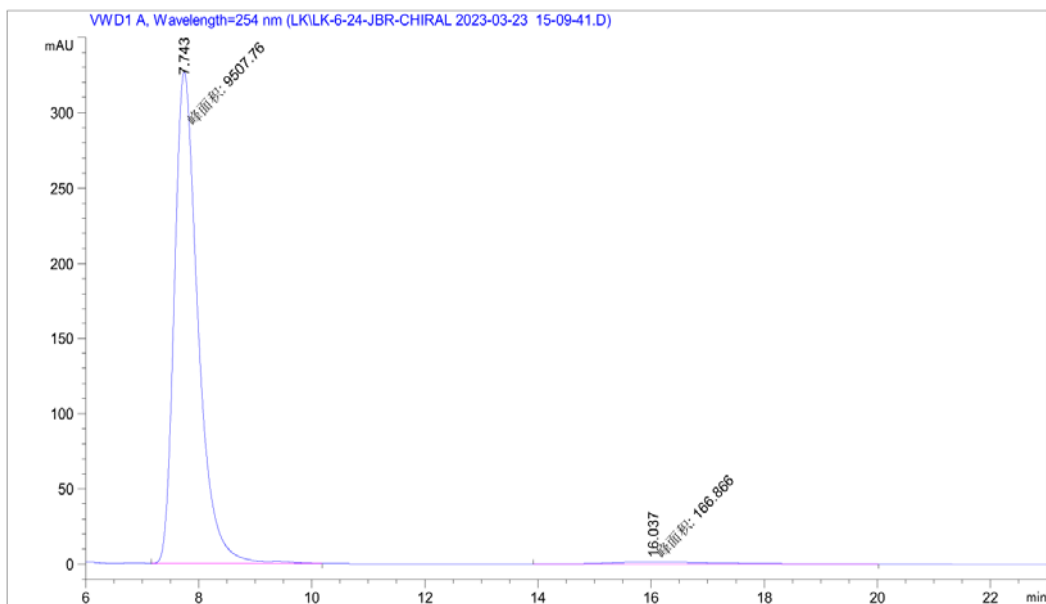

| # | [min]  | [min] | [mAU*s] | [mAU]      | %                 |
|---|--------|-------|---------|------------|-------------------|
| 1 | 7.743  | MM    | 0.4853  | 9507.76367 | 326.55042 98.2752 |
| 2 | 16.037 | MM    | 1.9778  | 166.86604  | 1.40619 1.7248    |

### HPLC chromatogram of racemic 3aq

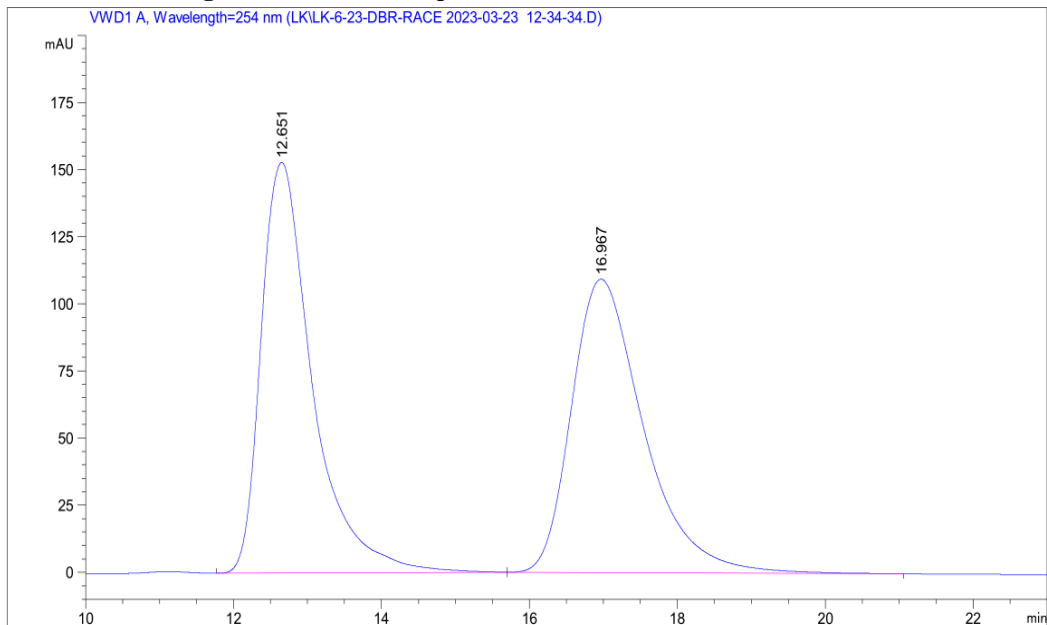

# [min] [min] [mAU\*s] [mAU] %

| # | [min]  | [min] | [mAU*s] | [mAU]      | %         |         |
|---|--------|-------|---------|------------|-----------|---------|
| 1 | 12.651 | BB    | 0.7380  | 7367.92090 | 152.95476 | 49.9532 |
| 2 | 16.967 | BB    | 1.0251  | 7381.72314 | 109.26917 | 50.0468 |

### HPLC chromatogram of chiral 3aq

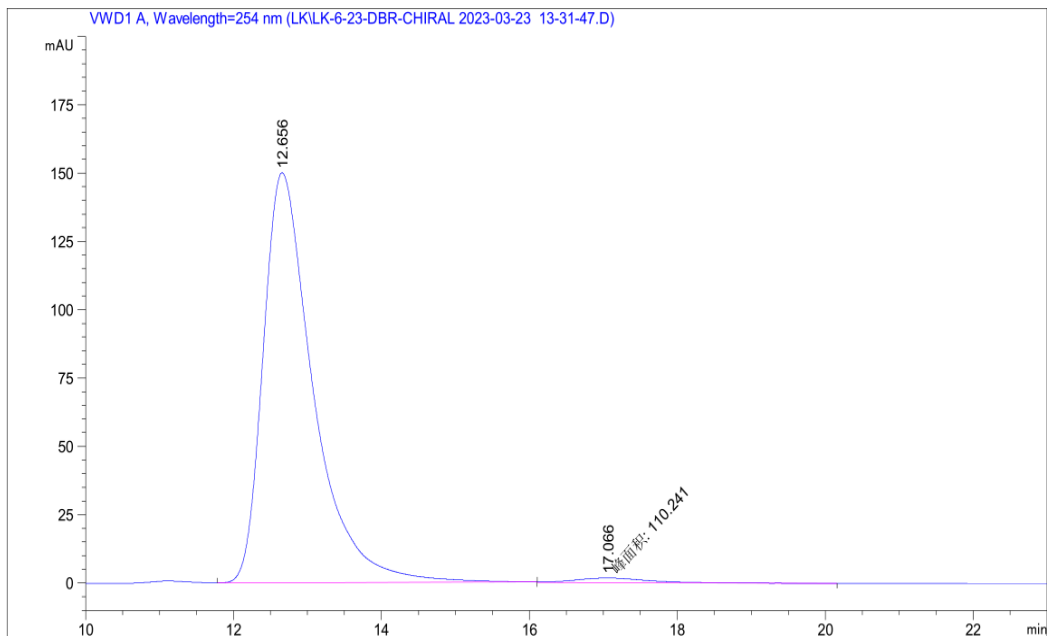

# [min] [min] [mAU\*s] [mAU] %

| # | [min]  | [min] | [mAU*s] | [mAU]      | %         |         |
|---|--------|-------|---------|------------|-----------|---------|
| 1 | 12.656 | BB    | 0.7009  | 7060.32764 | 150.05360 | 98.4626 |
| 2 | 17.066 | MM    | 1.0892  | 110.24139  | 1.68686   | 1.5374  |

### HPLC chromatogram of racemic 3ar

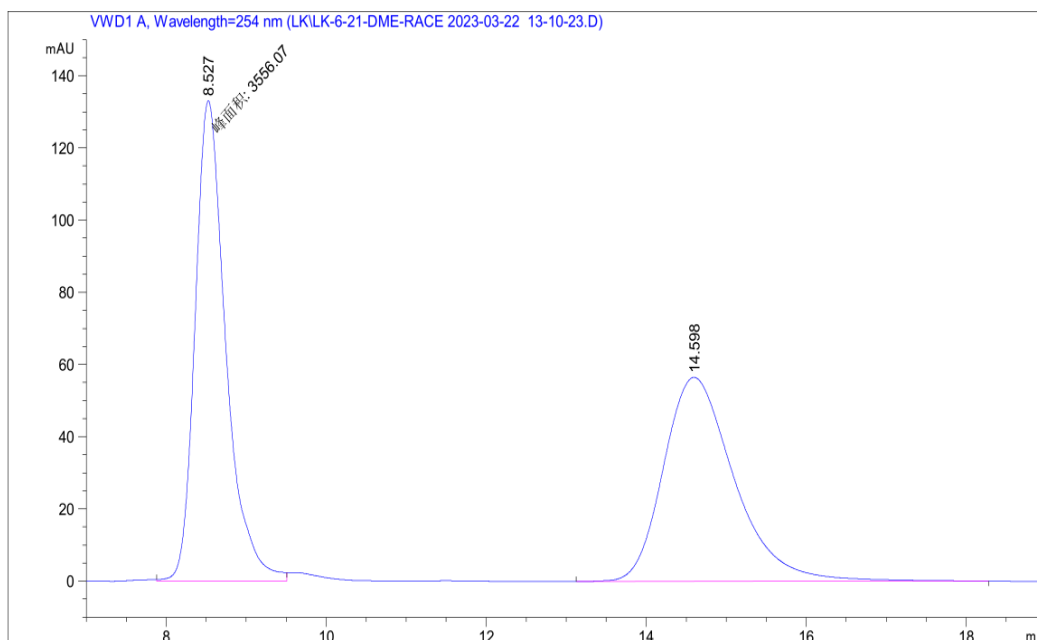

| # | [min]  | [min] | [mAU*s]           | [mAU]     | %       |
|---|--------|-------|-------------------|-----------|---------|
| 1 | 8.527  | MM    | 0.4454 3556.06885 | 133.05405 | 50.5521 |
| 2 | 14.598 | BB    | 0.9398 3478.38794 | 56.53533  | 49.4479 |

### HPLC chromatogram of chiral 3ar

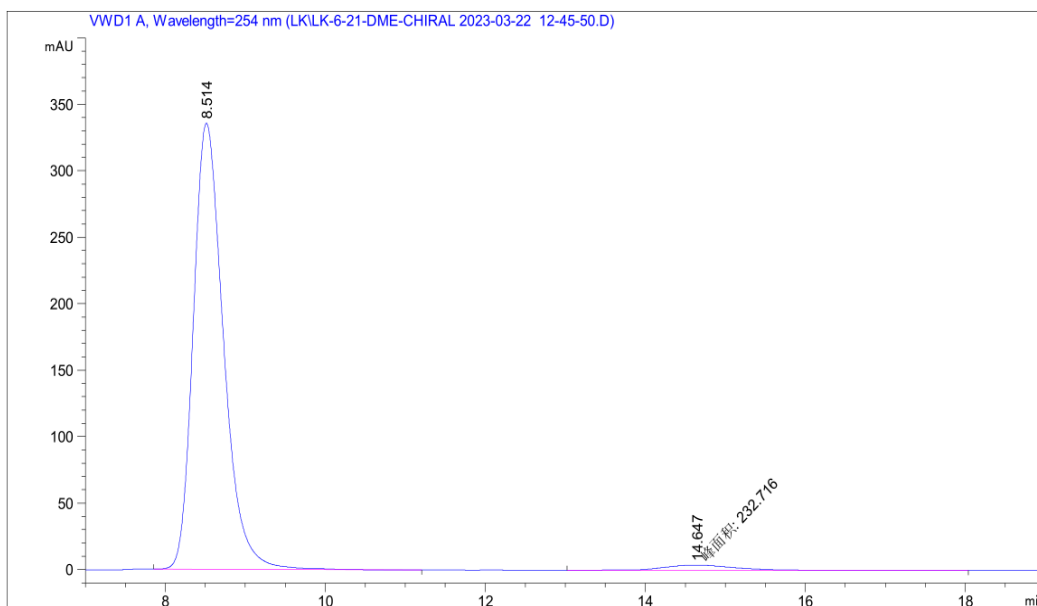

| # | [min]  | [min] | [mAU*s]           | [mAU]     | %       |
|---|--------|-------|-------------------|-----------|---------|
| 1 | 8.514  | BB    | 0.4031 8803.67578 | 335.54712 | 97.4247 |
| 2 | 14.647 | MM    | 0.9883 232.71626  | 3.92439   | 2.5753  |

### HPLC chromatogram of racemic 3as

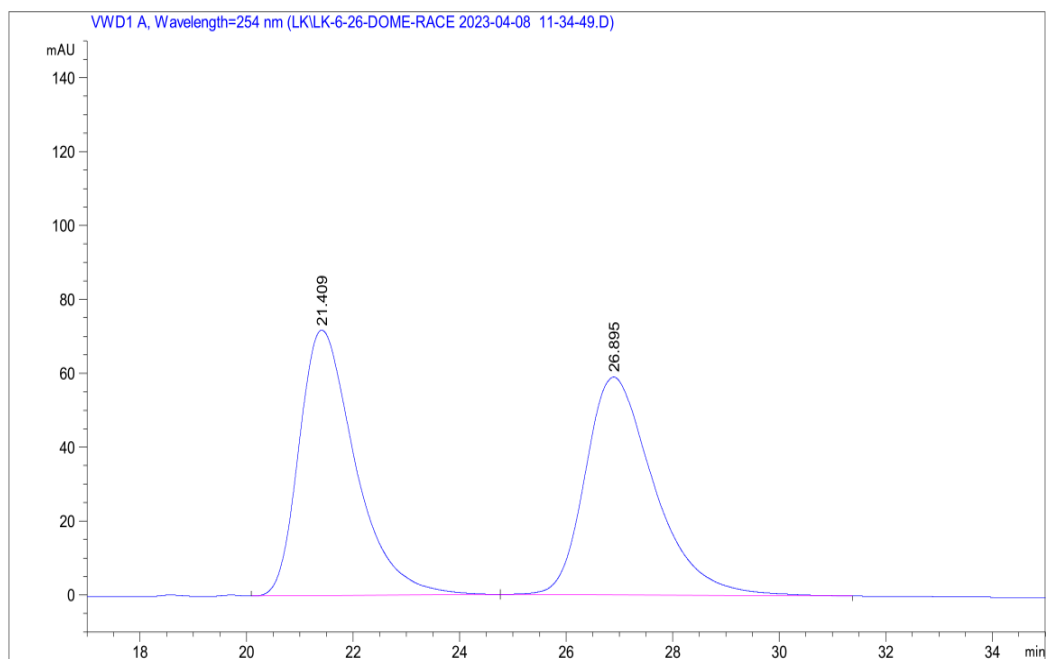

| # | [min]  | [min] | [mAU*s] | [mAU]      | %        |
|---|--------|-------|---------|------------|----------|
| 1 | 21.409 | BB    | 1.1491  | 5266.14209 | 71.84633 |
| 2 | 26.895 | BB    | 1.3372  | 5295.01221 | 58.99105 |

### HPLC chromatogram of chiral 3as

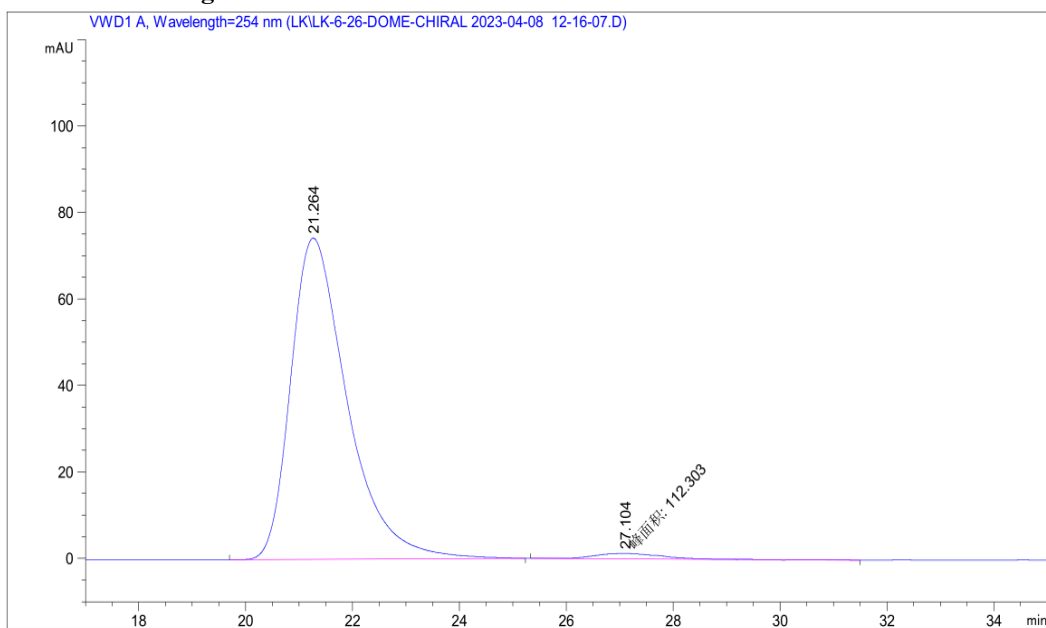

| # | [min]  | [min] | [mAU*s] | [mAU]      | %        |
|---|--------|-------|---------|------------|----------|
| 1 | 21.264 | BB    | 1.0911  | 5452.08789 | 74.30270 |
| 2 | 27.104 | MM    | 1.5147  | 112.30274  | 1.23571  |

### HPLC chromatogram of racemic 3at

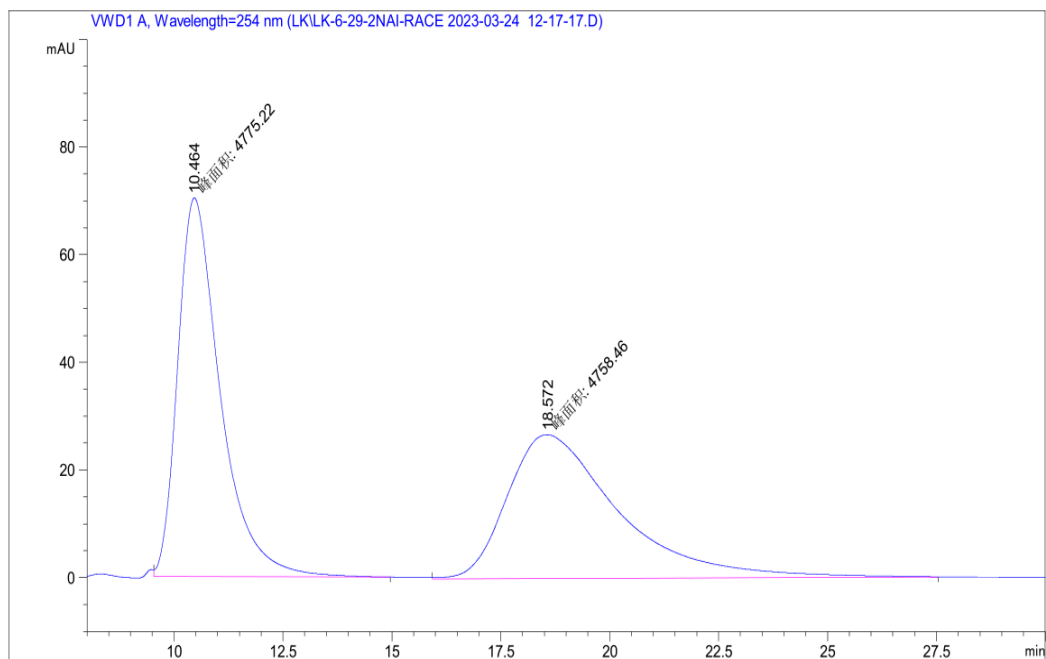

| # | [min]  | [min] | [mAU*s] | [mAU]      | %        |
|---|--------|-------|---------|------------|----------|
| 1 | 10.464 | MM    | 1.1311  | 4775.21826 | 70.36512 |
| 2 | 18.572 | MM    | 2.9684  | 4758.46045 | 26.71745 |

### HPLC chromatogram of chiral 3at

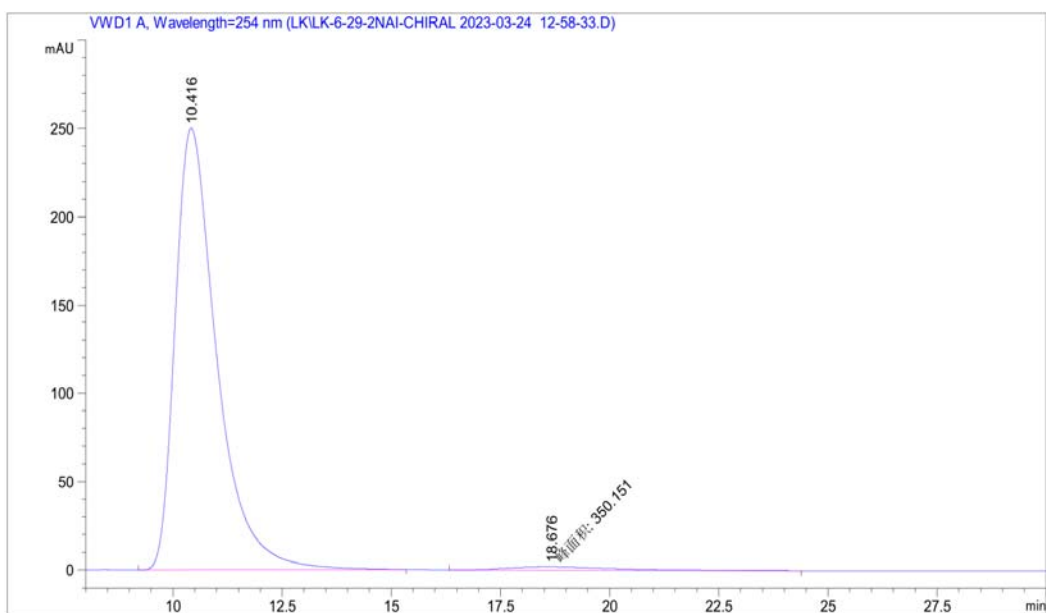

| # | [min]  | [min] | [mAU*s] | [mAU]     | %         |
|---|--------|-------|---------|-----------|-----------|
| 1 | 10.416 | BB    | 0.9997  | 1.65646e4 | 250.11142 |
| 2 | 18.676 | MM    | 2.9922  | 350.15140 | 1.95037   |



### HPLC chromatogram of racemic 3au

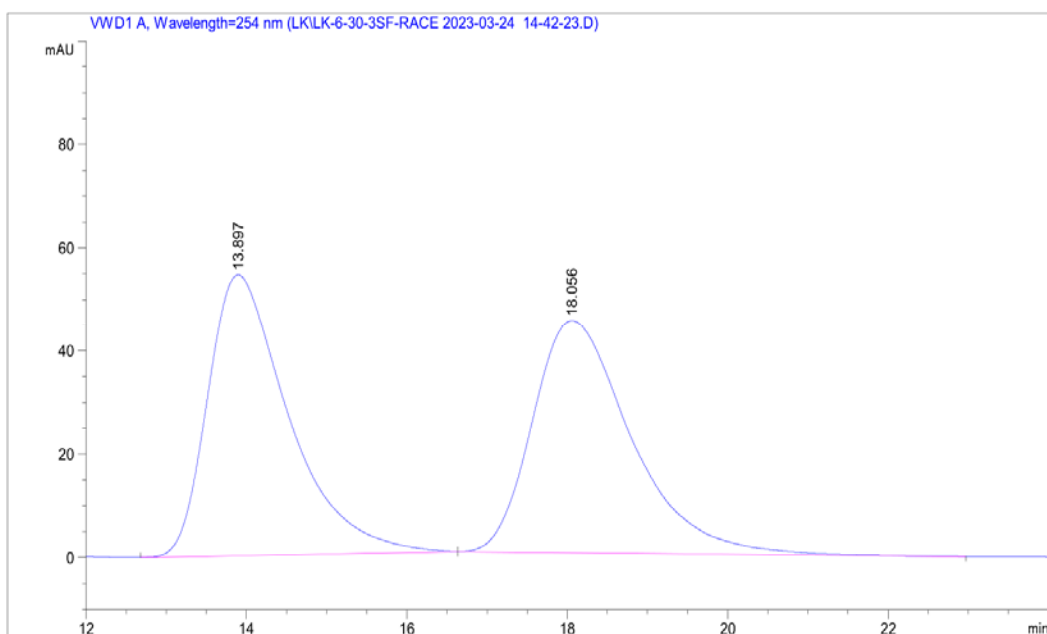

| # | [min]  | [min] | [mAU*s] | [mAU]      | %        |
|---|--------|-------|---------|------------|----------|
| 1 | 13.897 | BB    | 1.0416  | 3801.03491 | 54.44036 |
| 2 | 18.056 | BB    | 1.3131  | 3838.36328 | 44.95751 |

### HPLC chromatogram of chiral 3au

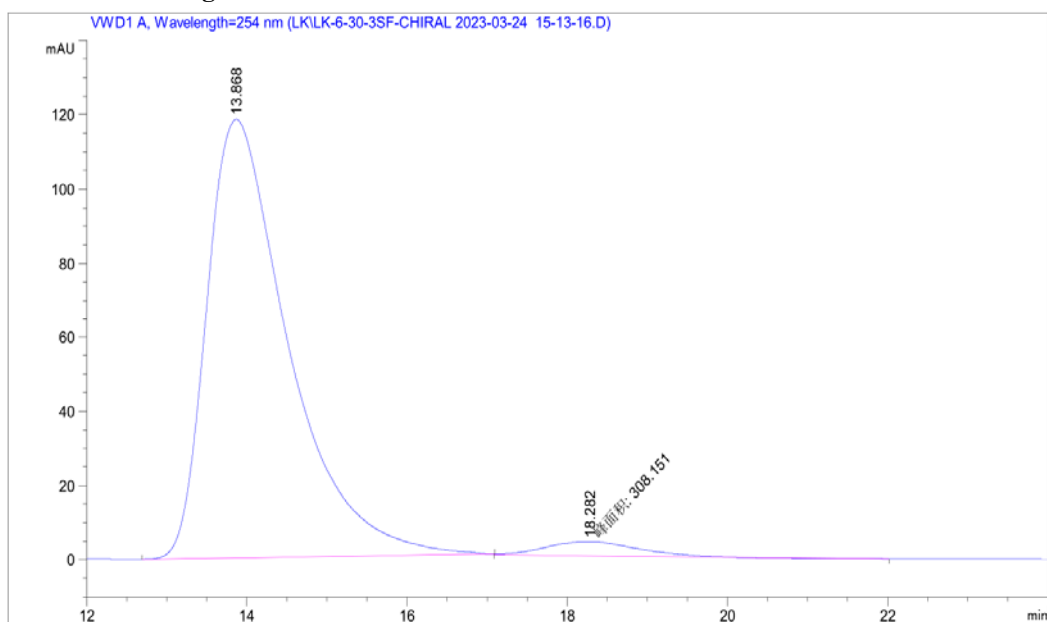

| # | [min]  | [min] | [mAU*s] | [mAU]      | %         |
|---|--------|-------|---------|------------|-----------|
| 1 | 13.868 | BB    | 1.0406  | 8357.58105 | 118.24073 |
| 2 | 18.282 | MM    | 1.3462  | 308.15146  | 3.81518   |

### HPLC chromatogram of racemic 3av

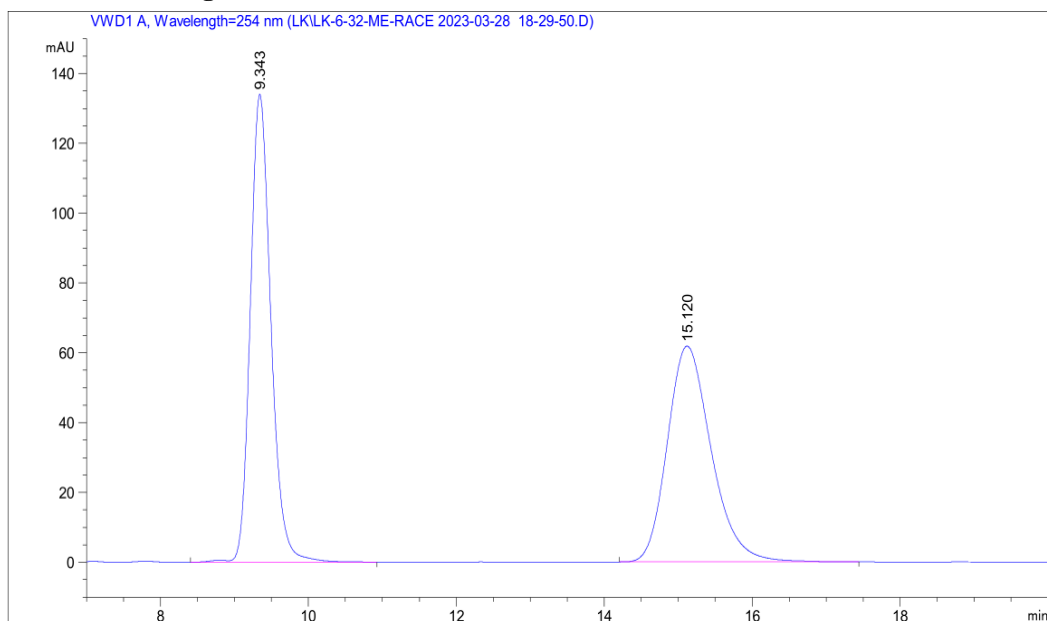

| # | [min]  | [min] | [mAU*s] | [mAU]      | %         |         |
|---|--------|-------|---------|------------|-----------|---------|
| 1 | 9.343  | VB R  | 0.2975  | 2589.20361 | 133.98419 | 50.3832 |
| 2 | 15.120 | BB    | 0.6341  | 2549.82227 | 61.83123  | 49.6168 |

### HPLC chromatogram of chiral 3av

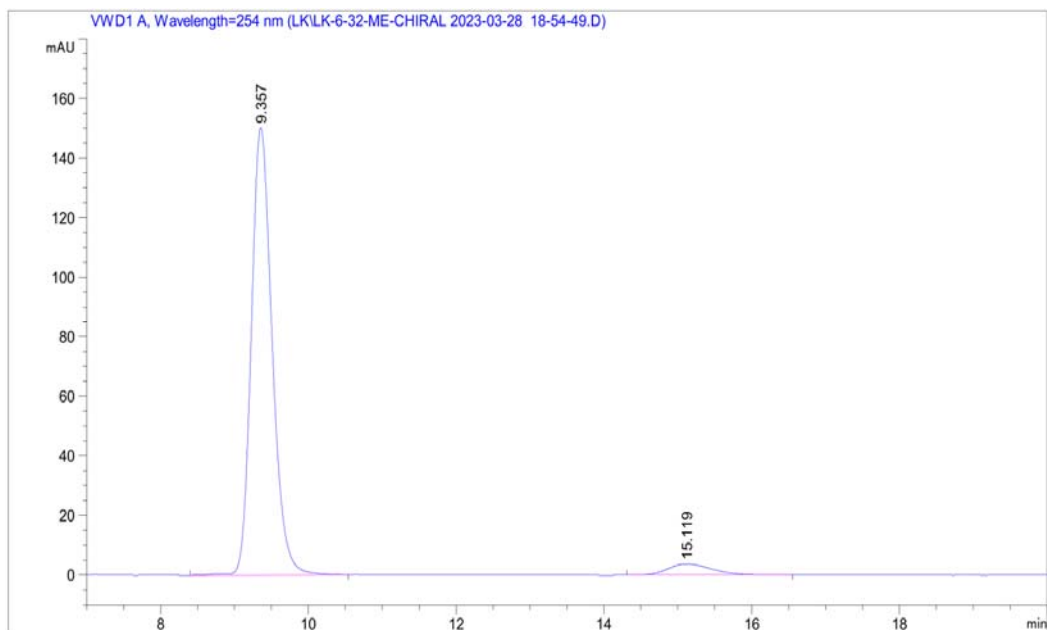

| # | [min]  | [min] | [mAU*s] | [mAU]      | %         |         |
|---|--------|-------|---------|------------|-----------|---------|
| 1 | 9.357  | VB R  | 0.3009  | 2932.26001 | 150.09129 | 94.9517 |
| 2 | 15.119 | BB    | 0.6309  | 155.90021  | 3.73543   | 5.0483  |

### HPLC chromatogram of racemic 3bk

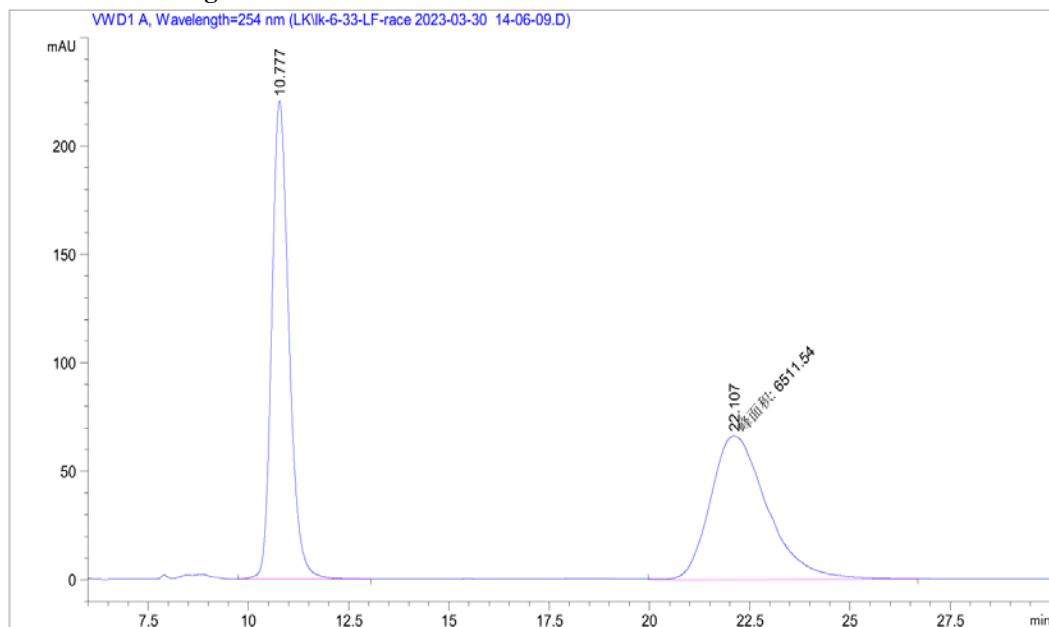

# [min] [min] [mAU\*s] [mAU] %

-----|-----|-----|-----|-----|-----|  
**1 10.777 BB 0.4589 6591.08398 220.40889 50.3035**  
**2 22.107 MM 1.6406 6511.53809 66.15160 49.6965**

### HPLC chromatogram of chiral 3bk

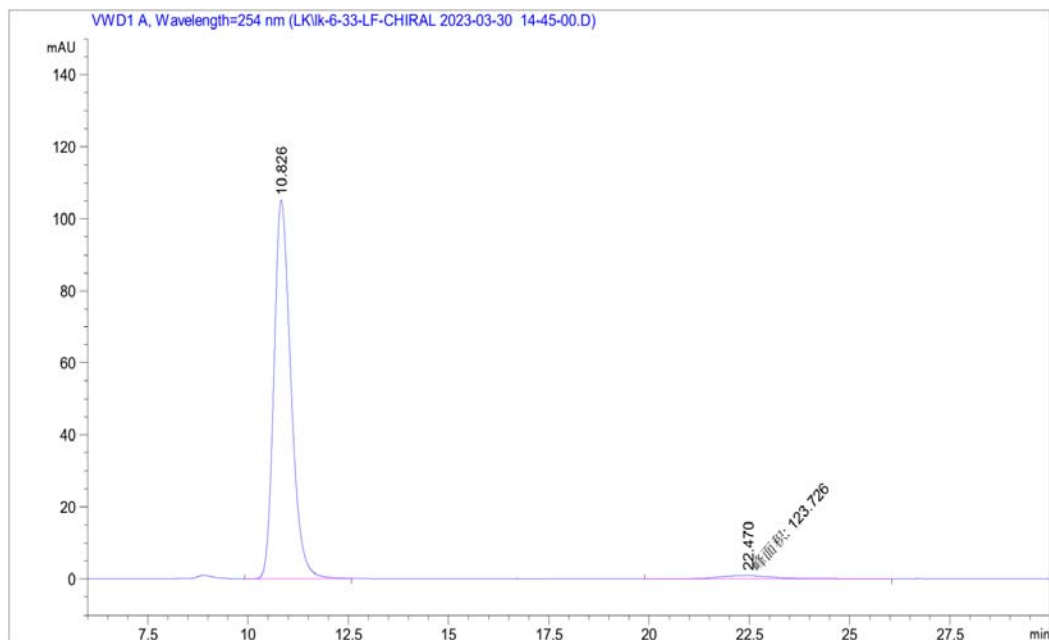

# [min] [min] [mAU\*s] [mAU] %

-----|-----|-----|-----|-----|-----|  
**1 10.826 BB 0.4517 3089.81055 105.18149 96.1498**  
**2 22.470 MM 1.8391 123.72643 1.12124 3.8502**

### HPLC chromatogram of racemic 3ck

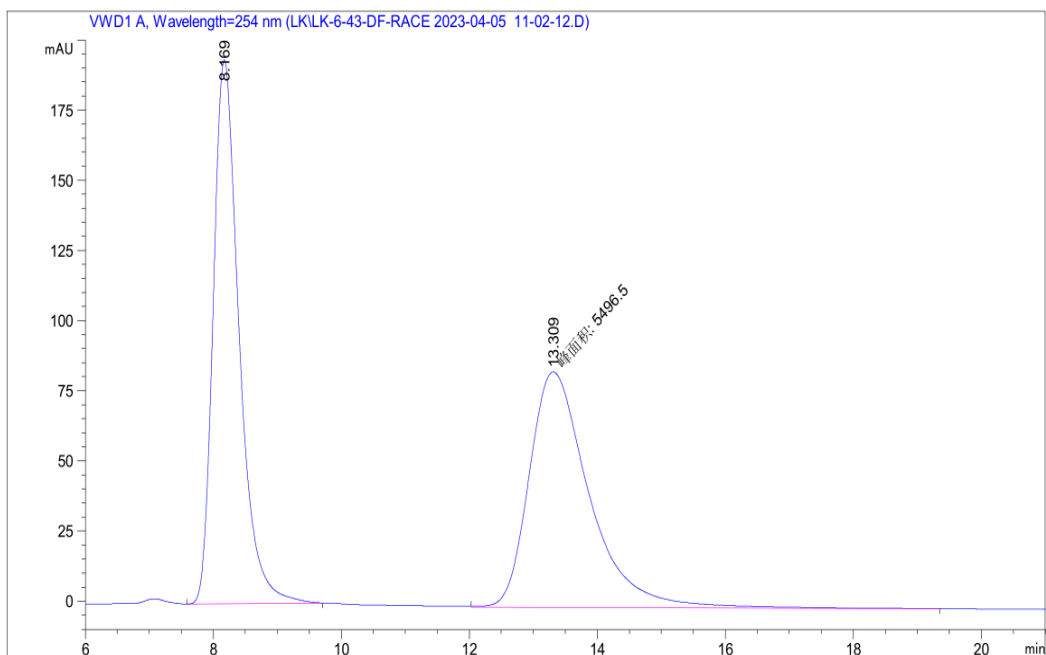

| # | [min]  | [min] | [mAU*s] | [mAU]      | %                 |
|---|--------|-------|---------|------------|-------------------|
| 1 | 8.169  | BB    | 0.4271  | 5432.75879 | 193.74809 49.7084 |
| 2 | 13.309 | MM    | 1.0916  | 5496.49707 | 83.92175 50.2916  |

### HPLC chromatogram of chiral 3ck

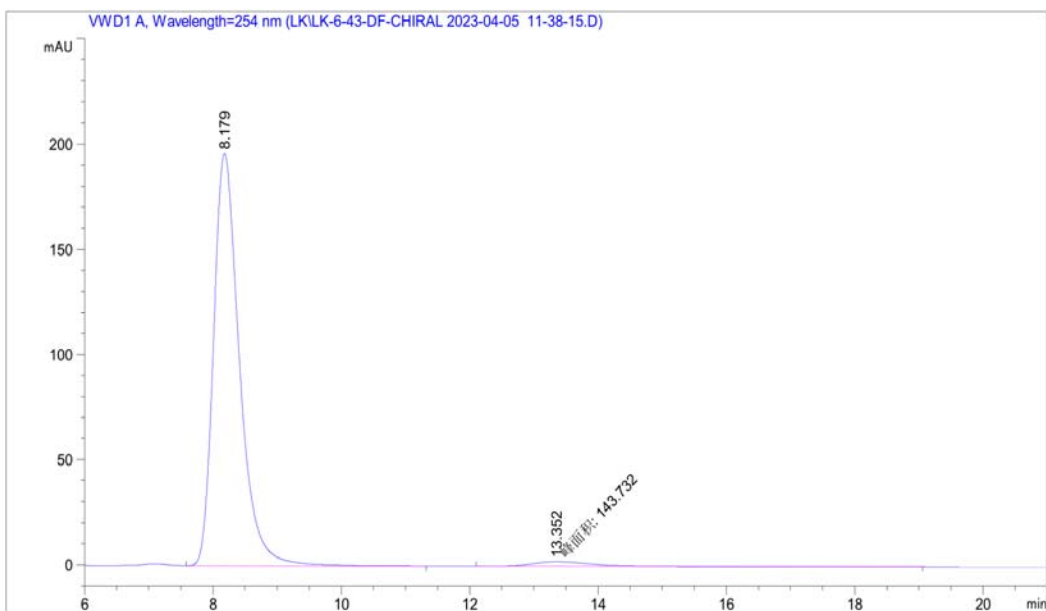

| # | [min]  | [min] | [mAU*s] | [mAU]      | %                 |
|---|--------|-------|---------|------------|-------------------|
| 1 | 8.179  | BB    | 0.4256  | 5483.38770 | 195.90038 97.4457 |
| 2 | 13.352 | MM    | 1.0651  | 143.73236  | 2.24916 2.5543    |

### HPLC chromatogram of racemic 3dk

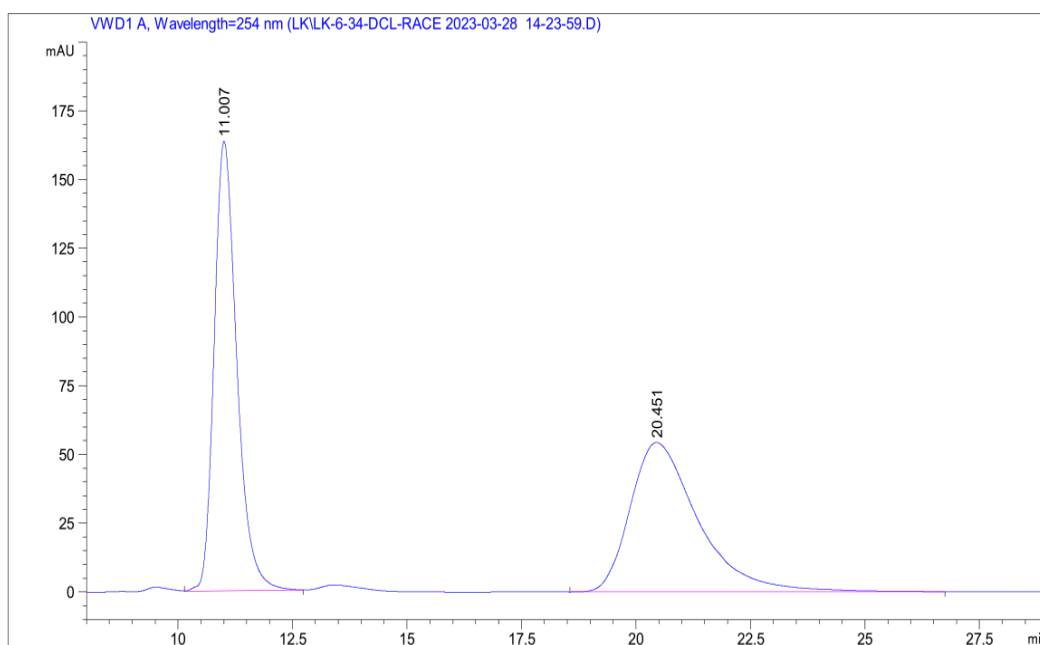

| # | [min]  | [min] | [mAU*s] | [mAU]      | %         |         |
|---|--------|-------|---------|------------|-----------|---------|
| 1 | 11.007 | VB    | 0.5286  | 5609.83008 | 163.39287 | 49.9915 |
| 2 | 20.451 | BB    | 1.5477  | 5611.73193 | 54.34380  | 50.0085 |

### HPLC chromatogram of chiral 3dk

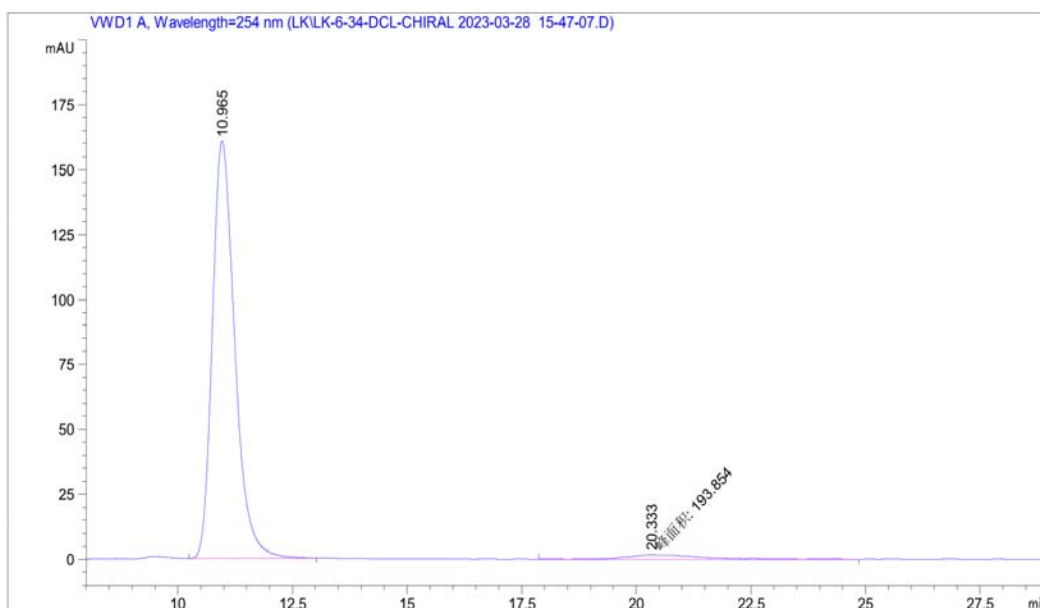

| # | [min]  | [min] | [mAU*s] | [mAU]      | %         |         |
|---|--------|-------|---------|------------|-----------|---------|
| 1 | 10.965 | BB    | 0.5305  | 5446.04297 | 160.64973 | 96.5628 |
| 2 | 20.333 | MM    | 1.9043  | 193.85396  | 1.69664   | 3.4372  |

### HPLC chromatogram of racemic 3ek

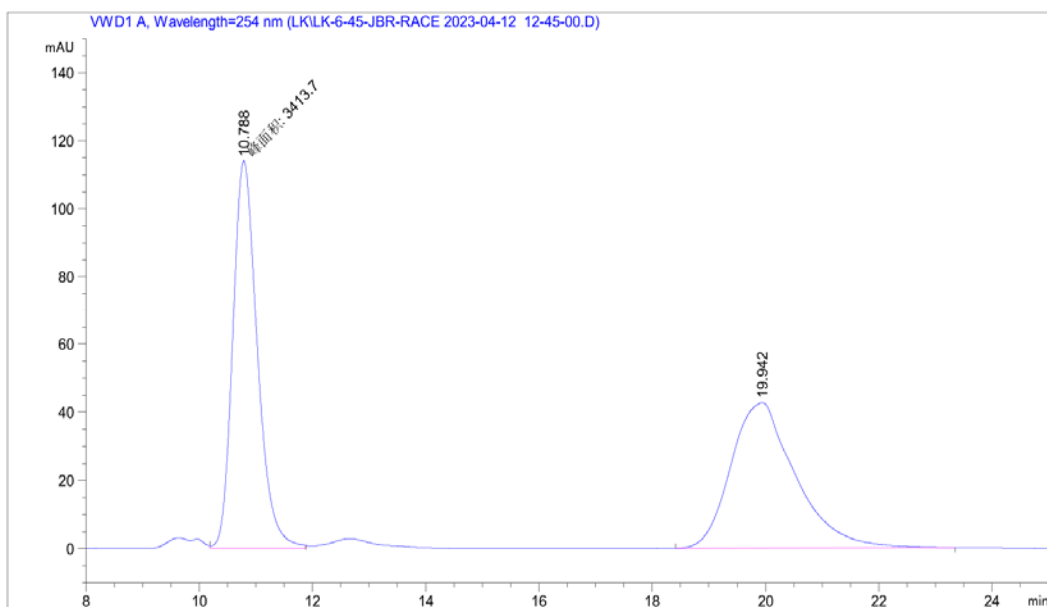

| # | [min]  | [min] | [mAU*s] | [mAU]      | %         |         |
|---|--------|-------|---------|------------|-----------|---------|
| 1 | 10.788 | MM    | 0.4998  | 3413.69653 | 113.83076 | 50.3019 |
| 2 | 19.942 | BB    | 1.1453  | 3372.72339 | 42.66145  | 49.6981 |

### HPLC chromatogram of chiral 3ek

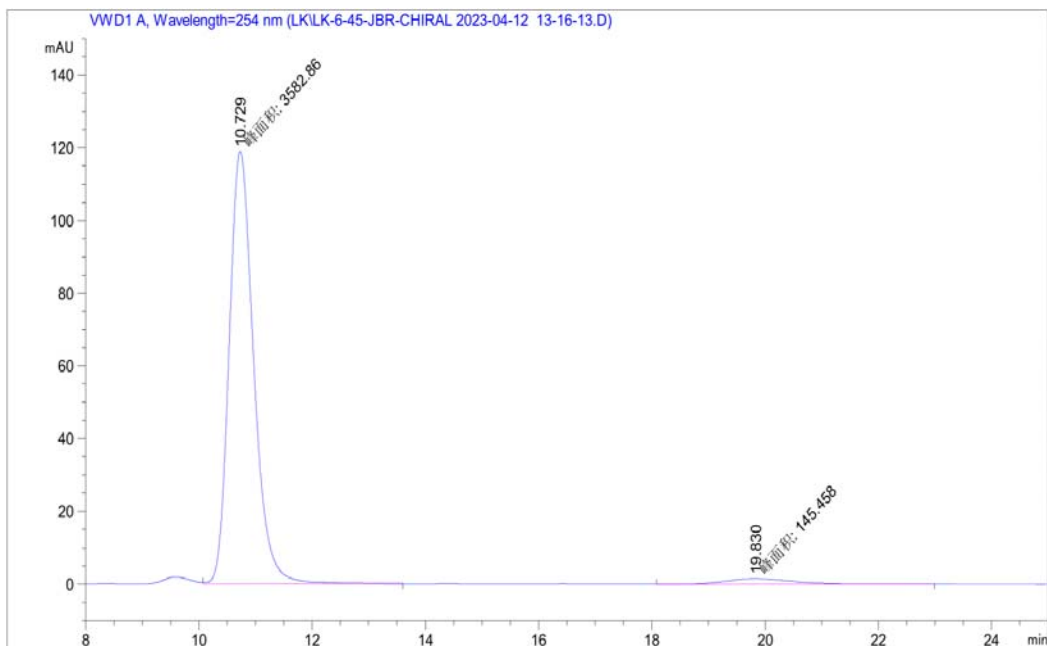

| # | [min]  | [min] | [mAU*s] | [mAU]      | %         |         |
|---|--------|-------|---------|------------|-----------|---------|
| 1 | 10.729 | MM    | 0.5017  | 3582.85718 | 119.01801 | 96.0986 |
| 2 | 19.830 | MM    | 1.5088  | 145.45807  | 1.60682   | 3.9014  |

### HPLC chromatogram of racemic 3fk

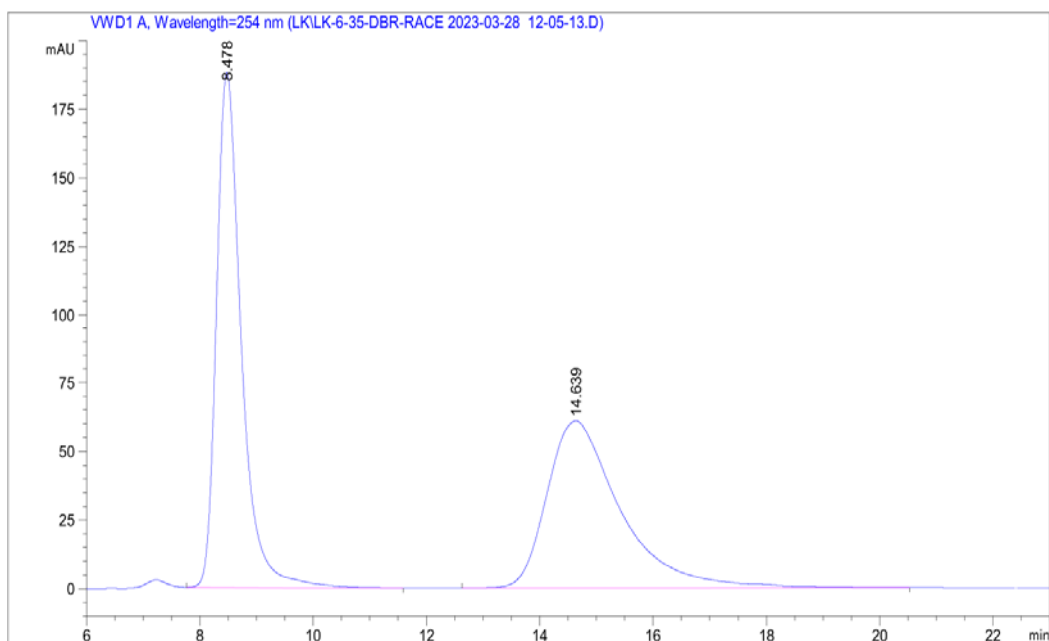

| # | [min]  | [min] | [mAU*s] | [mAU]      | %         |         |
|---|--------|-------|---------|------------|-----------|---------|
| 1 | 8.478  | BB    | 0.4611  | 5719.58301 | 187.92531 | 50.9621 |
| 2 | 14.639 | BB    | 1.3469  | 5503.62598 | 60.86916  | 49.0379 |

### HPLC chromatogram of chiral 3fk

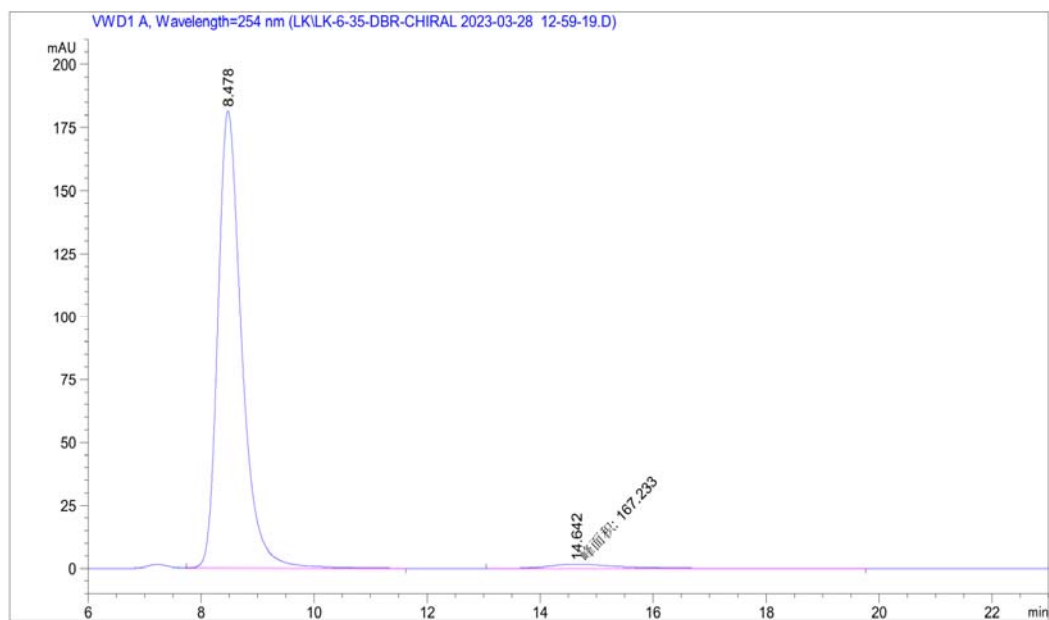

| # | [min]  | [min] | [mAU*s] | [mAU]      | %         |         |
|---|--------|-------|---------|------------|-----------|---------|
| 1 | 8.478  | BB    | 0.4430  | 5302.33740 | 181.41003 | 96.9425 |
| 2 | 14.642 | MM    | 1.6444  | 167.23271  | 1.69495   | 3.0575  |

### HPLC chromatogram of racemic 3gk

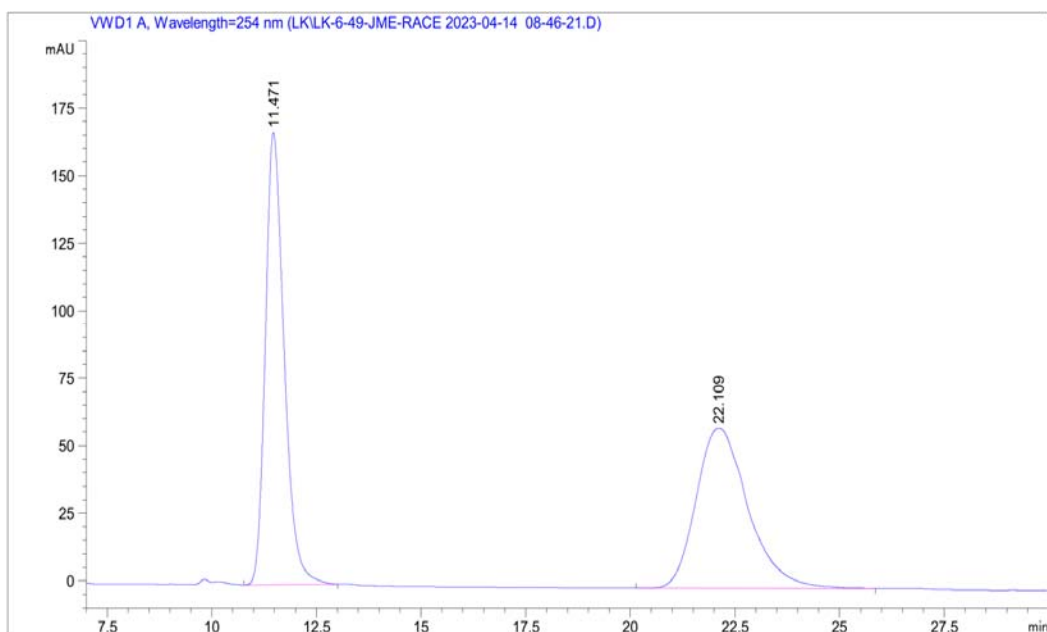

| # | [min]  | [min] | [mAU*s] | [mAU]      | %                 |
|---|--------|-------|---------|------------|-------------------|
| 1 | 11.471 | BB    | 0.4743  | 5212.81299 | 167.41412 50.5598 |
| 2 | 22.109 | BB    | 1.2437  | 5097.38672 | 59.19217 49.4402  |

### HPLC chromatogram of chiral 3gk

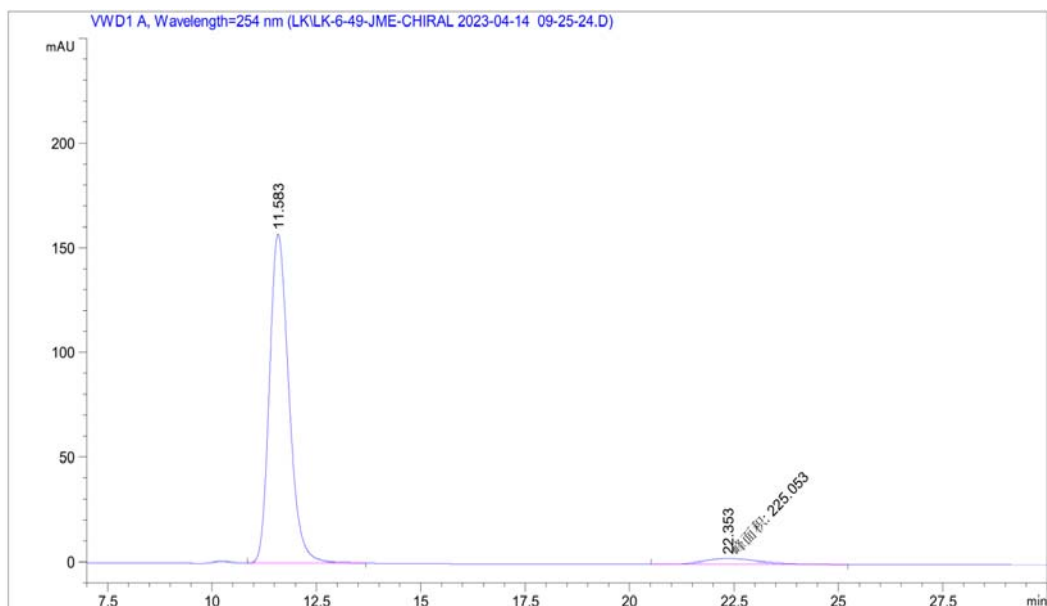

| # | [min]  | [min] | [mAU*s] | [mAU]      | %                 |
|---|--------|-------|---------|------------|-------------------|
| 1 | 11.583 | BB    | 0.4971  | 5056.63574 | 157.28792 95.7390 |
| 2 | 22.353 | MM    | 1.4611  | 225.05284  | 2.56723 4.2610    |



### HPLC chromatogram of racemic 3hk

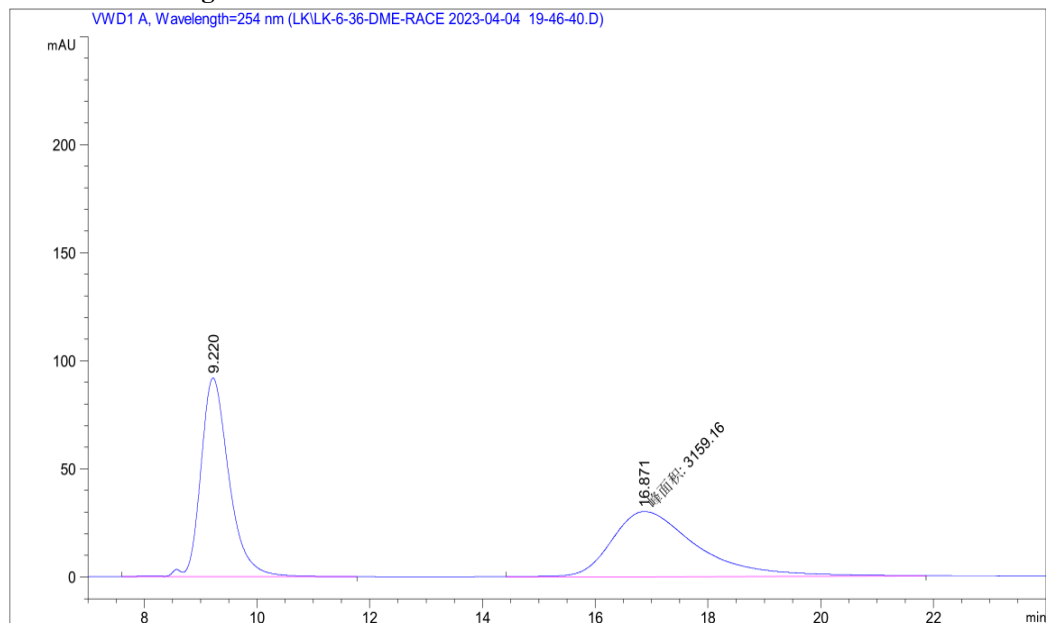

# [min] [min] [mAU\*s] [mAU] %

-----|-----|-----|-----|-----|-----|  
1 9.220 VB R 0.5262 3210.09717 91.95518 50.3999  
2 16.871 MM 1.7513 3159.15942 30.06450 49.6001

### HPLC chromatogram of chiral 3hk

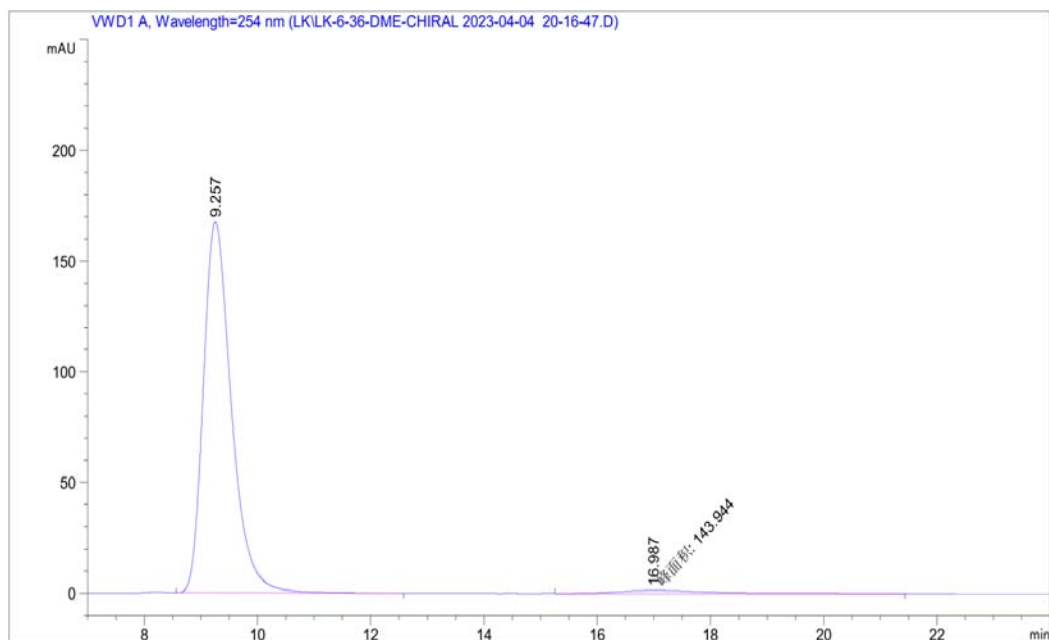

# [min] [min] [mAU\*s] [mAU] %

-----|-----|-----|-----|-----|-----|  
1 9.257 BB 0.5253 5769.11426 167.73515 97.5657  
2 16.987 MM 1.7027 143.94447 1.40902 2.4343

### HPLC chromatogram of racemic 3ik

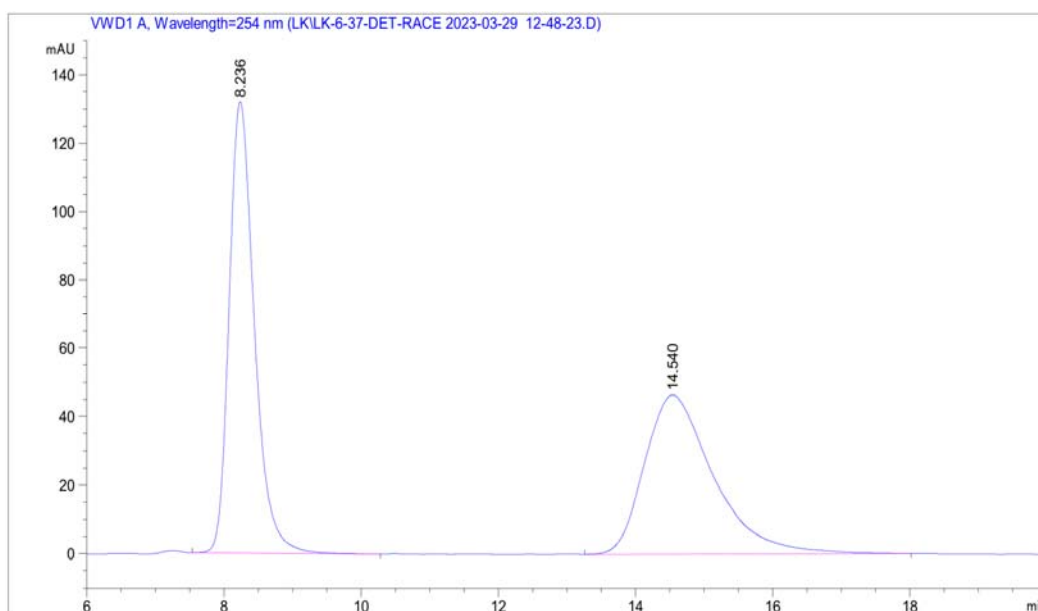

| # | [min]  | [min] | [mAU*s] | [mAU]      | %         |         |
|---|--------|-------|---------|------------|-----------|---------|
| 1 | 8.236  | BB    | 0.3913  | 3364.24756 | 132.01259 | 50.9355 |
| 2 | 14.540 | BB    | 1.0858  | 3240.67554 | 46.45826  | 49.0645 |

### HPLC chromatogram of chiral 3ik

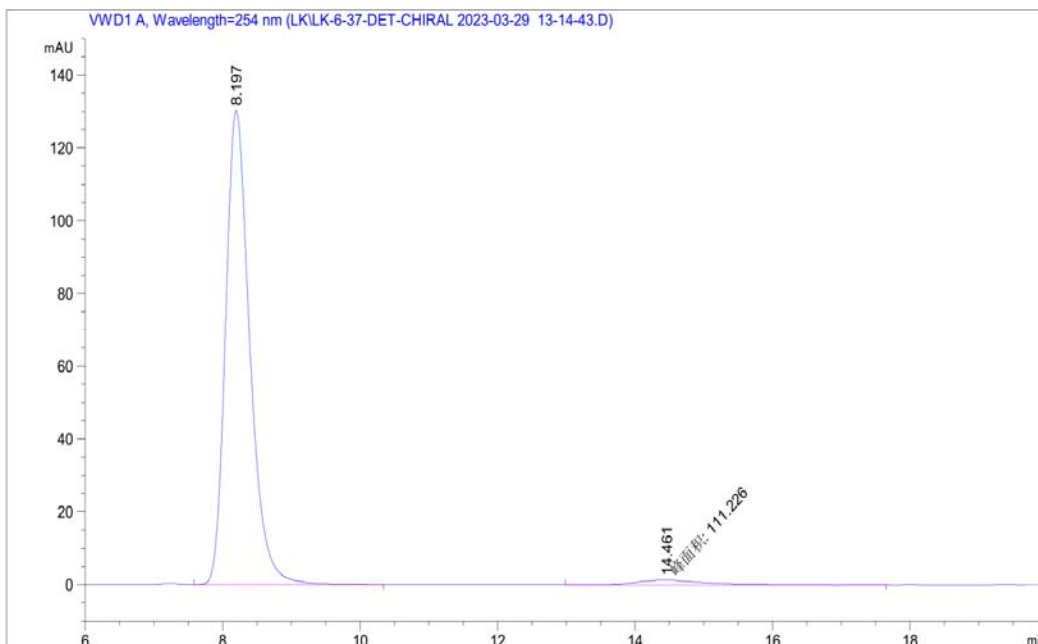

| # | [min]  | [min] | [mAU*s] | [mAU]      | %         |         |
|---|--------|-------|---------|------------|-----------|---------|
| 1 | 8.197  | BB    | 0.3720  | 3183.26367 | 130.29619 | 96.6239 |
| 2 | 14.461 | MM    | 1.3082  | 111.22626  | 1.41706   | 3.3761  |

### HPLC chromatogram of racemic 3jk

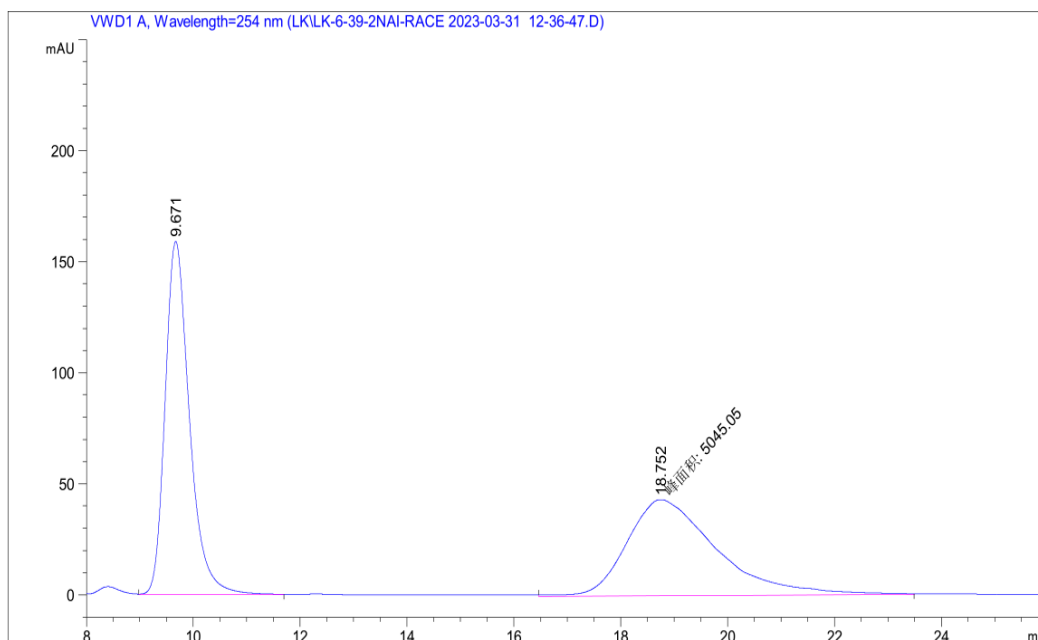

| # | [min]  | [min] | [mAU*s] | [mAU]      | %         |         |
|---|--------|-------|---------|------------|-----------|---------|
| 1 | 9.671  | BB    | 0.4800  | 5010.32422 | 158.83531 | 49.8273 |
| 2 | 18.752 | MM    | 1.9420  | 5045.04932 | 43.29730  | 50.1727 |

### HPLC chromatogram of chiral 3jk

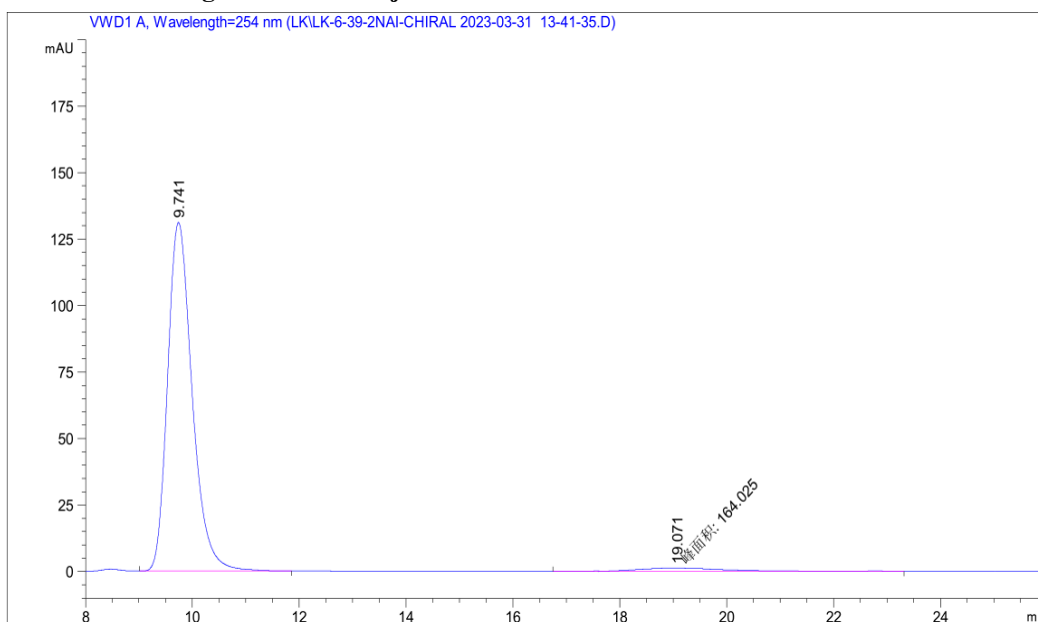

| # | [min]  | [min] | [mAU*s] | [mAU]      | %         |         |
|---|--------|-------|---------|------------|-----------|---------|
| 1 | 9.741  | BB    | 0.4881  | 4189.67822 | 131.02332 | 96.2325 |
| 2 | 19.071 | MM    | 2.0045  | 164.02548  | 1.36380   | 3.7675  |

### HPLC chromatogram of racemic 3kk

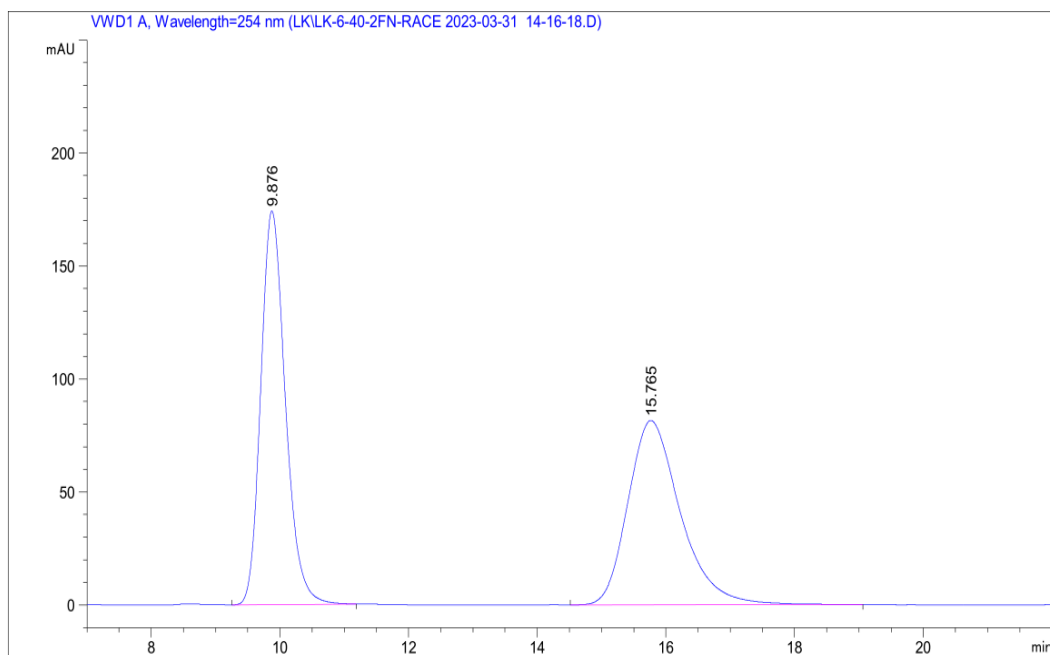

| # | [min]  | [min] | [mAU*s] | [mAU]      | %         |         |
|---|--------|-------|---------|------------|-----------|---------|
| 1 | 9.876  | BB    | 0.4076  | 4622.46143 | 174.20792 | 50.0131 |
| 2 | 15.765 | BB    | 0.8656  | 4620.04541 | 81.59460  | 49.9869 |

### HPLC chromatogram of chiral 3kk

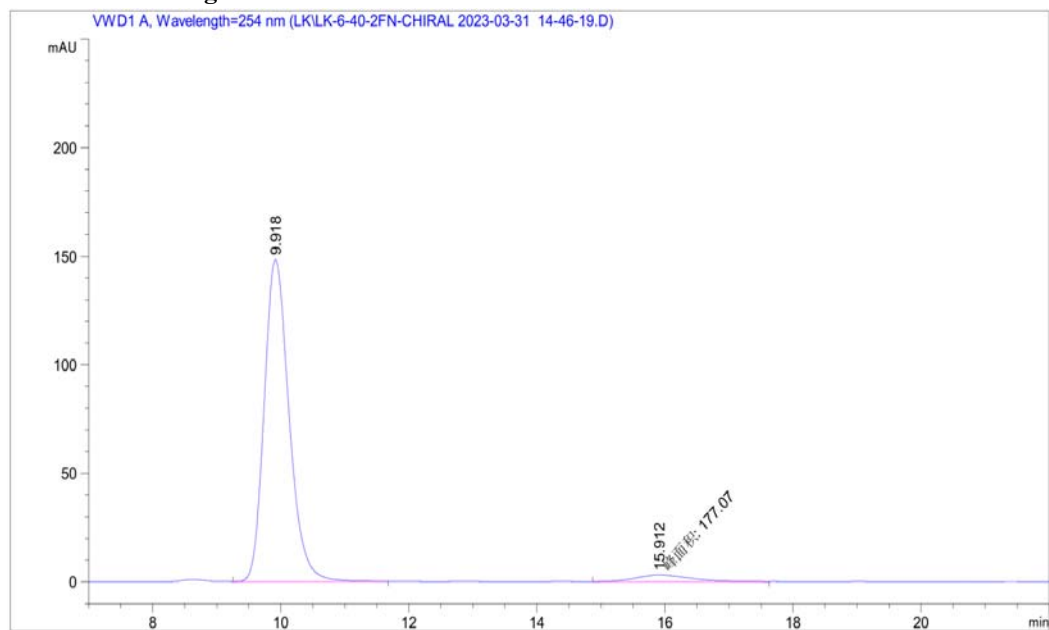

| # | [min]  | [min] | [mAU*s] | [mAU]      | %         |         |
|---|--------|-------|---------|------------|-----------|---------|
| 1 | 9.918  | BB    | 0.4166  | 4002.47998 | 148.41318 | 95.7634 |
| 2 | 15.912 | MM    | 0.9611  | 177.07050  | 3.07052   | 4.2366  |

### HPLC chromatogram of racemic 3lk

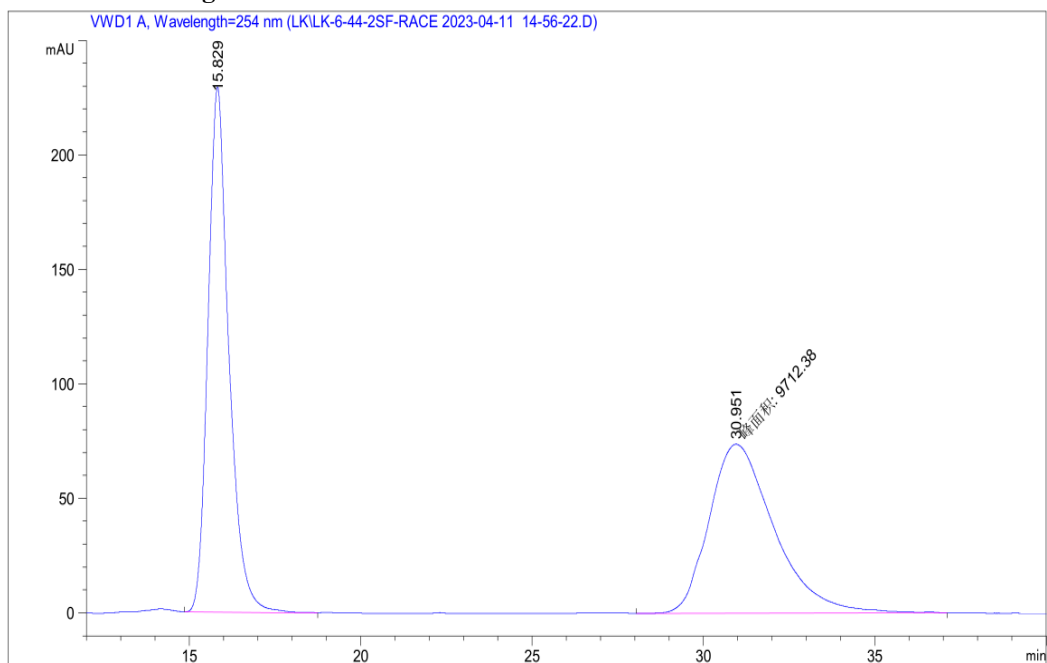

| # | [min]  | [min] | [mAU*s] | [mAU]      | %                 |
|---|--------|-------|---------|------------|-------------------|
| 1 | 15.829 | BB    | 0.6240  | 9713.27148 | 229.41214 50.0023 |
| 2 | 30.951 | MM    | 2.1948  | 9712.38281 | 73.75340 49.9977  |

### HPLC chromatogram of chiral 3lk

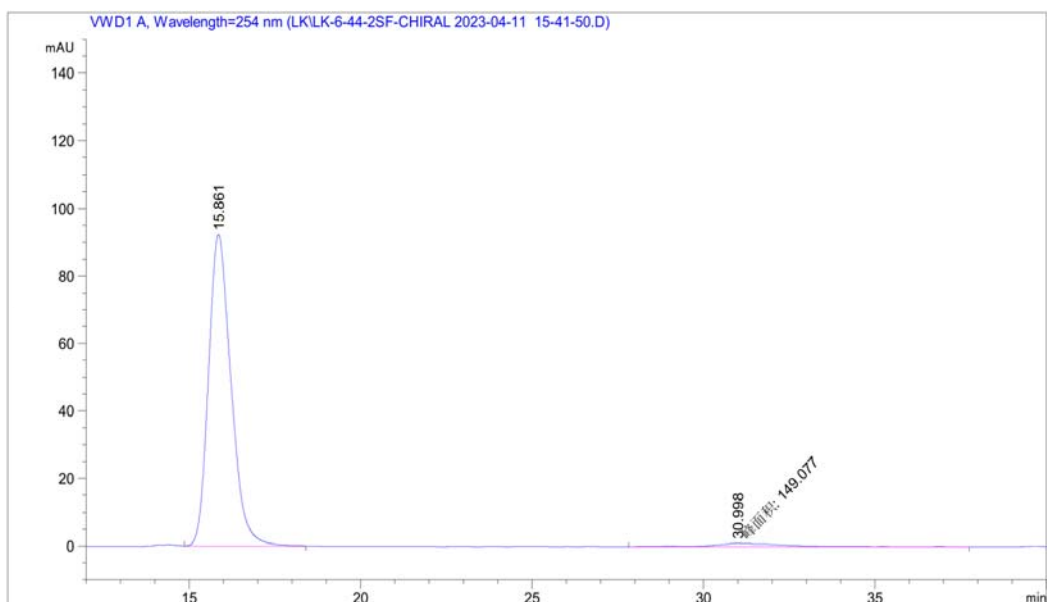

| # | [min]  | [min] | [mAU*s] | [mAU]      | %                |
|---|--------|-------|---------|------------|------------------|
| 1 | 15.861 | BB    | 0.6930  | 4191.94434 | 92.27579 96.5659 |
| 2 | 30.998 | MM    | 2.3644  | 149.07654  | 1.05085 3.4341   |

### HPLC chromatogram of racemic 3mk

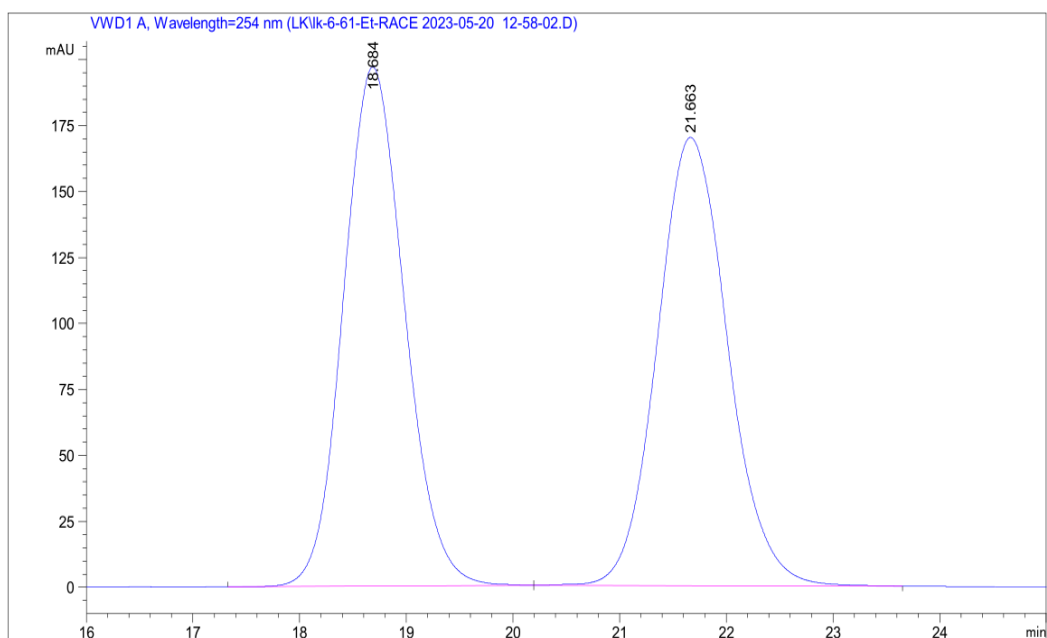

| # | [min]  | [min]     | [mAU*s]    | [mAU]     | %       |
|---|--------|-----------|------------|-----------|---------|
| 1 | 18.684 | BB 0.6280 | 7809.15723 | 196.77307 | 50.0142 |
| 2 | 21.663 | BB 0.7140 | 7804.70850 | 169.86447 | 49.9858 |

### HPLC chromatogram of chiral 3mk

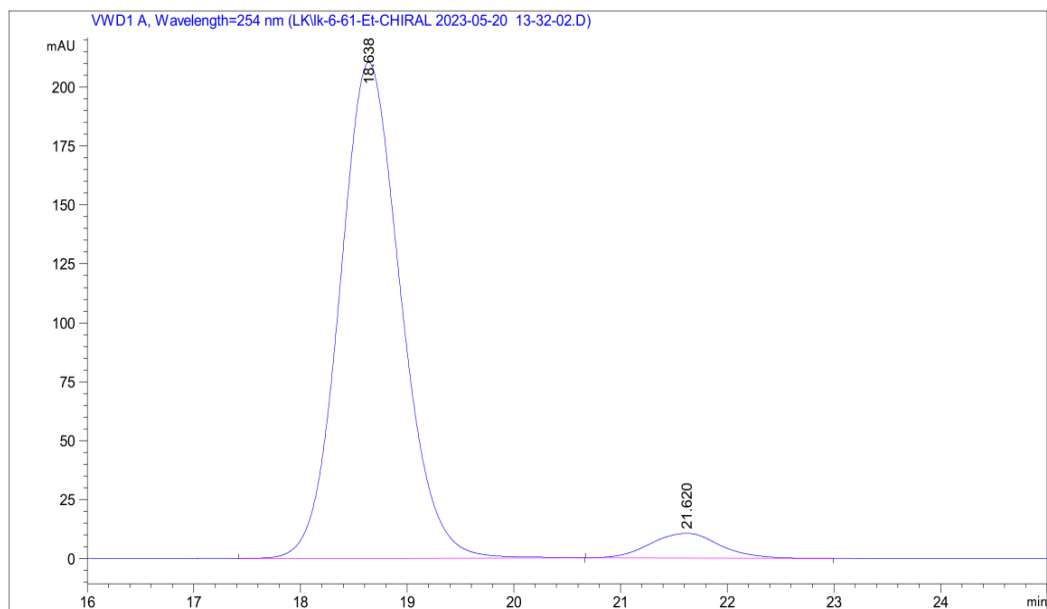

| # | [min]  | [min]     | [mAU*s]    | [mAU]     | %       |
|---|--------|-----------|------------|-----------|---------|
| 1 | 18.638 | BB 0.6120 | 8329.90234 | 210.34508 | 94.6101 |
| 2 | 21.620 | BB 0.7100 | 474.54932  | 10.46677  | 5.3899  |

### HPLC chromatogram of racemic 3nk

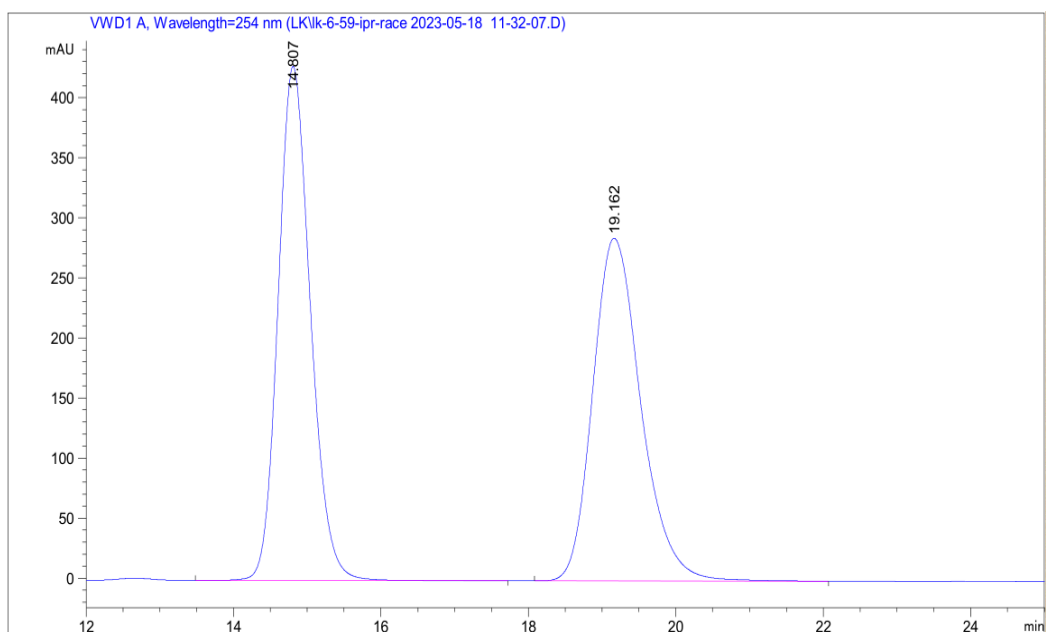

| # | [min]  | [min]     | [mAU*s]   | [mAU]     | %       |
|---|--------|-----------|-----------|-----------|---------|
| 1 | 14.807 | BB 0.4682 | 1.30333e4 | 428.05847 | 50.1462 |
| 2 | 19.162 | BB 0.6987 | 1.29573e4 | 285.40726 | 49.8538 |

### HPLC chromatogram of chiral 3nk

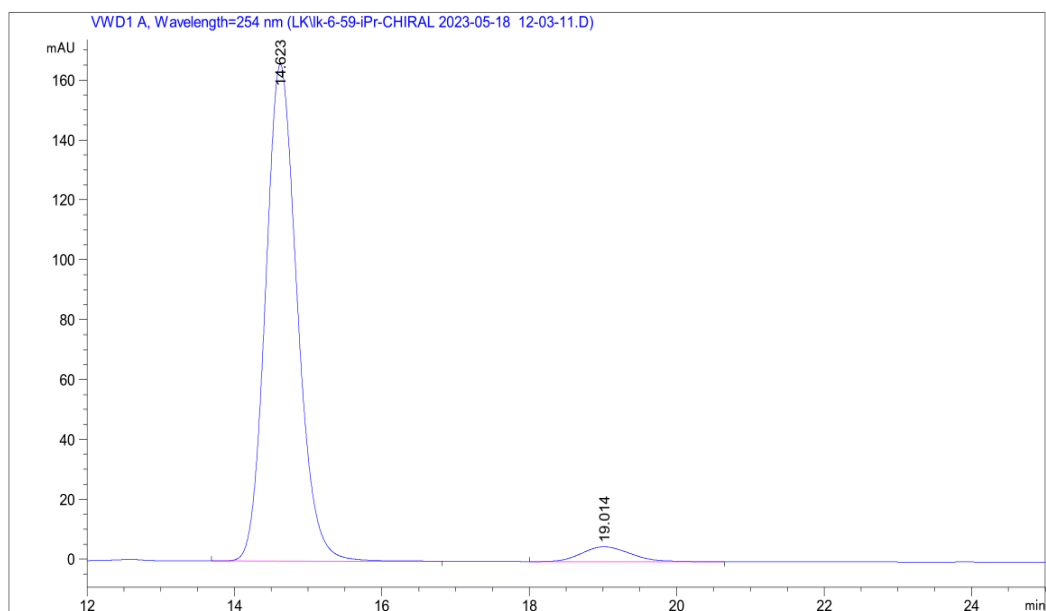

| # | [min]  | [min]     | [mAU*s]    | [mAU]     | %       |
|---|--------|-----------|------------|-----------|---------|
| 1 | 14.623 | BB 0.4579 | 4934.23291 | 165.93445 | 95.5535 |
| 2 | 19.014 | BB 0.7050 | 229.60878  | 4.98851   | 4.4465  |

### HPLC chromatogram of racemic 4a

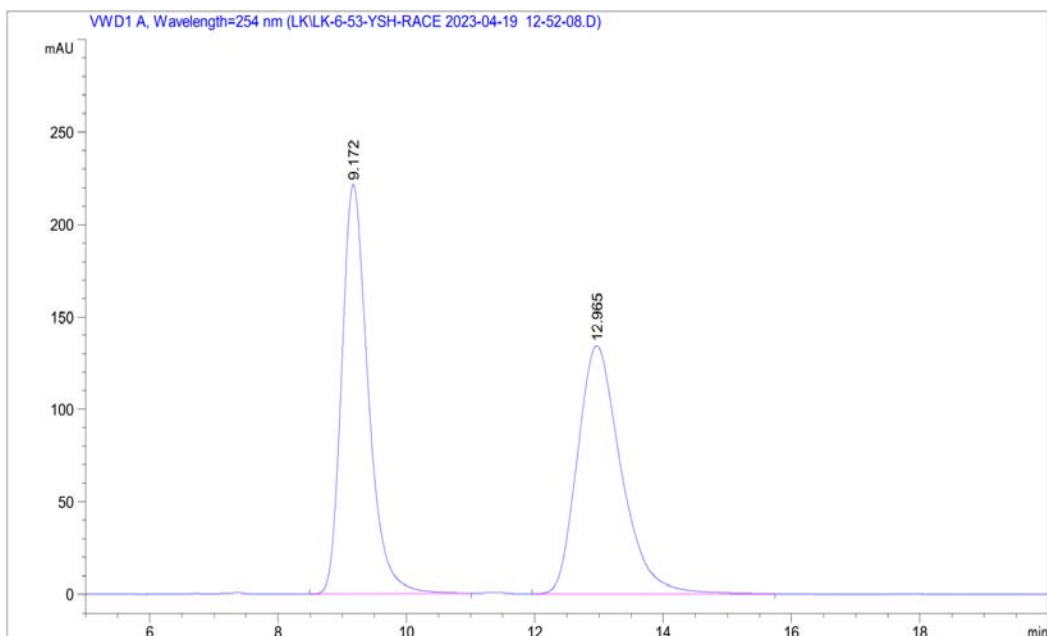

| # | [min]  | [min] | [mAU*s] | [mAU]      | %         |         |
|---|--------|-------|---------|------------|-----------|---------|
| 1 | 9.172  | BB    | 0.4359  | 6314.71191 | 221.30313 | 50.0226 |
| 2 | 12.965 | BB    | 0.7163  | 6309.00439 | 133.99446 | 49.9774 |

### HPLC chromatogram of chiral 4a

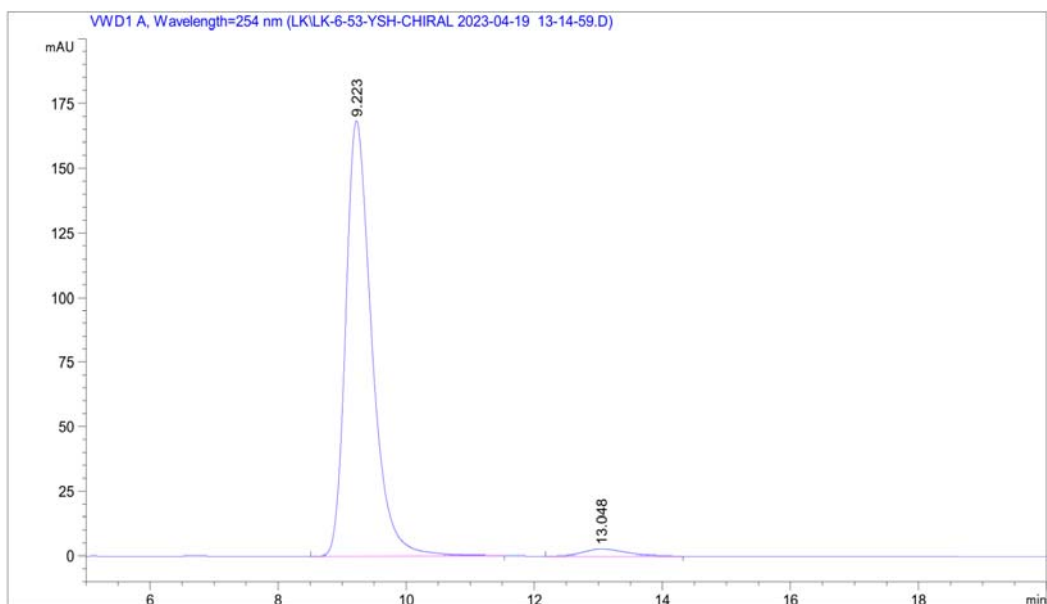

| # | [min]  | [min] | [mAU*s] | [mAU]      | %         |         |
|---|--------|-------|---------|------------|-----------|---------|
| 1 | 9.223  | BB    | 0.4277  | 4744.22412 | 168.40855 | 97.5717 |
| 2 | 13.048 | BB    | 0.6107  | 118.07159  | 2.68170   | 2.4283  |



### HPLC chromatogram of racemic 4b

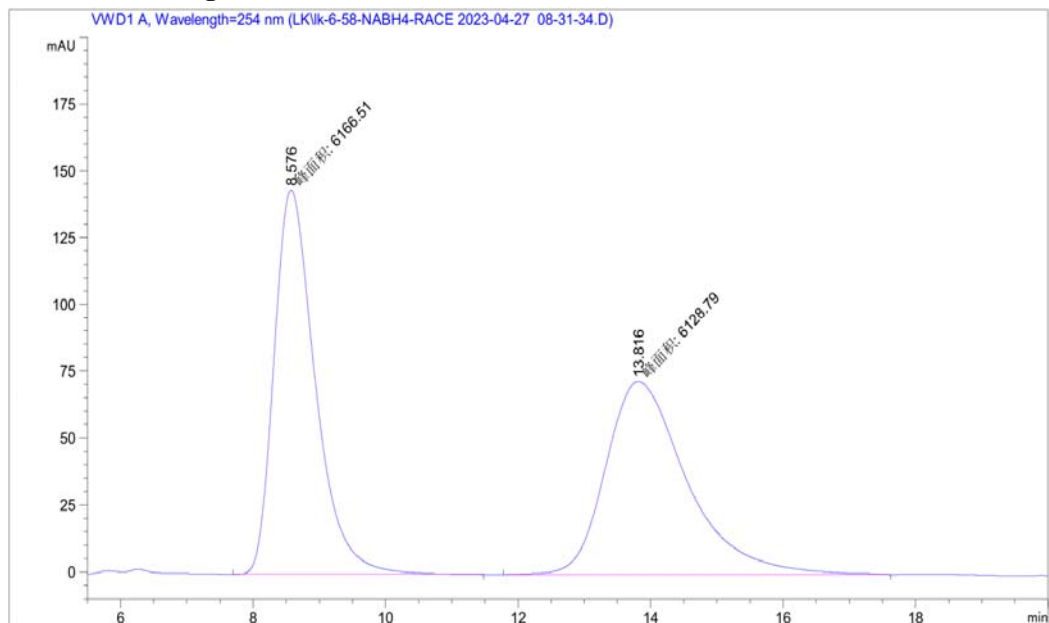

# [min] [min] [mAU\*s] [mAU] %

-----|-----|-----|-----|-----|-----|  
**1 8.576 MM 0.7162 6166.50586 143.50679 50.1534**  
**2 13.816 MM 1.4190 6128.79102 71.98298 49.8466**

### HPLC chromatogram of chiral 4b

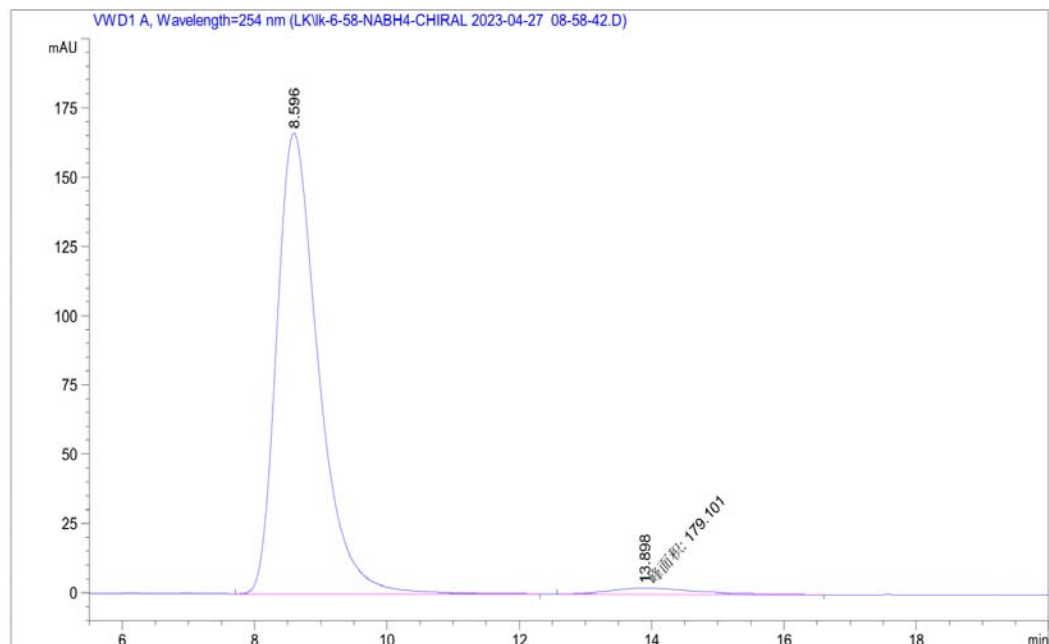

# [min] [min] [mAU\*s] [mAU] %

-----|-----|-----|-----|-----|-----|  
**1 8.596 BB 0.6616 7251.37842 166.34438 97.5896**  
**2 13.898 MM 1.3651 179.10065 2.18670 2.4104**

### HPLC chromatogram of racemic 4c

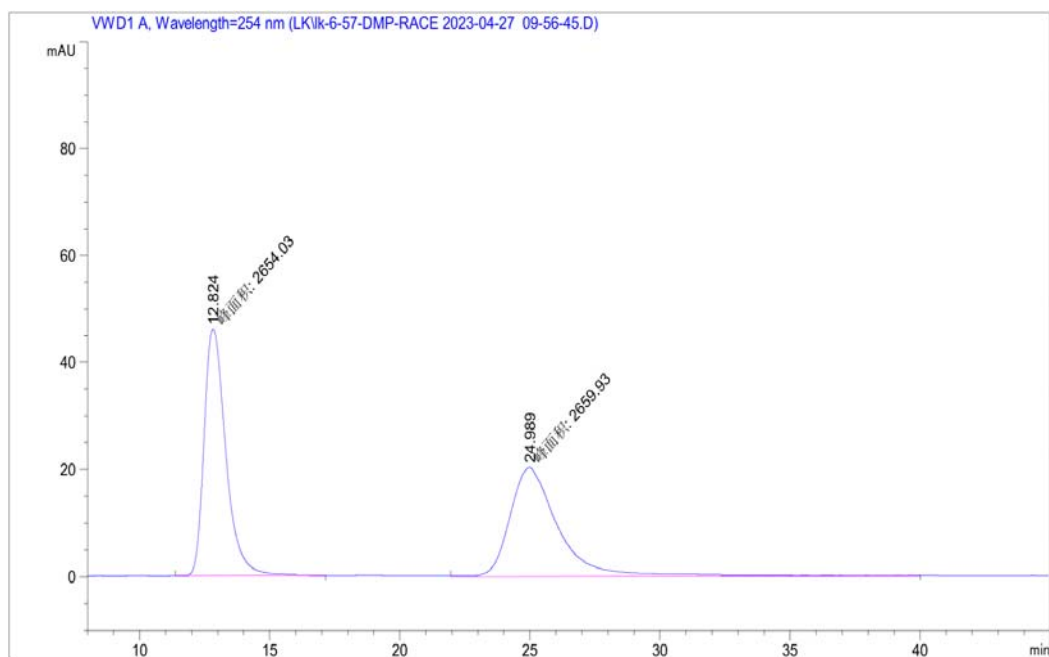

# [min] [min] [mAU\*s] [mAU] %

-----|-----|-----|-----|-----|-----|  
**1 12.824 MM 0.9628 2654.02905 45.94079 49.9445**  
**2 24.989 MM 2.1808 2659.92554 20.32876 50.0555**

### HPLC chromatogram of chiral 4c

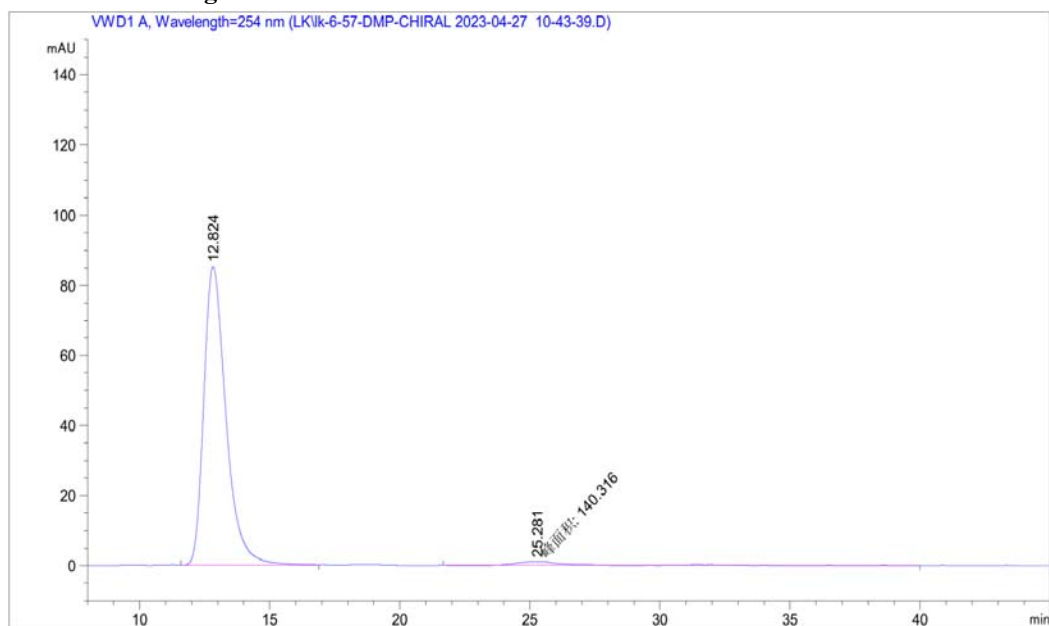

# [min] [min] [mAU\*s] [mAU] %

-----|-----|-----|-----|-----|-----|  
**1 12.824 BB 0.8990 5044.95654 85.30590 97.2940**  
**2 25.281 MM 2.2291 140.31554 1.04911 2.7060**

### X-Ray Crystallographic Data of 3ak

Crystallographic data for **3ak** have been deposited with the Cambridge Crystallographic Data Centre as deposition number 2259613. These data can be obtained free of charge via [www.ccdc.cam.ac.uk/data\\_request/cif](http://www.ccdc.cam.ac.uk/data_request/cif), or by emailing [data\\_request@ccdc.cam.ac.uk](mailto:data_request@ccdc.cam.ac.uk), or by contacting The Cambridge Crystallographic Data Centre, 12, Union Road, Cambridge CB2 1EZ, UK; fax: +44 1223 336033.

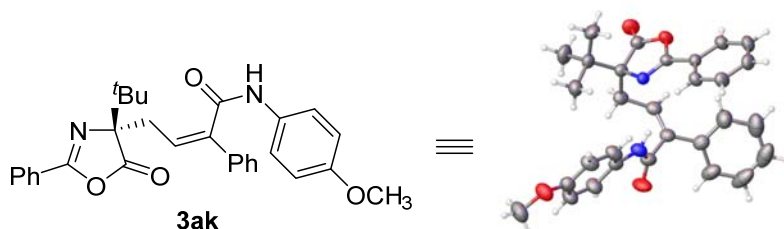

**Table S1. Crystal data and structure refinement for 3ak.**

|                                             |                                                                |
|---------------------------------------------|----------------------------------------------------------------|
| Identification code                         | <b>3ak</b>                                                     |
| Empirical formula                           | C <sub>30</sub> H <sub>30</sub> N <sub>2</sub> O <sub>4</sub>  |
| Formula weight                              | 482.56                                                         |
| Temperature/K                               | 193.00                                                         |
| Crystal system                              | monoclinic                                                     |
| Space group                                 | P2 <sub>1</sub>                                                |
| a/Å                                         | 10.4627(4)                                                     |
| b/Å                                         | 23.0018(10)                                                    |
| c/Å                                         | 10.8602(4)                                                     |
| α /°                                        | 90                                                             |
| β /°                                        | 93.636(2)                                                      |
| γ /°                                        | 90                                                             |
| Volume/Å <sup>3</sup>                       | 2608.36(18)                                                    |
| Z                                           | 4                                                              |
| ρ calcg/cm <sup>3</sup>                     | 1.229                                                          |
| μ /mm <sup>-1</sup>                         | 0.418                                                          |
| F(000)                                      | 1024.0                                                         |
| Crystal size/mm <sup>3</sup>                | 0.13 × 0.12 × 0.1                                              |
| Radiation                                   | GaKα (λ = 1.34139)                                             |
| 2θ range for data collection/°              | 6.686 to 120.48                                                |
| Index ranges                                | -12 ≤ h ≤ 13, -29 ≤ k ≤ 28, -14 ≤ l ≤ 13                       |
| Reflections collected                       | 45119                                                          |
| Independent reflections                     | 11509 [R <sub>int</sub> = 0.0496, R <sub>sigma</sub> = 0.0444] |
| Data/restraints/parameters                  | 11509/1/658                                                    |
| Goodness-of-fit on F <sup>2</sup>           | 1.049                                                          |
| Final R indexes [I >= 2σ (I)]               | R <sub>1</sub> = 0.0400, wR <sub>2</sub> = 0.0779              |
| Final R indexes [all data]                  | R <sub>1</sub> = 0.0639, wR <sub>2</sub> = 0.0875              |
| Largest diff. peak/hole / e Å <sup>-3</sup> | 0.14/-0.14                                                     |
| Flack parameter                             | -0.12(9)                                                       |

**Table S2. Fractional Atomic Coordinates ( $\times 10^4$ ) and Equivalent Isotropic Displacement Parameters ( $\text{\AA}^2 \times 10^3$ ) for 3ak.  $U_{\text{eq}}$  is defined as 1/3 of the trace of the orthogonalised  $U_{ij}$  tensor.**

| Atom | x          | y          | z          | $U_{\text{eq}}$ |
|------|------------|------------|------------|-----------------|
| O5   | 2470.5(19) | 3486.1(8)  | 2848.2(15) | 44.3(5)         |
| O2   | 9501.1(17) | 6877.1(8)  | 7845.9(15) | 40.1(4)         |
| N1   | 9009.5(18) | 5935.6(9)  | 7438.1(17) | 31.7(4)         |
| O3   | 4771.2(19) | 5145.2(9)  | 7761(2)    | 61.8(6)         |
| O1   | 9610(2)    | 6907.8(9)  | 9914.1(17) | 52.8(5)         |
| N3   | 3114.6(19) | 4405.0(9)  | 2487.3(17) | 33.3(5)         |
| O4   | 8323(2)    | 2815.9(9)  | 7001(2)    | 60.7(6)         |
| O6   | 2517(2)    | 3453.3(9)  | 4919.7(18) | 61.2(6)         |
| N2   | 6749(2)    | 5125.1(10) | 7011(2)    | 42.6(5)         |
| N4   | 5364(2)    | 5202.1(9)  | 2309(2)    | 41.4(5)         |
| O7   | 7407.8(19) | 5201.0(9)  | 3149(2)    | 74.5(7)         |
| O8   | 4997(2)    | 7497.0(9)  | 674(2)     | 63.5(6)         |
| C7   | 9225(2)    | 6432.7(11) | 6999(2)    | 32.2(5)         |
| C8   | 9196(2)    | 6600.1(10) | 5702(2)    | 32.5(5)         |
| C24  | 7019(2)    | 4519.7(11) | 6972(2)    | 38.5(6)         |
| C35  | 3037(2)    | 4361.7(11) | 3837(2)    | 35.8(6)         |
| C6   | 9436(3)    | 6624.3(12) | 8995(2)    | 39.0(6)         |
| C23  | 5746(3)    | 5392.8(12) | 7470(3)    | 44.7(7)         |
| C37  | 2786(2)    | 3920.1(11) | 2027(2)    | 34.2(6)         |
| C14  | 7718(2)    | 5905.2(12) | 9258(2)    | 41.0(6)         |
| C36  | 2652(3)    | 3735.1(13) | 4011(2)    | 43.3(6)         |
| C38  | 2688(2)    | 3757.3(11) | 720(2)     | 36.0(6)         |
| C15  | 6764(2)    | 6249.7(12) | 8477(2)    | 41.0(6)         |
| C46  | 6263(2)    | 4309.8(12) | 3156(2)    | 40.8(6)         |
| C5   | 9085(2)    | 5988.4(11) | 8792(2)    | 34.1(6)         |
| C45  | 5379(3)    | 4112.9(13) | 3889(2)    | 42.4(6)         |
| C54  | 5275(2)    | 5791.1(11) | 1897(2)    | 38.0(6)         |
| C44  | 4379(3)    | 4458.6(13) | 4487(2)    | 44.2(7)         |
| C53  | 6402(3)    | 4947.7(11) | 2885(3)    | 45.1(7)         |
| C9   | 9093(2)    | 6166.6(11) | 4812(2)    | 38.2(6)         |
| C32  | 1976(3)    | 4787.3(12) | 4258(2)    | 41.0(6)         |
| C16  | 5914(2)    | 6039.6(11) | 7628(2)    | 40.2(6)         |
| C57  | 5049(3)    | 6922.9(12) | 1023(3)    | 46.2(7)         |
| C55  | 4623(3)    | 5908.9(12) | 791(3)     | 45.3(7)         |

|     |          |            |          |          |
|-----|----------|------------|----------|----------|
| C13 | 9227(3)  | 7180.3(12) | 5346(2)  | 41.7(6)  |
| C39 | 3147(3)  | 4132.4(12) | -144(2)  | 40.8(6)  |
| C2  | 10127(3) | 5567.0(12) | 9368(2)  | 40.7(6)  |
| C56 | 4489(3)  | 6473.2(13) | 350(2)   | 44.9(7)  |
| C12 | 9193(3)  | 7317.5(13) | 4106(3)  | 48.3(7)  |
| C33 | 680(3)   | 4601.0(14) | 3668(3)  | 48.6(7)  |
| C47 | 7188(3)  | 3926.1(11) | 2572(3)  | 41.0(6)  |
| C11 | 9126(3)  | 6884.8(14) | 3231(2)  | 48.0(7)  |
| C25 | 8000(3)  | 4341.4(13) | 6262(3)  | 48.3(7)  |
| C29 | 6411(3)  | 4113.0(13) | 7662(3)  | 50.8(7)  |
| C10 | 9064(3)  | 6309.7(13) | 3583(2)  | 44.9(7)  |
| C4  | 9835(3)  | 4942.2(12) | 8941(3)  | 51.1(7)  |
| C27 | 7825(3)  | 3368.3(12) | 7018(3)  | 46.3(7)  |
| C28 | 6812(3)  | 3533.9(13) | 7679(3)  | 53.5(8)  |
| C31 | 2276(3)  | 5402.9(12) | 3841(3)  | 48.1(7)  |
| C52 | 7667(3)  | 4071.6(13) | 1452(3)  | 55.1(8)  |
| C26 | 8410(3)  | 3771.5(13) | 6294(3)  | 51.3(7)  |
| C48 | 7576(3)  | 3398.5(13) | 3105(3)  | 51.1(7)  |
| C58 | 5704(3)  | 6809.0(13) | 2144(3)  | 57.4(8)  |
| C59 | 5812(3)  | 6246.5(12) | 2583(3)  | 51.4(7)  |
| C1  | 11426(3) | 5743.1(14) | 8924(3)  | 54.7(8)  |
| C49 | 8376(3)  | 3028.9(14) | 2517(3)  | 58.5(8)  |
| C50 | 8833(3)  | 3179.1(14) | 1408(3)  | 60.0(9)  |
| C40 | 3033(3)  | 3997.8(13) | -1382(2) | 46.5(7)  |
| C51 | 8478(3)  | 3700.7(14) | 872(3)   | 63.8(9)  |
| C43 | 2120(3)  | 3242.2(13) | 337(3)   | 55.8(8)  |
| C34 | 1920(3)  | 4777.2(15) | 5665(2)  | 56.7(8)  |
| C22 | 5576(3)  | 6905.9(15) | 6275(3)  | 59.1(8)  |
| C17 | 5071(3)  | 6421.9(13) | 6833(3)  | 45.6(7)  |
| C18 | 3772(3)  | 6309.6(15) | 6610(3)  | 60.2(8)  |
| C41 | 2454(3)  | 3487.8(15) | -1756(3) | 62.7(9)  |
| C3  | 10169(3) | 5588.1(15) | 10779(2) | 62.2(9)  |
| C19 | 3017(4)  | 6671.7(19) | 5862(4)  | 82.3(13) |
| C21 | 4810(4)  | 7269.9(17) | 5529(3)  | 78.3(11) |
| C20 | 3524(5)  | 7147.9(19) | 5323(4)  | 85.4(13) |
| C30 | 7818(4)  | 2397.9(15) | 7809(3)  | 73.4(10) |
| C60 | 4431(4)  | 7632.2(15) | -520(3)  | 73.0(10) |
| C42 | 2002(4)  | 3110.5(16) | -904(3)  | 77.5(12) |

**Table S3. Anisotropic Displacement Parameters ( $\text{\AA}^2 \times 10^3$ ) for 3ak. The Anisotropic displacement factor exponent takes the form:  $-2 \pi^2 [h^2 a^{*2} U_{11} + 2hka^* b^* U_{12} + \dots]$ .**

| Atom | U11      | U22      | U33      | U23      | U13       | U12      |
|------|----------|----------|----------|----------|-----------|----------|
| O5   | 60.5(13) | 39.4(11) | 33.2(10) | 2.4(8)   | 5.9(8)    | -9.3(9)  |
| O2   | 52.7(11) | 33.8(10) | 33.9(9)  | -3.5(8)  | 3.4(8)    | -8.2(9)  |
| N1   | 32.3(11) | 34.2(12) | 28.8(10) | 1.5(9)   | 2.6(8)    | -2.1(9)  |
| O3   | 36.3(11) | 50.9(13) | 99.8(17) | 3.3(12)  | 15.1(11)  | -7.3(10) |
| O1   | 69.3(14) | 52.7(12) | 36.4(10) | -12.2(9) | 2.8(9)    | -9.9(11) |
| N3   | 34.2(12) | 37.1(12) | 28.5(10) | 0.2(9)   | 1.0(8)    | -2.5(9)  |
| O4   | 64.2(14) | 42.9(12) | 77.0(15) | 3.0(11)  | 20.7(11)  | 4.1(10)  |
| O6   | 88.6(17) | 56.4(13) | 38.6(11) | 13.2(10) | 5.5(10)   | -9.0(12) |
| N2   | 40.7(13) | 39.9(13) | 48.3(13) | -3.4(10) | 11.8(10)  | -5.7(10) |
| N4   | 36.2(12) | 35.3(12) | 52.2(13) | 0.6(10)  | -1.5(10)  | -3.6(10) |
| O7   | 38.2(12) | 38.0(12) | 144(2)   | -3.2(13) | -16.7(13) | -1.3(10) |
| O8   | 66.7(15) | 39.0(12) | 83.9(16) | 9.4(11)  | -1.1(12)  | 6.4(10)  |
| C7   | 30.2(13) | 33.2(14) | 33.4(13) | -2.5(11) | 3.6(10)   | -3.5(11) |
| C8   | 32.5(13) | 32.9(14) | 32.2(13) | 1.9(10)  | 3.3(10)   | -0.2(10) |
| C24  | 37.5(14) | 39.7(16) | 38.3(14) | -4.1(12) | 2.0(11)   | -4.8(12) |
| C35  | 41.5(15) | 39.7(14) | 26.0(12) | 0.6(10)  | -0.5(10)  | -1.0(12) |
| C6   | 39.3(15) | 43.1(16) | 34.7(14) | -2.5(12) | 3.6(11)   | -3.8(12) |
| C23  | 37.5(16) | 46.0(17) | 50.9(16) | -2.5(13) | 4.8(13)   | -5.5(13) |
| C37  | 33.1(14) | 36.5(15) | 33.5(13) | 2.0(11)  | 4.4(10)   | -3.3(11) |
| C14  | 41.3(15) | 47.9(16) | 34.7(13) | -1.7(12) | 9.5(11)   | -2.5(12) |
| C36  | 49.1(17) | 46.7(16) | 34.1(15) | 3.3(13)  | 3.2(12)   | -3.7(13) |
| C38  | 36.3(14) | 37.8(15) | 34.1(13) | -2.4(11) | 4.1(11)   | -2.9(11) |
| C15  | 37.0(15) | 41.1(15) | 46.1(15) | -3.5(12) | 11.7(12)  | -0.7(12) |
| C46  | 34.2(15) | 36.8(15) | 50.4(16) | 0.2(12)  | -5.6(12)  | 2.5(11)  |
| C5   | 35.4(14) | 39.5(14) | 27.5(12) | -0.5(11) | 3.8(10)   | -2.7(11) |
| C45  | 39.9(15) | 43.2(15) | 42.9(15) | 0.4(12)  | -6.3(12)  | 3.9(13)  |
| C54  | 30.1(14) | 37.0(15) | 47.2(15) | -1.2(12) | 4.5(11)   | -0.7(11) |
| C44  | 43.3(16) | 53.6(18) | 34.9(14) | -1.7(12) | -3.7(11)  | 3.0(13)  |
| C53  | 32.9(15) | 35.2(15) | 66.9(19) | -5.1(13) | 0.4(13)   | -1.0(12) |
| C9   | 44.4(16) | 34.7(14) | 36.0(14) | 0.8(11)  | 7.7(11)   | -1.0(11) |
| C32  | 40.0(15) | 51.6(17) | 31.4(13) | -4.8(12) | 2.9(11)   | 1.7(12)  |
| C16  | 32.5(14) | 42.2(16) | 46.7(15) | -2.5(12) | 9.7(12)   | -1.3(12) |
| C57  | 43.0(16) | 35.8(15) | 60.2(18) | 4.7(14)  | 6.9(14)   | 7.0(13)  |
| C55  | 42.4(16) | 42.6(17) | 50.4(17) | -2.1(13) | -0.9(13)  | -6.6(13) |
| C13  | 47.4(17) | 33.9(15) | 43.9(15) | 2.4(12)  | 4.8(12)   | -2.9(12) |

|     |          |          |          |           |           |           |
|-----|----------|----------|----------|-----------|-----------|-----------|
| C39 | 42.2(15) | 42.5(15) | 37.5(14) | -2.0(12)  | 1.6(11)   | -6.3(12)  |
| C2  | 43.6(16) | 44.8(16) | 33.0(14) | 4.0(12)   | -2.4(12)  | 0.6(12)   |
| C56 | 42.9(16) | 48.3(17) | 43.4(15) | 3.4(13)   | 2.5(12)   | 1.1(13)   |
| C12 | 57.4(18) | 39.8(16) | 48.0(17) | 12.9(14)  | 4.6(14)   | -0.6(14)  |
| C33 | 39.5(16) | 62.2(19) | 44.2(16) | -0.7(14)  | 3.1(12)   | 0.6(14)   |
| C47 | 33.2(14) | 36.4(15) | 52.9(16) | 0.7(12)   | -1.6(12)  | -3.3(11)  |
| C11 | 52.1(18) | 56.4(18) | 35.5(15) | 11.5(14)  | 3.7(12)   | 0.7(15)   |
| C25 | 56.8(18) | 44.5(17) | 45.3(16) | -3.1(13)  | 17.2(13)  | -7.8(14)  |
| C29 | 46.7(17) | 49.7(18) | 57.7(18) | 5.4(14)   | 16.6(14)  | -0.6(14)  |
| C10 | 54.4(18) | 47.2(18) | 33.5(14) | -0.1(13)  | 7.0(12)   | -4.3(13)  |
| C4  | 54.1(18) | 46.8(18) | 52.0(17) | 7.7(13)   | 1.1(14)   | 3.6(14)   |
| C27 | 49.9(18) | 43.4(17) | 45.7(16) | -3.4(13)  | 3.7(13)   | -1.6(14)  |
| C28 | 50.6(19) | 48.8(18) | 62.6(19) | 10.6(14)  | 16.2(15)  | -0.8(14)  |
| C31 | 47.4(17) | 47.6(17) | 49.2(17) | -8.3(13)  | 1.6(13)   | 6.2(13)   |
| C52 | 54.6(19) | 38.0(16) | 74(2)    | 12.4(15)  | 15.6(16)  | 3.3(14)   |
| C26 | 55.9(19) | 48.6(18) | 51.6(17) | -10.2(14) | 20.8(14)  | -3.2(15)  |
| C48 | 48.8(18) | 48.5(17) | 55.8(18) | 8.9(14)   | 2.7(14)   | 9.2(14)   |
| C58 | 58(2)    | 35.3(17) | 76(2)    | -11.2(15) | -16.1(17) | 2.7(14)   |
| C59 | 56.2(19) | 40.2(16) | 55.9(18) | -5.1(14)  | -11.9(14) | 3.5(14)   |
| C1  | 38.5(16) | 63(2)    | 61.0(19) | 6.6(16)   | -5.6(14)  | -0.8(14)  |
| C49 | 54(2)    | 45.5(18) | 75(2)    | 6.9(16)   | 2.1(17)   | 14.6(15)  |
| C50 | 51.5(19) | 44.8(19) | 85(2)    | -6.7(17)  | 15.0(17)  | 5.6(15)   |
| C40 | 52.4(17) | 53.7(18) | 33.8(14) | 1.2(13)   | 4.7(12)   | -7.5(14)  |
| C51 | 65(2)    | 51(2)    | 79(2)    | 5.1(17)   | 29.6(18)  | 4.0(17)   |
| C43 | 76(2)    | 50.0(19) | 42.7(16) | -8.5(13)  | 13.8(15)  | -24.8(16) |
| C34 | 58(2)    | 78(2)    | 34.8(15) | -6.9(15)  | 7.5(13)   | 6.5(16)   |
| C22 | 56.1(19) | 56.6(19) | 65(2)    | 5.6(17)   | 6.0(16)   | 9.8(16)   |
| C17 | 40.4(16) | 47.7(17) | 49.2(16) | -9.8(13)  | 5.7(12)   | 5.7(13)   |
| C18 | 44.2(18) | 58(2)    | 77(2)    | -19.5(17) | -6.4(15)  | 7.9(15)   |
| C41 | 84(2)    | 68(2)    | 37.0(16) | -12.1(15) | 10.4(15)  | -22.4(19) |
| C3  | 78(2)    | 71(2)    | 35.5(16) | 5.5(15)   | -8.1(15)  | 6.2(18)   |
| C19 | 59(2)    | 75(3)    | 109(3)   | -38(2)    | -29(2)    | 27(2)     |
| C21 | 104(3)   | 58(2)    | 72(2)    | 4.6(19)   | 2(2)      | 26(2)     |
| C20 | 102(3)   | 74(3)    | 76(3)    | -21(2)    | -30(2)    | 43(3)     |
| C30 | 83(3)    | 51(2)    | 89(3)    | 16.9(19)  | 22(2)     | 8.4(18)   |
| C60 | 90(3)    | 54(2)    | 77(2)    | 21.9(17)  | 17(2)     | 20.0(19)  |
| C42 | 118(3)   | 64(2)    | 51(2)    | -21.3(17) | 15(2)     | -45(2)    |

**Table S4. Bond Lengths for 3ak.**

| Atom | Atom | Length/Å |  | Atom | Atom | Length/Å |
|------|------|----------|--|------|------|----------|
| O5   | C37  | 1.392(3) |  | C5   | C2   | 1.560(4) |
| O5   | C36  | 1.389(3) |  | C45  | C44  | 1.495(4) |
| O2   | C7   | 1.393(3) |  | C54  | C55  | 1.371(4) |
| O2   | C6   | 1.383(3) |  | C54  | C59  | 1.384(4) |
| N1   | C7   | 1.264(3) |  | C9   | C10  | 1.374(4) |
| N1   | C5   | 1.472(3) |  | C32  | C33  | 1.524(4) |
| O3   | C23  | 1.227(3) |  | C32  | C31  | 1.525(4) |
| O1   | C6   | 1.196(3) |  | C32  | C34  | 1.532(4) |
| N3   | C35  | 1.477(3) |  | C16  | C17  | 1.483(4) |
| N3   | C37  | 1.261(3) |  | C57  | C56  | 1.376(4) |
| O4   | C27  | 1.374(3) |  | C57  | C58  | 1.383(4) |
| O4   | C30  | 1.426(4) |  | C55  | C56  | 1.387(4) |
| O6   | C36  | 1.196(3) |  | C13  | C12  | 1.382(4) |
| N2   | C24  | 1.422(3) |  | C39  | C40  | 1.378(4) |
| N2   | C23  | 1.340(3) |  | C2   | C4   | 1.535(4) |
| N4   | C54  | 1.428(3) |  | C2   | C1   | 1.525(4) |
| N4   | C53  | 1.351(3) |  | C2   | C3   | 1.531(4) |
| O7   | C53  | 1.221(3) |  | C12  | C11  | 1.375(4) |
| O8   | C57  | 1.374(3) |  | C47  | C52  | 1.385(4) |
| O8   | C60  | 1.426(4) |  | C47  | C48  | 1.394(4) |
| C7   | C8   | 1.460(3) |  | C11  | C10  | 1.380(4) |
| C8   | C9   | 1.387(3) |  | C25  | C26  | 1.379(4) |
| C8   | C13  | 1.390(3) |  | C29  | C28  | 1.396(4) |
| C24  | C25  | 1.385(4) |  | C27  | C28  | 1.372(4) |
| C24  | C29  | 1.379(4) |  | C27  | C26  | 1.383(4) |
| C35  | C36  | 1.512(4) |  | C52  | C51  | 1.383(4) |
| C35  | C44  | 1.547(4) |  | C48  | C49  | 1.378(4) |
| C35  | C32  | 1.570(4) |  | C58  | C59  | 1.381(4) |
| C6   | C5   | 1.521(4) |  | C49  | C50  | 1.368(4) |
| C23  | C16  | 1.506(4) |  | C50  | C51  | 1.374(4) |
| C37  | C38  | 1.466(3) |  | C40  | C41  | 1.370(4) |
| C14  | C15  | 1.496(4) |  | C43  | C42  | 1.379(4) |
| C14  | C5   | 1.559(3) |  | C22  | C17  | 1.388(4) |
| C38  | C39  | 1.383(4) |  | C22  | C21  | 1.385(5) |
| C38  | C43  | 1.378(4) |  | C17  | C18  | 1.390(4) |
| C15  | C16  | 1.330(4) |  | C18  | C19  | 1.377(5) |



|     |     |          |  |     |     |          |
|-----|-----|----------|--|-----|-----|----------|
| C46 | C45 | 1.337(4) |  | C41 | C42 | 1.374(4) |
| C46 | C53 | 1.505(4) |  | C19 | C20 | 1.365(6) |
| C46 | C47 | 1.482(4) |  | C21 | C20 | 1.379(6) |

**Table S5. Bond Angles for 3ak.**

| Atom | Atom | Atom | Angle/°    |  | Atom | Atom | Atom | Angle/°  |
|------|------|------|------------|--|------|------|------|----------|
| C36  | O5   | C37  | 105.22(19) |  | O7   | C53  | C46  | 120.7(2) |
| C6   | O2   | C7   | 105.50(19) |  | C10  | C9   | C8   | 120.0(2) |
| C7   | N1   | C5   | 107.6(2)   |  | C33  | C32  | C35  | 109.2(2) |
| C37  | N3   | C35  | 107.6(2)   |  | C33  | C32  | C31  | 109.3(2) |
| C27  | O4   | C30  | 117.4(2)   |  | C33  | C32  | C34  | 109.0(2) |
| C23  | N2   | C24  | 128.5(2)   |  | C31  | C32  | C35  | 109.3(2) |
| C53  | N4   | C54  | 126.1(2)   |  | C31  | C32  | C34  | 109.4(2) |
| C57  | O8   | C60  | 117.8(3)   |  | C34  | C32  | C35  | 110.7(2) |
| O2   | C7   | C8   | 115.8(2)   |  | C15  | C16  | C23  | 120.4(3) |
| N1   | C7   | O2   | 116.7(2)   |  | C15  | C16  | C17  | 122.3(3) |
| N1   | C7   | C8   | 127.5(2)   |  | C17  | C16  | C23  | 117.3(2) |
| C9   | C8   | C7   | 118.6(2)   |  | O8   | C57  | C56  | 124.7(3) |
| C9   | C8   | C13  | 119.9(2)   |  | O8   | C57  | C58  | 115.7(3) |
| C13  | C8   | C7   | 121.5(2)   |  | C56  | C57  | C58  | 119.7(3) |
| C25  | C24  | N2   | 117.5(2)   |  | C54  | C55  | C56  | 121.4(3) |
| C29  | C24  | N2   | 123.3(2)   |  | C12  | C13  | C8   | 119.4(3) |
| C29  | C24  | C25  | 119.1(3)   |  | C40  | C39  | C38  | 120.7(3) |
| N3   | C35  | C36  | 102.72(19) |  | C4   | C2   | C5   | 109.9(2) |
| N3   | C35  | C44  | 109.7(2)   |  | C1   | C2   | C5   | 108.8(2) |
| N3   | C35  | C32  | 109.34(19) |  | C1   | C2   | C4   | 108.5(2) |
| C36  | C35  | C44  | 108.8(2)   |  | C1   | C2   | C3   | 109.8(2) |
| C36  | C35  | C32  | 111.1(2)   |  | C3   | C2   | C5   | 110.9(2) |
| C44  | C35  | C32  | 114.5(2)   |  | C3   | C2   | C4   | 108.9(2) |
| O2   | C6   | C5   | 107.4(2)   |  | C57  | C56  | C55  | 119.3(3) |
| O1   | C6   | O2   | 120.7(2)   |  | C11  | C12  | C13  | 120.4(3) |
| O1   | C6   | C5   | 131.9(2)   |  | C52  | C47  | C46  | 121.0(2) |
| O3   | C23  | N2   | 124.5(3)   |  | C52  | C47  | C48  | 117.6(3) |
| O3   | C23  | C16  | 121.5(3)   |  | C48  | C47  | C46  | 121.4(3) |
| N2   | C23  | C16  | 114.0(2)   |  | C12  | C11  | C10  | 120.2(2) |
| O5   | C37  | C38  | 115.6(2)   |  | C26  | C25  | C24  | 120.5(3) |
| N3   | C37  | O5   | 116.8(2)   |  | C24  | C29  | C28  | 120.4(3) |
| N3   | C37  | C38  | 127.6(2)   |  | C9   | C10  | C11  | 120.0(3) |

|     |     |     |            |  |     |     |     |          |
|-----|-----|-----|------------|--|-----|-----|-----|----------|
| C15 | C14 | C5  | 110.1(2)   |  | O4  | C27 | C26 | 115.5(3) |
| O5  | C36 | C35 | 107.6(2)   |  | C28 | C27 | O4  | 124.7(3) |
| O6  | C36 | O5  | 120.7(3)   |  | C28 | C27 | C26 | 119.7(3) |
| O6  | C36 | C35 | 131.8(3)   |  | C27 | C28 | C29 | 120.0(3) |
| C39 | C38 | C37 | 119.5(2)   |  | C51 | C52 | C47 | 121.2(3) |
| C43 | C38 | C37 | 121.0(2)   |  | C25 | C26 | C27 | 120.2(3) |
| C43 | C38 | C39 | 119.5(2)   |  | C49 | C48 | C47 | 120.9(3) |
| C16 | C15 | C14 | 126.4(3)   |  | C59 | C58 | C57 | 120.4(3) |
| C45 | C46 | C53 | 121.7(2)   |  | C58 | C59 | C54 | 120.1(3) |
| C45 | C46 | C47 | 123.2(2)   |  | C50 | C49 | C48 | 120.6(3) |
| C47 | C46 | C53 | 115.1(2)   |  | C49 | C50 | C51 | 119.6(3) |
| N1  | C5  | C6  | 102.8(2)   |  | C41 | C40 | C39 | 119.4(3) |
| N1  | C5  | C14 | 108.80(19) |  | C50 | C51 | C52 | 120.2(3) |
| N1  | C5  | C2  | 109.9(2)   |  | C38 | C43 | C42 | 119.6(3) |
| C6  | C5  | C14 | 106.8(2)   |  | C21 | C22 | C17 | 121.2(3) |
| C6  | C5  | C2  | 112.5(2)   |  | C22 | C17 | C16 | 120.1(3) |
| C14 | C5  | C2  | 115.2(2)   |  | C22 | C17 | C18 | 117.9(3) |
| C46 | C45 | C44 | 127.5(3)   |  | C18 | C17 | C16 | 122.0(3) |
| C55 | C54 | N4  | 118.7(2)   |  | C19 | C18 | C17 | 120.5(4) |
| C55 | C54 | C59 | 119.0(3)   |  | C40 | C41 | C42 | 120.4(3) |
| C59 | C54 | N4  | 122.3(2)   |  | C20 | C19 | C18 | 121.0(4) |
| C45 | C44 | C35 | 111.4(2)   |  | C20 | C21 | C22 | 119.6(4) |
| N4  | C53 | C46 | 115.4(2)   |  | C19 | C20 | C21 | 119.7(4) |
| O7  | C53 | N4  | 123.9(3)   |  | C41 | C42 | C43 | 120.4(3) |

**Table S6. Torsion Angles for 3ak.**

| A  | B   | C   | D   | Angle/°   | A   | B   | C   | D   | Angle/°   |
|----|-----|-----|-----|-----------|-----|-----|-----|-----|-----------|
| O5 | C37 | C38 | C39 | -171.2(2) | C36 | C35 | C32 | C33 | -49.6(3)  |
| O5 | C37 | C38 | C43 | 10.2(4)   | C36 | C35 | C32 | C31 | -169.1(2) |
| O2 | C7  | C8  | C9  | 171.7(2)  | C36 | C35 | C32 | C34 | 70.4(3)   |
| O2 | C7  | C8  | C13 | -10.4(3)  | C38 | C39 | C40 | C41 | 0.3(4)    |
| O2 | C6  | C5  | N1  | 1.4(3)    | C38 | C43 | C42 | C41 | 0.4(6)    |
| O2 | C6  | C5  | C14 | -113.0(2) | C15 | C14 | C5  | N1  | -45.3(3)  |
| O2 | C6  | C5  | C2  | 119.6(2)  | C15 | C14 | C5  | C6  | 65.0(3)   |
| N1 | C7  | C8  | C9  | -9.6(4)   | C15 | C14 | C5  | C2  | -169.3(2) |
| N1 | C7  | C8  | C13 | 168.4(3)  | C15 | C16 | C17 | C22 | 45.4(4)   |
| N1 | C5  | C2  | C4  | -56.2(3)  | C15 | C16 | C17 | C18 | -135.2(3) |

|    |     |     |     |           |     |     |     |     |           |
|----|-----|-----|-----|-----------|-----|-----|-----|-----|-----------|
| N1 | C5  | C2  | C1  | 62.5(3)   | C46 | C45 | C44 | C35 | 105.5(3)  |
| N1 | C5  | C2  | C3  | -176.7(2) | C46 | C47 | C52 | C51 | -176.6(3) |
| O3 | C23 | C16 | C15 | 110.4(3)  | C46 | C47 | C48 | C49 | 176.1(3)  |
| O3 | C23 | C16 | C17 | -67.8(4)  | C5  | N1  | C7  | O2  | 1.8(3)    |
| O1 | C6  | C5  | N1  | 179.3(3)  | C5  | N1  | C7  | C8  | -177.0(2) |
| O1 | C6  | C5  | C14 | 64.8(4)   | C5  | C14 | C15 | C16 | 105.5(3)  |
| O1 | C6  | C5  | C2  | -62.5(4)  | C45 | C46 | C53 | N4  | -61.3(4)  |
| N3 | C35 | C36 | O5  | -3.3(3)   | C45 | C46 | C53 | O7  | 120.5(3)  |
| N3 | C35 | C36 | O6  | 175.5(3)  | C45 | C46 | C47 | C52 | 150.6(3)  |
| N3 | C35 | C44 | C45 | -46.5(3)  | C45 | C46 | C47 | C48 | -27.3(4)  |
| N3 | C35 | C32 | C33 | 63.0(3)   | C54 | N4  | C53 | O7  | 1.5(5)    |
| N3 | C35 | C32 | C31 | -56.5(3)  | C54 | N4  | C53 | C46 | -176.6(2) |
| N3 | C35 | C32 | C34 | -177.0(2) | C54 | C55 | C56 | C57 | 1.6(4)    |
| N3 | C37 | C38 | C39 | 9.1(4)    | C44 | C35 | C36 | O5  | -119.5(2) |
| N3 | C37 | C38 | C43 | -169.5(3) | C44 | C35 | C36 | O6  | 59.3(4)   |
| O4 | C27 | C28 | C29 | 177.8(3)  | C44 | C35 | C32 | C33 | -173.3(2) |
| O4 | C27 | C26 | C25 | -178.8(3) | C44 | C35 | C32 | C31 | 67.2(3)   |
| N2 | C24 | C25 | C26 | 172.5(3)  | C44 | C35 | C32 | C34 | -53.3(3)  |
| N2 | C24 | C29 | C28 | -173.3(3) | C53 | N4  | C54 | C55 | 140.8(3)  |
| N2 | C23 | C16 | C15 | -68.7(3)  | C53 | N4  | C54 | C59 | -40.0(4)  |
| N2 | C23 | C16 | C17 | 113.2(3)  | C53 | C46 | C45 | C44 | 3.3(4)    |
| N4 | C54 | C55 | C56 | 179.1(2)  | C53 | C46 | C47 | C52 | -30.5(4)  |
| N4 | C54 | C59 | C58 | 179.9(3)  | C53 | C46 | C47 | C48 | 151.6(3)  |
| O8 | C57 | C56 | C55 | 179.1(3)  | C9  | C8  | C13 | C12 | -1.9(4)   |
| O8 | C57 | C58 | C59 | 179.9(3)  | C32 | C35 | C36 | O5  | 113.5(2)  |
| C7 | O2  | C6  | O1  | -178.7(2) | C32 | C35 | C36 | O6  | -67.7(4)  |
| C7 | O2  | C6  | C5  | -0.5(3)   | C32 | C35 | C44 | C45 | -170.0(2) |
| C7 | N1  | C5  | C6  | -1.9(3)   | C16 | C17 | C18 | C19 | -179.7(3) |
| C7 | N1  | C5  | C14 | 111.1(2)  | C57 | C58 | C59 | C54 | 0.6(5)    |
| C7 | N1  | C5  | C2  | -121.9(2) | C55 | C54 | C59 | C58 | -0.9(4)   |
| C7 | C8  | C9  | C10 | -180.0(2) | C13 | C8  | C9  | C10 | 2.1(4)    |
| C7 | C8  | C13 | C12 | -179.8(2) | C13 | C12 | C11 | C10 | 1.4(4)    |
| C8 | C9  | C10 | C11 | -0.5(4)   | C39 | C38 | C43 | C42 | -0.8(5)   |

|     |     |     |     |           |     |     |     |     |           |
|-----|-----|-----|-----|-----------|-----|-----|-----|-----|-----------|
| C8  | C13 | C12 | C11 | 0.1(4)    | C39 | C40 | C41 | C42 | -0.7(5)   |
| C24 | N2  | C23 | O3  | -12.6(5)  | C56 | C57 | C58 | C59 | 0.9(5)    |
| C24 | N2  | C23 | C16 | 166.4(2)  | C12 | C11 | C10 | C9  | -1.3(4)   |
| C24 | C25 | C26 | C27 | 1.4(4)    | C47 | C46 | C45 | C44 | -177.8(2) |
| C24 | C29 | C28 | C27 | 0.8(4)    | C47 | C46 | C53 | N4  | 119.7(3)  |
| C35 | N3  | C37 | O5  | -1.0(3)   | C47 | C46 | C53 | O7  | -58.4(4)  |
| C35 | N3  | C37 | C38 | 178.7(2)  | C47 | C52 | C51 | C50 | -0.5(5)   |
| C6  | O2  | C7  | N1  | -0.8(3)   | C47 | C48 | C49 | C50 | 1.6(5)    |
| C6  | O2  | C7  | C8  | 178.1(2)  | C25 | C24 | C29 | C28 | 2.3(4)    |
| C6  | C5  | C2  | C4  | -170.1(2) | C29 | C24 | C25 | C26 | -3.4(4)   |
| C6  | C5  | C2  | C1  | -51.4(3)  | C28 | C27 | C26 | C25 | 1.8(4)    |
| C6  | C5  | C2  | C3  | 69.4(3)   | C52 | C47 | C48 | C49 | -1.9(4)   |
| C23 | N2  | C24 | C25 | 169.1(3)  | C26 | C27 | C28 | C29 | -2.8(4)   |
| C23 | N2  | C24 | C29 | -15.1(4)  | C48 | C47 | C52 | C51 | 1.4(4)    |
| C23 | C16 | C17 | C22 | -136.5(3) | C48 | C49 | C50 | C51 | -0.7(5)   |
| C23 | C16 | C17 | C18 | 42.9(4)   | C58 | C57 | C56 | C55 | -1.9(4)   |
| C37 | O5  | C36 | O6  | -176.2(3) | C59 | C54 | C55 | C56 | -0.1(4)   |
| C37 | O5  | C36 | C35 | 2.8(3)    | C49 | C50 | C51 | C52 | 0.1(5)    |
| C37 | N3  | C35 | C36 | 2.6(3)    | C40 | C41 | C42 | C43 | 0.4(6)    |
| C37 | N3  | C35 | C44 | 118.1(2)  | C43 | C38 | C39 | C40 | 0.5(4)    |
| C37 | N3  | C35 | C32 | -115.4(2) | C22 | C17 | C18 | C19 | -0.3(4)   |
| C37 | C38 | C39 | C40 | -178.1(3) | C22 | C21 | C20 | C19 | 0.3(6)    |
| C37 | C38 | C43 | C42 | 177.7(3)  | C17 | C22 | C21 | C20 | -0.7(5)   |
| C14 | C15 | C16 | C23 | 6.7(4)    | C17 | C18 | C19 | C20 | 0.0(5)    |
| C14 | C15 | C16 | C17 | -175.3(2) | C18 | C19 | C20 | C21 | 0.0(6)    |
| C14 | C5  | C2  | C4  | 67.1(3)   | C21 | C22 | C17 | C16 | -179.9(3) |
| C14 | C5  | C2  | C1  | -174.2(2) | C21 | C22 | C17 | C18 | 0.6(5)    |
| C14 | C5  | C2  | C3  | -53.3(3)  | C30 | O4  | C27 | C28 | -5.5(4)   |
| C36 | O5  | C37 | N3  | -1.2(3)   | C30 | O4  | C27 | C26 | 175.1(3)  |
| C36 | O5  | C37 | C38 | 179.1(2)  | C60 | O8  | C57 | C56 | -6.3(4)   |
| C36 | C35 | C44 | C45 | 65.1(3)   | C60 | O8  | C57 | C58 | 174.7(3)  |

**Table S7. Hydrogen Atom Coordinates ( $\text{\AA} \times 10^4$ ) and Isotropic Displacement Parameters ( $\text{\AA}^2 \times 10^3$ ) for 3ak.**

| Atom | x        | y       | z        | U(eq) |
|------|----------|---------|----------|-------|
| H2   | 7314.89  | 5354.02 | 6691.64  | 51    |
| H4   | 4677.66  | 4984.21 | 2175.41  | 50    |
| H14A | 7483.37  | 5488.29 | 9222.17  | 49    |
| H14B | 7709.8   | 6034.51 | 10127.06 | 49    |
| H15  | 6764.59  | 6658.7  | 8598.27  | 49    |
| H45  | 5387.45  | 3706.72 | 4047.22  | 51    |
| H44A | 4599.77  | 4876.73 | 4456.83  | 53    |
| H44B | 4364.35  | 4344.01 | 5364.85  | 53    |
| H9   | 9043.68  | 5770.74 | 5053.94  | 46    |
| H55  | 4254.49  | 5597.59 | 315.65   | 54    |
| H13  | 9270.71  | 7479.57 | 5950.11  | 50    |
| H39  | 3544.41  | 4486.35 | 119.09   | 49    |
| H56  | 4015.62  | 6548.27 | -408.63  | 54    |
| H12  | 9215.5   | 7713.08 | 3856.48  | 58    |
| H33A | 23.66    | 4879.97 | 3885.96  | 73    |
| H33B | 463.76   | 4214.08 | 3970.23  | 73    |
| H33C | 720.59   | 4589.16 | 2769.63  | 73    |
| H11  | 9123.03  | 6982.18 | 2380.26  | 58    |
| H25  | 8394.31  | 4613.81 | 5749.25  | 58    |
| H29  | 5714.94  | 4227.45 | 8128.94  | 61    |
| H10  | 9000.96  | 6012.43 | 2974.69  | 54    |
| H4A  | 8986.22  | 4828.64 | 9189.86  | 77    |
| H4B  | 10482.27 | 4678.66 | 9320.76  | 77    |
| H4C  | 9850.27  | 4920.46 | 8041.21  | 77    |
| H28  | 6382.85  | 3254.6  | 8148.26  | 64    |
| H31A | 2311.67  | 5410.03 | 2941.56  | 72    |
| H31B | 3103.55  | 5525.91 | 4227.49  | 72    |
| H31C | 1604.21  | 5668.22 | 4085.66  | 72    |
| H52  | 7434.91  | 4432.51 | 1076.08  | 66    |

|      |          |         |          |     |
|------|----------|---------|----------|-----|
| H26  | 9096.79  | 3655.37 | 5817.7   | 62  |
| H48  | 7284.15  | 3292.19 | 3884.41  | 61  |
| H58  | 6080.6   | 7119.77 | 2614.6   | 69  |
| H59  | 6256.24  | 6172.18 | 3357.22  | 62  |
| H1A  | 11380.65 | 5750.97 | 8020.25  | 82  |
| H1B  | 12076.58 | 5461.26 | 9223.47  | 82  |
| H1C  | 11656.83 | 6130.05 | 9243.9   | 82  |
| H49  | 8612.22  | 2666.71 | 2884.51  | 70  |
| H50  | 9391.07  | 2924.5  | 1010.56  | 72  |
| H40  | 3353.82  | 4256.27 | -1971.76 | 56  |
| H51  | 8791.04  | 3806.74 | 100.98   | 77  |
| H43  | 1812.2   | 2979.22 | 923.75   | 67  |
| H34A | 1227.75  | 5031.82 | 5905.98  | 85  |
| H34B | 2737.35  | 4914.14 | 6050.22  | 85  |
| H34C | 1758.95  | 4379.2  | 5937.09  | 85  |
| H22  | 6463.1   | 6989.01 | 6407.15  | 71  |
| H18  | 3401.67  | 5980.23 | 6977.1   | 72  |
| H41  | 2364.03  | 3394.42 | -2609.04 | 75  |
| H3A  | 10330.92 | 5987.87 | 11058.67 | 93  |
| H3B  | 10854.87 | 5334.2  | 11120.36 | 93  |
| H3C  | 9346.11  | 5455.58 | 11060.73 | 93  |
| H19  | 2130.56  | 6588.78 | 5718.46  | 99  |
| H21  | 5168.26  | 7601.8  | 5160.83  | 94  |
| H20  | 2992.46  | 7394.34 | 4809.07  | 102 |
| H30A | 6899.93  | 2346.8  | 7598.21  | 110 |
| H30B | 7946.65  | 2533.67 | 8663.15  | 110 |
| H30C | 8259.12  | 2025.83 | 7720.84  | 110 |
| H60A | 4888.44  | 7425.61 | -1147.51 | 110 |
| H60B | 4483.87  | 8051.99 | -662.2   | 110 |
| H60C | 3530.4   | 7511.78 | -572.25  | 110 |
| H42  | 1606.6   | 2756.84 | -1171.86 | 93  |

## Density functional calculations (DFT)

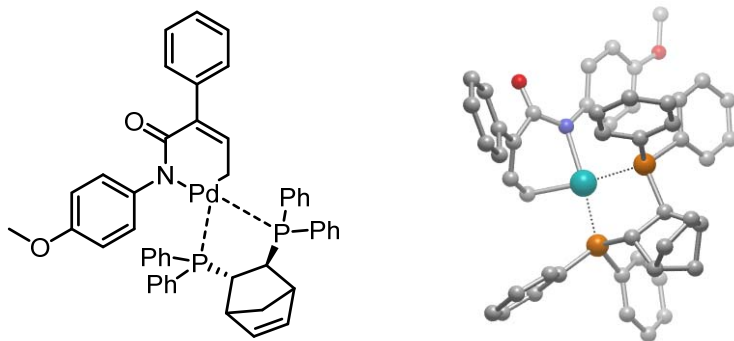

$$G = -18.0 \text{ kcal/mol}$$

### Calculation method

Density functional calculations (DFT) are implemented using the Gaussian 09 package.<sup>4</sup> Geometry optimizations are performed using the Minnesota M06 functional as it has been successful in describing a plethora of transition metal-catalyzed reactions.<sup>5</sup> The LANL2DZ effective core potential method with an extra *f*-polarization function ( $\zeta^f = 1.472$ ) is used as the basis set for Pd, and the 6-31G(d) basis set is used for all other atoms.<sup>6</sup>

---

<sup>4</sup> Frisch, M. J.; Trucks, G. W.; Schlegel, H. B.; Scuseria, G. E.; Robb, M. A.; Cheeseman, J. R.; Scalmani, G.; Barone, V.; Mennucci, B.; Petersson, G. A.; Nakatsuji, H.; Caricato, M.; Li, X.; Hratchian, H. P.; Izmaylov, A. F.; Bloino, J.; Zheng, G.; Sonnenberg, J. L.; Hada, M.; Ehara, M.; Toyota, K.; Fukuda, R.; Hasegawa, J.; Ishida, M.; Nakajima, T.; Honda, Y.; Kitao, O.; Nakai, H.; Vreven, T.; Montgomery, J. A., Jr.; Peralta, J. E.; Ogliaro, F.; Bearpark, M.; Heyd, J. J.; Brothers, E.; Kudin, K. N.; Staroverov, V. N.; Kobayashi, R.; Normand, J.; Raghavachari, K.; Rendell, A.; Burant, J. C.; Iyengar, S. S.; Tomasi, J.; Cossi, M.; Rega, N.; Millam, N. J.; Klene, M.; Knox, J. E.; Cross, J. B.; Bakken, V.; Adamo, C.; Jaramillo, J.; Gomperts, R.; Stratmann, R. E.; Yazyev, O.; Austin, A. J.; Cammi, R.; Pomelli, C.; Ochterski, J. W.; Martin, R. L.; Morokuma, K.; Zakrzewski, V. G.; Voth, G. A.; Salvador, P.; Dannenberg, J. J.; Dapprich, S.; Daniels, A. D.; Farkas, Ö.; Foresman, J. B.; Ortiz, J. V.; Cioslowski, J.; Fox, D. J. *Gaussian 09*; Gaussian, Inc.: Wallingford, CT, 2009.

<sup>5</sup> (a) Zhao, Y.; Truhlar, D. G. *Theor. Chem. Acc.* **2007**, *120*, 215–241. (b) Mandal, N.; Datta, A. *J. Org. Chem.* **2020**, *85*, 13228–13238.

<sup>6</sup> (a) Hariharan, P. C.; Pople, J. A. *Theor. Chim. Acta* **1973**, *28*, 213–222. (b) Hay, P. J.; Wadt, W. R. *J. Chem. Phys.* **1985**, *82*, 284–298. (c) Hay, P. J.; Wadt, W. R. *J. Chem. Phys.* **1985**, *82*, 299–310.
